# Supplementary material for: Dual and Single-species Nematode Infections Distinctly Modulate Defense Metabolism in Brassica nigra Roots
Source: J Chem Ecol. 2025 Sep 10;51(5):90. doi: 10.1007/s10886-025-01637-8 (PMC12423230; doi:10.1007/s10886-025-01637-8)
Supplement: Supplementary file 1 — Supplementary file1 (XLSX 2.95 MB) [file 10886_2025_1637_MOESM1_ESM.xlsx]

## Sheet: Table S1
Table S1 Genes and primer sequences
Gene ID	Gene description	Primer sequence 5' to 3'
CYP79B2	CYTOCHROME P450, FAMILY 79, SUBFAMILY B, POLYPEPTIDE 2	AAGAGGTTGTGCTGCTCCG
		TCCAAGTGAAACCTTGAAGAAGTC
CYP83A1	CYTOCHROME P450, FAMILY 83, SUBFAMILY A, POLYPEPTIDE 1	CTCCTTATCCCTCGTGCTTG
		TGTCGTAACCAGCGATCTTG
MYB122	transcription factor MYB122	GCTCGTCGATTACCATTAAT
		TGACCGATGCTTTTATCCGG
PR1	Pathogenesis-related protein 1	ATCCCTCGAAAGCTCAAGACA
		CGCTGACGCCAGAAAAGTC
PAL1	Phenylalanine amonia-lyase-1	CTCATGTTCGCTCAGTTCTCC
		GCTCCTTTGAAACCGTAGTCC
ERF1	Ethylene response factor 1	CGGCGGAGAGAGTTAAAGAG
		AACACCCATCCTCGTAGCTG
GAPDH	Housekeeping gene	AGTTGTTGACCTCACGGTTAGAC
		TTCCTCCTTGATAGCCTTCTTG
TIP41	Housekeeping gene	TGCGAAAGGGTATCCAGTTG
		ATCACCGGAAGCCTCTGAC

## Sheet: Table S2
Table S2. Statistical evaluation of (a) group patterns and (b) pair-wise comparisons found after performing Principal Component Analysis (PCA) of the untargeted metabolomic data from roots of uninfected (Control) and nematode-infected Brassica nigra plants. Abbreviations: Mi = Meloidogyne incognita, Pp = Pratylenchus penetrans, MP = M. incognita + P. penetrans
		a. PERMANOVA: F-value: 5.114; R2: 0.56112; p-value (based on 999 permutations): 0.006
		b. Pair-wise PERMANOVA results
			F.Model	R2	pval
		Control vs Mi	1.5857	0.16542	0.238
		Control vs MP	12.103	0.66856	0.018
		Control vs Pp	1.6379	0.21444	0.202
		Mi vs MP	10.603	0.63861	0.022
		Mi vs Pp	0.17232	0.02792	0.889
		MP vs Pp	17.528	0.8142	0.1

## Sheet: Table S3-a_mi-control
FeatureID	FC	log2.FC.	raw.pval	minusLOG10.p.	up.down	shared.unique	RT	m.z	Name	kingdom_CF	superclass_CF	class_CF	subclass_CF	parent_CF	pathway_NP	superclass_NP	class_NP
8596	0.31073	-1.6862	0.016452	1.7838	down	shared by all	998.74	394.323		NA	NA	NA	NA	NA	NA	NA	NA
9150	0.26567	-1.9123	0.020674	1.6846	down	shared by all	1015.36	630.522		NA	NA	NA	NA	NA	NA	NA	NA
3839	3.1369	1.6493	0.0086345	2.0638	up	shared by all	62.39	255.075		NA	NA	NA	NA	NA	NA	NA	NA
4458	0.32598	-1.6171	0.016047	1.7946	down	shared with mp	225.47	684.264		NA	NA	NA	NA	NA	NA	NA	NA
4460	0.20414	-2.2924	0.035584	1.4487	down	shared with mp	225.68	701.291		NA	NA	NA	NA	NA	NA	NA	NA
4476	0.28246	-1.8239	0.041689	1.38	down	shared with mp	225.74	130.042		NA	NA	NA	NA	NA	NA	NA	NA
4480	0.48816	-1.0346	0.021165	1.6744	down	shared with mp	225.42	162.068		NA	NA	NA	NA	NA	NA	NA	NA
1244	2.6564	1.4095	0.016745	1.7761	up	shared with mp	604.45	189.025		NA	NA	NA	NA	NA	NA	NA	NA
5836	3.1701	1.6645	0.020624	1.6856	up	shared with mp	604.63	216.036		NA	NA	NA	NA	NA	NA	NA	NA
8740	2.7972	1.484	0.04967	1.3039	up	shared with mp	1005.75	148.016		NA	NA	NA	NA	NA	NA	NA	NA
9580	6.8291	2.7717	0.023223	1.6341	up	shared with mp	1031.63	588.457		NA	NA	NA	NA	NA	NA	NA	NA
534	0.28171	-1.8277	0.021953	1.6585	down	shared with mp	225.42	359.158		Organic compounds	Organic acids and derivatives	Carboxylic acids and derivatives	Amino acids, peptides, and analogues	Amino acids and derivatives	Alkaloids	Pseudoalkaloids	Purine nucleos(t)ides
6766	0.22947	-2.1236	0.0030478	2.516	down	shared with pp	878.36	570.235		NA	NA	NA	NA	NA	NA	NA	NA
3646	2.2368	1.1614	0.021774	1.6621	up	shared with pp	62.61	273.085		NA	NA	NA	NA	NA	NA	NA	NA
4931	4.1975	2.0695	0.0030741	2.5123	up	shared with pp	259.45	224.068		Organic compounds	Phenylpropanoids and polyketides	Cinnamic acids and derivatives	Hydroxycinnamic acids and derivatives	Coumaric acids and derivatives	Shikimates and Phenylpropanoids	Phenylpropanoids (C6-C3)	Cinnamic acids and derivatives
4146	2.5922	1.3742	0.044237	1.3542	up	shared with pp	167.46	327.131		Organic compounds	Organic acids and derivatives	Carboxylic acids and derivatives	Amino acids, peptides, and analogues	Tyrosine and derivatives	Amino acids and Peptides	Small peptides	Dipeptides
3958	2.0936	1.066	0.031079	1.5075	up	uniquelyDA	87.01	279.131		Organic compounds	Organic acids and derivatives	Carboxylic acids and derivatives	Amino acids, peptides, and analogues	Alpha amino acids and derivatives	Amino acids and Peptides	Aminosugars and aminoglycosides	Dipeptides
1333	0.49572	-1.0124	0.0092058	2.0359	down	uniquelyDA	678.5	382.144		Organic compounds	Organoheterocyclic compounds	Diazanaphthalenes	Benzodiazines	Quinoxalines	Alkaloids	Anthranilic acid alkaloids	Quinazoline alkaloids
5961	0.38612	-1.3729	0.010198	1.9915	down	uniquelyDA	678.44	292.203		Organic compounds	Lipids and lipid-like molecules	Fatty Acyls	Eicosanoids	Prostaglandins and related compounds	Terpenoids	Diterpenoids	Other Octadecanoids
10991	0.053409	-4.2268	0.027468	1.5612	down	uniquelyDA	1079.53	414.348		NA	NA	NA	NA	NA	NA	NA	NA
1334	0.1609	-2.6358	0.008927	2.0493	down	uniquelyDA	678.54	680.411		NA	NA	NA	NA	NA	NA	NA	NA
3037	0.37669	-1.4085	0.033615	1.4735	down	uniquelyDA	56.06	593.751		NA	NA	NA	NA	NA	NA	NA	NA
3746	0.29177	-1.7771	0.046948	1.3284	down	uniquelyDA	62.26	511.19		NA	NA	NA	NA	NA	NA	NA	NA
4276	0.18186	-2.4591	0.012663	1.8975	down	uniquelyDA	207.62	350.098		NA	NA	NA	NA	NA	NA	NA	NA
4818	0.35702	-1.4859	0.03633	1.4397	down	uniquelyDA	250.33	528.161		NA	NA	NA	NA	NA	NA	NA	NA
5232	0.20856	-2.2615	0.040666	1.3908	down	uniquelyDA	286.62	435.216		NA	NA	NA	NA	NA	NA	NA	NA
5956	0.41712	-1.2615	0.01255	1.9014	down	uniquelyDA	678.44	274.193		NA	NA	NA	NA	NA	NA	NA	NA
5957	0.35992	-1.4743	0.013228	1.8785	down	uniquelyDA	678.43	328.222		NA	NA	NA	NA	NA	NA	NA	NA
5958	0.45352	-1.1408	0.015382	1.813	down	uniquelyDA	678.47	212.14		NA	NA	NA	NA	NA	NA	NA	NA
5962	0.28941	-1.7888	0.028982	1.5379	down	uniquelyDA	678.36	694.397		NA	NA	NA	NA	NA	NA	NA	NA
5963	0.1123	-3.1546	0.048953	1.3102	down	uniquelyDA	678.42	678.428		NA	NA	NA	NA	NA	NA	NA	NA
8311	0.19342	-2.3702	0.014031	1.8529	down	uniquelyDA	988.11	706.456		NA	NA	NA	NA	NA	NA	NA	NA
9409	0.27808	-1.8464	0.018884	1.7239	down	uniquelyDA	1027.26	424.334		NA	NA	NA	NA	NA	NA	NA	NA
10552	2.5996	1.3783	0.024179	1.6166	up	uniquelyDA	1063.83	310.303		NA	NA	NA	NA	NA	NA	NA	NA
1157	2.1658	1.1149	0.042328	1.3734	up	uniquelyDA	501.65	455.089		NA	NA	NA	NA	NA	NA	NA	NA
2310	3.2859	1.7163	0.039636	1.4019	up	uniquelyDA	1044.38	625.47		NA	NA	NA	NA	NA	NA	NA	NA
2352	2.0091	1.0065	0.045732	1.3398	up	uniquelyDA	1051.82	884.483		NA	NA	NA	NA	NA	NA	NA	NA
249	2.5325	1.3406	0.0016029	2.7951	up	uniquelyDA	62.32	145.085		NA	NA	NA	NA	NA	NA	NA	NA
3606	2.212	1.1453	0.046822	1.3295	up	uniquelyDA	62.55	279.131		NA	NA	NA	NA	NA	NA	NA	NA
3735	2.0895	1.0631	0.022891	1.6403	up	uniquelyDA	62.37	233.126		NA	NA	NA	NA	NA	NA	NA	NA
3964	2.1602	1.1111	0.020114	1.6965	up	uniquelyDA	86.93	273.085		NA	NA	NA	NA	NA	NA	NA	NA
4370	2.6888	1.427	0.048415	1.315	up	uniquelyDA	217.4	608.186		NA	NA	NA	NA	NA	NA	NA	NA
5117	2.389	1.2564	0.012394	1.9068	up	uniquelyDA	269.69	428.071		NA	NA	NA	NA	NA	NA	NA	NA
5295	2.8022	1.4865	0.000155	3.8083	up	uniquelyDA	299.12	181.056		NA	NA	NA	NA	NA	NA	NA	NA
5548	2.0771	1.0545	0.043796	1.3586	up	uniquelyDA	353.45	429.109		NA	NA	NA	NA	NA	NA	NA	NA
5645	2.6142	1.3864	0.0015705	2.804	up	uniquelyDA	397.62	324.12		NA	NA	NA	NA	NA	NA	NA	NA
5838	2.0765	1.0542	0.0045735	2.3398	up	uniquelyDA	605.46	476.168		NA	NA	NA	NA	NA	NA	NA	NA
804	3.0718	1.6191	0.016548	1.7813	up	uniquelyDA	270.03	750.188		NA	NA	NA	NA	NA	NA	NA	NA
9645	2.101	1.0711	0.022982	1.6386	up	uniquelyDA	1034.1	611.464		NA	NA	NA	NA	NA	NA	NA	NA
796	3.4612	1.7913	0.011923	1.9236	up	uniquelyDA	268.62	802.202		Organic compounds	Organic acids and derivatives	Carboxylic acids and derivatives	Amino acids, peptides, and analogues	Alpha amino acids and derivatives	Shikimates and Phenylpropanoids	Nicotinic acid alkaloids	Pyrimidine nucleos(t)ides
9842	2.6009	1.379	0.047549	1.3229	up	uniquelyDA	1042.38	478.353		Organic compounds	Organic acids and derivatives	Carboxylic acids and derivatives	Amino acids, peptides, and analogues	N-acyl-alpha amino acids and derivatives	Amino acids and Peptides	Oligopeptides	Cyclic peptides
4361	2.0026	1.0019	0.04456	1.3511	up	uniquelyDA	216.71	442.051		Organic compounds	Organohalogen compounds	Aryl halides	Aryl bromides	Aryl bromides	Alkaloids	Tryptophan alkaloids	Carboline alkaloids

## Sheet: Table S3-b_pp-control
FeatureID	FC	log2.FC.	raw.pval	minusLOG10.p.	up.down	shared.unique	RT	m.z	Name	kingdom_CF	superclass_CF	class_CF	subclass_CF	parent_CF	pathway_NP	superclass_NP	class_NP
3550	2.2067	1.1419	0.011914	1.924	up	uniquelyDA	60.21	260.029	D-Glucose 6-phosphate	NA	NA	NA	NA	NA	NA	NA	NA
3954	2.0607	1.0432	0.023195	1.6346	up	uniquelyDA	86.85	359.034	Sinigrin	Organic compounds	Organic oxygen compounds	Organooxygen compounds	Carbohydrates and carbohydrate conjugates	Alkylglucosinolates	Amino acids and Peptides	Amino acid glycosides	Glucosinolates
8042	0.43874	-1.1886	0.0013667	2.8643	down	uniquelyDA	975.11	457.341		Organic compounds	Lipids and lipid-like molecules	Fatty Acyls	Fatty amides	Fatty amides	Polyketides	Diterpenoids	Isariotin alkaloids
7033	0.47488	-1.0744	0.04853	1.314	down	uniquelyDA	905.33	654.384		Organic compounds	Lipids and lipid-like molecules	Saccharolipids	NA	Saccharolipids	Fatty acids	Fatty acyl glycosides	Fatty acyl glycosides of mono- and disaccharides
7034	0.4779	-1.0652	0.029227	1.5342	down	uniquelyDA	905.4	492.33		Organic compounds	Lipids and lipid-like molecules	Fatty Acyls	Fatty acyl glycosides	Alkyl glycosides	Fatty acids	Fatty acyl glycosides	Fatty acyl glycosides of mono- and disaccharides
6442	0.44013	-1.184	0.013221	1.8787	down	uniquelyDA	835.08	490.314		Organic compounds	Lipids and lipid-like molecules	Glycerolipids	Glycosylglycerols	Glycosylglycerols	Fatty acids	Glycerolipids	Glycosylmonoacylglycerols
6466	0.37595	-1.4114	0.0084495	2.0732	down	uniquelyDA	835.12	328.261		Organic compounds	Lipids and lipid-like molecules	Glycerolipids	Monoradylglycerols	1-monoacylglycerols	Fatty acids	Glycerolipids	Monoacylglycerols
6972	0.44845	-1.157	0.0063828	2.195	down	uniquelyDA	899.2	328.261		Organic compounds	Lipids and lipid-like molecules	Glycerolipids	Monoradylglycerols	Monoacylglycerols	Fatty acids	Glycerolipids	Monoacylglycerols
8507	0.43138	-1.213	0.030545	1.5151	down	uniquelyDA	994.81	576.511		Organic compounds	Lipids and lipid-like molecules	Glycerolipids	Diradylglycerols	Diacylglycerols	Fatty acids	Glycerolipids	Triacylglycerols
615	0.29203	-1.7758	0.035514	1.4496	down	shared with mp	236.08	248.079		NA	NA	NA	NA	NA	NA	NA	NA
773	0.17441	-2.5194	0.02896	1.5382	down	uniquelyDA	262.68	293.126		NA	NA	NA	NA	NA	NA	NA	NA
1081	0.47244	-1.0818	0.0050911	2.2932	down	shared with mp	443.21	372.121		NA	NA	NA	NA	NA	NA	NA	NA
1164	0.39582	-1.3371	0.020784	1.6823	down	uniquelyDA	508.17	192.078		NA	NA	NA	NA	NA	NA	NA	NA
1165	0.33946	-1.5587	0.025952	1.5858	down	uniquelyDA	508.61	579.196		NA	NA	NA	NA	NA	NA	NA	NA
1604	0.34409	-1.5391	0.015149	1.8196	down	uniquelyDA	835.03	669.394		NA	NA	NA	NA	NA	NA	NA	NA
1608	0.37008	-1.4341	0.03714	1.4302	down	uniquelyDA	835.48	690.313		NA	NA	NA	NA	NA	NA	NA	NA
1799	0.28695	-1.8011	0.041501	1.3819	down	shared with mp	911.05	717.576		NA	NA	NA	NA	NA	NA	NA	NA
1929	0.49585	-1.012	0.021101	1.6757	down	uniquelyDA	952.59	442.343		NA	NA	NA	NA	NA	NA	NA	NA
2389	0.41007	-1.2861	0.028672	1.5425	down	shared with mp	1060.32	298.241		NA	NA	NA	NA	NA	NA	NA	NA
2458	0.21837	-2.1952	0.024224	1.6158	down	uniquelyDA	1074.79	556.171		NA	NA	NA	NA	NA	NA	NA	NA
2674	0.15086	-2.7287	0.029533	1.5297	down	uniquelyDA	53.13	713.828		NA	NA	NA	NA	NA	NA	NA	NA
2693	0.37939	-1.3983	0.0062277	2.2057	down	uniquelyDA	53.72	691.825		NA	NA	NA	NA	NA	NA	NA	NA
2752	0.34719	-1.5262	0.024979	1.6024	down	uniquelyDA	54.8	835.785		NA	NA	NA	NA	NA	NA	NA	NA
2756	0.3793	-1.3986	0.049151	1.3085	down	uniquelyDA	52.9	675.848		NA	NA	NA	NA	NA	NA	NA	NA
2786	0.49802	-1.0057	0.010037	1.9984	down	uniquelyDA	54.17	429.906		NA	NA	NA	NA	NA	NA	NA	NA
2789	0.48112	-1.0555	0.026532	1.5762	down	uniquelyDA	54.21	565.882		NA	NA	NA	NA	NA	NA	NA	NA
2790	0.48926	-1.0313	0.018568	1.7312	down	uniquelyDA	54.23	497.894		NA	NA	NA	NA	NA	NA	NA	NA
2791	0.45414	-1.1388	0.017322	1.7614	down	uniquelyDA	54.38	633.869		NA	NA	NA	NA	NA	NA	NA	NA
2793	0.43552	-1.1992	0.018355	1.7362	down	uniquelyDA	54.32	701.857		NA	NA	NA	NA	NA	NA	NA	NA
2795	0.38692	-1.3699	0.012531	1.902	down	uniquelyDA	54.36	769.843		NA	NA	NA	NA	NA	NA	NA	NA
2999	0.48779	-1.0357	0.014031	1.8529	down	uniquelyDA	56.14	351.89		NA	NA	NA	NA	NA	NA	NA	NA
3009	0.46411	-1.1075	0.0048824	2.3114	down	uniquelyDA	55.83	419.877		NA	NA	NA	NA	NA	NA	NA	NA
3043	0.44424	-1.1706	0.04565	1.3406	down	uniquelyDA	54.26	905.819		NA	NA	NA	NA	NA	NA	NA	NA
3065	0.47019	-1.0887	0.019831	1.7027	down	uniquelyDA	54.65	989.781		NA	NA	NA	NA	NA	NA	NA	NA
3070	0.47439	-1.0759	0.0067276	2.1721	down	uniquelyDA	54.51	921.793		NA	NA	NA	NA	NA	NA	NA	NA
3354	0.38075	-1.3931	0.035711	1.4472	down	uniquelyDA	58.4	312.044		NA	NA	NA	NA	NA	NA	NA	NA
3424	0.36378	-1.4589	0.035106	1.4546	down	uniquelyDA	58.41	290.061		NA	NA	NA	NA	NA	NA	NA	NA
3479	0.39624	-1.3356	0.018495	1.7329	down	uniquelyDA	60.3	250.068		NA	NA	NA	NA	NA	NA	NA	NA
3840	0.45078	-1.1495	0.034859	1.4577	down	uniquelyDA	62.4	173.997		NA	NA	NA	NA	NA	NA	NA	NA
4182	0.091845	-3.4447	0.031215	1.5056	down	shared with mp	181.43	307.126		NA	NA	NA	NA	NA	NA	NA	NA
5258	0.41136	-1.2815	0.028758	1.5412	down	uniquelyDA	291.7	208.073		NA	NA	NA	NA	NA	NA	NA	NA
5335	0.27016	-1.8881	0.0394	1.4045	down	uniquelyDA	303.92	312.083		NA	NA	NA	NA	NA	NA	NA	NA
5353	0.033992	-4.8787	0.0021596	2.6656	down	uniquelyDA	310.04	262.106		NA	NA	NA	NA	NA	NA	NA	NA
6116	0.47887	-1.0623	0.042223	1.3745	down	uniquelyDA	762.27	224.14		NA	NA	NA	NA	NA	NA	NA	NA
6340	0.21777	-2.1992	0.025946	1.5859	down	uniquelyDA	821.95	1390.68		NA	NA	NA	NA	NA	NA	NA	NA
6433	0.111	-3.1714	0.027024	1.5683	down	uniquelyDA	831.19	555.263		NA	NA	NA	NA	NA	NA	NA	NA
6441	0.4268	-1.2284	0.032598	1.4868	down	uniquelyDA	835.05	652.368		NA	NA	NA	NA	NA	NA	NA	NA
6611	0.409	-1.2898	0.042083	1.3759	down	uniquelyDA	859.18	700.352		NA	NA	NA	NA	NA	NA	NA	NA
6766	0.36542	-1.4524	0.037086	1.4308	down	shared with mi	878.36	570.235		NA	NA	NA	NA	NA	NA	NA	NA
6769	0.35231	-1.5051	0.034192	1.4661	down	uniquelyDA	878.22	609.238		NA	NA	NA	NA	NA	NA	NA	NA
7608	0.40007	-1.3217	0.042215	1.3745	down	uniquelyDA	949.29	711.487		NA	NA	NA	NA	NA	NA	NA	NA
7967	0.45306	-1.1422	0.04795	1.3192	down	uniquelyDA	969.63	488.299		NA	NA	NA	NA	NA	NA	NA	NA
7985	0.48634	-1.0399	0.027477	1.561	down	uniquelyDA	971.26	540.328		NA	NA	NA	NA	NA	NA	NA	NA
8032	0.49496	-1.0146	0.0046368	2.3338	down	uniquelyDA	975.04	440.314		NA	NA	NA	NA	NA	NA	NA	NA
8070	0.48099	-1.0559	0.0027312	2.5636	down	uniquelyDA	975.55	396.287		NA	NA	NA	NA	NA	NA	NA	NA
8456	0.3149	-1.667	0.017252	1.7632	down	uniquelyDA	993.03	442.31		NA	NA	NA	NA	NA	NA	NA	NA
8473	0.28331	-1.8195	0.019992	1.6991	down	uniquelyDA	992.15	713.5		NA	NA	NA	NA	NA	NA	NA	NA
8596	0.2689	-1.8948	0.014733	1.8317	down	shared by all	998.74	394.323		NA	NA	NA	NA	NA	NA	NA	NA
8736	0.46783	-1.096	0.040545	1.3921	down	uniquelyDA	1005.45	470.303		NA	NA	NA	NA	NA	NA	NA	NA
8799	0.17611	-2.5054	0.026591	1.5753	down	uniquelyDA	1007.85	574.496		NA	NA	NA	NA	NA	NA	NA	NA
8939	0.32014	-1.6432	0.043848	1.358	down	uniquelyDA	1010.47	723.485		NA	NA	NA	NA	NA	NA	NA	NA
8959	0.30199	-1.7274	0.023678	1.6257	down	uniquelyDA	1009.86	599.497		NA	NA	NA	NA	NA	NA	NA	NA
9066	0.45576	-1.1337	0.024042	1.619	down	uniquelyDA	1012.51	714.505		NA	NA	NA	NA	NA	NA	NA	NA
9130	0.32523	-1.6205	0.022782	1.6424	down	uniquelyDA	1016.53	352.299		NA	NA	NA	NA	NA	NA	NA	NA
9150	0.20487	-2.2872	0.014166	1.8488	down	shared by all	1015.36	630.522		NA	NA	NA	NA	NA	NA	NA	NA
9496	0.39835	-1.3279	0.048578	1.3136	down	uniquelyDA	1028.81	599.498		NA	NA	NA	NA	NA	NA	NA	NA
9658	0.19805	-2.3361	0.021994	1.6577	down	uniquelyDA	1034.31	380.341		NA	NA	NA	NA	NA	NA	NA	NA
9808	0.44271	-1.1756	0.045632	1.3407	down	uniquelyDA	1039.98	574.403		NA	NA	NA	NA	NA	NA	NA	NA
9945	0.31164	-1.682	0.015756	1.8025	down	shared with mp	1044.89	121.089		NA	NA	NA	NA	NA	NA	NA	NA
9989	0.24037	-2.0567	0.0084876	2.0712	down	uniquelyDA	1046.25	599.498		NA	NA	NA	NA	NA	NA	NA	NA
10152	0.16905	-2.5645	0.024369	1.6132	down	uniquelyDA	1051.02	786.653		NA	NA	NA	NA	NA	NA	NA	NA
10320	0.21861	-2.1935	0.024387	1.6128	down	uniquelyDA	1056.94	450.303		NA	NA	NA	NA	NA	NA	NA	NA
10979	0.22253	-2.1679	0.022979	1.6387	down	uniquelyDA	1079.45	307.287		NA	NA	NA	NA	NA	NA	NA	NA
11104	0.46746	-1.0971	0.045421	1.3427	down	uniquelyDA	905.39	636.373		NA	NA	NA	NA	NA	NA	NA	NA
5930	0.45407	-1.139	0.021114	1.6754	down	shared with mp	660.17	340.131		Organic compounds	Organic oxygen compounds	Organooxygen compounds	Ethers	Alkyl aryl ethers	Alkaloids	Pseudoalkaloids	Pyridine alkaloids
7043	0.47762	-1.0661	0.024701	1.6073	down	uniquelyDA	905.38	671.41		Organic compounds	Organic oxygen compounds	Organooxygen compounds	Carbohydrates and carbohydrate conjugates	Aminoglycosides	Fatty acids	Sphingolipids	Erythromycins
6749	0.43293	-1.2078	0.0489	1.3107	down	uniquelyDA	876.27	528.294		Organic compounds	Lipids and lipid-like molecules	Steroids and steroid derivatives	Steroidal glycosides	Steroidal glycosides	Terpenoids	Steroids	Cholane steroids
6077	0.42619	-1.2304	0.01695	1.7708	down	uniquelyDA	744.8	369.197		Organic compounds	Organoheterocyclic compounds	Diazines	Pyrimidines and pyrimidine derivatives	Aminopyrimidines and derivatives	Alkaloids	Tryptophan alkaloids	Carboline alkaloids
5126	0.49688	-1.009	0.043593	1.3606	down	uniquelyDA	270.1	493.141		Organic compounds	Benzenoids	Benzene and substituted derivatives	Benzoic acids and derivatives	Benzoic acid esters	Alkaloids	Tyrosine alkaloids	Isoquinoline alkaloids
3657	2.2578	1.1749	0.016029	1.7951	up	uniquelyDA	62.41	359.034		Organic compounds	Organic oxygen compounds	Organooxygen compounds	Carbohydrates and carbohydrate conjugates	Alkylglucosinolates	Amino acids and Peptides	Amino acid glycosides	Glucosinolates
3790	2.2202	1.1507	0.01548	1.8102	up	uniquelyDA	61.81	359.034		Organic compounds	Organic oxygen compounds	Organooxygen compounds	Carbohydrates and carbohydrate conjugates	Alkylglucosinolates	Amino acids and Peptides	Amino acid glycosides	Glucosinolates
10043	4.2129	2.0748	0.0015572	2.8077	up	shared with mp	1048.12	319.285		Organic compounds	Lipids and lipid-like molecules	Fatty Acyls	Fatty amides	N-acyl amines	Fatty acids	Fatty amides	N-acyl amines
6070	3.6257	1.8583	0.030999	1.5087	up	uniquelyDA	742.66	358.308		Organic compounds	Lipids and lipid-like molecules	Glycerolipids	Monoradylglycerols	1-monoacylglycerols	Fatty acids	Glycerolipids	Monoacylglycerols
6747	3.7096	1.8913	0.044317	1.3534	up	uniquelyDA	877.64	556.292		Organic compounds	Lipids and lipid-like molecules	Glycerolipids	Glycosylglycerols	Glycosylglycerols	Fatty acids	Glycerolipids	Glycosylmonoacylglycerols
6760	5.5471	2.4717	0.03153	1.5013	up	uniquelyDA	877.32	330.277		Organic compounds	Lipids and lipid-like molecules	Glycerolipids	Monoradylglycerols	1-monoacylglycerols	Fatty acids	Glycerolipids	Monoacylglycerols
7647	2.066	1.0468	0.02246	1.6486	up	shared with mp	953.48	424.282		Organic compounds	Lipids and lipid-like molecules	Glycerolipids	Glycosylglycerols	Glycosylglycerols	Fatty acids	Glycerolipids	Monoacylglycerols
164	3.0448	1.6063	0.016389	1.7854	up	uniquelyDA	60.12	782.21		NA	NA	NA	NA	NA	NA	NA	NA
203	2.1067	1.075	0.0034581	2.4612	up	shared with mp	62.06	412.115		NA	NA	NA	NA	NA	NA	NA	NA
334	2.2434	1.1657	0.013488	1.87	up	uniquelyDA	130.41	278.093		NA	NA	NA	NA	NA	NA	NA	NA
377	2.3123	1.2093	0.043915	1.3574	up	uniquelyDA	187.59	295.055		NA	NA	NA	NA	NA	NA	NA	NA
510	2.491	1.3167	0.0097878	2.0093	up	shared with mp	223.85	347.151		NA	NA	NA	NA	NA	NA	NA	NA
831	2.4946	1.3188	0.0019127	2.7183	up	uniquelyDA	276.82	261.991		NA	NA	NA	NA	NA	NA	NA	NA
1344	2.0432	1.0308	0.027328	1.5634	up	uniquelyDA	685.47	523.236		NA	NA	NA	NA	NA	NA	NA	NA
1381	2.0333	1.0238	0.047204	1.326	up	uniquelyDA	716.25	557.223		NA	NA	NA	NA	NA	NA	NA	NA
1723	2.3216	1.2151	0.039681	1.4014	up	uniquelyDA	887.95	615.339		NA	NA	NA	NA	NA	NA	NA	NA
2816	2.0894	1.0631	0.03645	1.4383	up	uniquelyDA	53.84	675.773		NA	NA	NA	NA	NA	NA	NA	NA
2873	4.5889	2.1982	0.029137	1.5356	up	shared with mp	55.19	797.702		NA	NA	NA	NA	NA	NA	NA	NA
2874	3.332	1.7364	0.014533	1.8376	up	uniquelyDA	55.27	729.715		NA	NA	NA	NA	NA	NA	NA	NA
2881	6.3236	2.6608	0.0046971	2.3282	up	uniquelyDA	55.27	839.691		NA	NA	NA	NA	NA	NA	NA	NA
2903	2.2032	1.1396	0.043148	1.365	up	uniquelyDA	53.81	607.785		NA	NA	NA	NA	NA	NA	NA	NA
3025	2.1362	1.095	0.031211	1.5057	up	uniquelyDA	55.19	205.879		NA	NA	NA	NA	NA	NA	NA	NA
3033	2.6956	1.4306	0.029516	1.5299	up	uniquelyDA	55.24	289.84		NA	NA	NA	NA	NA	NA	NA	NA
3041	2.1033	1.0726	0.043466	1.3618	up	uniquelyDA	55.49	619.755		NA	NA	NA	NA	NA	NA	NA	NA
3121	2.1447	1.1007	0.018356	1.7362	up	uniquelyDA	55.4	551.767		NA	NA	NA	NA	NA	NA	NA	NA
3158	6.593	2.7209	0.0025552	2.5926	up	uniquelyDA	55.56	731.716		NA	NA	NA	NA	NA	NA	NA	NA
3411	2.0509	1.0362	0.032115	1.4933	up	uniquelyDA	58.25	454.005		NA	NA	NA	NA	NA	NA	NA	NA
3445	2.1114	1.0782	0.000827	3.0827	up	uniquelyDA	58.72	842.14		NA	NA	NA	NA	NA	NA	NA	NA
3457	3.0305	1.5995	0.017327	1.7613	up	shared with mp	59.7	219.111		NA	NA	NA	NA	NA	NA	NA	NA
3496	2.0904	1.0638	0.0048159	2.3173	up	shared with mp	59.03	309.108		NA	NA	NA	NA	NA	NA	NA	NA
3551	2.5068	1.3258	0.020627	1.6856	up	uniquelyDA	60.03	440.093		NA	NA	NA	NA	NA	NA	NA	NA
3593	2.035	1.025	0.02355	1.628	up	uniquelyDA	62.54	135.036		NA	NA	NA	NA	NA	NA	NA	NA
3603	3.1278	1.6451	0.012717	1.8956	up	uniquelyDA	62.1	735.093		NA	NA	NA	NA	NA	NA	NA	NA
3605	2.7409	1.4547	0.011861	1.9259	up	uniquelyDA	62.16	718.069		NA	NA	NA	NA	NA	NA	NA	NA
3646	2.2386	1.1626	0.0068002	2.1675	up	shared with mi	62.61	273.085		NA	NA	NA	NA	NA	NA	NA	NA
3653	3.3425	1.7409	0.0070106	2.1542	up	uniquelyDA	62.27	971.187		NA	NA	NA	NA	NA	NA	NA	NA
3731	2.3984	1.2621	0.010675	1.9716	up	shared with mp	62.43	543.145		NA	NA	NA	NA	NA	NA	NA	NA
3762	2.0891	1.0629	0.0060966	2.2149	up	uniquelyDA	61.94	660.094		NA	NA	NA	NA	NA	NA	NA	NA
3789	2.0724	1.0513	0.011067	1.956	up	uniquelyDA	61.81	279.077		NA	NA	NA	NA	NA	NA	NA	NA
3839	3.146	1.6535	0.021433	1.6689	up	shared by all	62.39	255.075		NA	NA	NA	NA	NA	NA	NA	NA
3899	2.3573	1.2371	0.0012951	2.8877	up	uniquelyDA	67.38	396.99		NA	NA	NA	NA	NA	NA	NA	NA
3950	2.3725	1.2464	0.034989	1.4561	up	uniquelyDA	87.13	79.0676		NA	NA	NA	NA	NA	NA	NA	NA
3956	2.2135	1.1463	0.020309	1.6923	up	uniquelyDA	87.14	144.043		NA	NA	NA	NA	NA	NA	NA	NA
3957	2.0811	1.0574	0.030853	1.5107	up	uniquelyDA	86.95	718.068		NA	NA	NA	NA	NA	NA	NA	NA
3984	2.8714	1.5218	0.0034895	2.4572	up	uniquelyDA	87.11	971.187		NA	NA	NA	NA	NA	NA	NA	NA
4031	2.074	1.0524	0.029449	1.5309	up	uniquelyDA	87	735.096		NA	NA	NA	NA	NA	NA	NA	NA
4088	2.1015	1.0714	0.046391	1.3336	up	shared with mp	93.41	204.063		NA	NA	NA	NA	NA	NA	NA	NA
4104	3.8824	1.957	0.037389	1.4273	up	uniquelyDA	101.59	284.271		NA	NA	NA	NA	NA	NA	NA	NA
4126	2.1549	1.1076	0.014467	1.8396	up	shared with mp	133.42	261.067		NA	NA	NA	NA	NA	NA	NA	NA
4436	2.5714	1.3626	0.010551	1.9767	up	uniquelyDA	223.98	330.125		NA	NA	NA	NA	NA	NA	NA	NA
4776	2.5416	1.3458	0.014662	1.8338	up	uniquelyDA	245.57	568.152		NA	NA	NA	NA	NA	NA	NA	NA
5256	2.8162	1.4938	0.0081958	2.0864	up	uniquelyDA	291.59	424.043		NA	NA	NA	NA	NA	NA	NA	NA
5352	3.2469	1.6991	0.020324	1.692	up	uniquelyDA	307.91	424.043		NA	NA	NA	NA	NA	NA	NA	NA
5736	2.1142	1.0801	0.0033839	2.4706	up	shared with mp	461.8	362.097		NA	NA	NA	NA	NA	NA	NA	NA
6051	4.1105	2.0393	0.043793	1.3586	up	uniquelyDA	728.77	358.308		NA	NA	NA	NA	NA	NA	NA	NA
6092	3.532	1.8205	0.036285	1.4403	up	uniquelyDA	755.46	358.308		NA	NA	NA	NA	NA	NA	NA	NA
6430	3.2036	1.6797	0.029678	1.5276	up	uniquelyDA	831.19	277.632		NA	NA	NA	NA	NA	NA	NA	NA
6615	2.2075	1.1424	0.0095378	2.0206	up	uniquelyDA	858.38	639.339		NA	NA	NA	NA	NA	NA	NA	NA
7843	2.7745	1.4722	0.0070924	2.1492	up	uniquelyDA	962.34	424.282		NA	NA	NA	NA	NA	NA	NA	NA
7905	2.3997	1.2629	0.02299	1.6385	up	shared with mp	966.43	232.182		NA	NA	NA	NA	NA	NA	NA	NA
8157	3.0358	1.6021	0.048839	1.3112	up	shared with mp	979.54	365.293		NA	NA	NA	NA	NA	NA	NA	NA
8485	4.1799	2.0635	0.033891	1.4699	up	uniquelyDA	993.07	415.225		NA	NA	NA	NA	NA	NA	NA	NA
8942	2.9334	1.5526	0.012613	1.8992	up	shared with mp	1009.74	317.271		NA	NA	NA	NA	NA	NA	NA	NA
9762	2.9705	1.5707	0.044819	1.3485	up	shared with mp	1038.54	496.412		NA	NA	NA	NA	NA	NA	NA	NA
10047	2.7336	1.4508	0.047434	1.3239	up	shared with mp	1047.87	566.367		NA	NA	NA	NA	NA	NA	NA	NA
10496	3.0112	1.5903	0.047826	1.3203	up	shared with mp	1062.14	592.269		NA	NA	NA	NA	NA	NA	NA	NA
10965	2.5872	1.3714	0.025956	1.5858	up	shared with mp	1079.78	592.27		NA	NA	NA	NA	NA	NA	NA	NA
3595	3.0277	1.5982	0.01685	1.7734	up	uniquelyDA	62.15	638.113		Organic compounds	Nucleosides, nucleotides, and analogues	Purine nucleotides	Purine ribonucleotides	Purine ribonucleoside monophosphates	Carbohydrates	Nucleosides	Purine nucleos(t)ides
5166	2.4073	1.2674	0.0076532	2.1162	up	uniquelyDA	276.32	424.043		Organic compounds	Nucleosides, nucleotides, and analogues	Pyrimidine nucleotides	NA	Pyrimidine nucleotides	Carbohydrates	Nucleosides	Pyrimidine nucleos(t)ides
2404	3.2505	1.7007	0.03065	1.5136	up	shared with mp	1061.57	593.273		Organic compounds	Organic acids and derivatives	Carboxylic acids and derivatives	Amino acids, peptides, and analogues	Alpha amino acids and derivatives	Amino acids and Peptides	Oligopeptides	Cyclic peptides
4931	3.3047	1.7245	0.032484	1.4883	up	shared with mi	259.45	224.068		Organic compounds	Phenylpropanoids and polyketides	Cinnamic acids and derivatives	Hydroxycinnamic acids and derivatives	Coumaric acids and derivatives	Shikimates and Phenylpropanoids	Phenylpropanoids (C6-C3)	Cinnamic acids and derivatives
690	2.0544	1.0387	0.000798	3.098	up	shared with mp	250.93	349.076		Organic compounds	Organic acids and derivatives	Carboxylic acids and derivatives	Amino acids, peptides, and analogues	N-acyl-alpha amino acids	Alkaloids	Pseudoalkaloids	pteridine alkaloids
4146	2.1584	1.11	0.033917	1.4696	up	shared with mi	167.46	327.131		Organic compounds	Organic acids and derivatives	Carboxylic acids and derivatives	Amino acids, peptides, and analogues	Tyrosine and derivatives	Amino acids and Peptides	Small peptides	Dipeptides
6168	6.3381	2.664	0.04565	1.3406	up	uniquelyDA	781.2	539.292		Organic compounds	Organic acids and derivatives	Carboxylic acids and derivatives	Amino acids, peptides, and analogues	Amino acids and derivatives	Alkaloids	Tryptophan alkaloids	Pyridine alkaloids
6744	5.0296	2.3304	0.042917	1.3674	up	uniquelyDA	877.4	573.319		Organic compounds	Organic acids and derivatives	Carboxylic acids and derivatives	Amino acids, peptides, and analogues	Alpha amino acids and derivatives	Polyketides	Tryptophan alkaloids	Depsipeptides

## Sheet: Table S3-c_mp-control
FeatureID	FC	log2.FC.	raw.pval	minusLOG10.p.	RT	m.z	up/down	shared/unique	Name	kingdom_CF	superclass_CF	class_CF	subclass_CF	parent_CF	pathway_NP	superclass_NP	class_NP
8596	0.2799	-1.837	0.017384	1.7598	998.74	394.323	down	shared by all		NA	NA	NA	NA	NA	NA	NA	NA
9150	0.25508	-1.971	0.035367	1.4514	1015.36	630.522	down	shared by all		NA	NA	NA	NA	NA	NA	NA	NA
3839	2.8351	1.5034	0.028418	1.5464	62.39	255.075	up	shared by all		NA	NA	NA	NA	NA	NA	NA	NA
4480	0.22927	-2.1249	0.0012478	2.9038	225.42	162.068	down	shared with mi		NA	NA	NA	NA	NA	NA	NA	NA
4476	0.10767	-3.2153	0.0094465	2.0247	225.74	130.042	down	shared with mi		NA	NA	NA	NA	NA	NA	NA	NA
4458	0.085057	-3.5554	0.000433	3.3638	225.47	684.264	down	shared with mi		NA	NA	NA	NA	NA	NA	NA	NA
4460	0.021552	-5.536	0.001064	2.9731	225.68	701.291	down	shared with mi		NA	NA	NA	NA	NA	NA	NA	NA
9580	5.6754	2.5047	0.0036485	2.4379	1031.63	588.457	up	shared with mi		NA	NA	NA	NA	NA	NA	NA	NA
5836	4.9775	2.3154	0.000956	3.0196	604.63	216.036	up	shared with mi		NA	NA	NA	NA	NA	NA	NA	NA
1244	3.7887	1.9217	0.0023225	2.634	604.45	189.025	up	shared with mi		NA	NA	NA	NA	NA	NA	NA	NA
8740	3.2982	1.7217	0.015907	1.7984	1005.75	148.016	up	shared with mi		NA	NA	NA	NA	NA	NA	NA	NA
534	0.077355	-3.6924	0.0015704	2.804	225.42	359.158	down	shared with mi		Organic compounds	Organic acids and derivatives	Carboxylic acids and derivatives	Amino acids, peptides, and analogues	Amino acids and derivatives	Alkaloids	Pseudoalkaloids	Purine nucleos(t)ides
10043	5.1952	2.3772	0.000208	3.6829	1048.12	319.285	up	shared with pp		Organic compounds	Lipids and lipid-like molecules	Fatty Acyls	Fatty amides	N-acyl amines	Fatty acids	Fatty amides	N-acyl amines
7647	2.271	1.1834	0.000606	3.2173	953.48	424.282	up	shared with pp		Organic compounds	Lipids and lipid-like molecules	Glycerolipids	Glycosylglycerols	Glycosylglycerols	Fatty acids	Glycerolipids	Monoacylglycerols
1081	0.36372	-1.4591	0.003458	2.4612	443.21	372.121	down	shared with pp		NA	NA	NA	NA	NA	NA	NA	NA
1799	0.3312	-1.5942	0.011135	1.9533	911.05	717.576	down	shared with pp		NA	NA	NA	NA	NA	NA	NA	NA
615	0.27343	-1.8708	0.0012086	2.9177	236.08	248.079	down	shared with pp		NA	NA	NA	NA	NA	NA	NA	NA
2389	0.16452	-2.6037	2.96e-06	5.5287	1060.32	298.241	down	shared with pp		NA	NA	NA	NA	NA	NA	NA	NA
9945	0.13356	-2.9044	3.62e-05	4.4419	1044.89	121.089	down	shared with pp		NA	NA	NA	NA	NA	NA	NA	NA
4182	0.091845	-3.4447	0.031215	1.5056	181.43	307.126	down	shared with pp		NA	NA	NA	NA	NA	NA	NA	NA
2873	4.651	2.2175	0.028975	1.538	55.19	797.702	up	shared with pp		NA	NA	NA	NA	NA	NA	NA	NA
3457	3.804	1.9275	0.0044421	2.3524	59.7	219.111	up	shared with pp		NA	NA	NA	NA	NA	NA	NA	NA
10496	3.7425	1.904	0.0058171	2.2353	1062.14	592.269	up	shared with pp		NA	NA	NA	NA	NA	NA	NA	NA
7905	3.2349	1.6937	0.02718	1.5658	966.43	232.182	up	shared with pp		NA	NA	NA	NA	NA	NA	NA	NA
8942	3.2228	1.6883	0.0055919	2.2524	1009.74	317.271	up	shared with pp		NA	NA	NA	NA	NA	NA	NA	NA
10047	3.1894	1.6733	0.030572	1.5147	1047.87	566.367	up	shared with pp		NA	NA	NA	NA	NA	NA	NA	NA
8157	3.021	1.595	0.000315	3.5021	979.54	365.293	up	shared with pp		NA	NA	NA	NA	NA	NA	NA	NA
5736	2.9595	1.5654	0.000495	3.3056	461.8	362.097	up	shared with pp		NA	NA	NA	NA	NA	NA	NA	NA
4088	2.6658	1.4146	0.011025	1.9576	93.41	204.063	up	shared with pp		NA	NA	NA	NA	NA	NA	NA	NA
203	2.552	1.3516	0.0017646	2.7534	62.06	412.115	up	shared with pp		NA	NA	NA	NA	NA	NA	NA	NA
9762	2.2636	1.1786	0.019842	1.7024	1038.54	496.412	up	shared with pp		NA	NA	NA	NA	NA	NA	NA	NA
3496	2.2246	1.1535	0.0047572	2.3226	59.03	309.108	up	shared with pp		NA	NA	NA	NA	NA	NA	NA	NA
510	2.2061	1.1415	0.0069521	2.1579	223.85	347.151	up	shared with pp		NA	NA	NA	NA	NA	NA	NA	NA
3731	2.054	1.0385	0.010186	1.992	62.43	543.145	up	shared with pp		NA	NA	NA	NA	NA	NA	NA	NA
10965	2.0446	1.0318	0.043105	1.3655	1079.78	592.27	up	shared with pp		NA	NA	NA	NA	NA	NA	NA	NA
4126	2.0121	1.0087	0.030328	1.5182	133.42	261.067	up	shared with pp		NA	NA	NA	NA	NA	NA	NA	NA
2404	3.861	1.949	0.0044532	2.3513	1061.57	593.273	up	shared with pp		Organic compounds	Organic acids and derivatives	Carboxylic acids and derivatives	Amino acids, peptides, and analogues	Alpha amino acids and derivatives	Amino acids and Peptides	Oligopeptides	Cyclic peptides
5930	0.31131	-1.6836	0.0034614	2.4608	660.17	340.131	down	shared with pp		Organic compounds	Organic oxygen compounds	Organooxygen compounds	Ethers	Alkyl aryl ethers	Alkaloids	Pseudoalkaloids	Pyridine alkaloids
690	4.1967	2.0693	0.0011415	2.9425	250.93	349.076	up	shared with pp		Organic compounds	Organic acids and derivatives	Carboxylic acids and derivatives	Amino acids, peptides, and analogues	N-acyl-alpha amino acids	Alkaloids	Pseudoalkaloids	pteridine alkaloids
4145	0.44157	-1.1793	0.017125	1.7664	168.68	384.099	down	uniquelyDA	4-Hydroxyglucobrassicin, desulfo fragment	Organic compounds	Organic oxygen compounds	Organooxygen compounds	Carbohydrates and carbohydrate conjugates	Cyanogenic glycosides	Amino acids and Peptides	Amino acid glycosides	Glucosinolates
4047	2.9801	1.5754	0.000177	3.752	88.04	267.096	up	uniquelyDA	Adenosine	Organic compounds	Organic oxygen compounds	Organooxygen compounds	Carbohydrates and carbohydrate conjugates	Carbohydrates and carbohydrate conjugates	Carbohydrates	NA	NA
174	3.6008	1.8483	0.000247	3.6069	60.68	111.043	up	uniquelyDA	Cytosine	NA	NA	NA	NA	NA	NA	NA	NA
5782	3.3196	1.731	0.000536	3.2712	544.82	175.063	up	uniquelyDA	degradation product of 4MeOI3M, 4-Methoxyindole-3-methanol	Organic compounds	Organoheterocyclic compounds	Quinolines and derivatives	NA	Quinolines and derivatives	Alkaloids	Anthranilic acid alkaloids	Quinoline alkaloids
355	0.44126	-1.1803	0.021705	1.6634	168.54	368.103	down	uniquelyDA	Desulfo-Glucobrassicin	Organic compounds	Organic oxygen compounds	Organooxygen compounds	Carbohydrates and carbohydrate conjugates	Hexoses	Amino acids and Peptides	Amino acid glycosides	Glucosinolates
3691	0.33848	-1.5628	0.0010707	2.9703	60.99	246.035	down	uniquelyDA	L(+)-Ascorbic acid, unkown adduct	NA	NA	NA	NA	NA	NA	NA	NA
3879	0.27441	-1.8656	0.000275	3.5603	65.66	246.035	down	uniquelyDA	L(+)-Ascorbic acid, unkown adduct	NA	NA	NA	NA	NA	NA	NA	NA
6790	15.292	3.9347	0.000359	3.4449	878.99	292.203	up	uniquelyDA	OPDA (cis-12-Oxo-phytodienoic acid)	Organic compounds	Organic oxygen compounds	Organooxygen compounds	Carbonyl compounds	Cyclohexenones	Terpenoids	Steroids	Androstane steroids
360	0.44421	-1.1707	0.023781	1.6238	169.71	464.057	down	uniquelyDA		Organic compounds	Organic oxygen compounds	Organooxygen compounds	Carbohydrates and carbohydrate conjugates	Alkylglucosinolates	Amino acids and Peptides	Amino acid glycosides	Glucosinolates
1068	2.5704	1.362	0.011614	1.935	422.86	369.088	up	uniquelyDA		Organic compounds	Organic oxygen compounds	Organooxygen compounds	Carbohydrates and carbohydrate conjugates	Hexoses	Amino acids and Peptides	Amino acid glycosides	Glucosinolates
5773	2.1091	1.0766	0.005147	2.2884	511.21	380.104	up	uniquelyDA		Organic compounds	Organic oxygen compounds	Organooxygen compounds	Carbohydrates and carbohydrate conjugates	Hexoses	Alkaloids	Amino acid glycosides	Pyridine alkaloids
5299	0.40032	-1.3208	0.0029075	2.5365	300.62	539.237	down	uniquelyDA		Organic compounds	Organic oxygen compounds	Organooxygen compounds	Carbohydrates and carbohydrate conjugates	Aminoglycosides	Terpenoids	Aminosugars and aminoglycosides	Aminosugars
5618	0.34472	-1.5365	0.0062204	2.2062	386.03	234.089	down	uniquelyDA		Organic compounds	Benzenoids	Benzene and substituted derivatives	Acetophenones	Acetophenones	Polyketides	Aromatic polyketides	Simple phenolic acids
5619	0.33952	-1.5585	0.0028409	2.5465	386.09	340.131	down	uniquelyDA		Organic compounds	Benzenoids	Phenol ethers	NA	Phenol ethers	Shikimates and Phenylpropanoids	Coumarins	Neolignans
8780	10.055	3.3299	0.044143	1.3551	1008.19	422.267	up	uniquelyDA		Organic compounds	Organic oxygen compounds	Organooxygen compounds	Carbohydrates and carbohydrate conjugates	O-glycosyl compounds	Terpenoids	Diterpenoids	Labdane diterpenoids
6955	7.1521	2.8384	8.16e-06	5.0883	895.25	347.246	up	uniquelyDA		Organic compounds	Organic acids and derivatives	Carboxylic acids and derivatives	Amino acids, peptides, and analogues	Amino acids and derivatives	Alkaloids	Diterpenoids	Prostaglandins
6360	3.0053	1.5875	0.00026	3.5842	826.3	368.256	up	uniquelyDA		Organic compounds	Lipids and lipid-like molecules	Fatty Acyls	Eicosanoids	Prostaglandins and related compounds	Fatty acids	Eicosanoids	Prostaglandins
6758	2.6661	1.4148	0.00025	3.6014	876.77	350.245	up	uniquelyDA		Organic compounds	Lipids and lipid-like molecules	Fatty Acyls	Eicosanoids	Eicosanoids	Fatty acids	Eicosanoids	Monoacylglycerols
7015	5.3233	2.4123	6.74e-07	6.1713	903.59	278.224	up	uniquelyDA		Organic compounds	Lipids and lipid-like molecules	Fatty Acyls	Lineolic acids and derivatives	Lineolic acids and derivatives	Fatty acids	Fatty Acids and Conjugates	Unsaturated fatty acids
10619	3.525	1.8176	0.022801	1.6421	1067.61	243.183	up	uniquelyDA		Organic compounds	Organic acids and derivatives	Carboxylic acids and derivatives	Amino acids, peptides, and analogues	Amino acids	Fatty acids	Fatty Acids and Conjugates	Oxo fatty acids
10634	2.2856	1.1926	0.016252	1.7891	1067.17	227.189	up	uniquelyDA		Organic compounds	Organic acids and derivatives	Carboxylic acids and derivatives	Amino acids, peptides, and analogues	Amino acids	Fatty acids	Fatty Acids and Conjugates	Amino fatty acids
8390	11.965	3.5807	2.04e-05	4.6896	991.26	302.245	up	uniquelyDA		Organic compounds	Lipids and lipid-like molecules	Glycerolipids	Monoradylglycerols	Monoacylglycerols	Fatty acids	Fatty acyls	Monoacylglycerols
7446	8.791	3.136	1.33e-05	4.8765	938	413.26	up	uniquelyDA		Organic compounds	Lipids and lipid-like molecules	Fatty Acyls	Fatty amides	N-acyl amines	Fatty acids	Fatty amides	N-acyl amines
6954	7.9608	2.9929	4.71e-07	6.3271	895.28	411.244	up	uniquelyDA		Organic compounds	Lipids and lipid-like molecules	Fatty Acyls	Fatty amides	Fatty amides	Fatty acids	Fatty amides	N-acyl amines
7449	7.228	2.8536	5.53e-06	5.2573	938.05	349.261	up	uniquelyDA		Organic compounds	Organic acids and derivatives	Carboxylic acids and derivatives	Amino acids, peptides, and analogues	Alpha amino acids and derivatives	Fatty acids	Fatty amides	N-acyl amines
1997	5.4162	2.4373	1.48e-05	4.831	971.88	389.26	up	uniquelyDA		Organic compounds	Lipids and lipid-like molecules	NA	NA	Lipids and lipid-like molecules	Fatty acids	Fatty amides	N-acyl amines
10514	3.6549	1.8698	0.04155	1.3814	1062.68	567.422	up	uniquelyDA		Organic compounds	Organic acids and derivatives	Organic phosphoric acids and derivatives	Phosphate esters	Phosphoethanolamines	Fatty acids	Fatty amides	N-acyl amines
10610	3.4839	1.8007	0.034677	1.46	1067.64	225.172	up	uniquelyDA		Organic compounds	Organic acids and derivatives	Carboxylic acids and derivatives	Amino acids, peptides, and analogues	Amino acids and derivatives	Fatty acids	Fatty amides	Primary amides
9441	2.8486	1.5103	0.000992	3.0037	1028.36	325.293	up	uniquelyDA		Organic compounds	Lipids and lipid-like molecules	Fatty Acyls	Fatty amides	N-acyl amines	Fatty acids	Fatty amides	N-acyl ethanolamines (endocannabinoids)
8089	2.452	1.2939	0.000227	3.6448	978.05	323.282	up	uniquelyDA		Organic compounds	Lipids and lipid-like molecules	Fatty Acyls	Fatty amides	N-acyl amines	Fatty acids	Fatty amides	N-acyl ethanolamines (endocannabinoids)
6355	2.3868	1.2551	0.0012457	2.9046	824.92	321.266	up	uniquelyDA		Organic compounds	Organic acids and derivatives	Carboxylic acids and derivatives	Amino acids, peptides, and analogues	Amino acids, peptides, and analogues	Fatty acids	Fatty amides	N-acyl ethanolamines (endocannabinoids)
10382	29.268	4.8713	4.22e-08	7.3748	1060.64	330.277	up	uniquelyDA		Organic compounds	Lipids and lipid-like molecules	Glycerolipids	Monoradylglycerols	Monoradylglycerols	Fatty acids	Glycerolipids	Monoacylglycerols
7877	6.8913	2.7848	0.045678	1.3403	963.94	324.23	up	uniquelyDA		Organic compounds	Lipids and lipid-like molecules	Glycerolipids	Monoradylglycerols	1-monoacylglycerols	Fatty acids	Glycerolipids	Monoacylglycerols
6481	2.8031	1.487	0.041808	1.3787	838.65	556.292	up	uniquelyDA		Organic compounds	Lipids and lipid-like molecules	Glycerolipids	Glycosylglycerols	Glycosylglycerols	Fatty acids	Glycerolipids	Glycosylmonoacylglycerols
6714	2.3094	1.2075	0.00017	3.7684	873.32	516.33	up	uniquelyDA		Organic compounds	Lipids and lipid-like molecules	Glycerolipids	Glycosylglycerols	Glycosylglycerols	Fatty acids	Glycerolipids	Glycosylmonoacylglycerols
6603	2.0283	1.0203	0.0093349	2.0299	859.23	678.384	up	uniquelyDA		Organic compounds	Lipids and lipid-like molecules	Glycerolipids	Glycosylglycerols	Glycosylglycerols	Fatty acids	Glycerolipids	Glycosylmonoacylglycerols
7054	2.0029	1.0021	0.013784	1.8606	907.2	356.291	up	uniquelyDA		Organic compounds	Lipids and lipid-like molecules	Glycerolipids	Monoradylglycerols	Monoacylglycerols	Fatty acids	Glycerolipids	Monoacylglycerols
9858	2.8471	1.5095	0.0028981	2.5379	1042.6	672.472	up	uniquelyDA		Organic compounds	Lipids and lipid-like molecules	Glycerophospholipids	Glycerophosphates	1,2-diacylglycerol-3-phosphates	Fatty acids	Glycerophospholipids	Glycerophosphates
6910	3.1773	1.6678	0.000473	3.325	889.87	292.202	up	uniquelyDA		Organic compounds	Organoheterocyclic compounds	Azoles	NA	Azoles	Alkaloids	Histidine alkaloids	Imidazole alkaloids
4831	0.30044	-1.7349	0.027361	1.5629	251.54	326.115	down	uniquelyDA		Organic compounds	Organoheterocyclic compounds	Benzopyrans	1-benzopyrans	1-benzopyrans	Shikimates and Phenylpropanoids	Isoflavonoids	Rotenoids
5868	0.48828	-1.0342	0.010158	1.9932	623.36	516.164	down	uniquelyDA		Organic compounds	Lignans, neolignans and related compounds	Lignan glycosides	NA	Lignan glycosides	Shikimates and Phenylpropanoids	Lignans	Neolignans
5457	0.4615	-1.1156	0.020209	1.6944	329.72	522.211	down	uniquelyDA		Organic compounds	Lignans, neolignans and related compounds	Lignan glycosides	NA	Lignan glycosides	Shikimates and Phenylpropanoids	Lignans	Arylnaphthalene and aryltetralin lignans
5017	0.41108	-1.2825	0.0021881	2.6599	262.84	358.141	down	uniquelyDA		Organic compounds	Lignans, neolignans and related compounds	NA	NA	Lignans, neolignans and related compounds	Shikimates and Phenylpropanoids	Lignans	Angucyclines
5623	0.39778	-1.3299	3.35e-05	4.4751	386.38	358.141	down	uniquelyDA		Organic compounds	Lignans, neolignans and related compounds	Furanoid lignans	Furofuran lignans	Furofuran lignans	Shikimates and Phenylpropanoids	Lignans	Furofuranoid lignans
4837	0.37396	-1.419	0.04382	1.3583	251.27	488.169	down	uniquelyDA		Organic compounds	Lignans, neolignans and related compounds	NA	NA	Lignans, neolignans and related compounds	Shikimates and Phenylpropanoids	Lignans	Neolignans
5008	0.35302	-1.5022	0.000178	3.7498	262.11	340.13	down	uniquelyDA		Organic compounds	Benzenoids	Phenols	Methoxyphenols	Methoxyphenols	Shikimates and Phenylpropanoids	Lignans	Neolignans
1049	0.27558	-1.8594	0.0065675	2.1826	408.67	567.232	down	uniquelyDA		Organic compounds	Lipids and lipid-like molecules	Fatty Acyls	Fatty acyl glycosides	Alkyl glycosides	Alkaloids	Lignans	Isoquinoline alkaloids
5637	0.22829	-2.1311	0.0035087	2.4549	386.04	537.222	down	uniquelyDA		Organic compounds	Lignans, neolignans and related compounds	NA	NA	Lignans, neolignans and related compounds	Alkaloids	Lignans	Neolignans
5666	0.29518	-1.7603	0.0030343	2.5179	407.7	264.099	down	uniquelyDA		Organic compounds	Benzenoids	Benzene and substituted derivatives	NA	Benzene and substituted derivatives	Polyketides	Linear polyketides	Open-chain polyketides
6104	8.9208	3.1572	2.34e-07	6.6317	758.04	324.193	up	uniquelyDA		Organic compounds	Lipids and lipid-like molecules	NA	NA	Lipids and lipid-like molecules	Polyketides	Linear polyketides	Open-chain polyketides
7826	4.8053	2.2646	0.000198	3.7031	963.73	482.361	up	uniquelyDA		Organic compounds	Lipids and lipid-like molecules	Fatty Acyls	NA	Fatty Acyls	Fatty acids	Linear polyketides	Open-chain polyketides
7025	2.1359	1.0948	0.001186	2.9259	903.06	422.266	up	uniquelyDA		Organic compounds	Lipids and lipid-like molecules	Fatty Acyls	Fatty alcohols	Fatty alcohols	Polyketides	Linear polyketides	Open-chain polyketides
5867	0.49957	-1.0013	0.033565	1.4741	624.86	192.078	down	uniquelyDA		NA	NA	NA	NA	NA	NA	NA	NA
4643	0.49854	-1.0042	0.016933	1.7713	234.74	178.063	down	uniquelyDA		NA	NA	NA	NA	NA	NA	NA	NA
4147	0.49534	-1.0135	0.040693	1.3905	168.47	464.051	down	uniquelyDA		NA	NA	NA	NA	NA	NA	NA	NA
6407	0.49528	-1.0137	0.026637	1.5745	828.18	475.268	down	uniquelyDA		NA	NA	NA	NA	NA	NA	NA	NA
614	0.49429	-1.0166	7.42e-05	4.1297	235.94	585.676	down	uniquelyDA		NA	NA	NA	NA	NA	NA	NA	NA
4329	0.49299	-1.0204	0.026723	1.5731	212.99	345.036	down	uniquelyDA		NA	NA	NA	NA	NA	NA	NA	NA
2067	0.48707	-1.0378	0.048635	1.313	989.61	680.551	down	uniquelyDA		NA	NA	NA	NA	NA	NA	NA	NA
4114	0.48382	-1.0475	0.038898	1.4101	107.06	131.095	down	uniquelyDA		NA	NA	NA	NA	NA	NA	NA	NA
4727	0.48185	-1.0534	0.0078865	2.1031	241.21	212.105	down	uniquelyDA		NA	NA	NA	NA	NA	NA	NA	NA
3881	0.48023	-1.0582	0.0025312	2.5967	65.62	276.025	down	uniquelyDA		NA	NA	NA	NA	NA	NA	NA	NA
601	0.47828	-1.0641	0.014603	1.8355	235.56	248.104	down	uniquelyDA		NA	NA	NA	NA	NA	NA	NA	NA
5018	0.47758	-1.0662	0.0036238	2.4408	264.01	186.071	down	uniquelyDA		NA	NA	NA	NA	NA	NA	NA	NA
5636	0.47561	-1.0722	0.025235	1.598	386.09	188.084	down	uniquelyDA		NA	NA	NA	NA	NA	NA	NA	NA
4994	0.47509	-1.0737	0.005944	2.2259	263.04	720.204	down	uniquelyDA		NA	NA	NA	NA	NA	NA	NA	NA
3277	0.47445	-1.0757	0.018189	1.7402	56.93	295.059	down	uniquelyDA		NA	NA	NA	NA	NA	NA	NA	NA
946	0.47286	-1.0805	0.014162	1.8489	329.81	560.156	down	uniquelyDA		NA	NA	NA	NA	NA	NA	NA	NA
5016	0.47264	-1.0812	0.0042261	2.3741	263.49	322.12	down	uniquelyDA		NA	NA	NA	NA	NA	NA	NA	NA
775	0.47018	-1.0887	0.0053431	2.2722	263.06	720.194	down	uniquelyDA		NA	NA	NA	NA	NA	NA	NA	NA
11066	0.46398	-1.1079	0.02462	1.6087	831.1	539.297	down	uniquelyDA		NA	NA	NA	NA	NA	NA	NA	NA
6222	0.46151	-1.1156	0.041442	1.3826	802.39	449.254	down	uniquelyDA		NA	NA	NA	NA	NA	NA	NA	NA
4537	0.45445	-1.1378	0.034277	1.465	231.64	309.124	down	uniquelyDA		NA	NA	NA	NA	NA	NA	NA	NA
4072	0.4522	-1.145	0.0061754	2.2093	91.16	238.069	down	uniquelyDA		NA	NA	NA	NA	NA	NA	NA	NA
867	0.45213	-1.1452	0.014067	1.8518	301.03	540.243	down	uniquelyDA		NA	NA	NA	NA	NA	NA	NA	NA
1035	0.45073	-1.1497	0.0046706	2.3306	386.85	357.133	down	uniquelyDA		NA	NA	NA	NA	NA	NA	NA	NA
5101	0.44619	-1.1643	0.002451	2.6107	269.81	264.099	down	uniquelyDA		NA	NA	NA	NA	NA	NA	NA	NA
803	0.43805	-1.1908	0.0053431	2.2722	269.82	729.285	down	uniquelyDA		NA	NA	NA	NA	NA	NA	NA	NA
5891	0.43649	-1.196	0.032336	1.4903	636.88	290.105	down	uniquelyDA		NA	NA	NA	NA	NA	NA	NA	NA
3860	0.43557	-1.199	0.0027073	2.5675	62.67	320.074	down	uniquelyDA		NA	NA	NA	NA	NA	NA	NA	NA
5461	0.43518	-1.2003	0.02409	1.6182	329.82	539.237	down	uniquelyDA		Organic compounds	Organic oxygen compounds	Organooxygen compounds	Carbohydrates and carbohydrate conjugates	Aminoglycosides	Polyketides	NA	NA
3236	0.4314	-1.2129	0.0032516	2.4879	56.7	308.987	down	uniquelyDA		NA	NA	NA	NA	NA	NA	NA	NA
3623	0.42601	-1.231	0.025768	1.5889	62.82	355.147	down	uniquelyDA		NA	NA	NA	NA	NA	NA	NA	NA
10522	0.42174	-1.2456	0.025566	1.5923	1062.98	174.116	down	uniquelyDA		NA	NA	NA	NA	NA	NA	NA	NA
6654	0.42024	-1.2507	0.03596	1.4442	865.46	298.054	down	uniquelyDA		NA	NA	NA	NA	NA	NA	NA	NA
1305	0.42017	-1.2509	0.01564	1.8058	657.73	315.1	down	uniquelyDA		NA	NA	NA	NA	NA	NA	NA	NA
6232	0.41975	-1.2524	0.027805	1.5559	805.19	491.301	down	uniquelyDA		NA	NA	NA	NA	NA	NA	NA	NA
926	0.41905	-1.2548	0.043758	1.3589	323.55	121.074	down	uniquelyDA		NA	NA	NA	NA	NA	NA	NA	NA
5631	0.41327	-1.2748	0.0010427	2.9818	385.96	179.079	down	uniquelyDA		NA	NA	NA	NA	NA	NA	NA	NA
4333	0.41315	-1.2753	0.019875	1.7017	213.63	226.084	down	uniquelyDA		NA	NA	NA	NA	NA	NA	NA	NA
4549	0.41217	-1.2787	0.000102	3.9919	233.28	538.206	down	uniquelyDA		NA	NA	NA	NA	NA	NA	NA	NA
5118	0.41182	-1.2799	0.01719	1.7647	270.7	299.08	down	uniquelyDA		NA	NA	NA	NA	NA	NA	NA	NA
5003	0.40934	-1.2886	0.001356	2.8677	263.06	234.089	down	uniquelyDA		NA	NA	NA	NA	NA	NA	NA	NA
8183	0.40773	-1.2943	0.027277	1.5642	979.91	576.511	down	uniquelyDA		NA	NA	NA	NA	NA	NA	NA	NA
5864	0.40743	-1.2954	0.024966	1.6027	623.44	748.235	down	uniquelyDA		NA	NA	NA	NA	NA	NA	NA	NA
4597	0.40652	-1.2986	0.0062438	2.2046	235.61	744.285	down	uniquelyDA		NA	NA	NA	NA	NA	NA	NA	NA
5100	0.40591	-1.3008	0.010953	1.9605	270.23	712.259	down	uniquelyDA		NA	NA	NA	NA	NA	NA	NA	NA
1021	0.40493	-1.3042	0.000285	3.5454	385.6	576.151	down	uniquelyDA		NA	NA	NA	NA	NA	NA	NA	NA
5413	0.40433	-1.3064	0.035641	1.448	323.56	698.273	down	uniquelyDA		NA	NA	NA	NA	NA	NA	NA	NA
4636	0.40122	-1.3175	0.0066447	2.1775	235.63	384.157	down	uniquelyDA		NA	NA	NA	NA	NA	NA	NA	NA
3274	0.39894	-1.3258	0.000463	3.3347	57.06	262.981	down	uniquelyDA		NA	NA	NA	NA	NA	NA	NA	NA
4726	0.39641	-1.3349	0.000629	3.2013	241.44	396.138	down	uniquelyDA		NA	NA	NA	NA	NA	NA	NA	NA
3598	0.39383	-1.3443	0.0085057	2.0703	62.19	160.038	down	uniquelyDA		NA	NA	NA	NA	NA	NA	NA	NA
5620	0.393	-1.3474	0.010615	1.9741	385.97	520.195	down	uniquelyDA		NA	NA	NA	NA	NA	NA	NA	NA
4649	0.3923	-1.35	0.034688	1.4598	235.32	403.169	down	uniquelyDA		NA	NA	NA	NA	NA	NA	NA	NA
354	0.39227	-1.3501	0.027066	1.5676	168.52	206.051	down	uniquelyDA		NA	NA	NA	NA	NA	NA	NA	NA
4077	0.3895	-1.3603	0.0064579	2.1899	89.84	206.043	down	uniquelyDA		NA	NA	NA	NA	NA	NA	NA	NA
3848	0.38894	-1.3624	0.0011525	2.9383	62.69	206.043	down	uniquelyDA		NA	NA	NA	NA	NA	NA	NA	NA
5577	0.38856	-1.3638	0.023737	1.6246	362.49	290.105	down	uniquelyDA		NA	NA	NA	NA	NA	NA	NA	NA
4631	0.38691	-1.3699	0.012306	1.9099	235.65	160.053	down	uniquelyDA		NA	NA	NA	NA	NA	NA	NA	NA
1048	0.38125	-1.3912	0.022726	1.6435	408.49	588.152	down	uniquelyDA		NA	NA	NA	NA	NA	NA	NA	NA
1080	0.38003	-1.3958	0.029497	1.5302	443.15	534.174	down	uniquelyDA		NA	NA	NA	NA	NA	NA	NA	NA
4999	0.37966	-1.3972	0.000471	3.3272	262.97	520.194	down	uniquelyDA		NA	NA	NA	NA	NA	NA	NA	NA
4619	0.37917	-1.3991	0.0072974	2.1368	235.69	104.063	down	uniquelyDA		NA	NA	NA	NA	NA	NA	NA	NA
5716	0.37881	-1.4005	0.006709	2.1733	442.71	192.078	down	uniquelyDA		NA	NA	NA	NA	NA	NA	NA	NA
5004	0.37737	-1.4059	0.000371	3.4312	262.98	704.23	down	uniquelyDA		NA	NA	NA	NA	NA	NA	NA	NA
6424	0.37338	-1.4213	0.037381	1.4273	831.14	1072.58	down	uniquelyDA		NA	NA	NA	NA	NA	NA	NA	NA
936	0.37205	-1.4264	0.017167	1.7653	323.76	638.252	down	uniquelyDA		NA	NA	NA	NA	NA	NA	NA	NA
1029	0.37096	-1.4306	0.000613	3.2122	385.96	290.094	down	uniquelyDA		NA	NA	NA	NA	NA	NA	NA	NA
5411	0.36933	-1.437	0.011869	1.9256	323.63	668.263	down	uniquelyDA		NA	NA	NA	NA	NA	NA	NA	NA
5006	0.36929	-1.4372	0.00088	3.0556	263	174.068	down	uniquelyDA		NA	NA	NA	NA	NA	NA	NA	NA
4249	0.36923	-1.4374	0.0092636	2.0332	199.65	196.074	down	uniquelyDA		NA	NA	NA	NA	NA	NA	NA	NA
4445	0.36792	-1.4425	0.030661	1.5134	223.74	378.092	down	uniquelyDA		NA	NA	NA	NA	NA	NA	NA	NA
8739	0.36712	-1.4457	0.027356	1.563	1005.68	395.361	down	uniquelyDA		NA	NA	NA	NA	NA	NA	NA	NA
10746	0.36647	-1.4482	0.03238	1.4897	1073.63	260.213	down	uniquelyDA		NA	NA	NA	NA	NA	NA	NA	NA
1899	0.36617	-1.4494	0.045777	1.3393	939.43	296.075	down	uniquelyDA		NA	NA	NA	NA	NA	NA	NA	NA
5621	0.3647	-1.4552	0.0058767	2.2309	386.01	204.079	down	uniquelyDA		NA	NA	NA	NA	NA	NA	NA	NA
929	0.36337	-1.4605	0.012467	1.9042	323.66	1062.37	down	uniquelyDA		NA	NA	NA	NA	NA	NA	NA	NA
9736	0.36127	-1.4688	0.023224	1.6341	1037.2	338.276	down	uniquelyDA		NA	NA	NA	NA	NA	NA	NA	NA
3930	0.36094	-1.4702	0.042674	1.3698	73.53	262.009	down	uniquelyDA		NA	NA	NA	NA	NA	NA	NA	NA
4628	0.35837	-1.4805	0.028501	1.5451	235.89	142.053	down	uniquelyDA		NA	NA	NA	NA	NA	NA	NA	NA
3934	0.35755	-1.4838	0.0043718	2.3593	77.22	246.035	down	uniquelyDA		NA	NA	NA	NA	NA	NA	NA	NA
3959	0.35688	-1.4865	0.000753	3.1233	87.28	220.058	down	uniquelyDA		NA	NA	NA	NA	NA	NA	NA	NA
5664	0.35519	-1.4933	0.0066901	2.1746	408.46	179.079	down	uniquelyDA		NA	NA	NA	NA	NA	NA	NA	NA
535	0.35264	-1.5037	0.000204	3.691	225.43	790.086	down	uniquelyDA		NA	NA	NA	NA	NA	NA	NA	NA
4580	0.35235	-1.5049	0.040353	1.3941	233.57	294.095	down	uniquelyDA		NA	NA	NA	NA	NA	NA	NA	NA
4448	0.35213	-1.5058	0.014307	1.8444	223.74	309.125	down	uniquelyDA		NA	NA	NA	NA	NA	NA	NA	NA
5575	0.35055	-1.5123	0.018823	1.7253	362.65	529.153	down	uniquelyDA		NA	NA	NA	NA	NA	NA	NA	NA
5660	0.34266	-1.5452	0.0054615	2.2627	408.51	234.089	down	uniquelyDA		NA	NA	NA	NA	NA	NA	NA	NA
5418	0.33962	-1.558	0.028032	1.5523	323.66	136.053	down	uniquelyDA		NA	NA	NA	NA	NA	NA	NA	NA
3313	0.33714	-1.5686	0.0025921	2.5863	57.32	279.085	down	uniquelyDA		NA	NA	NA	NA	NA	NA	NA	NA
1025	0.33461	-1.5795	0.0010046	2.998	385.79	270.089	down	uniquelyDA		NA	NA	NA	NA	NA	NA	NA	NA
4030	0.32972	-1.6007	0.000298	3.5251	87.7	188.032	down	uniquelyDA		NA	NA	NA	NA	NA	NA	NA	NA
5628	0.32836	-1.6067	0.0046839	2.3294	386.01	604.147	down	uniquelyDA		NA	NA	NA	NA	NA	NA	NA	NA
3303	0.32622	-1.6161	0.0031122	2.5069	57.38	363.045	down	uniquelyDA		NA	NA	NA	NA	NA	NA	NA	NA
9896	0.32343	-1.6285	0.028615	1.5434	1046.42	481.398	down	uniquelyDA		NA	NA	NA	NA	NA	NA	NA	NA
4768	0.32205	-1.6346	0.019874	1.7017	246.02	321.085	down	uniquelyDA		NA	NA	NA	NA	NA	NA	NA	NA
5661	0.32172	-1.6361	0.0024768	2.6061	408.51	204.078	down	uniquelyDA		NA	NA	NA	NA	NA	NA	NA	NA
4625	0.32051	-1.6416	0.013791	1.8604	235.69	132.058	down	uniquelyDA		NA	NA	NA	NA	NA	NA	NA	NA
864	0.31875	-1.6495	0.038612	1.4133	298.53	359.086	down	uniquelyDA		NA	NA	NA	NA	NA	NA	NA	NA
693	0.31833	-1.6514	0.025748	1.5893	251.62	296.105	down	uniquelyDA		NA	NA	NA	NA	NA	NA	NA	NA
1031	0.31455	-1.6686	0.002635	2.5792	386.07	573.107	down	uniquelyDA		NA	NA	NA	NA	NA	NA	NA	NA
4835	0.31087	-1.6856	0.04887	1.311	251.96	136.053	down	uniquelyDA		NA	NA	NA	NA	NA	NA	NA	NA
9379	0.31071	-1.6863	0.022926	1.6397	1025.49	594.515	down	uniquelyDA		NA	NA	NA	NA	NA	NA	NA	NA
5624	0.3007	-1.7336	0.0036682	2.4355	386.29	620.119	down	uniquelyDA		NA	NA	NA	NA	NA	NA	NA	NA
1415	0.30034	-1.7353	0.013632	1.8654	740.3	589.196	down	uniquelyDA		NA	NA	NA	NA	NA	NA	NA	NA
5626	0.29789	-1.7471	0.0018774	2.7264	385.96	174.068	down	uniquelyDA		NA	NA	NA	NA	NA	NA	NA	NA
5296	0.29715	-1.7507	0.034137	1.4668	300.65	520.194	down	uniquelyDA		NA	NA	NA	NA	NA	NA	NA	NA
3605	0.29061	-1.7829	0.03728	1.4285	62.16	718.069	down	uniquelyDA		NA	NA	NA	NA	NA	NA	NA	NA
4529	0.28579	-1.807	0.0080933	2.0919	230.04	358.126	down	uniquelyDA		NA	NA	NA	NA	NA	NA	NA	NA
3633	0.28449	-1.8135	0.0018977	2.7218	62.29	188.032	down	uniquelyDA		NA	NA	NA	NA	NA	NA	NA	NA
5576	0.27423	-1.8666	0.023603	1.627	362.54	396.099	down	uniquelyDA		NA	NA	NA	NA	NA	NA	NA	NA
4482	0.27218	-1.8773	0.0010781	2.9673	225.34	179.079	down	uniquelyDA		NA	NA	NA	NA	NA	NA	NA	NA
2049	0.27073	-1.885	0.014832	1.8288	984.03	430.061	down	uniquelyDA		NA	NA	NA	NA	NA	NA	NA	NA
4457	0.27051	-1.8863	0.000155	3.81	225.27	342.131	down	uniquelyDA		NA	NA	NA	NA	NA	NA	NA	NA
381	0.26976	-1.8903	0.0085358	2.0688	190.4	448.217	down	uniquelyDA		NA	NA	NA	NA	NA	NA	NA	NA
5000	0.26655	-1.9075	0.000196	3.7075	263.14	537.222	down	uniquelyDA		NA	NA	NA	NA	NA	NA	NA	NA
590	0.2617	-1.934	0.01602	1.7953	234.01	449.153	down	uniquelyDA		NA	NA	NA	NA	NA	NA	NA	NA
10805	0.2613	-1.9362	0.018736	1.7273	1074.46	168.019	down	uniquelyDA		NA	NA	NA	NA	NA	NA	NA	NA
935	0.25739	-1.958	0.023318	1.6323	323.75	1057.42	down	uniquelyDA		NA	NA	NA	NA	NA	NA	NA	NA
5632	0.25534	-1.9695	0.0045938	2.3378	385.7	136.053	down	uniquelyDA		NA	NA	NA	NA	NA	NA	NA	NA
10753	0.25389	-1.9777	0.010786	1.9671	1073.89	186.029	down	uniquelyDA		NA	NA	NA	NA	NA	NA	NA	NA
6091	0.24876	-2.0072	0.024912	1.6036	754.58	240.067	down	uniquelyDA		NA	NA	NA	NA	NA	NA	NA	NA
774	0.24609	-2.0227	0.0073141	2.1358	262.95	803.322	down	uniquelyDA		NA	NA	NA	NA	NA	NA	NA	NA
3318	0.23716	-2.0761	0.02625	1.5809	57.38	379.019	down	uniquelyDA		NA	NA	NA	NA	NA	NA	NA	NA
927	0.23657	-2.0796	0.031367	1.5035	323.59	1598.53	down	uniquelyDA		NA	NA	NA	NA	NA	NA	NA	NA
1652	0.22623	-2.1441	0.018191	1.7401	858.29	264.039	down	uniquelyDA		NA	NA	NA	NA	NA	NA	NA	NA
4045	0.22476	-2.1535	0.000785	3.1052	88.43	288.048	down	uniquelyDA		NA	NA	NA	NA	NA	NA	NA	NA
1030	0.22098	-2.178	0.00073	3.1368	386.06	121.074	down	uniquelyDA		NA	NA	NA	NA	NA	NA	NA	NA
2045	0.21721	-2.2029	0.021601	1.6655	983.68	414.029	down	uniquelyDA		NA	NA	NA	NA	NA	NA	NA	NA
1023	0.21603	-2.2107	0.011383	1.9437	385.68	377.018	down	uniquelyDA		NA	NA	NA	NA	NA	NA	NA	NA
10173	0.21399	-2.2244	0.024155	1.617	1051.59	564.284	down	uniquelyDA		NA	NA	NA	NA	NA	NA	NA	NA
4478	0.21392	-2.2248	0.0013216	2.8789	225.53	348.078	down	uniquelyDA		NA	NA	NA	NA	NA	NA	NA	NA
3302	0.21387	-2.2252	2.71e-05	4.5666	57.42	346.025	down	uniquelyDA		NA	NA	NA	NA	NA	NA	NA	NA
4440	0.20899	-2.2585	0.0071236	2.1473	224.54	310.138	down	uniquelyDA		NA	NA	NA	NA	NA	NA	NA	NA
377	0.20549	-2.2828	0.0087036	2.0603	187.59	295.055	down	uniquelyDA		NA	NA	NA	NA	NA	NA	NA	NA
605	0.20421	-2.2918	0.0051788	2.2858	235.73	1542.49	down	uniquelyDA		NA	NA	NA	NA	NA	NA	NA	NA
1653	0.1996	-2.3248	0.010428	1.9818	858.31	191.041	down	uniquelyDA		NA	NA	NA	NA	NA	NA	NA	NA
10368	0.19074	-2.3903	0.025309	1.5967	1060.96	270.21	down	uniquelyDA		NA	NA	NA	NA	NA	NA	NA	NA
9644	0.18712	-2.418	0.025358	1.5959	1033.91	495.379	down	uniquelyDA		NA	NA	NA	NA	NA	NA	NA	NA
10752	0.18431	-2.4398	0.0083327	2.0792	1074.55	334.25	down	uniquelyDA		NA	NA	NA	NA	NA	NA	NA	NA
4365	0.17424	-2.5208	0.022749	1.643	218.29	360.063	down	uniquelyDA		NA	NA	NA	NA	NA	NA	NA	NA
10745	0.16773	-2.5758	0.0084159	2.0749	1073.98	446.243	down	uniquelyDA		NA	NA	NA	NA	NA	NA	NA	NA
606	0.16729	-2.5796	0.004757	2.3227	235.73	1526.52	down	uniquelyDA		NA	NA	NA	NA	NA	NA	NA	NA
10459	0.16217	-2.6244	1.89e-06	5.724	1062.71	242.179	down	uniquelyDA		NA	NA	NA	NA	NA	NA	NA	NA
125	0.16064	-2.6381	0.014827	1.829	58.51	183.065	down	uniquelyDA		NA	NA	NA	NA	NA	NA	NA	NA
4644	0.15545	-2.6855	0.031483	1.5019	235.76	551.222	down	uniquelyDA		NA	NA	NA	NA	NA	NA	NA	NA
9368	0.11653	-3.1012	0.0011988	2.9212	1024.29	597.478	down	uniquelyDA		NA	NA	NA	NA	NA	NA	NA	NA
265	0.11651	-3.1015	9.42e-05	4.0257	62.54	448.133	down	uniquelyDA		NA	NA	NA	NA	NA	NA	NA	NA
3581	0.11476	-3.1233	0.0018962	2.7221	62.12	223.069	down	uniquelyDA		NA	NA	NA	NA	NA	NA	NA	NA
4544	0.10811	-3.2095	0.017327	1.7613	232.65	498.135	down	uniquelyDA		NA	NA	NA	NA	NA	NA	NA	NA
7743	0.084612	-3.563	0.039036	1.4085	957.68	448.297	down	uniquelyDA		NA	NA	NA	NA	NA	NA	NA	NA
1028	0.079974	-3.6443	0.0010779	2.9674	385.84	1062.37	down	uniquelyDA		NA	NA	NA	NA	NA	NA	NA	NA
7477	0.079324	-3.6561	0.0076873	2.1142	940.33	208.073	down	uniquelyDA		NA	NA	NA	NA	NA	NA	NA	NA
5911	0.077019	-3.6986	0.0014904	2.8267	648.48	317.141	down	uniquelyDA		NA	NA	NA	NA	NA	NA	NA	NA
1027	0.07074	-3.8213	0.0036966	2.4322	385.83	1078.34	down	uniquelyDA		NA	NA	NA	NA	NA	NA	NA	NA
5912	0.066943	-3.9009	0.0012276	2.911	649.5	424.127	down	uniquelyDA		NA	NA	NA	NA	NA	NA	NA	NA
4466	0.066657	-3.9071	0.0019083	2.7194	225.39	722.21	down	uniquelyDA		NA	NA	NA	NA	NA	NA	NA	NA
1409	0.063777	-3.9708	0.0053344	2.2729	735.27	359.188	down	uniquelyDA		NA	NA	NA	NA	NA	NA	NA	NA
2149	0.04972	-4.33	0.010774	1.9676	1008.95	482.184	down	uniquelyDA		NA	NA	NA	NA	NA	NA	NA	NA
8835	0.045277	-4.4651	0.0053603	2.2708	1008.92	208.073	down	uniquelyDA		NA	NA	NA	NA	NA	NA	NA	NA
1026	0.039169	-4.6741	0.000262	3.5825	385.81	1057.42	down	uniquelyDA		NA	NA	NA	NA	NA	NA	NA	NA
7437	0.038554	-4.697	0.0026807	2.5717	936.77	570.463	down	uniquelyDA		NA	NA	NA	NA	NA	NA	NA	NA
1024	0.036949	-4.7583	0.000205	3.6878	385.77	716.284	down	uniquelyDA		NA	NA	NA	NA	NA	NA	NA	NA
2184	0.018234	-5.7772	0.047795	1.3206	1011.08	433.179	down	uniquelyDA		NA	NA	NA	NA	NA	NA	NA	NA
10383	32.247	5.0111	1.83e-07	6.737	1060.79	238.229	up	uniquelyDA		NA	NA	NA	NA	NA	NA	NA	NA
2402	28.552	4.8355	1.44e-08	7.8417	1061.37	313.269	up	uniquelyDA		NA	NA	NA	NA	NA	NA	NA	NA
9424	13.506	3.7555	0.000765	3.1161	1028.58	435.313	up	uniquelyDA		NA	NA	NA	NA	NA	NA	NA	NA
6406	12.638	3.6597	0.019928	1.7005	827.15	504.247	up	uniquelyDA		NA	NA	NA	NA	NA	NA	NA	NA
2157	11.948	3.5787	0.048974	1.31	1009.5	763.523	up	uniquelyDA		NA	NA	NA	NA	NA	NA	NA	NA
6492	11.657	3.5431	0.029122	1.5358	838.95	330.277	up	uniquelyDA		NA	NA	NA	NA	NA	NA	NA	NA
8406	11.618	3.5384	0.0051842	2.2853	991.22	210.198	up	uniquelyDA		NA	NA	NA	NA	NA	NA	NA	NA
8935	10.532	3.3967	0.04124	1.3847	1009.6	768.48	up	uniquelyDA		NA	NA	NA	NA	NA	NA	NA	NA
6311	10.375	3.375	0.014438	1.8405	818.2	351.22	up	uniquelyDA		NA	NA	NA	NA	NA	NA	NA	NA
1620	10.234	3.3553	0.030275	1.5189	839.78	612.212	up	uniquelyDA		NA	NA	NA	NA	NA	NA	NA	NA
1641	9.8725	3.3034	0.000343	3.4646	853.98	365.235	up	uniquelyDA		NA	NA	NA	NA	NA	NA	NA	NA
6750	9.7387	3.2837	3.74e-08	7.4272	876.43	310.214	up	uniquelyDA		NA	NA	NA	NA	NA	NA	NA	NA
11062	8.9409	3.1604	3.44e-08	7.4632	758	346.175	up	uniquelyDA		NA	NA	NA	NA	NA	NA	NA	NA
6113	8.7215	3.1246	1.29e-06	5.8897	760.09	268.167	up	uniquelyDA		NA	NA	NA	NA	NA	NA	NA	NA
6106	8.4157	3.0731	0.0028628	2.5432	759.4	270.161	up	uniquelyDA		NA	NA	NA	NA	NA	NA	NA	NA
1378	8.2175	3.0387	0.0017237	2.7635	710.53	309.172	up	uniquelyDA		NA	NA	NA	NA	NA	NA	NA	NA
1679	7.9829	2.9969	0.000504	3.2973	867.05	552.418	up	uniquelyDA		NA	NA	NA	NA	NA	NA	NA	NA
6861	7.9735	2.9952	1.6e-07	6.7946	887.04	332.196	up	uniquelyDA		NA	NA	NA	NA	NA	NA	NA	NA
7661	7.8859	2.9793	0.017501	1.7569	954.33	457.298	up	uniquelyDA		NA	NA	NA	NA	NA	NA	NA	NA
6105	7.7218	2.9489	5.26e-10	9.2793	759.58	288.172	up	uniquelyDA		NA	NA	NA	NA	NA	NA	NA	NA
7649	7.5878	2.9237	0.0057224	2.2424	953.54	349.261	up	uniquelyDA		NA	NA	NA	NA	NA	NA	NA	NA
3524	7.5075	2.9083	0.0018351	2.7363	59.27	264.086	up	uniquelyDA		NA	NA	NA	NA	NA	NA	NA	NA
1414	7.5003	2.907	1.04e-05	4.9818	739.64	354.111	up	uniquelyDA		NA	NA	NA	NA	NA	NA	NA	NA
2138	7.5006	2.907	0.039824	1.3999	1006.81	802.418	up	uniquelyDA		NA	NA	NA	NA	NA	NA	NA	NA
11063	7.2124	2.8505	1.93e-06	5.7135	757.81	306.182	up	uniquelyDA		NA	NA	NA	NA	NA	NA	NA	NA
6148	7.1232	2.8325	1.63e-06	5.7885	774.77	288.172	up	uniquelyDA		NA	NA	NA	NA	NA	NA	NA	NA
9819	6.967	2.8005	0.0026456	2.5775	1040.63	393.325	up	uniquelyDA		NA	NA	NA	NA	NA	NA	NA	NA
5951	6.9183	2.7904	6.89e-05	4.1618	676.84	306.183	up	uniquelyDA		NA	NA	NA	NA	NA	NA	NA	NA
757	6.7922	2.7639	0.00025	3.602	259.7	247.132	up	uniquelyDA		NA	NA	NA	NA	NA	NA	NA	NA
6575	6.5864	2.7195	3.03e-06	5.5192	856.28	310.214	up	uniquelyDA		NA	NA	NA	NA	NA	NA	NA	NA
1822	6.569	2.7157	4.3e-07	6.3666	918.31	178.136	up	uniquelyDA		NA	NA	NA	NA	NA	NA	NA	NA
6307	6.5323	2.7076	6.24e-07	6.2049	818.45	252.172	up	uniquelyDA		NA	NA	NA	NA	NA	NA	NA	NA
911	6.4509	2.6895	0.0033046	2.4809	318.17	351.035	up	uniquelyDA		NA	NA	NA	NA	NA	NA	NA	NA
5990	5.9742	2.5788	6.43e-06	5.1919	690.92	306.182	up	uniquelyDA		NA	NA	NA	NA	NA	NA	NA	NA
6137	5.847	2.5477	1.82e-05	4.7389	771.5	238.156	up	uniquelyDA		NA	NA	NA	NA	NA	NA	NA	NA
6751	5.7815	2.5314	6.37e-06	5.1959	876.24	210.125	up	uniquelyDA		NA	NA	NA	NA	NA	NA	NA	NA
9730	5.7031	2.5118	0.028586	1.5439	1037.14	363.277	up	uniquelyDA		NA	NA	NA	NA	NA	NA	NA	NA
8774	5.5743	2.4788	0.027719	1.5572	1007.52	324.229	up	uniquelyDA		NA	NA	NA	NA	NA	NA	NA	NA
5078	5.5332	2.4681	7.08e-06	5.1497	265.54	202.074	up	uniquelyDA		NA	NA	NA	NA	NA	NA	NA	NA
6523	5.4741	2.4526	3.43e-06	5.4645	844.15	334.212	up	uniquelyDA		NA	NA	NA	NA	NA	NA	NA	NA
6218	5.4718	2.452	0.0075322	2.1231	800	236.177	up	uniquelyDA		NA	NA	NA	NA	NA	NA	NA	NA
6154	5.3423	2.4175	1.05e-05	4.9779	776.34	346.175	up	uniquelyDA		NA	NA	NA	NA	NA	NA	NA	NA
7067	5.2938	2.4043	3.11e-06	5.5077	906.87	332.196	up	uniquelyDA		NA	NA	NA	NA	NA	NA	NA	NA
5725	5.2641	2.3962	0.0066149	2.1795	446.92	324.099	up	uniquelyDA		NA	NA	NA	NA	NA	NA	NA	NA
6011	5.1504	2.3647	0.000248	3.606	702.48	324.193	up	uniquelyDA		NA	NA	NA	NA	NA	NA	NA	NA
7402	5.1494	2.3644	1.23e-05	4.9092	935.29	294.219	up	uniquelyDA		NA	NA	NA	NA	NA	NA	NA	NA
10384	5.1127	2.3541	6.17e-12	11.209	1060.74	256.241	up	uniquelyDA		NA	NA	NA	NA	NA	NA	NA	NA
2390	5.0808	2.3451	3.89e-13	12.41	1060.51	1046.75	up	uniquelyDA		NA	NA	NA	NA	NA	NA	NA	NA
4795	4.9854	2.3177	0.01843	1.7345	247.79	268.052	up	uniquelyDA		NA	NA	NA	NA	NA	NA	NA	NA
9582	4.9395	2.3044	6.39e-06	5.1948	1031.38	386.303	up	uniquelyDA		NA	NA	NA	NA	NA	NA	NA	NA
6240	4.8779	2.2862	2.22e-05	4.6535	809.82	274.193	up	uniquelyDA		NA	NA	NA	NA	NA	NA	NA	NA
556	4.7645	2.2523	0.0034356	2.464	228.18	192.126	up	uniquelyDA		NA	NA	NA	NA	NA	NA	NA	NA
1717	4.7637	2.2521	5.34e-05	4.2725	883.72	406.283	up	uniquelyDA		NA	NA	NA	NA	NA	NA	NA	NA
6171	4.7591	2.2507	0.000107	3.9691	781.94	306.182	up	uniquelyDA		NA	NA	NA	NA	NA	NA	NA	NA
1290	4.6448	2.2156	0.000712	3.1474	642.62	322.008	up	uniquelyDA		NA	NA	NA	NA	NA	NA	NA	NA
6836	4.6436	2.2152	6.04e-05	4.2189	885.36	218.167	up	uniquelyDA		NA	NA	NA	NA	NA	NA	NA	NA
6541	4.608	2.2041	2.46e-06	5.6083	846.96	290.187	up	uniquelyDA		NA	NA	NA	NA	NA	NA	NA	NA
7174	4.5978	2.2009	4.75e-06	5.323	917.41	294.219	up	uniquelyDA		NA	NA	NA	NA	NA	NA	NA	NA
6226	4.5121	2.1738	1.04e-05	4.9831	803.89	312.229	up	uniquelyDA		NA	NA	NA	NA	NA	NA	NA	NA
1541	4.4998	2.1698	1.29e-05	4.8904	809.42	332.196	up	uniquelyDA		NA	NA	NA	NA	NA	NA	NA	NA
6485	4.4996	2.1698	6.35e-06	5.197	838.28	308.198	up	uniquelyDA		NA	NA	NA	NA	NA	NA	NA	NA
7825	4.4896	2.1666	5.23e-05	4.2814	963.2	292.24	up	uniquelyDA		NA	NA	NA	NA	NA	NA	NA	NA
1998	4.4277	2.1466	0.012445	1.905	971.96	325.262	up	uniquelyDA		NA	NA	NA	NA	NA	NA	NA	NA
1427	4.3732	2.1287	0.000125	3.9032	753.03	345.111	up	uniquelyDA		NA	NA	NA	NA	NA	NA	NA	NA
5915	4.3433	2.1188	6.99e-05	4.1558	650.53	290.188	up	uniquelyDA		NA	NA	NA	NA	NA	NA	NA	NA
9340	4.1335	2.0474	0.022	1.6576	1022.73	428.325	up	uniquelyDA		NA	NA	NA	NA	NA	NA	NA	NA
7729	4.101	2.036	3.59e-07	6.4445	957.69	296.234	up	uniquelyDA		NA	NA	NA	NA	NA	NA	NA	NA
3715	4.091	2.0325	0.000542	3.2662	61.69	135.054	up	uniquelyDA		NA	NA	NA	NA	NA	NA	NA	NA
769	4.0701	2.0251	3.17e-05	4.4992	261.65	441.067	up	uniquelyDA		NA	NA	NA	NA	NA	NA	NA	NA
6837	4.0617	2.0221	5.05e-05	4.297	885.62	292.204	up	uniquelyDA		NA	NA	NA	NA	NA	NA	NA	NA
1319	4.0494	2.0177	0.002041	2.6902	667.7	190.074	up	uniquelyDA		NA	NA	NA	NA	NA	NA	NA	NA
6063	4.0305	2.011	5.94e-05	4.2262	735.88	348.19	up	uniquelyDA		NA	NA	NA	NA	NA	NA	NA	NA
7895	3.9808	1.993	0.0063068	2.2002	966.83	472.376	up	uniquelyDA		NA	NA	NA	NA	NA	NA	NA	NA
6141	3.9522	1.9827	2.39e-05	4.6215	774.24	308.199	up	uniquelyDA		NA	NA	NA	NA	NA	NA	NA	NA
7750	3.9081	1.9665	5.52e-06	5.2583	958.83	354.276	up	uniquelyDA		NA	NA	NA	NA	NA	NA	NA	NA
9545	3.8937	1.9612	0.0060522	2.2181	1029.26	705.459	up	uniquelyDA		NA	NA	NA	NA	NA	NA	NA	NA
10620	3.8428	1.9422	0.031522	1.5014	1067.63	172.125	up	uniquelyDA		NA	NA	NA	NA	NA	NA	NA	NA
9946	3.8398	1.941	0.013877	1.8577	1045.04	242.179	up	uniquelyDA		NA	NA	NA	NA	NA	NA	NA	NA
6547	3.8289	1.9369	5.19e-06	5.2845	847.15	330.181	up	uniquelyDA		NA	NA	NA	NA	NA	NA	NA	NA
6086	3.8213	1.9341	0.000115	3.9397	750.75	272.176	up	uniquelyDA		NA	NA	NA	NA	NA	NA	NA	NA
6535	3.8105	1.93	7.08e-05	4.1502	845.48	348.229	up	uniquelyDA		NA	NA	NA	NA	NA	NA	NA	NA
3639	3.8041	1.9276	0.032407	1.4894	62.4	228.014	up	uniquelyDA		NA	NA	NA	NA	NA	NA	NA	NA
3501	3.788	1.9215	0.000729	3.1374	58.74	163.085	up	uniquelyDA		NA	NA	NA	NA	NA	NA	NA	NA
6499	3.7615	1.9113	0.03056	1.5148	837.98	337.263	up	uniquelyDA		NA	NA	NA	NA	NA	NA	NA	NA
6840	3.695	1.8856	7.14e-05	4.1465	885.53	256.182	up	uniquelyDA		NA	NA	NA	NA	NA	NA	NA	NA
7971	3.69	1.8836	0.0010075	2.9968	971.04	665.427	up	uniquelyDA		NA	NA	NA	NA	NA	NA	NA	NA
8515	3.6816	1.8803	0.0020003	2.6989	995.48	421.298	up	uniquelyDA		NA	NA	NA	NA	NA	NA	NA	NA
7732	3.6764	1.8783	0.000377	3.4234	957.77	352.154	up	uniquelyDA		NA	NA	NA	NA	NA	NA	NA	NA
9363	3.6129	1.8531	0.041134	1.3858	1024.05	379.31	up	uniquelyDA		NA	NA	NA	NA	NA	NA	NA	NA
1076	3.552	1.8286	0.018028	1.7441	436.66	360.07	up	uniquelyDA		NA	NA	NA	NA	NA	NA	NA	NA
767	3.5271	1.8185	4.34e-06	5.363	261.19	279.014	up	uniquelyDA		NA	NA	NA	NA	NA	NA	NA	NA
7640	3.4974	1.8063	5.96e-06	5.2247	953.83	278.224	up	uniquelyDA		NA	NA	NA	NA	NA	NA	NA	NA
3963	3.4713	1.7955	0.0029136	2.5356	86.8	390.066	up	uniquelyDA		NA	NA	NA	NA	NA	NA	NA	NA
714	3.4645	1.7927	0.010759	1.9682	256.04	563.113	up	uniquelyDA		NA	NA	NA	NA	NA	NA	NA	NA
6217	3.3924	1.7623	0.000412	3.3848	800	276.208	up	uniquelyDA		NA	NA	NA	NA	NA	NA	NA	NA
10473	3.3637	1.75	1.04e-06	5.9834	1061.44	124.125	up	uniquelyDA		NA	NA	NA	NA	NA	NA	NA	NA
4905	3.3451	1.7421	0.013102	1.8826	255.77	332.148	up	uniquelyDA		NA	NA	NA	NA	NA	NA	NA	NA
7961	3.3142	1.7287	0.000964	3.0161	969.58	290.187	up	uniquelyDA		NA	NA	NA	NA	NA	NA	NA	NA
7395	3.3106	1.7271	0.024662	1.608	933.33	570.433	up	uniquelyDA		NA	NA	NA	NA	NA	NA	NA	NA
5704	3.305	1.7247	0.010714	1.97	438.95	294.11	up	uniquelyDA		NA	NA	NA	NA	NA	NA	NA	NA
7290	3.2822	1.7147	0.000151	3.822	927.17	292.167	up	uniquelyDA		NA	NA	NA	NA	NA	NA	NA	NA
6114	3.2511	1.7009	0.000194	3.7132	761.06	290.188	up	uniquelyDA		NA	NA	NA	NA	NA	NA	NA	NA
6973	3.248	1.6995	0.0035378	2.4513	897.03	274.193	up	uniquelyDA		NA	NA	NA	NA	NA	NA	NA	NA
1656	3.2471	1.6992	0.018574	1.7311	859.22	1412.69	up	uniquelyDA		NA	NA	NA	NA	NA	NA	NA	NA
7731	3.2192	1.6867	3.18e-05	4.4979	958.26	651.411	up	uniquelyDA		NA	NA	NA	NA	NA	NA	NA	NA
6919	3.2068	1.6811	0.004019	2.3959	892.36	314.185	up	uniquelyDA		NA	NA	NA	NA	NA	NA	NA	NA
6008	3.2026	1.6792	0.0034402	2.4634	701.78	330.239	up	uniquelyDA		NA	NA	NA	NA	NA	NA	NA	NA
6665	3.1963	1.6764	0.000481	3.3181	866.98	294.219	up	uniquelyDA		NA	NA	NA	NA	NA	NA	NA	NA
1394	3.1891	1.6732	0.0061938	2.208	729.84	184.064	up	uniquelyDA		NA	NA	NA	NA	NA	NA	NA	NA
6598	3.1887	1.673	5.62e-05	4.25	856.67	330.181	up	uniquelyDA		NA	NA	NA	NA	NA	NA	NA	NA
5207	3.183	1.6704	0.034501	1.4622	281.07	342.11	up	uniquelyDA		NA	NA	NA	NA	NA	NA	NA	NA
5723	3.1788	1.6685	0.000554	3.2562	445.9	191.058	up	uniquelyDA		NA	NA	NA	NA	NA	NA	NA	NA
1395	3.1727	1.6657	0.0012958	2.8875	729.98	356.126	up	uniquelyDA		NA	NA	NA	NA	NA	NA	NA	NA
4029	3.1708	1.6648	0.0015338	2.8142	87.19	228.012	up	uniquelyDA		NA	NA	NA	NA	NA	NA	NA	NA
10613	3.1674	1.6633	0.0169	1.7721	1067.6	180.151	up	uniquelyDA		NA	NA	NA	NA	NA	NA	NA	NA
7163	3.1649	1.6621	0.041639	1.3805	915.19	240.186	up	uniquelyDA		NA	NA	NA	NA	NA	NA	NA	NA
2388	3.1346	1.6483	1.49e-05	4.8264	1060.25	716.469	up	uniquelyDA		NA	NA	NA	NA	NA	NA	NA	NA
6243	3.1187	1.6409	2.46e-05	4.6086	809.67	232.146	up	uniquelyDA		NA	NA	NA	NA	NA	NA	NA	NA
10574	3.1067	1.6354	1.29e-06	5.8906	1064.63	108.094	up	uniquelyDA		NA	NA	NA	NA	NA	NA	NA	NA
3607	3.1062	1.6352	0.0037136	2.4302	62.26	390.066	up	uniquelyDA		NA	NA	NA	NA	NA	NA	NA	NA
6911	3.0958	1.6303	0.0032317	2.4906	892.25	274.193	up	uniquelyDA		NA	NA	NA	NA	NA	NA	NA	NA
6710	3.0911	1.6281	0.000547	3.2618	872.22	276.209	up	uniquelyDA		NA	NA	NA	NA	NA	NA	NA	NA
8779	3.0822	1.6239	0.02611	1.5832	1007.06	232.182	up	uniquelyDA		NA	NA	NA	NA	NA	NA	NA	NA
5293	3.0537	1.6105	0.0024574	2.6095	299.15	295.055	up	uniquelyDA		NA	NA	NA	NA	NA	NA	NA	NA
6024	3.0526	1.61	2.34e-05	4.6313	710.35	236.14	up	uniquelyDA		NA	NA	NA	NA	NA	NA	NA	NA
7777	3.0295	1.5991	4.79e-05	4.3196	959.49	290.187	up	uniquelyDA		NA	NA	NA	NA	NA	NA	NA	NA
1768	3.0214	1.5952	7.89e-06	5.1029	902.22	334.144	up	uniquelyDA		NA	NA	NA	NA	NA	NA	NA	NA
8298	3.0109	1.5902	0.046405	1.3334	986.98	339.275	up	uniquelyDA		NA	NA	NA	NA	NA	NA	NA	NA
1411	2.9963	1.5832	4.8e-05	4.3185	737.99	210.125	up	uniquelyDA		NA	NA	NA	NA	NA	NA	NA	NA
7990	2.9855	1.578	0.0013849	2.8586	971.44	637.432	up	uniquelyDA		NA	NA	NA	NA	NA	NA	NA	NA
8392	2.9795	1.5751	0.0027072	2.5675	992.38	479.325	up	uniquelyDA		NA	NA	NA	NA	NA	NA	NA	NA
3602	2.9687	1.5698	0.0065072	2.1866	62.5	154.073	up	uniquelyDA		NA	NA	NA	NA	NA	NA	NA	NA
3813	2.967	1.569	0.003933	2.4053	62.44	428.021	up	uniquelyDA		NA	NA	NA	NA	NA	NA	NA	NA
6675	2.9623	1.5667	0.0012113	2.9168	867.06	332.128	up	uniquelyDA		NA	NA	NA	NA	NA	NA	NA	NA
9619	2.9602	1.5657	0.000123	3.9101	1033.39	293.272	up	uniquelyDA		NA	NA	NA	NA	NA	NA	NA	NA
10622	2.9595	1.5654	0.012644	1.8981	1067.71	244.168	up	uniquelyDA		NA	NA	NA	NA	NA	NA	NA	NA
3553	2.9176	1.5448	0.00038	3.4206	60.06	372.065	up	uniquelyDA		NA	NA	NA	NA	NA	NA	NA	NA
1721	2.9017	1.5369	0.0027876	2.5548	886.21	365.329	up	uniquelyDA		NA	NA	NA	NA	NA	NA	NA	NA
1655	2.8994	1.5357	0.015256	1.8166	859.2	1394.72	up	uniquelyDA		NA	NA	NA	NA	NA	NA	NA	NA
3352	2.8933	1.5327	4.18e-05	4.3786	57.75	255.996	up	uniquelyDA		NA	NA	NA	NA	NA	NA	NA	NA
10353	2.8889	1.5305	0.045982	1.3374	1058.47	462.37	up	uniquelyDA		NA	NA	NA	NA	NA	NA	NA	NA
1644	2.8889	1.5305	0.0030188	2.5202	855.86	501.382	up	uniquelyDA		NA	NA	NA	NA	NA	NA	NA	NA
1340	2.8874	1.5298	3.16e-05	4.4998	684.17	195.009	up	uniquelyDA		NA	NA	NA	NA	NA	NA	NA	NA
4046	2.8807	1.5264	0.0093086	2.0311	87.73	135.054	up	uniquelyDA		NA	NA	NA	NA	NA	NA	NA	NA
1169	2.8699	1.521	0.0024286	2.6146	511.17	397.13	up	uniquelyDA		NA	NA	NA	NA	NA	NA	NA	NA
7183	2.8337	1.5027	0.000909	3.0413	916.98	350.139	up	uniquelyDA		NA	NA	NA	NA	NA	NA	NA	NA
5728	2.8289	1.5002	8.38e-06	5.0767	449	188.105	up	uniquelyDA		NA	NA	NA	NA	NA	NA	NA	NA
10614	2.8187	1.495	0.035383	1.4512	1067.61	367.308	up	uniquelyDA		NA	NA	NA	NA	NA	NA	NA	NA
8940	2.7944	1.4825	0.049145	1.3085	1009.94	120.094	up	uniquelyDA		NA	NA	NA	NA	NA	NA	NA	NA
6032	2.7908	1.4807	0.014201	1.8477	714.28	335.209	up	uniquelyDA		NA	NA	NA	NA	NA	NA	NA	NA
1178	2.7879	1.4792	0.000445	3.3513	544.84	160.04	up	uniquelyDA		NA	NA	NA	NA	NA	NA	NA	NA
616	2.7806	1.4754	0.032237	1.4916	236.11	814.086	up	uniquelyDA		NA	NA	NA	NA	NA	NA	NA	NA
10340	2.7721	1.471	0.024052	1.6188	1058.21	128.12	up	uniquelyDA		NA	NA	NA	NA	NA	NA	NA	NA
6937	2.7525	1.4607	0.0018397	2.7353	892.25	208.146	up	uniquelyDA		NA	NA	NA	NA	NA	NA	NA	NA
8080	2.7519	1.4604	0.034741	1.4592	977.83	760.449	up	uniquelyDA		NA	NA	NA	NA	NA	NA	NA	NA
4024	2.7459	1.4573	0.0036084	2.4427	87.16	112.028	up	uniquelyDA		NA	NA	NA	NA	NA	NA	NA	NA
4006	2.7442	1.4564	0.0059875	2.2228	87	407.092	up	uniquelyDA		NA	NA	NA	NA	NA	NA	NA	NA
8288	2.7343	1.4512	0.000428	3.3685	986.99	377.293	up	uniquelyDA		NA	NA	NA	NA	NA	NA	NA	NA
3419	2.7208	1.444	0.000222	3.6532	59	218.04	up	uniquelyDA		NA	NA	NA	NA	NA	NA	NA	NA
3742	2.7051	1.4357	0.0010919	2.9618	62.46	112.027	up	uniquelyDA		NA	NA	NA	NA	NA	NA	NA	NA
6641	2.6906	1.4279	2.27e-05	4.6431	863.13	352.26	up	uniquelyDA		NA	NA	NA	NA	NA	NA	NA	NA
707	2.6834	1.4241	0.0041476	2.3822	254.32	337.109	up	uniquelyDA		NA	NA	NA	NA	NA	NA	NA	NA
3669	2.6774	1.4208	0.0082049	2.0859	62.25	407.092	up	uniquelyDA		NA	NA	NA	NA	NA	NA	NA	NA
10374	2.6754	1.4197	0.0046916	2.3287	1058.91	339.313	up	uniquelyDA		NA	NA	NA	NA	NA	NA	NA	NA
6941	2.6728	1.4184	0.003727	2.4286	894	276.208	up	uniquelyDA		NA	NA	NA	NA	NA	NA	NA	NA
995	2.6699	1.4168	0.018078	1.7429	362.1	203.082	up	uniquelyDA		NA	NA	NA	NA	NA	NA	NA	NA
6518	2.6601	1.4115	0.001591	2.7983	845.24	276.208	up	uniquelyDA		NA	NA	NA	NA	NA	NA	NA	NA
6475	2.6561	1.4093	0.000489	3.3103	837.17	348.229	up	uniquelyDA		NA	NA	NA	NA	NA	NA	NA	NA
516	2.6494	1.4056	0.029845	1.5251	224.86	218.107	up	uniquelyDA		NA	NA	NA	NA	NA	NA	NA	NA
708	2.6314	1.3958	0.009616	2.017	254.44	273.111	up	uniquelyDA		NA	NA	NA	NA	NA	NA	NA	NA
8777	2.6132	1.3858	0.010894	1.9628	1007.31	352.26	up	uniquelyDA		NA	NA	NA	NA	NA	NA	NA	NA
3660	2.5709	1.3623	0.0040015	2.3978	62.36	439.063	up	uniquelyDA		NA	NA	NA	NA	NA	NA	NA	NA
9136	2.5244	1.336	0.024178	1.6166	1014.8	705.46	up	uniquelyDA		NA	NA	NA	NA	NA	NA	NA	NA
6597	2.5146	1.3303	0.000292	3.5341	856.63	308.197	up	uniquelyDA		NA	NA	NA	NA	NA	NA	NA	NA
9559	2.5139	1.3299	2.72e-05	4.565	1029.92	454.343	up	uniquelyDA		NA	NA	NA	NA	NA	NA	NA	NA
8550	2.505	1.3248	0.007331	2.1348	996.89	339.275	up	uniquelyDA		NA	NA	NA	NA	NA	NA	NA	NA
6738	2.4874	1.3147	0.023419	1.6304	875.11	316.201	up	uniquelyDA		NA	NA	NA	NA	NA	NA	NA	NA
8592	2.4836	1.3125	0.0050868	2.2936	998.72	635.416	up	uniquelyDA		NA	NA	NA	NA	NA	NA	NA	NA
6151	2.4744	1.3071	0.000569	3.2448	776.02	292.203	up	uniquelyDA		NA	NA	NA	NA	NA	NA	NA	NA
1934	2.4732	1.3064	3.31e-05	4.48	954.16	337.267	up	uniquelyDA		NA	NA	NA	NA	NA	NA	NA	NA
2174	2.4672	1.3029	0.040696	1.3905	1010.26	588.53	up	uniquelyDA		NA	NA	NA	NA	NA	NA	NA	NA
8154	2.4414	1.2877	0.0026326	2.5796	979.86	691.443	up	uniquelyDA		NA	NA	NA	NA	NA	NA	NA	NA
10515	2.4411	1.2875	0.008274	2.0823	1062.78	532.411	up	uniquelyDA		NA	NA	NA	NA	NA	NA	NA	NA
6944	2.4364	1.2848	0.0053267	2.2735	894.24	312.185	up	uniquelyDA		NA	NA	NA	NA	NA	NA	NA	NA
6722	2.431	1.2816	0.000361	3.4419	873.34	695.41	up	uniquelyDA		NA	NA	NA	NA	NA	NA	NA	NA
1946	2.4279	1.2797	0.0015087	2.8214	956.35	182.131	up	uniquelyDA		NA	NA	NA	NA	NA	NA	NA	NA
4282	2.426	1.2786	0.015277	1.816	209.4	297.043	up	uniquelyDA		NA	NA	NA	NA	NA	NA	NA	NA
317	2.4239	1.2773	0.0016171	2.7913	91.27	283.091	up	uniquelyDA		NA	NA	NA	NA	NA	NA	NA	NA
9230	2.4111	1.2697	0.0014324	2.8439	1019.28	262.229	up	uniquelyDA		NA	NA	NA	NA	NA	NA	NA	NA
3615	2.4029	1.2648	0.002404	2.6191	61.08	178.045	up	uniquelyDA		NA	NA	NA	NA	NA	NA	NA	NA
5777	2.4028	1.2647	0.0060022	2.2217	520.72	406.109	up	uniquelyDA		NA	NA	NA	NA	NA	NA	NA	NA
325	2.3995	1.2627	0.01343	1.8719	106.46	186.047	up	uniquelyDA		NA	NA	NA	NA	NA	NA	NA	NA
5779	2.3929	1.2588	0.000719	3.1431	531.14	205.074	up	uniquelyDA		NA	NA	NA	NA	NA	NA	NA	NA
5568	2.3926	1.2586	0.0092977	2.0316	362.57	204.09	up	uniquelyDA		NA	NA	NA	NA	NA	NA	NA	NA
6010	2.391	1.2576	0.0056021	2.2517	701.74	384.16	up	uniquelyDA		NA	NA	NA	NA	NA	NA	NA	NA
6681	2.3864	1.2549	5.7e-05	4.2441	866.17	258.197	up	uniquelyDA		NA	NA	NA	NA	NA	NA	NA	NA
1643	2.3827	1.2526	0.010815	1.966	855.77	363.313	up	uniquelyDA		NA	NA	NA	NA	NA	NA	NA	NA
3857	2.3803	1.2512	0.0015102	2.821	62.59	122.004	up	uniquelyDA		NA	NA	NA	NA	NA	NA	NA	NA
9061	2.3795	1.2507	0.0039065	2.4082	1012.13	500.371	up	uniquelyDA		NA	NA	NA	NA	NA	NA	NA	NA
6570	2.3765	1.2488	0.000243	3.6141	853.51	323.282	up	uniquelyDA		NA	NA	NA	NA	NA	NA	NA	NA
10617	2.3682	1.2438	0.012758	1.8942	1067.7	241.168	up	uniquelyDA		NA	NA	NA	NA	NA	NA	NA	NA
6713	2.3584	1.2378	0.000468	3.33	873.32	678.384	up	uniquelyDA		NA	NA	NA	NA	NA	NA	NA	NA
10615	2.3536	1.2349	0.0067282	2.1721	1067.18	112.089	up	uniquelyDA		NA	NA	NA	NA	NA	NA	NA	NA
3520	2.3529	1.2345	0.010569	1.976	59.17	122.048	up	uniquelyDA		NA	NA	NA	NA	NA	NA	NA	NA
6735	2.351	1.2333	0.0010616	2.9741	874.68	390.238	up	uniquelyDA		NA	NA	NA	NA	NA	NA	NA	NA
1817	2.35	1.2327	0.0041116	2.386	917.32	450.065	up	uniquelyDA		NA	NA	NA	NA	NA	NA	NA	NA
1739	2.3469	1.2308	0.0091099	2.0405	892.32	348.123	up	uniquelyDA		NA	NA	NA	NA	NA	NA	NA	NA
1166	2.345	1.2296	0.00058	3.2364	511.03	185.071	up	uniquelyDA		NA	NA	NA	NA	NA	NA	NA	NA
3749	2.3434	1.2286	0.009234	2.0346	62.59	141.043	up	uniquelyDA		NA	NA	NA	NA	NA	NA	NA	NA
1621	2.3387	1.2257	0.01118	1.9516	839.92	488.338	up	uniquelyDA		NA	NA	NA	NA	NA	NA	NA	NA
4074	2.3349	1.2234	0.020104	1.6967	91.25	151.05	up	uniquelyDA		NA	NA	NA	NA	NA	NA	NA	NA
10355	2.3291	1.2198	0.000153	3.8152	1058.58	274.25	up	uniquelyDA		NA	NA	NA	NA	NA	NA	NA	NA
5772	2.3129	1.2097	0.010082	1.9965	509.54	406.11	up	uniquelyDA		NA	NA	NA	NA	NA	NA	NA	NA
9579	2.3001	1.2017	0.0018692	2.7283	1031.69	624.475	up	uniquelyDA		NA	NA	NA	NA	NA	NA	NA	NA
7782	2.2894	1.1949	0.0083853	2.0765	959.86	277.24	up	uniquelyDA		NA	NA	NA	NA	NA	NA	NA	NA
3452	2.282	1.1903	0.000485	3.3145	59.07	254.099	up	uniquelyDA		NA	NA	NA	NA	NA	NA	NA	NA
5688	2.2773	1.1873	0.011601	1.9355	422.77	207.035	up	uniquelyDA		NA	NA	NA	NA	NA	NA	NA	NA
3403	2.2625	1.1779	0.001487	2.8277	58.38	598.112	up	uniquelyDA		NA	NA	NA	NA	NA	NA	NA	NA
5595	2.2619	1.1775	0.023728	1.6247	371.52	171.066	up	uniquelyDA		NA	NA	NA	NA	NA	NA	NA	NA
7361	2.25	1.1699	0.00089	3.0504	932.96	262.229	up	uniquelyDA		NA	NA	NA	NA	NA	NA	NA	NA
1677	2.2491	1.1693	0.002214	2.6548	866.31	329.121	up	uniquelyDA		NA	NA	NA	NA	NA	NA	NA	NA
1175	2.2405	1.1638	0.0043521	2.3613	531.86	173.048	up	uniquelyDA		NA	NA	NA	NA	NA	NA	NA	NA
10405	2.2354	1.1606	0.0012767	2.8939	1060.27	384.301	up	uniquelyDA		NA	NA	NA	NA	NA	NA	NA	NA
7360	2.1989	1.1368	0.0024171	2.6167	933.01	354.276	up	uniquelyDA		NA	NA	NA	NA	NA	NA	NA	NA
3711	2.1929	1.1329	0.0016986	2.7699	61.29	172.085	up	uniquelyDA		NA	NA	NA	NA	NA	NA	NA	NA
97	2.193	1.1329	0.0015742	2.803	55.88	265.152	up	uniquelyDA		NA	NA	NA	NA	NA	NA	NA	NA
9051	2.1818	1.1255	0.0017643	2.7534	1012.26	628.419	up	uniquelyDA		NA	NA	NA	NA	NA	NA	NA	NA
10414	2.1817	1.1254	0.0016321	2.7872	1059.6	121.089	up	uniquelyDA		NA	NA	NA	NA	NA	NA	NA	NA
5612	2.18	1.1243	0.032049	1.4942	380.43	274.132	up	uniquelyDA		NA	NA	NA	NA	NA	NA	NA	NA
10138	2.1797	1.1241	0.024415	1.6124	1051.39	96.0941	up	uniquelyDA		NA	NA	NA	NA	NA	NA	NA	NA
11107	2.1744	1.1206	5.75e-05	4.24	932.91	498.319	up	uniquelyDA		NA	NA	NA	NA	NA	NA	NA	NA
7478	2.1742	1.1205	0.014847	1.8284	938.91	363.277	up	uniquelyDA		NA	NA	NA	NA	NA	NA	NA	NA
5204	2.1739	1.1203	0.0038206	2.4179	281.14	177.043	up	uniquelyDA		NA	NA	NA	NA	NA	NA	NA	NA
5289	2.1709	1.1183	0.000137	3.8645	298.52	203.058	up	uniquelyDA		NA	NA	NA	NA	NA	NA	NA	NA
10624	2.1601	1.1111	0.046667	1.331	1067.62	106.078	up	uniquelyDA		NA	NA	NA	NA	NA	NA	NA	NA
8148	2.1585	1.11	0.0055573	2.2551	978.13	345.264	up	uniquelyDA		NA	NA	NA	NA	NA	NA	NA	NA
10976	2.1543	1.1072	0.0066687	2.176	1079.76	535.158	up	uniquelyDA		NA	NA	NA	NA	NA	NA	NA	NA
1367	2.1516	1.1054	0.0040371	2.3939	701.66	386.198	up	uniquelyDA		NA	NA	NA	NA	NA	NA	NA	NA
3765	2.1417	1.0988	0.046749	1.3302	62.5	217.041	up	uniquelyDA		NA	NA	NA	NA	NA	NA	NA	NA
1660	2.1395	1.0973	0.0040356	2.3941	859.36	799.458	up	uniquelyDA		NA	NA	NA	NA	NA	NA	NA	NA
6756	2.1324	1.0925	0.0010091	2.9961	876.15	299.282	up	uniquelyDA		NA	NA	NA	NA	NA	NA	NA	NA
7367	2.1307	1.0913	0.0062609	2.2034	933.28	530.309	up	uniquelyDA		NA	NA	NA	NA	NA	NA	NA	NA
1815	2.1286	1.0899	0.011085	1.9553	916.56	341.329	up	uniquelyDA		NA	NA	NA	NA	NA	NA	NA	NA
6712	2.1237	1.0866	6.01e-05	4.2209	873.34	262.229	up	uniquelyDA		NA	NA	NA	NA	NA	NA	NA	NA
6009	2.1236	1.0865	0.012975	1.8869	701.97	194.13	up	uniquelyDA		NA	NA	NA	NA	NA	NA	NA	NA
4620	2.116	1.0813	0.0012965	2.8872	236.35	252.056	up	uniquelyDA		NA	NA	NA	NA	NA	NA	NA	NA
3328	2.0944	1.0665	0.0024285	2.6147	57.76	240.022	up	uniquelyDA		NA	NA	NA	NA	NA	NA	NA	NA
4302	2.0868	1.0613	0.016993	1.7697	211.83	321.023	up	uniquelyDA		NA	NA	NA	NA	NA	NA	NA	NA
7198	2.0863	1.061	0.0032206	2.4921	918.23	188.105	up	uniquelyDA		NA	NA	NA	NA	NA	NA	NA	NA
10651	2.0808	1.0571	0.013101	1.8827	1066.43	394.324	up	uniquelyDA		NA	NA	NA	NA	NA	NA	NA	NA
1816	2.079	1.0559	0.032137	1.493	916.88	335.25	up	uniquelyDA		NA	NA	NA	NA	NA	NA	NA	NA
7377	2.0776	1.0549	0.0035823	2.4458	932.94	533.357	up	uniquelyDA		NA	NA	NA	NA	NA	NA	NA	NA
10621	2.077	1.0545	0.035171	1.4538	1067.64	226.159	up	uniquelyDA		NA	NA	NA	NA	NA	NA	NA	NA
4138	2.0738	1.0522	0.010449	1.9809	159.88	284.271	up	uniquelyDA		NA	NA	NA	NA	NA	NA	NA	NA
10498	2.073	1.0517	0.0099577	2.0018	1062.81	698.518	up	uniquelyDA		NA	NA	NA	NA	NA	NA	NA	NA
7056	2.0564	1.0401	0.015182	1.8187	906.67	680.399	up	uniquelyDA		NA	NA	NA	NA	NA	NA	NA	NA
3845	2.052	1.037	0.0016807	2.7745	62.49	103.993	up	uniquelyDA		NA	NA	NA	NA	NA	NA	NA	NA
4019	2.0492	1.0351	0.0030034	2.5224	87.08	244.067	up	uniquelyDA		NA	NA	NA	NA	NA	NA	NA	NA
7573	2.0372	1.0266	0.03809	1.4192	947.53	296.235	up	uniquelyDA		NA	NA	NA	NA	NA	NA	NA	NA
2245	2.0357	1.0255	0.0056148	2.2507	1029.2	677.464	up	uniquelyDA		NA	NA	NA	NA	NA	NA	NA	NA
11108	2.0353	1.0252	0.0020676	2.6845	932.96	516.331	up	uniquelyDA		NA	NA	NA	NA	NA	NA	NA	NA
1172	2.0264	1.0189	0.011197	1.9509	520.53	329.116	up	uniquelyDA		NA	NA	NA	NA	NA	NA	NA	NA
10632	2.0256	1.0183	0.020821	1.6815	1066.12	210.162	up	uniquelyDA		NA	NA	NA	NA	NA	NA	NA	NA
150	2.0255	1.0183	0.013459	1.871	59.5	399.174	up	uniquelyDA		NA	NA	NA	NA	NA	NA	NA	NA
3323	2.0229	1.0164	0.0022538	2.6471	57.73	295.98	up	uniquelyDA		NA	NA	NA	NA	NA	NA	NA	NA
2399	2.0207	1.0149	3.91e-05	4.4078	1061.11	188.994	up	uniquelyDA		NA	NA	NA	NA	NA	NA	NA	NA
1168	2.0155	1.0112	0.0078133	2.1072	511.08	217.043	up	uniquelyDA		NA	NA	NA	NA	NA	NA	NA	NA
3320	2.0147	1.0106	0.021566	1.6662	57.39	398.082	up	uniquelyDA		NA	NA	NA	NA	NA	NA	NA	NA
1266	2.0094	1.0068	0.0032765	2.4846	622.87	325.098	up	uniquelyDA		NA	NA	NA	NA	NA	NA	NA	NA
7091	2.0069	1.005	0.022	1.6576	910.32	440.277	up	uniquelyDA		NA	NA	NA	NA	NA	NA	NA	NA
3604	0.38242	-1.3868	0.044561	1.351	62.35	285.104	down	uniquelyDA		Organic compounds	Organic acids and derivatives	Carboxylic acids and derivatives	Amino acids, peptides, and analogues	Amino acids and derivatives	Alkaloids	Nicotinic acid alkaloids	Pyridine alkaloids
5657	0.26534	-1.9141	0.0013035	2.8849	408.6	550.206	down	uniquelyDA		Organic compounds	Benzenoids	Benzene and substituted derivatives	NA	Benzene and substituted derivatives	Alkaloids	Nicotinic acid alkaloids	Pyridine alkaloids
419	0.25578	-1.967	0.0012315	2.9096	211.24	482.202	down	uniquelyDA		Organic compounds	Benzenoids	Benzene and substituted derivatives	Benzenesulfonamides	Benzenesulfonamides	Alkaloids	Nicotinic acid alkaloids	Phenylalanine-derived alkaloids
848	3.8781	1.9554	0.000704	3.1526	285.47	593.124	up	uniquelyDA		Organic compounds	Organohalogen compounds	Aryl halides	Aryl fluorides	Aryl fluorides	Alkaloids	Nicotinic acid alkaloids	Pyridine alkaloids
4741	2.5825	1.3687	0.0080172	2.096	243.44	396.099	up	uniquelyDA		Organic compounds	Benzenoids	Benzene and substituted derivatives	Benzenesulfonamides	Benzenesulfonamides	Alkaloids	Nicotinic acid alkaloids	Pyridine alkaloids
4559	0.42687	-1.2281	0.000995	3.0024	233.72	555.232	down	uniquelyDA		Organic compounds	Organic oxygen compounds	Organooxygen compounds	Carbohydrates and carbohydrate conjugates	Glycosylamines	Carbohydrates	Nucleosides	Purine nucleos(t)ides
5656	0.29125	-1.7797	0.0034349	2.4641	408.09	388.152	down	uniquelyDA		Organic compounds	Nucleosides, nucleotides, and analogues	5'-deoxyribonucleosides	NA	5'-deoxyribonucleosides	Alkaloids	Nucleosides	Purine nucleos(t)ides
6690	11.916	3.5748	6.45e-10	9.1903	869.86	310.214	up	uniquelyDA		Organic compounds	Lipids and lipid-like molecules	Fatty Acyls	Lineolic acids and derivatives	Lineolic acids and derivatives	Fatty acids	Octadecanoids	Other Octadecanoids
7299	5.579	2.48	2.29e-05	4.641	927.77	294.219	up	uniquelyDA		Organic compounds	Lipids and lipid-like molecules	Fatty Acyls	Lineolic acids and derivatives	Lineolic acids and derivatives	Fatty acids	Octadecanoids	Other Octadecanoids
5916	5.5766	2.4794	7.11e-06	5.1481	651.39	308.198	up	uniquelyDA		Organic compounds	Lipids and lipid-like molecules	Fatty Acyls	Eicosanoids	Prostaglandins and related compounds	Fatty acids	Octadecanoids	Phytoprostanes
6042	4.1338	2.0475	2.87e-05	4.5427	721.61	308.198	up	uniquelyDA		Organic compounds	Lipids and lipid-like molecules	Fatty Acyls	Eicosanoids	Prostaglandins and related compounds	Polyketides	Octadecanoids	Phytoprostanes
4784	0.47606	-1.0708	0.0028924	2.5387	245.55	701.29	down	uniquelyDA		Organic compounds	Organic acids and derivatives	Carboxylic acids and derivatives	Amino acids, peptides, and analogues	Alpha amino acids and derivatives	Polyketides	Oligopeptides	Cyclic peptides
604	0.40978	-1.2871	0.0060802	2.2161	235.6	761.312	down	uniquelyDA		Organic compounds	Organic acids and derivatives	Carboxylic acids and derivatives	Amino acids, peptides, and analogues	N-acyl-alpha amino acids and derivatives	Alkaloids	Oligopeptides	Depsipeptides
6403	15.283	3.9339	0.03794	1.4209	826.45	464.254	up	uniquelyDA		Organic compounds	Organic acids and derivatives	Carboxylic acids and derivatives	Amino acids, peptides, and analogues	N-acyl-alpha amino acids and derivatives	Polyketides	Oligopeptides	Cyclic peptides
4821	0.38004	-1.3958	0.033269	1.478	250.8	523.206	down	uniquelyDA		Organic compounds	Organic oxygen compounds	Organooxygen compounds	Carbohydrates and carbohydrate conjugates	Hexoses	Alkaloids	Ornithine alkaloids	Terpenoid tetrahydroisoquinoline alkaloids
4152	0.4715	-1.0847	0.013223	1.8787	168.77	222.046	down	uniquelyDA		Organic compounds	Organoheterocyclic compounds	Azoles	Thiazoles	Thiazolecarboxylic acids and derivatives	Shikimates and Phenylpropanoids	Peptide alkaloids	Simple amide alkaloids
1354	3.0864	1.6259	0.028363	1.5473	691.41	475.167	up	uniquelyDA		Organic compounds	Organic oxygen compounds	Organooxygen compounds	Carbohydrates and carbohydrate conjugates	Disaccharides	Shikimates and Phenylpropanoids	Phenolic acids (C6-C1)	Simple phenolic acids
7873	16.081	4.0073	0.046145	1.3359	964.55	746.499	up	uniquelyDA		Organic compounds	Lipids and lipid-like molecules	Fatty Acyls	Fatty alcohols	Fatty alcohols	Polyketides	Polyethers	Polyether ionophores
3877	0.3246	-1.6232	9.52e-06	5.0214	64.19	238.069	down	uniquelyDA		Organic compounds	Organic acids and derivatives	Hydroxy acids and derivatives	NA	Hydroxy acids and derivatives	Carbohydrates	Saccharides	Monosaccharides
6085	4.0263	2.0095	0.000217	3.6626	750.97	308.199	up	uniquelyDA		Organic compounds	Lipids and lipid-like molecules	Fatty Acyls	NA	Fatty Acyls	Fatty acids	Sesquiterpenoids	Prenyl quinone meroterpenoids
6112	3.9398	1.9781	6.37e-06	5.1958	760.29	224.141	up	uniquelyDA		Organic compounds	Benzenoids	Phenols	NA	Phenols	Terpenoids	Sesquiterpenoids	Catechols with side chains
6059	3.9316	1.9751	6.67e-06	5.1756	735.41	290.189	up	uniquelyDA		Organic compounds	Lipids and lipid-like molecules	NA	NA	Lipids and lipid-like molecules	Terpenoids	Sesquiterpenoids	Polyprenylated cyclic polyketides (Hop meroterpenoids)
10611	3.7084	1.8908	0.021149	1.6747	1067.65	208.146	up	uniquelyDA		Organic compounds	Organic acids and derivatives	Carboxylic acids and derivatives	Carboxylic acids	Carboxylic acids	Terpenoids	Sesquiterpenoids	Unsaturated fatty acids
7164	2.898	1.5351	0.00146	2.8356	915.21	276.208	up	uniquelyDA		Organic compounds	Benzenoids	NA	NA	Benzenoids	Terpenoids	Sesquiterpenoids	Unsaturated fatty acids
1089	0.27616	-1.8564	0.0013548	2.8681	446.97	284.065	down	uniquelyDA		Organic compounds	Organic acids and derivatives	Carboxylic acids and derivatives	Amino acids, peptides, and analogues	L-alpha-amino acids	Amino acids and Peptides	Small peptides	Aminoacids
5452	0.27493	-1.8629	0.000637	3.1958	327.36	229.167	down	uniquelyDA		Organic compounds	Organic acids and derivatives	Carboxylic acids and derivatives	Amino acids, peptides, and analogues	Amino acids	Fatty acids	Small peptides	Amino fatty acids
3977	0.086353	-3.5336	0.0015224	2.8175	87.06	307.083	down	uniquelyDA		Organic compounds	Organic acids and derivatives	Carboxylic acids and derivatives	Amino acids, peptides, and analogues	Oligopeptides	Amino acids and Peptides	Small peptides	Tripeptides
392	2.2807	1.1895	0.0080527	2.0941	197.39	296.049	up	uniquelyDA		Organic compounds	Organic acids and derivatives	Carboxylic acids and derivatives	Amino acids, peptides, and analogues	Alpha amino acids	Amino acids and Peptides	Small peptides	Aminoacids
7039	2.1396	1.0974	0.042031	1.3764	905.1	424.282	up	uniquelyDA		Organic compounds	Organic acids and derivatives	Carboxylic acids and derivatives	Amino acids, peptides, and analogues	N-acyl-alpha amino acids and derivatives	Amino acids and Peptides	Small peptides	Polyamines
7029	2.063	1.0447	0.0034814	2.4582	903.11	457.304	up	uniquelyDA		Organic compounds	Benzenoids	Phenol ethers	NA	Phenol ethers	Amino acids and Peptides	Small peptides	Phenylalanine-derived alkaloids
6242	0.35354	-1.5	0.0056623	2.247	809.93	637.324	down	uniquelyDA		Organic compounds	Lipids and lipid-like molecules	Steroids and steroid derivatives	NA	Steroids and steroid derivatives	Terpenoids	Steroids	Tetraketide meroterpenoids
9798	3.7789	1.918	0.02143	1.669	1039.43	566.41	up	uniquelyDA		Organic compounds	Lipids and lipid-like molecules	Steroids and steroid derivatives	NA	Steroids and steroid derivatives	Terpenoids	Steroids	Open-chain polyketides
9052	2.1386	1.0967	0.000929	3.0318	1012.25	466.365	up	uniquelyDA		Organic compounds	Lipids and lipid-like molecules	Steroids and steroid derivatives	Hydroxysteroids	Hydroxysteroids	Terpenoids	Steroids	Labdane diterpenoids
9509	4.5301	2.1795	0.043915	1.3574	1031.09	444.36	up	uniquelyDA		Organic compounds	Lipids and lipid-like molecules	Prenol lipids	Triterpenoids	Triterpenoids	Terpenoids	Triterpenoids	Oleanane triterpenoids
1302	6.1018	2.6092	6.8e-06	5.1677	653.77	372.122	up	uniquelyDA		Organic compounds	Organic acids and derivatives	Carboxylic acids and derivatives	Amino acids, peptides, and analogues	Phenylalanine and derivatives	Alkaloids	Tryptophan alkaloids	Quinazoline alkaloids
6678	2.6762	1.4202	0.0014053	2.8522	867.8	350.139	up	uniquelyDA		Organic compounds	Organic oxygen compounds	Organooxygen compounds	Ethers	Alkyl aryl ethers	Alkaloids	Tryptophan alkaloids	Quinoline alkaloids
1170	2.4948	1.3189	0.0025103	2.6003	511.19	218.051	up	uniquelyDA		Organic compounds	Benzenoids	Phenol ethers	Anisoles	Anisoles	Alkaloids	Tryptophan alkaloids	Simple indole alkaloids
776	0.27276	-1.8743	0.000472	3.3261	263.13	699.275	down	uniquelyDA		Organic compounds	Lipids and lipid-like molecules	Prenol lipids	Terpene glycosides	Terpene glycosides	Alkaloids	Tyrosine alkaloids	Isoquinoline alkaloids

## Sheet: Table S3-d_Feature table
FeatureID	RT	m.z	Name	kingdom_CF	superclass_CF	class_CF	subclass_CF	parent_CF	pathway_NP	superclass_NP	class_NP	X109_BrNig_B3_Mi_Root_2_GA5_1_10807	X113_BrNig_B3_Pp_Root_1_GB8_1_10819	X110_BrNig_B3_Mi_Root_3_GC2_1_10824	X114_BrNig_B3_Pp_Root_2_GC5_1_10827	X116_BrNig_B3_MP_Root_1_GC7_1_10829	X117_BrNig_B3_MP_Root_2_GD2_1_10832	X115_BrNig_B3_Pp_Root_3_BB2_1_10860	X111_BrNig_B3_Mi_Root_4_BC4_1_10872	X103_BrNig_B3_Ctrl_Root_1_BC8_1_10876	X118_BrNig_B3_MP_Root_3_BD6_1_10883	X105_BrNig_B3_Ctrl_Root_3_BE1_1_10886	X106_BrNig_B3_Ctrl_Root_4_RB1_1_10900	X107_BrNig_B3_Ctrl_Root_5_RB2_1_10904	X104_BrNig_B3_Ctrl_Root_2_RB7_1_10909	X112_BrNig_B3_Mi_Root_5_RE8_1_10935	X108_BrNig_B3_Mi_Root_1_GA5_1_10942
5535	352.28	343.109	Gluconasturtiin, desulfo fragment	Organic compounds	Organic oxygen compounds	Organooxygen compounds	Carbohydrates and carbohydrate conjugates	Hexoses	Amino acids and Peptides	Amino acid glycosides	Glucosinolates	803	522	735	684	320	439	607	427	370	542	614	863	758	588	732	1207
1068	422.86	369.088		Organic compounds	Organic oxygen compounds	Organooxygen compounds	Carbohydrates and carbohydrate conjugates	Hexoses	Amino acids and Peptides	Amino acid glycosides	Glucosinolates	1021	686	1480	516	1206	1452	265	639	327	1176	557	240	717	645	756	855
5252	288.79	539.183		Organic compounds	Organic oxygen compounds	Organooxygen compounds	Carbohydrates and carbohydrate conjugates	O-glycosyl compounds	Amino acids and Peptides	Amino acid glycosides	Cyanogenic glycosides	312	473	2115	584	969	593	566	474	521	247	1873	671	1187	1318	644	860
360	169.71	464.057		Organic compounds	Organic oxygen compounds	Organooxygen compounds	Carbohydrates and carbohydrate conjugates	Alkylglucosinolates	Amino acids and Peptides	Amino acid glycosides	Glucosinolates	1502	1235	947	1349	574	585	1409	1282	637	603	1099	1852	1518	1505	1381	1543
3790	61.81	359.034		Organic compounds	Organic oxygen compounds	Organooxygen compounds	Carbohydrates and carbohydrate conjugates	Alkylglucosinolates	Amino acids and Peptides	Amino acid glycosides	Glucosinolates	1941	2606	1956	2005	941	958	3062	1659	597	778	943	1676	1250	1294	517	1774
5498	340.36	551.201		Organic compounds	Organic oxygen compounds	Organooxygen compounds	Carbohydrates and carbohydrate conjugates	Hexoses	Alkaloids	Amino acid glycosides	Cyanogenic glycosides	2821	2529	2271	1723	798	1381	1570	1280	1517	1288	1458	2839	1779	1755	1687	2426
5056	267.36	424.111		Organic compounds	Organic acids and derivatives	Carboxylic acids and derivatives	Amino acids, peptides, and analogues	Amino acids and derivatives	Alkaloids	Amino acid glycosides	Cyanogenic glycosides	1149	1419	1826	1161	1129	1226	800	1350	892	743	2694	855	4970	4377	4075	3337
3657	62.41	359.034		Organic compounds	Organic oxygen compounds	Organooxygen compounds	Carbohydrates and carbohydrate conjugates	Alkylglucosinolates	Amino acids and Peptides	Amino acid glycosides	Glucosinolates	3291	3486	2877	3035	1026	1114	4471	2465	875	718	1097	2215	2057	1870	683	2452
5773	511.21	380.104		Organic compounds	Organic oxygen compounds	Organooxygen compounds	Carbohydrates and carbohydrate conjugates	Hexoses	Alkaloids	Amino acid glycosides	Pyridine alkaloids	1861	2566	1642	2727	3823	4577	2107	1570	1433	4467	2901	2457	1763	1614	1162	2252
3954	86.85	359.034	Sinigrin	Organic compounds	Organic oxygen compounds	Organooxygen compounds	Carbohydrates and carbohydrate conjugates	Alkylglucosinolates	Amino acids and Peptides	Amino acid glycosides	Glucosinolates	3613	4179	3134	3702	1472	1507	5318	2980	1153	1458	1462	2582	2826	2652	1162	2666
5311	303.05	478.072	Neoglucobrassicin	Organic compounds	Organic oxygen compounds	Organooxygen compounds	Carbohydrates and carbohydrate conjugates	Alkylglucosinolates	Amino acids and Peptides	Amino acid glycosides	Glucosinolates	6243	2678	5206	3217	1845	1714	2901	880	1004	1252	1735	4724	4078	3397	1506	4575
4937	260.34	478.066	4-Methoxyglucobrassicin	Organic compounds	Organic oxygen compounds	Organooxygen compounds	Carbohydrates and carbohydrate conjugates	Alkylglucosinolates	Amino acids and Peptides	Amino acid glycosides	Glucosinolates	4757	4053	4482	4093	4191	4048	4343	3978	4149	4199	4289	4650	4755	4647	5042	4986
355	168.54	368.103	Desulfo-Glucobrassicin	Organic compounds	Organic oxygen compounds	Organooxygen compounds	Carbohydrates and carbohydrate conjugates	Hexoses	Amino acids and Peptides	Amino acid glycosides	Glucosinolates	5429	5463	4093	5637	2255	2397	6413	5136	2660	2562	4763	7954	6189	5682	6091	6442
4855	253.25	846.132	gluconasturtiin, dimer	Organic compounds	Organic oxygen compounds	Organooxygen compounds	Carbohydrates and carbohydrate conjugates	Alkylglucosinolates	Amino acids and Peptides	Amino acid glycosides	Glucosinolates	5844	7558	7132	6719	4755	5453	5860	8021	5050	5091	5460	6226	7257	7073	8338	11529
756	259.69	382.119		Organic compounds	Organic oxygen compounds	Organooxygen compounds	Carbohydrates and carbohydrate conjugates	Hexoses	Alkaloids	Amino acid glycosides	Simple indole alkaloids	7274	7291	7339	6422	5186	5334	6540	5374	6848	5827	6891	7016	7129	7692	8418	7966
4145	168.68	384.099	4-Hydroxyglucobrassicin, desulfo fragment	Organic compounds	Organic oxygen compounds	Organooxygen compounds	Carbohydrates and carbohydrate conjugates	Cyanogenic glycosides	Amino acids and Peptides	Amino acid glycosides	Glucosinolates	21639	20403	15479	21157	9346	9720	22920	19410	10786	8623	17386	29694	24339	22304	22236	22877
5310	302.92	398.115		Organic compounds	Organic acids and derivatives	Carboxylic acids and derivatives	Amino acids, peptides, and analogues	Amino acids and derivatives	Alkaloids	Amino acid glycosides	Pyrimidine nucleos(t)ides	41843	23428	38716	25841	18996	16371	22355	9673	11502	12870	19011	35793	31801	28369	13586	35455
4844	253.39	343.109	Desulfogluconasturtiin	Organic compounds	Organic oxygen compounds	Organooxygen compounds	Carbohydrates and carbohydrate conjugates	Hexoses	Amino acids and Peptides	Amino acid glycosides	Glucosinolates	93091	111938	110466	103347	81059	91669	96524	127109	80412	82123	99272	103311	113849	105614	122364	165920
4364	218.32	551.222		Organic compounds	Organic oxygen compounds	Organooxygen compounds	Carbohydrates and carbohydrate conjugates	Aminocyclitol glycosides	Carbohydrates	Aminosugars and aminoglycosides	Amino cyclitols	1743	1639	932	2262	1380	1547	1887	1371	1274	1392	1640	1624	2248	1643	527	1336
4295	211.13	551.222		Organic compounds	Organic oxygen compounds	Organooxygen compounds	Carbohydrates and carbohydrate conjugates	Aminocyclitol glycosides	Carbohydrates	Aminosugars and aminoglycosides	Amino cyclitols	2141	1009	1241	1549	1194	1585	882	1095	687	1505	4105	1435	1923	1957	2149	1483
7151	914.34	595.258		Organic compounds	Lipids and lipid-like molecules	Fatty Acyls	Fatty amides	N-acyl amines	Fatty acids	Aminosugars and aminoglycosides	Aminosugars	1958	2154	2087	2326	1494	2204	1971	1457	797	1868	1951	2209	1766	1319	1077	1514
855	291.73	437.144		Organic compounds	Benzenoids	Benzene and substituted derivatives	Anilides	Anilides	Alkaloids	Aminosugars and aminoglycosides	Aminosugars	1509	2855	2190	1923	1633	2220	2067	1762	1144	2210	2490	3738	5080	4903	2512	3628
3958	87.01	279.131		Organic compounds	Organic acids and derivatives	Carboxylic acids and derivatives	Amino acids, peptides, and analogues	Alpha amino acids and derivatives	Amino acids and Peptides	Aminosugars and aminoglycosides	Dipeptides	8129	7710	11610	8309	6289	5041	4000	8692	3421	4363	4678	3743	5576	5212	3770	15177
5299	300.62	539.237		Organic compounds	Organic oxygen compounds	Organooxygen compounds	Carbohydrates and carbohydrate conjugates	Aminoglycosides	Terpenoids	Aminosugars and aminoglycosides	Aminosugars	16057	2359	13406	13223	3090	3652	6618	9696	5222	3119	11484	9471	7872	7006	4995	5230
5939	667.46	374.138		Organic compounds	Organoheterocyclic compounds	Benzodiazepines	NA	Benzodiazepines	Alkaloids	Anthranilic acid alkaloids	Benzodiazepine alkaloids	245	451	338	629	0	1543	618	455	248	1666	528	527	248	191	232	391
6417	831.9	428.21		Organic compounds	Organoheterocyclic compounds	Quinolines and derivatives	Quinolones and derivatives	Hydroquinolones	Alkaloids	Anthranilic acid alkaloids	Acridone alkaloids	1027	1102	520	1087	791	823	918	752	1082	825	918	1224	991	882	947	1095
5146	273.51	383.123		Organic compounds	Organic oxygen compounds	Organooxygen compounds	Carbohydrates and carbohydrate conjugates	Hexoses	Alkaloids	Anthranilic acid alkaloids	Cyanogenic glycosides	0	0	0	1496	1195	1607	1474	1339	0	1438	1930	2387	67	1171	0	1292
5043	264.24	402.131		Organic compounds	Benzenoids	Benzene and substituted derivatives	Benzoic acids and derivatives	Benzoic acids and derivatives	Alkaloids	Anthranilic acid alkaloids	Pyridine alkaloids	1000	1243	1399	1605	3014	1695	1517	681	821	611	1627	1331	2094	1584	604	1592
5910	648.18	318.135		Organic compounds	Benzenoids	NA	NA	Benzenoids	Alkaloids	Anthranilic acid alkaloids	Quinazoline alkaloids	1985	1191	1251	1214	1611	1919	1232	1114	1712	1709	1289	741	1572	1452	1415	2218
5255	291.68	420.116		Organic compounds	Benzenoids	Benzene and substituted derivatives	Nitrobenzenes	Nitrobenzenes	Alkaloids	Anthranilic acid alkaloids	Phenazine alkaloids	994	1736	1179	923	916	1580	1240	1024	774	1365	1308	1870	3214	2582	1586	2161
410	209.17	501.079		Organic compounds	Organoheterocyclic compounds	Benzothiazoles	NA	Benzothiazoles	Alkaloids	Anthranilic acid alkaloids	Quinazoline alkaloids	1960	1491	1424	1803	1684	1561	2609	1334	631	1240	4010	1997	762	658	2337	2536
4967	260.16	397.107		Organic compounds	Organoheterocyclic compounds	Quinolines and derivatives	Quinolones and derivatives	Hydroquinolones	Polyketides	Anthranilic acid alkaloids	Simple coumarins	2567	2135	2032	1952	1616	1727	2021	1747	2260	2127	2001	2178	2276	2143	2340	2441
1019	384.28	511.152		Organic compounds	Benzenoids	Benzene and substituted derivatives	Benzoic acids and derivatives	Benzoic acid esters	Alkaloids	Anthranilic acid alkaloids	Pyridine alkaloids	2631	391	2838	1622	1569	1416	2621	1267	1225	842	3221	1366	2800	2977	2539	4439
1333	678.5	382.144		Organic compounds	Organoheterocyclic compounds	Diazanaphthalenes	Benzodiazines	Quinoxalines	Alkaloids	Anthranilic acid alkaloids	Quinazoline alkaloids	1172	1654	1959	2038	2999	3811	1243	818	1609	3683	2989	3682	2716	2663	1078	1744
4234	201.31	354.107		Organic compounds	Organosulfur compounds	Thioethers	Aryl thioethers	Aryl thioethers	Alkaloids	Anthranilic acid alkaloids	Quinazoline alkaloids	1922	1803	2059	2675	384	1952	1966	2145	2034	2155	3016	2258	3705	3423	2906	3137
4608	235.92	425.053		Organic compounds	Benzenoids	Phenol ethers	Anisoles	Anisoles	Alkaloids	Anthranilic acid alkaloids	Pyridine alkaloids	3935	3394	3323	3678	2958	2953	4210	3664	4007	3035	4078	3848	3795	3619	3981	3531
4011	86.96	376.06		Organic compounds	Benzenoids	Benzene and substituted derivatives	Halobenzenes	Dichlorobenzenes	Alkaloids	Anthranilic acid alkaloids	Pyridine alkaloids	5549	5462	4447	4361	3532	2929	5332	4252	2603	2953	3814	4466	4078	4671	2457	4698
1449	760.18	449.205		Organic compounds	Organoheterocyclic compounds	Benzimidazoles	NA	Benzimidazoles	Alkaloids	Anthranilic acid alkaloids	Pyridine alkaloids	4622	5034	5165	4765	5036	4944	4882	4760	4760	4589	4882	4220	4150	4391	3540	3706
5368	314.01	362.1		Organic compounds	Organoheterocyclic compounds	Diazanaphthalenes	Benzodiazines	Benzodiazines	Alkaloids	Anthranilic acid alkaloids	Pyridine alkaloids	6769	3305	8495	6131	6279	4234	5569	16129	1235	2947	8807	6310	7135	6213	2339	4755
4407	220.92	388.1		Organic compounds	Benzenoids	Benzene and substituted derivatives	Benzenesulfonamides	Benzenesulfonamides	Alkaloids	Anthranilic acid alkaloids	Quinazoline alkaloids	4510	5557	7324	4760	4826	5230	5506	8610	2918	4013	7078	6980	5879	6268	9267	13249
2522	51.53	234.989		Organic compounds	Organoheterocyclic compounds	Benzothiazoles	NA	Benzothiazoles	Alkaloids	Anthranilic acid alkaloids	Phenazine alkaloids	5563	6663	6511	6468	6242	7176	6285	6657	5261	6755	5985	7503	7846	7287	7594	8030
5782	544.82	175.063	degradation product of 4MeOI3M, 4-Methoxyindole-3-methanol	Organic compounds	Organoheterocyclic compounds	Quinolines and derivatives	NA	Quinolines and derivatives	Alkaloids	Anthranilic acid alkaloids	Quinoline alkaloids	9359	8968	11734	6003	13614	17772	5150	4562	5354	16301	6006	2845	4563	5174	4752	8397
2347	1051.06	370.094		Organic compounds	Organic acids and derivatives	Carboxylic acids and derivatives	Amino acids, peptides, and analogues	Amino acids and derivatives	Alkaloids	Anthranilic acid alkaloids	Quinazoline alkaloids	37818	46130	48111	42136	36714	34099	52800	50026	35247	33608	54770	52615	52725	50624	52756	40843
4962	259.74	236.062	4-Methoxyglucobrassicin-Fragment (-SO3, -Hex)	Organic compounds	Benzenoids	Benzene and substituted derivatives	NA	Benzene and substituted derivatives	Alkaloids	Anthranilic acid alkaloids	Simple indole alkaloids	86935	85523	75234	69332	49787	56259	70939	54975	67275	56160	67294	72922	88483	78289	88048	112431
8711	1004.1	400.277		Organic compounds	Lipids and lipid-like molecules	Prenol lipids	Diterpenoids	Diterpenoids	Terpenoids	Apocarotenoids	Apocarotenoids (ÃŽÂ²-)	1085	1143	1522	1371	1019	933	724	1052	1065	1078	632	1302	786	597	569	1115
7500	943.23	360.215		Organic compounds	Organic oxygen compounds	Organooxygen compounds	Carbohydrates and carbohydrate conjugates	Hexoses	Fatty acids	Apocarotenoids	Open-chain polyketides	1752	2022	2091	1979	1741	2378	2592	1602	1988	1814	2708	2012	2269	2747	2645	2233
7772	959.2	444.36		Organic compounds	Benzenoids	Phenols	NA	Phenols	Polyketides	Aromatic polyketides	Catechols with side chains	741	1364	216	2835	866	1078	1472	1655	3704	2362	558	1770	1653	1414	2628	1792
4899	256.68	422.172		Organic compounds	Organic oxygen compounds	Organooxygen compounds	Ethers	Diarylethers	Shikimates and Phenylpropanoids	Aromatic polyketides	Depsidones	1941	2308	3245	2582	1794	2311	1570	2215	1060	2132	2755	3327	4440	4488	3689	3346
6689	869.63	252.172		Organic compounds	Benzenoids	NA	NA	Benzenoids	Polyketides	Aromatic polyketides	Simple aromatic polyketides	2860	6253	5062	3110	2699	3034	3475	4719	2145	0	5463	5339	3297	3620	4927	4230
9814	1040.16	444.36		Organic compounds	Benzenoids	Phenols	NA	Phenols	Polyketides	Aromatic polyketides	Catechols with side chains	20711	5197	2469	3989	6187	0	9346	0	9574	11246	14384	1941	12016	2660	1948	13683
1882	935.76	250.156		Organic compounds	Benzenoids	Phenol ethers	Anisoles	Anisoles	Polyketides	Aromatic polyketides	Simple aromatic polyketides	6032	6720	7098	6820	7069	7738	8164	5804	6400	6272	7455	7526	9098	8072	8510	7778
5291	300.25	236.105		Organic compounds	Organic oxygen compounds	Organooxygen compounds	Carbonyl compounds	Aryl alkyl ketones	Polyketides	Aromatic polyketides	Azaphilones	15874	3982	11670	15562	5192	5913	8916	13394	9678	5978	13611	10341	8841	8090	8678	5804
5618	386.03	234.089		Organic compounds	Benzenoids	Benzene and substituted derivatives	Acetophenones	Acetophenones	Polyketides	Aromatic polyketides	Simple phenolic acids	31825	22727	25766	33165	15489	9981	30447	25363	28497	4119	32798	29763	26811	25191	13819	24861
8818	1009.11	582.408		Organic compounds	Lipids and lipid-like molecules	Prenol lipids	Tetraterpenoids	Carotenoids	Terpenoids	Carotenoids (C40)	Carotenoids (C40, ÃŽÂ²-ÃŽÂ²)	1193	1414	1220	1681	1003	1503	1357	1110	1357	1393	833	1675	1487	1188	1110	1643
7426	937.57	584.422		Organic compounds	Lipids and lipid-like molecules	Prenol lipids	Tetraterpenoids	Xanthophylls	Terpenoids	Carotenoids (C40)	Carotenoids (C40, ÃŽÂ²-ÃŽÂ²)	2843	2602	2853	2731	3789	4165	0	2943	3593	4219	0	3960	0	0	0	4646
8927	1011.18	758.562		Organic compounds	Lipids and lipid-like molecules	Prenol lipids	Tetraterpenoids	Xanthophylls	Terpenoids	Carotenoids (C40)	Carotenoids (C40, ÃŽÂ²-ÃŽÂ²)	1513	831	6791	4043	2111	1811	5602	1620	2008	8628	3522	1023	2863	1332	4495	6662
7671	956.64	572.481		Organic compounds	Lipids and lipid-like molecules	Prenol lipids	NA	Prenol lipids	Terpenoids	Carotenoids (C40)	Diacylglycerols	6978	7892	5545	0	3708	6070	0	4389	5381	7644	0	3753	0	6235	5866	6494
7423	937.52	550.418		Organic compounds	Lipids and lipid-like molecules	Prenol lipids	Tetraterpenoids	Xanthophylls	Terpenoids	Carotenoids (C40)	Carotenoids (C40, ÃŽÂ²-ÃŽÂ²)	54862	42627	51445	45382	61124	77682	385	46108	75909	70596	218	66061	120	457	519	80621
7430	936.94	567.421		Organic compounds	Lipids and lipid-like molecules	Prenol lipids	NA	Prenol lipids	Fatty acids	Carotenoids (C40)	Acyclic triterpenoids	82486	63520	80068	70314	95267	106303	826	72634	102391	103633	515	92478	352	769	1099	100543
4769	245.56	236.105		Organic compounds	Benzenoids	NA	NA	Benzenoids	Polyketides	Chromanes	Azaphilones	12143	2222	7900	9815	4146	4934	7619	7730	7748	5117	8669	6063	6439	6587	7536	4041
772	262.02	469.099		Organic compounds	Organic acids and derivatives	Carboxylic acids and derivatives	Amino acids, peptides, and analogues	Amino acids and derivatives	Shikimates and Phenylpropanoids	Coumarins	Simple coumarins	452	558	771	601	283	187	244	215	192	96	773	162	1784	1791	1017	451
6117	762.29	414.218		Organic compounds	Benzenoids	Benzene and substituted derivatives	Benzoyl derivatives	Benzoyl derivatives	Shikimates and Phenylpropanoids	Coumarins	Simple coumarins	0	1261	1777	1859	0	656	627	1243	226	1092	576	154	0	1307	278	207
996	362.27	402.131		Organic compounds	Phenylpropanoids and polyketides	Coumarins and derivatives	NA	Coumarins and derivatives	Shikimates and Phenylpropanoids	Coumarins	Simple coumarins	787	1004	1264	1100	1454	1147	987	605	375	918	1435	856	1703	1198	644	1560
8030	974.39	488.254		Organic compounds	Organic oxygen compounds	Organooxygen compounds	Ethers	Alkyl aryl ethers	Shikimates and Phenylpropanoids	Coumarins	Simple coumarins	1458	1544	2254	1494	1775	2301	1151	1060	801	1915	1209	1804	1404	1190	682	1238
4149	167.93	367.096		Organic compounds	Benzenoids	NA	NA	Benzenoids	Shikimates and Phenylpropanoids	Coumarins	Isocoumarins	1963	1715	1603	1791	0	1367	1544	1668	1019	1115	1980	2033	1617	1791	1816	1884
7120	912.35	521.276		Organic compounds	Lipids and lipid-like molecules	Steroids and steroid derivatives	NA	Steroids and steroid derivatives	Fatty acids	Coumarins	Simple coumarins	2539	2581	1874	2277	2403	3019	3029	1505	1506	2918	2080	2554	1880	1654	1667	2251
2397	1060.99	388.127		Organic compounds	Benzenoids	Benzene and substituted derivatives	NA	Benzene and substituted derivatives	Amino acids and Peptides	Coumarins	Dipeptides	1439	2911	3085	2385	7466	6180	0	2782	3438	2369	0	4167	0	0	0	3647
4408	220.78	352.079		Organic compounds	Phenylpropanoids and polyketides	Coumarins and derivatives	Coumarin glycosides	Coumarin glycosides	Shikimates and Phenylpropanoids	Coumarins	Simple coumarins	2173	2287	3716	2257	2482	2490	2163	3821	1546	1998	3366	3193	2629	2958	3791	5845
469	218.17	622.202		Organic compounds	Organic acids and derivatives	Carboxylic acids and derivatives	Amino acids, peptides, and analogues	N-acyl-alpha amino acids	Amino acids and Peptides	Coumarins	Simple coumarins	1480	4453	6581	5023	2283	4425	1875	2790	1374	2703	3842	2231	20219	18007	12696	4627
5901	642.15	485.096		Organic compounds	Organic acids and derivatives	Carboxylic acids and derivatives	Amino acids, peptides, and analogues	Alpha amino acid esters	Polyketides	Coumarins	Isocoumarins	7823	6218	10822	1499	239	8883	5542	6750	3734	11470	7436	11648	14391	12763	5573	9981
5619	386.09	340.131		Organic compounds	Benzenoids	Phenol ethers	NA	Phenol ethers	Shikimates and Phenylpropanoids	Coumarins	Neolignans	27733	17471	20798	27734	10950	8133	25494	19390	19499	4136	27822	26764	20606	19290	9625	19842
1665	862.76	505.195		Organic compounds	Phenylpropanoids and polyketides	Coumarins and derivatives	NA	Coumarins and derivatives	Shikimates and Phenylpropanoids	Coumarins	Simple coumarins	23622	20980	21344	21444	21480	21475	19541	19342	17269	18001	17559	18899	18180	17238	16395	16715
5143	273.6	282.074		Organic compounds	Benzenoids	Phenol ethers	Anisoles	Anisoles	Polyketides	Cyclic polyketides	Phthalide derivatives	1201	918	1943	1114	1582	1869	1840	1358	626	1523	1174	1910	2303	2213	2366	3085
5381	319.43	210.089	Sinapyl alcohol	Organic compounds	Benzenoids	Benzene and substituted derivatives	NA	Benzene and substituted derivatives	Polyketides	Cyclic polyketides	NA	11908	15078	10827	9753	13017	16309	9384	12544	8256	16530	13917	9071	18798	17781	14301	19182
5872	630.16	557.183		Organic compounds	Organic oxygen compounds	Organooxygen compounds	Ethers	Alkyl aryl ethers	Terpenoids	Diterpenoids	Pregnane steroids	1219	606	586	762	0	671	575	449	567	519	548	0	726	754	665	884
8006	971.96	348.193		Organic compounds	Lipids and lipid-like molecules	NA	NA	Lipids and lipid-like molecules	Terpenoids	Diterpenoids	Prostaglandins	1218	1187	1309	1453	1269	1316	1602	1314	1272	1167	1552	1231	1281	1360	1534	1418
6908	889.73	610.394		Organic compounds	Lipids and lipid-like molecules	Fatty Acyls	Fatty acyl glycosides	Sophorolipids	Fatty acids	Diterpenoids	Labdane diterpenoids	1440	1406	1462	1309	1330	1435	1358	1384	1386	1371	1264	1695	1267	1953	1517	1726
6955	895.25	347.246		Organic compounds	Organic acids and derivatives	Carboxylic acids and derivatives	Amino acids, peptides, and analogues	Amino acids and derivatives	Alkaloids	Diterpenoids	Prostaglandins	1415	1236	1010	873	4477	6625	768	1300	787	6196	971	889	785	599	663	799
8318	988.56	404.256		Organic compounds	Lipids and lipid-like molecules	Prenol lipids	Diterpenoids	Kaurane diterpenoids	Terpenoids	Diterpenoids	Kaurane and Phyllocladane diterpenoids	634	2848	619	2811	735	2151	2280	2256	3119	2737	604	1675	2441	2332	2959	2858
9887	1045.78	434.324		Organic compounds	Lipids and lipid-like molecules	Fatty Acyls	Fatty alcohols	Fatty alcohols	Polyketides	Diterpenoids	Labdane diterpenoids	2638	2835	2565	2606	2406	2445	1661	2650	2406	2144	1820	2196	1689	1445	1723	2392
8042	975.11	457.341		Organic compounds	Lipids and lipid-like molecules	Fatty Acyls	Fatty amides	Fatty amides	Polyketides	Diterpenoids	Isariotin alkaloids	1775	1167	1802	1618	2372	3180	1673	1722	2570	2752	3162	3042	3992	4169	1853	2111
5138	271.47	358.141		Organic compounds	Benzenoids	NA	NA	Benzenoids	Terpenoids	Diterpenoids	Colensane and Clerodane diterpenoids	1543	2907	5456	2459	2934	1835	1990	2320	1781	805	4300	6546	5735	5028	1527	1698
6647	864.14	422.267		Organic compounds	Organic oxygen compounds	Organooxygen compounds	Carbohydrates and carbohydrate conjugates	Hexoses	Fatty acids	Diterpenoids	Labdane diterpenoids	2546	3400	5480	5154	8047	8220	4529	8929	2424	4311	2578	8972	3227	2093	2257	3162
8780	1008.19	422.267		Organic compounds	Organic oxygen compounds	Organooxygen compounds	Carbohydrates and carbohydrate conjugates	O-glycosyl compounds	Terpenoids	Diterpenoids	Labdane diterpenoids	615	4408	15728	21565	792	15022	642	19694	1512	8868	554	1088	385	552	544	866
5961	678.44	292.203		Organic compounds	Lipids and lipid-like molecules	Fatty Acyls	Eicosanoids	Prostaglandins and related compounds	Terpenoids	Diterpenoids	Other Octadecanoids	3212	4212	5468	5875	11099	17379	3531	2301	3816	16896	8926	13932	10477	9726	2411	4708
9176	1016.7	310.287		Organic compounds	Lipids and lipid-like molecules	Prenol lipids	Diterpenoids	Diterpenoids	Terpenoids	Diterpenoids	Labdane diterpenoids	13717	12786	13049	13219	13610	13381	13617	13496	13177	13777	13694	14070	13646	13987	14140	12915
6360	826.3	368.256		Organic compounds	Lipids and lipid-like molecules	Fatty Acyls	Eicosanoids	Prostaglandins and related compounds	Fatty acids	Eicosanoids	Prostaglandins	1699	1368	2341	1276	2510	3326	913	1360	757	3005	949	1120	1280	797	919	1289
6758	876.77	350.245		Organic compounds	Lipids and lipid-like molecules	Fatty Acyls	Eicosanoids	Eicosanoids	Fatty acids	Eicosanoids	Monoacylglycerols	867	1776	1260	2134	4681	4164	1641	1790	1264	3447	1475	1395	2066	1484	1618	2409
6472	836.4	336.266		Organic compounds	Lipids and lipid-like molecules	Fatty Acyls	Lineolic acids and derivatives	Lineolic acids and derivatives	Fatty acids	Eicosanoids	Prostaglandins	988	719	0	926	456	477	2625	601	517	509	2762	700	457	10729	19305	472
9591	1032.04	334.25		Organic compounds	Lipids and lipid-like molecules	Fatty Acyls	NA	Fatty Acyls	Fatty acids	Eicosanoids	Prostaglandins	9634	9641	10188	10867	10455	9824	5176	9797	10332	10501	4416	10485	0	3206	2238	10272
8467	991.91	334.25		Organic compounds	Lipids and lipid-like molecules	Fatty Acyls	Lineolic acids and derivatives	Lineolic acids and derivatives	Fatty acids	Eicosanoids	Wax monoesters	3188	14205	1907	14477	3189	12246	13308	12011	14869	15083	2441	8122	12047	14073	14908	14908
7425	937.2	296.271		Organic compounds	Lipids and lipid-like molecules	Fatty Acyls	Fatty acids and conjugates	Long-chain fatty acids	Fatty acids	Fatty Acids and Conjugates	Unsaturated fatty acids	321	250	298	415	215	202	1335	380	164	388	1603	151	188	966	1026	273
6000	696.04	214.157		Organic compounds	Lipids and lipid-like molecules	Fatty Acyls	Fatty acids and conjugates	Medium-chain fatty acids	Fatty acids	Fatty Acids and Conjugates	Hydroxy fatty acids	532	739	498	712	506	692	550	673	865	590	671	806	971	869	1115	787
5919	656.34	215.188		Organic compounds	Organic acids and derivatives	Carboxylic acids and derivatives	Amino acids, peptides, and analogues	Gamma amino acids and derivatives	Fatty acids	Fatty Acids and Conjugates	Amino fatty acids	588	659	560	862	621	554	539	728	932	486	684	1046	1158	1136	773	898
7325	931.59	371.34		Organic compounds	Organic acids and derivatives	Carboxylic acids and derivatives	Amino acids, peptides, and analogues	Amino acids	Fatty acids	Fatty Acids and Conjugates	Unsaturated fatty acids	732	881	837	795	1349	661	822	794	706	807	1066	787	921	800	1122	840
10534	1065.62	310.25		Organic compounds	Lipids and lipid-like molecules	Fatty Acyls	Fatty acids and conjugates	Long-chain fatty acids	Fatty acids	Fatty Acids and Conjugates	Oxo fatty acids	1820	1625	634	2215	2372	1025	538	1312	591	587	1729	586	486	621	698	2055
9153	1015.71	252.208		Organic compounds	Lipids and lipid-like molecules	Fatty Acyls	Fatty acids and conjugates	Long-chain fatty acids	Fatty acids	Fatty Acids and Conjugates	Unsaturated fatty acids	1807	1437	1917	1784	1733	1442	1932	1781	0	0	1652	1323	1709	0	0	1643
5490	338.81	292.153		Organic compounds	Lipids and lipid-like molecules	Fatty Acyls	Fatty acid esters	Fatty acid esters	Fatty acids	Fatty Acids and Conjugates	Dicarboxylic acids	1272	1426	1289	1245	1136	1339	1364	1280	1422	1304	1215	1180	1151	1455	1349	1292
10260	1056.08	282.256		Organic compounds	Lipids and lipid-like molecules	Fatty Acyls	Fatty acids and conjugates	Long-chain fatty acids	Fatty acids	Fatty Acids and Conjugates	Unsaturated fatty acids	1523	1441	1239	1398	1268	1248	1395	1288	1483	1479	1563	1297	1452	1456	1533	1227
10685	1069.57	280.24		Organic compounds	Lipids and lipid-like molecules	Fatty Acyls	Fatty acids and conjugates	Long-chain fatty acids	Fatty acids	Fatty Acids and Conjugates	Wax monoesters	1701	1535	1616	1795	1566	1881	1688	1625	1645	2026	1688	1756	1724	1738	1725	1655
5493	340.13	342.11		Organic compounds	Lipids and lipid-like molecules	Fatty Acyls	Fatty acids and conjugates	Medium-chain fatty acids	Fatty acids	Fatty Acids and Conjugates	Thia fatty acids	4017	3240	2830	2282	1031	2117	2371	2192	2154	2024	2437	3397	2520	2294	2432	3147
6007	701.75	294.219		Organic compounds	Lipids and lipid-like molecules	Fatty Acyls	Lineolic acids and derivatives	Lineolic acids and derivatives	Fatty acids	Fatty Acids and Conjugates	Other Octadecanoids	1349	1457	1562	1587	5311	8213	1682	799	1317	7812	2322	3263	0	2255	1121	1709
6074	744.24	228.173		Organic compounds	Lipids and lipid-like molecules	Fatty Acyls	NA	Fatty Acyls	Fatty acids	Fatty Acids and Conjugates	Unsaturated fatty acids	2919	3091	2588	3398	0	2820	2616	3046	2852	2516	3599	3005	3156	3115	3414	3442
8744	1005.95	284.234		Organic compounds	Lipids and lipid-like molecules	Fatty Acyls	Lineolic acids and derivatives	Lineolic acids and derivatives	Fatty acids	Fatty Acids and Conjugates	Epoxy fatty acids	3174	2819	2833	2621	3311	2591	2920	2467	3209	2587	2978	3035	2777	2655	3200	3012
9145	1015.1	282.255		Organic compounds	Lipids and lipid-like molecules	Fatty Acyls	Fatty acids and conjugates	Long-chain fatty acids	Fatty acids	Fatty Acids and Conjugates	Unsaturated fatty acids	3118	2723	3059	3283	3233	3185	3019	2874	2744	3430	2922	2989	2998	3142	3460	2769
10619	1067.61	243.183		Organic compounds	Organic acids and derivatives	Carboxylic acids and derivatives	Amino acids, peptides, and analogues	Amino acids	Fatty acids	Fatty Acids and Conjugates	Oxo fatty acids	8008	4641	7347	2461	10128	6329	958	4231	4019	3646	1871	937	788	1890	871	1823
10634	1067.17	227.189		Organic compounds	Organic acids and derivatives	Carboxylic acids and derivatives	Amino acids, peptides, and analogues	Amino acids	Fatty acids	Fatty Acids and Conjugates	Amino fatty acids	7958	5425	7836	3663	9538	6690	2403	5181	4637	4666	3269	2040	2152	3138	2164	2797
9083	1012.92	296.234		Organic compounds	Lipids and lipid-like molecules	Fatty Acyls	Lineolic acids and derivatives	Lineolic acids and derivatives	Fatty acids	Fatty Acids and Conjugates	Other Octadecanoids	5115	4802	5150	4336	4484	4711	5391	4686	4791	4726	4342	5470	5228	4917	5709	5042
10018	1048.91	280.24	Linoleic acid (analyte and contaminant)	Organic compounds	Lipids and lipid-like molecules	Fatty Acyls	Fatty acids and conjugates	Long-chain fatty acids	Fatty acids	Fatty Acids and Conjugates	Unsaturated fatty acids	4467	4739	4479	4953	7413	8150	6986	3956	3213	6519	5404	3907	5544	5071	5875	4146
7480	940.68	268.24		Organic compounds	Lipids and lipid-like molecules	Fatty Acyls	Fatty acids and conjugates	Long-chain fatty acids	Fatty acids	Fatty Acids and Conjugates	Unsaturated fatty acids	5141	5227	6204	5624	5844	6144	7172	4667	5473	5136	7350	6849	6883	7467	7456	7044
7015	903.59	278.224		Organic compounds	Lipids and lipid-like molecules	Fatty Acyls	Lineolic acids and derivatives	Lineolic acids and derivatives	Fatty acids	Fatty Acids and Conjugates	Unsaturated fatty acids	5269	4388	5021	4926	18949	18747	4367	3775	2784	16008	3713	3546	3507	3264	3776	3820
3601	62.56	196.042		Organic compounds	Lipids and lipid-like molecules	Fatty Acyls	Fatty acids and conjugates	Thia fatty acids	Fatty acids	Fatty Acids and Conjugates	Dicarboxylic acids	3471	5383	5903	7845	7387	6136	9226	6874	5430	5465	6740	7097	7814	9050	10915	7048
10920	1078.87	244.168		Organic compounds	Organic acids and derivatives	Hydroxy acids and derivatives	Medium-chain hydroxy acids and derivatives	Medium-chain hydroxy acids and derivatives	Fatty acids	Fatty Acids and Conjugates	Hydroxy fatty acids	10412	10077	11231	9711	12114	8840	3732	7910	9242	5205	7175	4838	6001	8023	6283	7028
10990	1078.95	243.183		Organic compounds	Organic acids and derivatives	Carboxylic acids and derivatives	Amino acids, peptides, and analogues	Alpha amino acids	Fatty acids	Fatty Acids and Conjugates	Aminoacids	16338	12669	17437	13501	16955	12957	4652	10915	12824	7656	10421	7133	8063	11488	9127	9928
6071	743.95	227.188		Organic compounds	Organic acids and derivatives	Carboxylic acids and derivatives	Amino acids, peptides, and analogues	Gamma amino acids and derivatives	Fatty acids	Fatty Acids and Conjugates	Amino fatty acids	10838	12347	10983	13451	11683	10799	10250	12232	12917	10367	12993	12504	13545	13483	14180	13641
2035	982.01	328.152		Organic compounds	Organic acids and derivatives	Carboxylic acids and derivatives	Tricarboxylic acids and derivatives	Tricarboxylic acids and derivatives	Polyketides	Fatty Acids and Conjugates	Open-chain polyketides	14062	13773	15034	14057	16143	13906	13221	13404	13333	15455	15943	16159	14739	14671	13894	14033
11007	1078.92	227.188		Organic compounds	Organic acids and derivatives	Carboxylic acids and derivatives	Amino acids, peptides, and analogues	Amino acids	Fatty acids	Fatty Acids and Conjugates	Unsaturated fatty acids	19834	15541	21987	17382	21798	16851	6952	14008	15256	9780	13090	9074	10379	14845	12045	14079
7806	961.24	428.365		Organic compounds	Lipids and lipid-like molecules	Fatty Acyls	Fatty acids and conjugates	Very long-chain fatty acids	Fatty acids	Fatty Acids and Conjugates	Unsaturated fatty acids	50649	10285	6362	1370	40145	2209	11842	1551	7305	8755	49361	5634	17916	12980	2289	16470
8888	1010.19	278.224		Organic compounds	Lipids and lipid-like molecules	Fatty Acyls	Lineolic acids and derivatives	Lineolic acids and derivatives	Fatty acids	Fatty Acids and Conjugates	Unsaturated fatty acids	84811	88382	108134	97195	144450	131679	74101	82641	59988	107645	95261	110763	110241	87649	78906	81907
10768	1072.8	540.372		Organic compounds	Organic oxygen compounds	Organooxygen compounds	Carbohydrates and carbohydrate conjugates	Carbohydrates and carbohydrate conjugates	Fatty acids	Fatty acyl glycosides	Ascarosides	930	873	1031	1025	1028	938	961	822	894	1035	943	979	961	920	1011	888
9993	1046.56	626.459		Organic compounds	Organic oxygen compounds	Organooxygen compounds	Carbohydrates and carbohydrate conjugates	Hexoses	Fatty acids	Fatty acyl glycosides	Fatty acyl glycosides of mono- and disaccharides	1100	1520	1259	1298	1090	1247	523	1185	1248	1295	500	1319	440	415	506	1173
7034	905.4	492.33		Organic compounds	Lipids and lipid-like molecules	Fatty Acyls	Fatty acyl glycosides	Alkyl glycosides	Fatty acids	Fatty acyl glycosides	Fatty acyl glycosides of mono- and disaccharides	1026	1031	2021	1617	3641	4201	833	1346	1229	2987	2516	2819	2855	2721	2189	2648
7033	905.33	654.384		Organic compounds	Lipids and lipid-like molecules	Saccharolipids	NA	Saccharolipids	Fatty acids	Fatty acyl glycosides	Fatty acyl glycosides of mono- and disaccharides	2245	2257	3873	2826	6601	7481	1390	2415	2037	6257	5060	4794	4983	5844	5032	5443
8490	993.85	538.408		Organic compounds	Organic oxygen compounds	Organooxygen compounds	Carbohydrates and carbohydrate conjugates	Hexoses	Fatty acids	Fatty acyl glycosides	Fatty acyl glycosides of mono- and disaccharides	4240	6622	3705	6381	4169	6352	6214	5841	7108	7487	4297	4858	6075	5982	6814	6999
8658	1005.21	538.408		Organic compounds	Organic oxygen compounds	Organooxygen compounds	Carbohydrates and carbohydrate conjugates	Hexoses	Fatty acids	Fatty acyl glycosides	Fatty acyl glycosides of mono- and disaccharides	7525	6531	7423	7031	6193	7548	6396	7180	7463	9126	6753	6229	6907	7863	7089	7525
4934	260.45	370.22		Organic compounds	Organic oxygen compounds	Organooxygen compounds	Carbohydrates and carbohydrate conjugates	Hexoses	Fatty acids	Fatty acyl glycosides	Fatty acyl glycosides of mono- and disaccharides	13056	11823	12459	11642	14104	12508	13297	12452	12525	12341	12594	12891	12142	12361	12991	11851
1534	802.96	326.001		Organic compounds	Organic acids and derivatives	Organic phosphoric acids and derivatives	Phosphate esters	Trialkyl phosphates	Fatty acids	Fatty acyls	Halogenated hydrocarbons	1357	1306	1433	1223	1366	1212	1372	1259	1214	1236	1439	1138	1374	1433	1210	1237
10684	1070.74	282.142		Organic compounds	Organic acids and derivatives	Organic thiophosphoric acids and derivatives	NA	Organic thiophosphoric acids and derivatives	Fatty acids	Fatty acyls	Fatty alcohols	1666	1428	1715	1647	1760	1385	1723	1528	1634	1618	0	1521	1732	1587	1710	1657
9929	1044.31	282.142		Organic compounds	Organic acids and derivatives	Organic thiophosphoric acids and derivatives	Thiophosphoric acid esters	Thiophosphoric acid esters	Fatty acids	Fatty acyls	Fatty alcohols	1323	1498	1430	1425	1439	1586	2163	1317	1458	1372	2148	1294	2116	2044	2164	1369
8390	991.26	302.245		Organic compounds	Lipids and lipid-like molecules	Glycerolipids	Monoradylglycerols	Monoacylglycerols	Fatty acids	Fatty acyls	Monoacylglycerols	718	555	895	500	9356	4916	423	511	466	5032	624	682	530	387	338	481
10227	1052.92	282.142		Organic compounds	Organosulfur compounds	Thioethers	Sulfur mustard compounds	Sulfur mustard compounds	Fatty acids	Fatty acyls	Fatty alcohols	2040	2021	1920	1987	1891	1895	2101	1902	2009	1910	2211	1992	1986	1971	2169	2052
10135	1052.15	264.244		Organic compounds	Lipids and lipid-like molecules	Fatty Acyls	NA	Fatty Acyls	Fatty acids	Fatty acyls	Unsaturated fatty acids	3237	2684	2772	2678	3128	3187	2894	3413	2903	3344	3271	2875	3037	3119	3063	3111
4594	236.06	206.058		Organic compounds	Organic oxygen compounds	Organooxygen compounds	Ethers	Ethers	Fatty acids	Fatty acyls	Halogenated hydrocarbons	6643	3366	3086	3059	3540	3614	3469	3351	3286	3292	3894	2952	4454	4369	3613	3081
9639	1034.37	312.266		Organic compounds	Lipids and lipid-like molecules	Glycerolipids	Monoradylglycerols	1-monoacylglycerols	Fatty acids	Fatty acyls	Wax monoesters	14283	7660	1493	9011	18623	11181	1756	10717	9267	1406	23192	9234	19911	19427	9847	9094
7536	944.54	282.142		Organic compounds	Organic acids and derivatives	Organic thiophosphoric acids and derivatives	Thiophosphoric acid esters	Thiophosphoric acid esters	Fatty acids	Fatty acyls	Fatty alcohols	12870	11629	15107	14874	16458	15637	17050	13524	15180	12665	18963	14777	18677	18809	18195	13779
2375	1058.39	347.318		Organic compounds	Lipids and lipid-like molecules	Fatty Acyls	Fatty amides	N-acyl amines	Fatty acids	Fatty amides	N-acyl amines	560	679	473	605	178	512	540	723	375	353	474	501	659	607	461	700
9184	1017.15	279.256		Organic compounds	Lipids and lipid-like molecules	Fatty Acyls	Fatty amides	Fatty amides	Fatty acids	Fatty amides	N-acyl amines	432	585	622	505	805	702	447	625	536	726	541	535	690	447	730	510
8221	984.2	253.24		Organic compounds	Lipids and lipid-like molecules	Fatty Acyls	Fatty amides	Fatty amides	Fatty acids	Fatty amides	N-acyl amines	569	639	677	536	728	799	542	653	524	723	706	562	604	614	542	671
7449	938.05	349.261		Organic compounds	Organic acids and derivatives	Carboxylic acids and derivatives	Amino acids, peptides, and analogues	Alpha amino acids and derivatives	Fatty acids	Fatty amides	N-acyl amines	427	564	326	306	1422	2414	258	479	259	1984	320	241	272	250	349	328
2452	1073.01	255.221		Organic compounds	Lipids and lipid-like molecules	Fatty Acyls	Fatty amides	Fatty amides	Fatty acids	Fatty amides	Primary amides	706	618	831	736	823	742	485	578	722	532	805	620	563	603	594	712
9264	1019.45	267.257		Organic compounds	Lipids and lipid-like molecules	NA	NA	Lipids and lipid-like molecules	Fatty acids	Fatty amides	N-acyl amines	640	757	770	678	707	651	697	771	650	789	812	759	718	621	753	697
7653	953.03	409.428		Organic compounds	Organic acids and derivatives	Carboxylic acids and derivatives	Amino acids, peptides, and analogues	Amino acids and derivatives	Fatty acids	Fatty amides	N-acyl amines	3671	835	1548	559	720	459	0	649	1236	0	509	0	0	0	1797	0
10594	1066.45	295.288		Organic compounds	Lipids and lipid-like molecules	Fatty Acyls	Fatty amides	N-acyl amines	Fatty acids	Fatty amides	N-acyl amines	686	570	751	709	824	651	705	606	694	646	738	869	881	909	1035	868
7802	961.17	323.281		Organic compounds	Lipids and lipid-like molecules	Fatty Acyls	Fatty amides	Fatty amides	Fatty acids	Fatty amides	N-acyl ethanolamines (endocannabinoids)	774	766	994	876	1124	809	1150	546	559	761	663	878	713	626	656	701
8750	1007.24	408.373		Organic compounds	Lipids and lipid-like molecules	Fatty Acyls	Fatty amides	Fatty amides	Fatty acids	Fatty amides	Piperidine alkaloids	382	576	310	1459	234	548	1275	412	911	1962	0	3478	621	369	827	489
9360	1023.52	428.311		Organic compounds	Organic acids and derivatives	Carboxylic acids and derivatives	Amino acids, peptides, and analogues	Alpha amino acids and derivatives	Alkaloids	Fatty amides	N-acyl amines	954	754	1179	0	659	1358	1008	1041	987	1229	959	504	1639	1041	982	973
1997	971.88	389.26		Organic compounds	Lipids and lipid-like molecules	NA	NA	Lipids and lipid-like molecules	Fatty acids	Fatty amides	N-acyl amines	842	896	841	593	2687	3331	587	882	453	3455	675	466	664	657	482	507
10601	1066.08	225.209		Organic compounds	Lipids and lipid-like molecules	Fatty Acyls	Fatty amides	N-acyl amines	Fatty acids	Fatty amides	Primary amides	1089	911	1019	1317	1325	1067	1209	1095	942	894	1219	1192	1332	1499	1224	1305
8038	974.55	373.261		Organic compounds	Organic acids and derivatives	Carboxylic acids and derivatives	Amino acids, peptides, and analogues	N-acyl-alpha amino acids and derivatives	Fatty acids	Fatty amides	N-acyl amines	1347	1263	977	1282	0	1109	1195	1635	1249	1263	1133	1152	1745	1494	1031	1356
10924	1079.02	367.309		Organic compounds	Lipids and lipid-like molecules	Fatty Acyls	Fatty amides	N-acyl amines	Fatty acids	Fatty amides	N-acyl ethanolamines (endocannabinoids)	1597	1378	1615	1326	1719	1121	792	1225	1248	923	1135	761	890	1240	1036	1330
10289	1055.13	338.279		Organic compounds	Lipids and lipid-like molecules	Fatty Acyls	NA	Fatty Acyls	Alkaloids	Fatty amides	Primary amides	1329	1751	1509	1234	1431	1323	999	1567	1256	1449	1097	1291	0	1104	1185	1238
10845	1075.27	353.277		Organic compounds	Lipids and lipid-like molecules	Fatty Acyls	Fatty acyl thioesters	Fatty acyl thioesters	Fatty acids	Fatty amides	N-acyl amines	1480	1423	1385	1048	1375	1416	1475	1288	1126	1470	1245	1492	1354	1614	1485	1538
10029	1048.62	311.317		Organic compounds	Lipids and lipid-like molecules	Fatty Acyls	Fatty amides	N-acyl amines	Fatty acids	Fatty amides	N-acyl amines	1363	1367	1510	1675	1405	1153	1511	1565	1419	1375	1487	1282	1652	1616	1387	1253
9450	1028.84	324.189		Organic compounds	Organic acids and derivatives	Carboxylic acids and derivatives	Amino acids, peptides, and analogues	Amino acids and derivatives	Fatty acids	Fatty amides	N-acyl amines	1402	1320	1555	1472	1444	1523	1542	1440	1425	1332	1586	1605	1700	1452	1648	1381
10247	1053.56	336.254		Organic compounds	Organoheterocyclic compounds	Azoles	NA	Azoles	Alkaloids	Fatty amides	Imidazole alkaloids	0	2253	1578	0	2292	2525	2212	1647	1575	1851	1507	1722	2542	1395	1786	0
10691	1068.63	336.26		Organic compounds	Lipids and lipid-like molecules	Fatty Acyls	Fatty amides	N-acyl amines	Alkaloids	Fatty amides	Primary amides	2762	2564	0	3303	3864	0	0	2051	1589	1885	3116	0	0	0	0	3769
9265	1019.48	353.277		Organic compounds	Benzenoids	Thiophenol ethers	NA	Thiophenol ethers	Fatty acids	Fatty amides	N-acyl amines	1505	1449	1493	1421	1434	1633	1600	1635	1718	1658	1460	1677	1556	1721	1972	1817
9154	1015.72	380.342		Organic compounds	Lipids and lipid-like molecules	Fatty Acyls	Fatty amides	Fatty amides	Fatty acids	Fatty amides	N-acyl amines	2205	588	0	2778	2401	1378	0	1802	2819	0	2115	2310	2236	1555	3077	1732
6355	824.92	321.266		Organic compounds	Organic acids and derivatives	Carboxylic acids and derivatives	Amino acids, peptides, and analogues	Amino acids, peptides, and analogues	Fatty acids	Fatty amides	N-acyl ethanolamines (endocannabinoids)	2177	1998	2080	1919	2661	2970	1277	1901	729	2526	1144	1390	1328	1105	947	1596
7446	938	413.26		Organic compounds	Lipids and lipid-like molecules	Fatty Acyls	Fatty amides	N-acyl amines	Fatty acids	Fatty amides	N-acyl amines	1243	1422	976	842	4543	7635	796	1129	610	5223	935	608	565	581	784	855
7882	964.91	353.276		Organic compounds	Lipids and lipid-like molecules	Fatty Acyls	Fatty amides	Fatty amides	Fatty acids	Fatty amides	N-acyl amines	2590	1800	1340	1212	1345	1174	1567	1271	1461	2655	3063	1481	1288	1329	1445	3792
8646	1002.27	279.256		Organic compounds	Lipids and lipid-like molecules	Fatty Acyls	Fatty amides	Fatty amides	Fatty acids	Fatty amides	N-acyl amines	1748	1261	2008	1437	3001	2854	1382	2156	1213	2221	2244	2083	2508	2326	1771	0
8239	983.57	335.318		Organic compounds	Lipids and lipid-like molecules	Fatty Acyls	Fatty amides	Fatty amides	Fatty acids	Fatty amides	N-acyl amines	1706	1960	2273	2011	3206	1736	1679	1785	1799	2100	2053	1944	1852	1908	1864	1682
10053	1048.01	596.476		Organic compounds	Organic acids and derivatives	Carboxylic acids and derivatives	Amino acids, peptides, and analogues	Amino acids and derivatives	Fatty acids	Fatty amides	N-acyl amines	692	1518	2532	1133	3643	1078	2363	2956	6224	1116	1475	1240	1437	1415	4158	4828
9776	1038.65	495.38		Organic compounds	Organic acids and derivatives	Carboxylic acids and derivatives	Amino acids, peptides, and analogues	Peptides	Amino acids and Peptides	Fatty amides	N-acyl amines	2317	2483	2199	1990	2064	1913	1377	2117	2064	1918	4969	1172	4712	5322	5261	2139
8502	997.47	335.318		Organic compounds	Lipids and lipid-like molecules	Fatty Acyls	Fatty amides	N-acyl amines	Fatty acids	Fatty amides	N-acyl amines	3621	2803	2734	3454	3623	2423	2379	2604	2883	2357	3568	3095	2529	3043	2312	2727
6954	895.28	411.244		Organic compounds	Lipids and lipid-like molecules	Fatty Acyls	Fatty amides	Fatty amides	Fatty acids	Fatty amides	N-acyl amines	2801	2841	2655	2237	12625	16651	1538	3261	1680	15131	2177	1700	2007	1733	1681	1977
9152	1015.47	567.419		Organic compounds	Lipids and lipid-like molecules	Prenol lipids	NA	Prenol lipids	Fatty acids	Fatty amides	N-acyl amines	8530	5076	3803	2718	5709	8895	0	5037	9452	9488	0	6548	0	0	0	12192
8753	1006.22	392.288		Organic compounds	Organic acids and derivatives	Carboxylic acids and derivatives	Amino acids, peptides, and analogues	Amino acids and derivatives	Fatty acids	Fatty amides	N-acyl amines	5978	4965	4602	3232	4988	4303	5978	3800	4738	4188	5981	5621	5528	5040	5387	4772
10043	1048.12	319.285		Organic compounds	Lipids and lipid-like molecules	Fatty Acyls	Fatty amides	N-acyl amines	Fatty acids	Fatty amides	N-acyl amines	10556	13129	4038	5577	12253	13608	9324	4521	1613	8705	1992	1586	2797	3101	2024	2985
10612	1067.41	197.178		Organic compounds	Organic acids and derivatives	Carboxylic acids and derivatives	Carboxylic acid derivatives	Carboxylic acid amides	Fatty acids	Fatty amides	Primary amides	8118	6792	8315	6187	8943	7506	5749	6543	6768	7309	6243	5481	5663	5858	5682	5848
10514	1062.68	567.422		Organic compounds	Organic acids and derivatives	Organic phosphoric acids and derivatives	Phosphate esters	Phosphoethanolamines	Fatty acids	Fatty amides	N-acyl amines	9796	8452	8078	5100	14126	13258	0	7538	9142	17813	0	8408	0	0	0	12599
1632	843.59	233.154		Organic compounds	Lipids and lipid-like molecules	Fatty Acyls	Fatty amides	Fatty amides	Fatty acids	Fatty amides	Primary amides	8560	8501	5121	8808	2167	9438	7798	6113	8828	6912	9572	8282	5885	9044	8458	7920
6700	869.36	353.277		Organic compounds	Organoheterocyclic compounds	Azoles	NA	Azoles	Fatty acids	Fatty amides	N-acyl amines	11598	11054	0	11646	10879	10909	11256	11207	11920	11107	11505	11759	10899	11965	0	12322
8092	977.46	269.271		Organic compounds	Lipids and lipid-like molecules	Fatty Acyls	Fatty amides	N-acyl amines	Fatty acids	Fatty amides	N-acyl amines	11136	9525	10285	11082	10650	9708	10911	11374	10245	10050	11870	11754	11487	10913	11376	10857
2463	1076.26	283.287		Organic compounds	Lipids and lipid-like molecules	Fatty Acyls	Fatty amides	Fatty amides	Fatty acids	Fatty amides	N-acyl amines	11776	11434	11418	11312	11338	11216	11241	11401	11247	11423	11551	12398	11477	10848	10984	11048
10720	1071.45	311.318		Organic compounds	Lipids and lipid-like molecules	Fatty Acyls	Fatty amides	Fatty amides	Fatty acids	Fatty amides	Primary amides	12586	14918	15034	16140	15156	9430	11947	12075	7680	8829	8699	12304	7380	11343	10399	9760
8520	995.86	511.409		Organic compounds	Organic acids and derivatives	Carboxylic acids and derivatives	Amino acids, peptides, and analogues	Alpha amino acids and derivatives	Amino acids and Peptides	Fatty amides	Monocyclic guanidine alkaloids	13991	10039	13933	9696	15286	11089	11196	12177	9473	9378	14012	14834	11398	8663	10310	10213
9525	1029.2	594.465		Organic compounds	Lipids and lipid-like molecules	Fatty Acyls	Fatty amides	N-acyl amines	Fatty acids	Fatty amides	N-acyl amines	16377	19870	17979	16457	17267	19218	5607	16526	15771	17728	8468	18308	1286	6459	7649	16146
10610	1067.64	225.172		Organic compounds	Organic acids and derivatives	Carboxylic acids and derivatives	Amino acids, peptides, and analogues	Amino acids and derivatives	Fatty acids	Fatty amides	Primary amides	33064	19196	32348	9759	38311	23462	3597	15642	16999	14954	7586	2398	2571	7152	3156	7482
7939	969.41	227.225		Organic compounds	Organic nitrogen compounds	Organonitrogen compounds	NA	Organonitrogen compounds	Fatty acids	Fatty amides	Primary amides	16608	16635	16471	17492	18613	16551	17894	16831	17155	17481	20260	17503	18331	18282	18213	17587
10201	1052.3	281.271		Organic compounds	Lipids and lipid-like molecules	NA	NA	Lipids and lipid-like molecules	Fatty acids	Fatty amides	N-acyl amines	19672	14989	15195	17598	20501	19758	15820	18474	15410	19249	17837	19470	20058	17653	17655	19973
8804	1009.2	227.225		Organic compounds	Lipids and lipid-like molecules	Fatty Acyls	Fatty amides	N-acyl amines	Fatty acids	Fatty amides	Primary amides	17178	17426	19298	18695	19936	16949	18947	18072	18335	18510	20164	20406	19844	19294	19042	19546
7912	967.05	567.421		Organic compounds	Lipids and lipid-like molecules	NA	NA	Lipids and lipid-like molecules	Fatty acids	Fatty amides	N-acyl amines	32673	21563	21241	25045	28224	37005	177	27639	27209	33137	221	34231	0	186	243	37577
10468	1063.22	381.397		Organic compounds	Lipids and lipid-like molecules	Fatty Acyls	Fatty amides	N-acyl amines	Fatty acids	Fatty amides	N-acyl amines	16548	43625	31608	325	22872	306	24815	581	97894	15237	271	64704	136	11004	310	6187
9441	1028.36	325.293		Organic compounds	Lipids and lipid-like molecules	Fatty Acyls	Fatty amides	N-acyl amines	Fatty acids	Fatty amides	N-acyl ethanolamines (endocannabinoids)	24464	36523	29311	18489	35624	42635	10596	19469	8927	37313	11853	19902	14727	12209	9435	17999
9101	1016.09	299.282		Organic compounds	Organic nitrogen compounds	Organonitrogen compounds	Amines	N-acylethanolamines	Fatty acids	Fatty amides	N-acyl ethanolamines (endocannabinoids)	52080	50489	59045	49774	65815	70273	50995	52782	43207	67105	48648	51753	56231	55251	50260	49452
7357	934.61	321.266		Organic compounds	Lipids and lipid-like molecules	Fatty Acyls	Fatty amides	N-acyl amines	Fatty acids	Fatty amides	N-acyl ethanolamines (endocannabinoids)	48631	59135	89419	54670	88684	95017	42113	42884	28256	67360	61062	54714	76318	70627	57970	59844
9975	1046.01	381.303		Organic compounds	Benzenoids	NA	NA	Benzenoids	Fatty acids	Fatty amides	N-acyl amines	97734	123245	42360	50082	33822	42243	72308	70815	18859	31826	102151	36206	117891	157385	52659	39894
9506	1030.77	355.344		Organic compounds	Lipids and lipid-like molecules	Fatty Acyls	Fatty amides	N-acyl amines	Fatty acids	Fatty amides	N-acyl ethanolamines (endocannabinoids)	85036	82726	83812	84352	84703	81268	76128	82023	83083	77627	75642	81949	79002	75270	77113	75695
8089	978.05	323.282		Organic compounds	Lipids and lipid-like molecules	Fatty Acyls	Fatty amides	N-acyl amines	Fatty acids	Fatty amides	N-acyl ethanolamines (endocannabinoids)	123004	116363	110630	95892	159429	191841	77270	64556	51350	173020	72923	79185	80314	72601	79833	101885
2423	1066.64	337.334		Organic compounds	Lipids and lipid-like molecules	Fatty Acyls	Fatty amides	N-acyl amines	Fatty acids	Fatty amides	N-acyl amines	360029	300830	385089	471648	529411	345095	365482	351599	324775	248178	361268	417080	457074	486503	436502	398478
9841	1043.83	273.266		Organic compounds	Lipids and lipid-like molecules	Fatty Acyls	Fatty amides	Fatty amides	Fatty acids	Fatty amides	Sphingoid bases	364557	349243	354533	373526	339811	358625	572666	423538	324301	366570	575330	313613	586341	581221	579023	345622
5949	674.99	276.12		Organic compounds	Lipids and lipid-like molecules	Fatty Acyls	Fatty acid esters	Fatty acid esters	Fatty acids	Fatty esters	Wax monoesters	976	900	921	945	659	732	700	868	864	787	939	939	1267	1115	1108	791
8377	990.76	400.281		Organic compounds	Lipids and lipid-like molecules	Fatty Acyls	Fatty acid esters	Fatty acid esters	Fatty acids	Fatty esters	Wax monoesters	1931	798	3302	1229	1746	898	551	643	296	704	1017	853	743	518	283	820
9112	1014.05	334.285		Organic compounds	Organic acids and derivatives	Carboxylic acids and derivatives	Amino acids, peptides, and analogues	Amino acids and derivatives	Fatty acids	Fatty esters	Wax monoesters	1141	959	1205	1400	1169	885	1113	1046	1033	904	1317	1144	990	1304	998	1243
7880	964.55	294.255		Organic compounds	Lipids and lipid-like molecules	Fatty Acyls	Lineolic acids and derivatives	Lineolic acids and derivatives	Fatty acids	Fatty esters	Wax monoesters	1067	963	1051	1030	1152	764	1454	1058	0	965	1711	998	1047	2336	2351	893
705	253.54	783.202		Organic compounds	Lipids and lipid-like molecules	Fatty Acyls	Fatty amides	N-acyl amines	Fatty acids	Fatty esters	Fatty acyl CoAs	2630	2735	2874	3068	3214	2722	2459	2615	2743	2906	3045	2992	2846	3100	2629	3041
8812	1009.01	326.246		Organic compounds	Lipids and lipid-like molecules	Fatty Acyls	Fatty acid esters	Fatty acid esters	Fatty acids	Fatty esters	Wax diesters	3337	2983	3807	2965	5353	3334	2842	2597	0	3175	3633	0	4000	3619	3329	3025
9845	1042.19	402.298		Organic compounds	Lipids and lipid-like molecules	Glycerolipids	Triradylcglycerols	Triacylglycerols	Fatty acids	Fatty esters	Macrotetrolides	3002	2845	2625	2843	2800	2750	6185	3001	2814	2959	5512	2573	5527	5594	6277	3198
9098	1014.22	284.271		Organic compounds	Lipids and lipid-like molecules	Fatty Acyls	Fatty acids and conjugates	Long-chain fatty acids	Fatty acids	Fatty esters	Wax monoesters	4318	4534	5215	5257	3786	4468	5484	5352	4057	5507	5646	3649	3005	5770	4570	4138
8196	982.02	402.225		Organic compounds	Organic acids and derivatives	Carboxylic acids and derivatives	Tricarboxylic acids and derivatives	Tricarboxylic acids and derivatives	Fatty acids	Fatty esters	Wax monoesters	8050	7109	8835	7196	8138	7825	7526	7501	6898	8092	8395	8455	7633	7905	7972	8131
9924	1044.45	314.245		Organic compounds	Lipids and lipid-like molecules	Fatty Acyls	Fatty acid esters	Fatty acid esters	Fatty acids	Fatty esters	Wax monoesters	8435	7935	8726	9132	8269	8692	10759	9550	8391	8086	9538	7708	10809	10120	10445	7834
8757	1006.5	370.308		Organic compounds	Lipids and lipid-like molecules	Fatty Acyls	Fatty acid esters	Fatty acid esters	Fatty acids	Fatty esters	Wax monoesters	23269	19706	22012	18768	23557	19799	22282	20545	20950	21944	23892	23529	21535	20851	22904	20162
357	168.68	481.083		Organic compounds	Phenylpropanoids and polyketides	Stilbenes	NA	Stilbenes	Shikimates and Phenylpropanoids	Flavonoids	Simple coumarins	991	942	589	902	388	339	1030	843	302	374	812	1719	1505	1144	1162	1068
5753	474.76	354.11		Organic compounds	Benzenoids	Phenol ethers	Anisoles	Anisoles	Shikimates and Phenylpropanoids	Flavonoids	Simple coumarins	377	1379	923	485	187	1304	1059	1606	263	1497	501	534	941	960	532	2317
5903	641.86	340.131		Organic compounds	Benzenoids	Phenol ethers	NA	Phenol ethers	Shikimates and Phenylpropanoids	Flavonoids	Chalcones	1127	1141	1171	1304	1714	1070	1489	910	1141	765	945	903	1361	1310	1476	1414
2455	1074.35	226.079		Organic compounds	Benzenoids	Benzene and substituted derivatives	Benzoyl derivatives	Benzoyl derivatives	Shikimates and Phenylpropanoids	Flavonoids	Chalcones	1129	1185	1123	1327	1299	1290	1163	1455	1094	1317	1378	1234	1276	1264	1312	1088
4979	259.99	495.098		Organic compounds	Organic acids and derivatives	Organic sulfonic acids and derivatives	Organosulfonic acids and derivatives	Arylsulfonic acids and derivatives	Shikimates and Phenylpropanoids	Flavonoids	Simple coumarins	2421	3241	3498	3792	4070	2742	3157	3245	3486	3725	3372	3415	3138	3439	3079	3085
1744	894.36	326.07		Organic compounds	Organic acids and derivatives	Organic phosphoric acids and derivatives	Phosphate esters	Aryl phosphotriesters	Shikimates and Phenylpropanoids	Flavonoids	Anthraquinones and anthrones	4203	4619	4220	4748	4116	4409	4321	4193	5291	4409	4709	4617	4424	4113	5124	4651
7599	947.05	576.511		Organic compounds	Lipids and lipid-like molecules	Fatty Acyls	Lineolic acids and derivatives	Lineolic acids and derivatives	Fatty acids	Glycerolipids	Diacylglycerols	851	664	824	0	0	587	786	690	673	720	0	703	676	890	624	910
8507	994.81	576.511		Organic compounds	Lipids and lipid-like molecules	Glycerolipids	Diradylglycerols	Diacylglycerols	Fatty acids	Glycerolipids	Triacylglycerols	1143	691	1188	0	757	0	0	717	680	589	716	727	700	757	788	693
7765	959.91	576.512		Organic compounds	Lipids and lipid-like molecules	Glycerolipids	Diradylglycerols	1,2-diacylglycerols	Fatty acids	Glycerolipids	Diacylglycerols	848	874	721	0	588	0	764	731	874	723	576	693	777	916	697	831
6859	888.02	654.384		Organic compounds	Lipids and lipid-like molecules	Fatty Acyls	Fatty acyl glycosides	Sophorolipids	Fatty acids	Glycerolipids	Glycosylmonoacylglycerols	448	451	891	555	1172	1338	346	489	428	912	631	850	664	379	861	421
7301	927.88	838.49		Organic compounds	Lipids and lipid-like molecules	Glycerolipids	Glycosylglycerols	Sulfoquinovosyldiacylglycerols	Fatty acids	Glycerolipids	Glycosyldiacylglycerols	592	648	781	1101	1021	672	638	777	837	708	618	654	850	715	200	484
6573	854.65	326.245		Organic compounds	Lipids and lipid-like molecules	Glycerolipids	Monoradylglycerols	1-monoacylglycerols	Fatty acids	Glycerolipids	Monoacylglycerols	585	733	807	805	1152	1000	497	694	596	720	876	907	572	622	879	629
6558	848.35	336.266		Organic compounds	Lipids and lipid-like molecules	Glycerolipids	Monoradylglycerols	Monoacylglycerols	Fatty acids	Glycerolipids	Monoacylglycerols	654	731	410	593	385	445	782	525	524	0	896	500	599	2351	2788	0
7148	915.95	324.23		Organic compounds	Lipids and lipid-like molecules	Glycerolipids	NA	Glycerolipids	Fatty acids	Glycerolipids	Monoacylglycerols	460	510	596	477	531	1444	309	347	335	1784	442	467	1351	1092	1726	399
2428	1067.5	629.504		Organic compounds	Lipids and lipid-like molecules	Steroids and steroid derivatives	NA	Steroids and steroid derivatives	Terpenoids	Glycerolipids	Diacylglycerols	1229	792	222	778	1000	0	799	742	766	817	1042	842	1109	896	757	763
6858	888	492.33		Organic compounds	Lipids and lipid-like molecules	Glycerolipids	Glycosylglycerols	Glycosylglycerols	Fatty acids	Glycerolipids	Glycosylmonoacylglycerols	549	510	1179	740	1444	1237	352	619	625	1159	676	955	743	651	989	726
10176	1052.27	582.428		Organic compounds	Lipids and lipid-like molecules	Glycerolipids	Diradylglycerols	Diacylglycerols	Fatty acids	Glycerolipids	Diacylglycerols	895	961	787	969	925	1275	736	1128	1143	912	0	895	656	752	881	1013
10881	1076.24	576.509		Organic compounds	Lipids and lipid-like molecules	Glycerolipids	Diradylglycerols	Diacylglycerols	Fatty acids	Glycerolipids	Diacylglycerols	1230	1011	746	646	934	834	1064	834	764	801	730	1027	1086	804	853	765
7699	956.08	492.331		Organic compounds	Lipids and lipid-like molecules	Glycerolipids	Glycosylglycerols	Glycosylglycerols	Fatty acids	Glycerolipids	Glycosylmonoacylglycerols	683	552	1221	743	1349	1513	560	687	720	1373	856	941	1077	1002	1059	785
7647	953.48	424.282		Organic compounds	Lipids and lipid-like molecules	Glycerolipids	Glycosylglycerols	Glycosylglycerols	Fatty acids	Glycerolipids	Monoacylglycerols	1223	1365	1718	1458	1046	1479	633	866	591	1274	463	714	528	492	413	885
8211	982.63	590.491		Organic compounds	Lipids and lipid-like molecules	Fatty Acyls	Lineolic acids and derivatives	Lineolic acids and derivatives	Fatty acids	Glycerolipids	Diacylglycerols	1627	991	1279	1053	1544	940	800	1111	1094	975	862	1457	597	824	689	889
7144	913.7	328.261		Organic compounds	Lipids and lipid-like molecules	Glycerolipids	Monoradylglycerols	1-monoacylglycerols	Fatty acids	Glycerolipids	Monoacylglycerols	1242	233	1757	713	1966	1968	199	1039	729	1949	1372	1026	193	1068	1114	280
8588	999.88	420.344		Organic compounds	Lipids and lipid-like molecules	Glycerolipids	Diradylglycerols	Diradylglycerols	Fatty acids	Glycerolipids	Monoacylglycerols	1331	1026	1102	1005	1099	996	938	1260	1039	1212	1224	1130	1350	1227	1127	1042
6442	835.08	490.314		Organic compounds	Lipids and lipid-like molecules	Glycerolipids	Glycosylglycerols	Glycosylglycerols	Fatty acids	Glycerolipids	Glycosylmonoacylglycerols	824	809	1504	545	2223	1793	297	1054	887	1152	1452	1560	1285	1068	1568	726
6070	742.66	358.308		Organic compounds	Lipids and lipid-like molecules	Glycerolipids	Monoradylglycerols	1-monoacylglycerols	Fatty acids	Glycerolipids	Monoacylglycerols	161	1909	1594	2195	140	2108	2481	2054	125	2698	2442	153	111	196	146	287
7342	931.95	426.297		Organic compounds	Lipids and lipid-like molecules	Fatty Acyls	Lineolic acids and derivatives	Lineolic acids and derivatives	Fatty acids	Glycerolipids	Monoacylglycerols	1227	1198	1315	1035	1226	1105	1217	1166	1212	1196	1453	1440	1230	1435	0	1366
8969	1011.75	576.509		Organic compounds	Lipids and lipid-like molecules	Glycerolipids	Diradylglycerols	1,2-diacylglycerols	Fatty acids	Glycerolipids	Diacylglycerols	1623	1608	1184	1062	1032	1079	982	1167	1267	999	925	1231	1034	1222	1320	1275
9563	1030.1	582.431		Organic compounds	Lipids and lipid-like molecules	Glycerolipids	Diradylglycerols	Diacylglycerols	Fatty acids	Glycerolipids	Diacylglycerols	1443	1401	1503	1308	1450	1398	728	1449	1683	1259	892	1354	724	756	760	1714
8692	1004.03	590.491		Organic compounds	Lipids and lipid-like molecules	Fatty Acyls	Lineolic acids and derivatives	Lineolic acids and derivatives	Fatty acids	Glycerolipids	Triacylglycerols	1147	1236	1137	736	1881	1050	1680	1553	1101	1236	2012	1366	394	1197	964	1144
7075	907.98	770.496		Organic compounds	Lipids and lipid-like molecules	Fatty Acyls	Fatty acyl glycosides	Fatty acyl glycosides of mono- and disaccharides	Fatty acids	Glycerolipids	Glycosyldiacylglycerols	0	1523	77	1197	91	1439	1775	1751	1438	2333	118	941	1108	2068	2578	2026
9117	1014.44	590.491		Organic compounds	Lipids and lipid-like molecules	Fatty Acyls	Lineolic acids and derivatives	Lineolic acids and derivatives	Fatty acids	Glycerolipids	Diacylglycerols	1352	1396	1289	889	1675	1327	1941	1344	1434	1458	1896	1557	277	1469	1424	1831
6552	848.93	556.291		Organic compounds	Lipids and lipid-like molecules	Glycerolipids	Glycosylglycerols	Glycosylglycerols	Fatty acids	Glycerolipids	Glycosylmonoacylglycerols	962	1149	1406	1595	1636	1699	1455	1484	2053	1566	1549	1902	1724	1375	436	782
2433	1067.75	600.473		Organic compounds	Lipids and lipid-like molecules	Glycerolipids	Diradylglycerols	Diacylglycerols	Fatty acids	Glycerolipids	Diacylglycerols	884	2026	965	1294	1731	1762	1071	1317	2852	2847	870	1634	669	910	1621	2337
7300	929.93	588.475		Organic compounds	Lipids and lipid-like molecules	Fatty Acyls	Lineolic acids and derivatives	Lineolic acids and derivatives	Fatty acids	Glycerolipids	Diacylglycerols	1331	1645	1510	0	3138	0	2291	0	2528	2794	443	3559	0	2201	0	3594
11006	1079.59	333.3		Organic compounds	Lipids and lipid-like molecules	Fatty Acyls	Fatty acid esters	Fatty acid esters	Fatty acids	Glycerolipids	Monoacylglycerols	2943	2360	888	1270	1441	1044	909	1099	1141	843	2006	2415	1313	3145	932	1311
7619	950.5	590.491		Organic compounds	Lipids and lipid-like molecules	Fatty Acyls	Lineolic acids and derivatives	Lineolic acids and derivatives	Fatty acids	Glycerolipids	Diacylglycerols	1878	1261	921	1510	2225	1515	1428	1157	1648	1708	1644	1945	1063	1890	1320	2154
8190	981.65	562.46		Organic compounds	Lipids and lipid-like molecules	Glycerolipids	Diradylglycerols	1,2-diacylglycerols	Fatty acids	Glycerolipids	Diacylglycerols	4076	2202	1727	192	2321	155	2933	196	714	2234	140	1415	111	2665	273	4093
8632	1001.3	776.547		Organic compounds	Lipids and lipid-like molecules	Fatty Acyls	Lineolic acids and derivatives	Lineolic acids and derivatives	Fatty acids	Glycerolipids	Diacylglycerols	4911	0	0	0	1858	774	4741	0	1884	4332	0	2387	1170	3436	0	0
11099	834.84	676.368		Organic compounds	Lipids and lipid-like molecules	Glycerolipids	Glycosylglycerols	Glycosylglycerols	Fatty acids	Glycerolipids	Glycosylmonoacylglycerols	1233	1146	3421	1716	2772	2720	620	1751	1003	2344	1439	1376	1730	1406	1746	1477
7064	906.7	500.335		Organic compounds	Lipids and lipid-like molecules	Glycerolipids	Glycosylglycerols	Glycosylglycerols	Fatty acids	Glycerolipids	Glycosylmonoacylglycerols	1041	1061	2990	1189	4107	3110	314	1533	1709	2128	1783	2265	1413	1176	1509	973
6747	877.64	556.292		Organic compounds	Lipids and lipid-like molecules	Glycerolipids	Glycosylglycerols	Glycosylglycerols	Fatty acids	Glycerolipids	Glycosylmonoacylglycerols	105	1939	4087	4673	331	3114	1601	6062	518	3075	2173	523	146	330	262	533
6971	899	490.315		Organic compounds	Lipids and lipid-like molecules	Glycerolipids	Glycosylglycerols	Glycosylglycerols	Fatty acids	Glycerolipids	Glycosylmonoacylglycerols	1675	1208	2424	1289	3002	2261	504	1681	1409	1966	2190	2131	2232	1935	2572	1381
7643	953.62	426.298		Organic compounds	Lipids and lipid-like molecules	Glycerolipids	Glycosylglycerols	Glycosylglycerols	Fatty acids	Glycerolipids	Glycosylmonoacylglycerols	1069	1568	1967	1216	2968	3086	1279	4579	987	1470	1364	3533	1533	745	797	1713
9485	1028.65	598.495		Organic compounds	Lipids and lipid-like molecules	Glycerolipids	Diradylglycerols	Diacylglycerols	Fatty acids	Glycerolipids	Diacylglycerols	2623	2186	1452	1221	1328	1237	782	2229	2710	3397	1594	1495	2202	1316	1418	2778
10530	1065.15	590.491		Organic compounds	Lipids and lipid-like molecules	Fatty Acyls	Lineolic acids and derivatives	Lineolic acids and derivatives	Fatty acids	Glycerolipids	Diacylglycerols	3636	2921	506	4585	4995	1482	362	2423	411	359	3249	0	560	0	330	4722
10776	1073.12	596.478		Organic compounds	Lipids and lipid-like molecules	Fatty Acyls	Fatty acid esters	Fatty acid esters	Terpenoids	Glycerolipids	Carotenoids (C40, ÃŽÂ²-ÃŽÂ²)	574	1287	1821	1309	3074	1111	2201	2264	4017	1090	1087	2395	1173	1475	3910	3482
7698	956.46	370.309		Organic compounds	Lipids and lipid-like molecules	Fatty Acyls	Fatty alcohols	Fatty alcohols	Fatty acids	Glycerolipids	Monoacylglycerols	1165	982	1455	1096	3109	3655	1224	1369	1168	3465	4682	2629	2346	1672	1926	1938
6714	873.32	516.33		Organic compounds	Lipids and lipid-like molecules	Glycerolipids	Glycosylglycerols	Glycosylglycerols	Fatty acids	Glycerolipids	Glycosylmonoacylglycerols	1611	1393	3078	1511	3624	4599	964	1565	1605	3023	1458	1722	1766	1565	2480	2350
10390	1059.19	596.477		Organic compounds	Lipids and lipid-like molecules	Fatty Acyls	Fatty alcohols	Fatty alcohols	Terpenoids	Glycerolipids	Diacylglycerols	669	1280	1581	1617	5668	2038	1930	2110	3490	2040	1180	1567	1230	1243	4112	3393
9800	1039.55	522.341		Organic compounds	Organic oxygen compounds	Organooxygen compounds	Alcohols and polyols	Secondary alcohols	Fatty acids	Glycerolipids	Monoacylglycerols	2584	2437	2557	2572	2585	2552	1280	2462	2680	2400	1487	2330	1671	1713	1750	2172
9767	1037.88	610.461		Organic compounds	Lipids and lipid-like molecules	Fatty Acyls	Lineolic acids and derivatives	Lineolic acids and derivatives	Fatty acids	Glycerolipids	Diacylglycerols	1953	2068	2635	2022	1709	1876	3353	3037	1783	1907	3236	1279	1437	2958	3390	1701
6466	835.12	328.261		Organic compounds	Lipids and lipid-like molecules	Glycerolipids	Monoradylglycerols	1-monoacylglycerols	Fatty acids	Glycerolipids	Monoacylglycerols	1865	1202	3253	1111	3697	3180	466	2131	1753	2398	3262	2924	2337	2044	3215	1506
9166	1016.43	576.478		Organic compounds	Lipids and lipid-like molecules	Fatty Acyls	Lineolic acids and derivatives	Lineolic acids and derivatives	Fatty acids	Glycerolipids	Diacylglycerols	4475	2456	0	2362	2624	1011	1201	1013	3282	4192	4405	1387	2611	1080	2899	1807
9119	1014.49	596.48		Organic compounds	Lipids and lipid-like molecules	Glycerolipids	Diradylglycerols	Diacylglycerols	Fatty acids	Glycerolipids	Diacylglycerols	1408	2234	2937	1785	2001	1351	4850	2856	4072	1877	1990	1803	1382	2464	3995	0
7664	954.3	570.43		Organic compounds	Lipids and lipid-like molecules	Glycerolipids	Diradylglycerols	Diacylglycerols	Terpenoids	Glycerolipids	Diacylglycerols	2583	2976	2815	2382	4987	3630	0	1561	4579	3663	0	4694	0	0	0	4923
6972	899.2	328.261		Organic compounds	Lipids and lipid-like molecules	Glycerolipids	Monoradylglycerols	Monoacylglycerols	Fatty acids	Glycerolipids	Monoacylglycerols	2065	1512	3274	1335	3509	3120	762	2154	1837	2454	3265	2920	2794	2597	3227	2025
7710	955.73	500.372		Organic compounds	Lipids and lipid-like molecules	Fatty Acyls	Fatty acid esters	Fatty acid esters	Fatty acids	Glycerolipids	Monoacylglycerols	1653	3867	2287	2359	3065	2877	1490	4230	0	1981	2609	2948	2022	2224	3210	2651
10396	1059.44	539.367		Organic compounds	Organic oxygen compounds	Organooxygen compounds	Carbohydrates and carbohydrate conjugates	Glycosyl compounds	Fatty acids	Glycerolipids	Glycosylmonoacylglycerols	2588	2845	2708	2543	1643	2366	2526	2383	2524	2076	2512	2716	2386	2845	2870	2715
10883	1076.37	539.367		Organic compounds	Lipids and lipid-like molecules	NA	NA	Lipids and lipid-like molecules	Fatty acids	Glycerolipids	Monoacylglycerols	2627	2406	2423	2295	2570	2609	2630	2329	2449	2628	2376	2640	2375	2727	2815	2695
6725	875.12	816.507		Organic compounds	Lipids and lipid-like molecules	Glycerolipids	Triradylcglycerols	Triacylglycerols	Fatty acids	Glycerolipids	Triacylglycerols	1843	1292	3157	4475	4787	1997	2917	3641	3786	3458	1771	3310	3273	2695	537	1084
6269	815.95	468.273		Organic compounds	Lipids and lipid-like molecules	Glycerolipids	Glycosylglycerols	Glycosylglycerols	Fatty acids	Glycerolipids	Glycosylmonoacylglycerols	2588	2854	4147	3277	3148	3060	1956	2261	2044	2870	2897	3302	2813	2673	3271	1982
7271	924.95	570.465		Organic compounds	Lipids and lipid-like molecules	Glycerolipids	Diradylglycerols	1,2-diacylglycerols	Fatty acids	Glycerolipids	Diacylglycerols	4348	3947	2518	2064	5380	3058	0	2833	4170	3934	628	5205	3140	878	836	2730
7877	963.94	324.23		Organic compounds	Lipids and lipid-like molecules	Glycerolipids	Monoradylglycerols	1-monoacylglycerols	Fatty acids	Glycerolipids	Monoacylglycerols	534	3124	6673	8838	682	8136	376	9073	1194	4620	316	1025	360	355	277	791
7770	959.12	816.506		Organic compounds	Lipids and lipid-like molecules	Glycerolipids	Glycosylglycerols	Glycosyldiacylglycerols	Fatty acids	Glycerolipids	Glycosyldiacylglycerols	2330	1766	3050	4951	4660	2225	3075	3834	3757	3741	2363	3189	3086	2951	597	1105
2179	1010.48	782.566		Organic compounds	Lipids and lipid-like molecules	Fatty Acyls	Fatty acyl glycosides	Fatty acyl glycosides of mono- and disaccharides	Fatty acids	Glycerolipids	Triacylglycerols	3720	1745	2390	1346	1007	2536	5799	1844	2937	6192	2225	3650	3568	1373	4221	2541
10281	1057.35	610.465		Organic compounds	Organic oxygen compounds	Organooxygen compounds	Carbohydrates and carbohydrate conjugates	Hexoses	Fatty acids	Glycerolipids	Monoacylglycerols	2953	3310	3077	3246	4387	3234	2397	2765	3259	3901	2361	2889	2414	2351	2931	3058
6356	827	324.229		Organic compounds	Lipids and lipid-like molecules	NA	NA	Lipids and lipid-like molecules	Polyketides	Glycerolipids	Monoacylglycerols	3248	3934	4155	3591	3069	4578	2618	2685	2013	4175	3379	3403	2780	2436	2977	2598
7470	938.58	816.507		Organic compounds	Lipids and lipid-like molecules	Glycerolipids	Glycosylglycerols	Sulfoquinovosyldiacylglycerols	Fatty acids	Glycerolipids	Glycosyldiacylglycerols	2618	1709	3831	5600	5481	2203	3520	4733	4449	4725	2332	3579	3322	2686	525	1134
10223	1055.44	671.519		Organic compounds	Organic acids and derivatives	Carboxylic acids and derivatives	Dicarboxylic acids and derivatives	Dicarboxylic acids and derivatives	Fatty acids	Glycerolipids	Open-chain polyketides	3891	3313	3416	3317	3692	3053	3383	2984	3559	3136	3404	3714	2947	3222	3332	3125
11087	889.84	514.315		Organic compounds	Lipids and lipid-like molecules	Glycerolipids	Glycosylglycerols	Glycosylglycerols	Fatty acids	Glycerolipids	Glycosylmonoacylglycerols	3337	3614	5396	3590	4657	4434	2060	2981	1642	4233	3596	2803	4108	3474	2758	2725
7498	941.98	572.48		Organic compounds	Lipids and lipid-like molecules	Glycerolipids	Diradylglycerols	1,2-diacylglycerols	Fatty acids	Glycerolipids	Diacylglycerols	7085	0	0	0	3434	0	4908	3855	4839	6718	0	3728	4578	6003	5227	5744
10675	1067.97	465.368		Organic compounds	Organic nitrogen compounds	Organonitrogen compounds	Amines	1,2-aminoalcohols	Fatty acids	Glycerolipids	Monoacylglycerols	4775	4863	3990	2729	2960	4105	3067	2870	3901	4257	3678	2881	2741	3051	2924	3754
8202	983.33	586.372		Organic compounds	Organic oxygen compounds	Organooxygen compounds	Carbohydrates and carbohydrate conjugates	O-glycosyl compounds	Fatty acids	Glycerolipids	Glycosyldiacylglycerols	3369	3999	3457	3624	3305	3661	3282	3501	4072	3646	3233	3113	3453	3625	3893	3814
6481	838.65	556.292		Organic compounds	Lipids and lipid-like molecules	Glycerolipids	Glycosylglycerols	Glycosylglycerols	Fatty acids	Glycerolipids	Glycosylmonoacylglycerols	995	4535	7496	7839	1701	6008	1275	10378	2284	6693	1466	1918	1462	1433	459	1121
9352	1025.43	458.274		Organic compounds	Lipids and lipid-like molecules	Fatty Acyls	Fatty acyl glycosides	Alkyl glycosides	Fatty acids	Glycerolipids	Fatty acyl glycosides of mono- and disaccharides	4222	4131	4219	4763	4202	4280	2420	4379	4755	4289	2559	4420	2160	2078	2360	4535
7054	907.2	356.291		Organic compounds	Lipids and lipid-like molecules	Glycerolipids	Monoradylglycerols	Monoacylglycerols	Fatty acids	Glycerolipids	Monoacylglycerols	2254	2022	6537	2920	8952	6713	924	3230	2934	4855	4197	4563	2828	2553	3145	2387
11085	878.16	514.315		Organic compounds	Lipids and lipid-like molecules	Glycerolipids	Glycosylglycerols	Glycosylglycerols	Fatty acids	Glycerolipids	Glycosylmonoacylglycerols	2693	2595	6417	3325	5035	5263	1413	2730	2506	3893	4057	3809	5121	4975	5021	3104
9171	1018.93	592.507		Organic compounds	Lipids and lipid-like molecules	Fatty Acyls	Lineolic acids and derivatives	Lineolic acids and derivatives	Fatty acids	Glycerolipids	Diacylglycerols	6978	4804	1252	4339	9049	6639	978	5532	2324	1028	4714	3536	2096	2124	3167	4604
2230	1025.42	464.21		Organic compounds	Organic oxygen compounds	Organooxygen compounds	Ethers	Polyethylene glycols	Fatty acids	Glycerolipids	Monoacylglycerols	4060	4082	3967	4113	4322	4380	3655	3884	4159	3769	3990	3786	3787	3781	3786	3988
10970	1078.57	736.489		Organic compounds	Lipids and lipid-like molecules	Glycerolipids	Glycosylglycerols	Glycosyldiacylglycerols	Fatty acids	Glycerolipids	Glycosyldiacylglycerols	3490	1212	920	973	7319	1186	1588	660	7528	809	1039	6052	182	4989	12013	13554
11081	859.22	678.384		Organic compounds	Lipids and lipid-like molecules	Glycerolipids	Glycosylglycerols	Glycosylglycerols	Fatty acids	Glycerolipids	Glycosylmonoacylglycerols	2381	2241	6418	3071	9143	6748	1209	3425	3408	4841	3769	4210	3529	3073	5990	3324
7987	971.52	500.336		Organic compounds	Lipids and lipid-like molecules	Glycerolipids	Glycosylglycerols	Glycosylglycerols	Fatty acids	Glycerolipids	Glycosylmonoacylglycerols	2688	2650	9080	3456	9065	6517	916	4167	3315	4551	3719	3700	3569	3071	3639	3081
2343	1049.54	407.328		Organic compounds	Organic nitrogen compounds	Organonitrogen compounds	Amines	Trialkylamines	Fatty acids	Glycerolipids	Monoacylglycerols	4436	5083	4603	3810	3957	3631	5866	4506	4229	3957	5759	3310	5624	6179	2138	3751
7479	940.15	400.281		Organic compounds	Organic oxygen compounds	Organooxygen compounds	Carbohydrates and carbohydrate conjugates	Hexoses	Terpenoids	Glycerolipids	Acetogenins	2121	3482	5073	4687	8416	7056	4809	7685	2163	2974	2641	9283	3484	2143	2305	3710
9294	1020.92	332.292		Organic compounds	Lipids and lipid-like molecules	Fatty Acyls	Fatty alcohols	Fatty alcohols	Fatty acids	Glycerolipids	Monoacylglycerols	4508	4317	4358	3933	4561	4385	4699	4383	4500	5101	4410	4954	4520	4610	4663	4207
8356	991.34	582.433		Organic compounds	Lipids and lipid-like molecules	Glycerolipids	Diradylglycerols	Diacylglycerols	Fatty acids	Glycerolipids	Diacylglycerols	3725	5524	3153	5024	4161	4995	4578	4898	5727	5352	2877	4629	4623	4882	4846	5819
5409	322.67	546.326		Organic compounds	Organic oxygen compounds	Organooxygen compounds	Carbohydrates and carbohydrate conjugates	Glycosyl compounds	Fatty acids	Glycerolipids	Monoacylglycerols	5976	5032	5572	5565	5323	5107	5608	5974	5170	5002	6081	5461	5846	6052	5842	5401
9456	1028.62	572.481		Organic compounds	Lipids and lipid-like molecules	Fatty Acyls	Lineolic acids and derivatives	Lineolic acids and derivatives	Fatty acids	Glycerolipids	Diacylglycerols	10767	11891	7547	5999	3417	5746	3862	7631	6088	11904	0	2681	5345	5287	0	7654
9923	1046.71	406.329		Organic compounds	Lipids and lipid-like molecules	Fatty Acyls	NA	Fatty Acyls	Fatty acids	Glycerolipids	Monoacylglycerols	6866	6910	6898	7301	6694	7212	4229	7246	6752	6973	4527	6169	4172	4302	4377	6767
9640	1033.81	336.265		Organic compounds	Lipids and lipid-like molecules	Fatty Acyls	Lineolic acids and derivatives	Lineolic acids and derivatives	Fatty acids	Glycerolipids	Monoacylglycerols	7722	4710	1826	5470	10110	6500	1768	6678	2849	2008	12327	5513	10082	10985	6245	3383
8522	995.94	494.382		Organic compounds	Organic oxygen compounds	Organooxygen compounds	Ethers	Dialkyl ethers	Fatty acids	Glycerolipids	Triacylglycerols	5283	6438	4317	7059	5082	5944	6547	6041	6992	7294	5320	5440	6487	6418	7061	7266
9217	1019.4	574.496		Organic compounds	Lipids and lipid-like molecules	Fatty Acyls	Lineolic acids and derivatives	Lineolic acids and derivatives	Fatty acids	Glycerolipids	Diacylglycerols	9617	9628	5598	6881	11624	10877	5206	8164	5781	5025	0	5899	0	8683	5017	7881
9637	1033.86	592.506		Organic compounds	Lipids and lipid-like molecules	Fatty Acyls	Lineolic acids and derivatives	Lineolic acids and derivatives	Fatty acids	Glycerolipids	Diacylglycerols	6657	5673	3361	5993	10658	7031	3585	5519	5512	2700	11407	6324	11406	11341	5696	4749
8558	997.58	450.355		Organic compounds	Organic oxygen compounds	Organooxygen compounds	Ethers	Polyethylene glycols	Fatty acids	Glycerolipids	Monoacylglycerols	5910	7178	6193	7500	6012	6933	6720	6991	8067	7602	6083	7144	6739	7310	7617	8170
7134	913.39	586.46		Organic compounds	Lipids and lipid-like molecules	Fatty Acyls	Lineolic acids and derivatives	Lineolic acids and derivatives	Fatty acids	Glycerolipids	Diacylglycerols	214	8954	158	7138	306	5737	9609	10096	8880	15026	331	4606	5989	12407	12160	10720
8602	998.99	406.329		Organic compounds	Organic oxygen compounds	Organooxygen compounds	Ethers	Polyethylene glycols	Fatty acids	Glycerolipids	Monoacylglycerols	7469	6694	7435	6885	6924	6932	6574	6931	6691	7048	7368	7735	6908	7133	6808	6975
10376	1060.41	522.413		Organic compounds	Organic oxygen compounds	Organooxygen compounds	Carbohydrates and carbohydrate conjugates	Hexoses	Fatty acids	Glycerolipids	Fatty acyl glycosides of mono- and disaccharides	6462	6614	6228	6499	8581	10636	6120	6355	6504	10425	6851	6767	6669	5763	6632	6990
10726	1071.4	522.413		Organic compounds	Organic oxygen compounds	Organooxygen compounds	Ethers	Dialkyl ethers	Fatty acids	Glycerolipids	Monoacylglycerols	6913	7182	7447	7726	7026	7386	7086	6425	7802	7700	7222	6797	6801	6439	7669	7691
10608	1065.81	572.48		Organic compounds	Lipids and lipid-like molecules	Fatty Acyls	Lineolic acids and derivatives	Lineolic acids and derivatives	Fatty acids	Glycerolipids	Diacylglycerols	9999	9349	6623	8195	7434	9773	4635	7409	5597	16657	0	3070	6899	6840	5063	8308
6718	872.62	354.278		Organic compounds	Lipids and lipid-like molecules	Fatty Acyls	Lineolic acids and derivatives	Lineolic acids and derivatives	Fatty acids	Glycerolipids	Monoacylglycerols	6622	5117	10123	5617	11247	13540	3764	5943	5230	11176	5096	6345	7084	6359	8449	8316
6888	889.75	531.341		Organic compounds	Organic acids and derivatives	Carboxylic acids and derivatives	Amino acids, peptides, and analogues	Alpha amino acids and derivatives	Fatty acids	Glycerolipids	N-acyl amines	6837	6861	12581	7529	9510	10150	5207	6553	4151	9382	7523	6740	8288	7274	7224	8134
10086	1051.11	536.143		Organic compounds	Organic oxygen compounds	Organooxygen compounds	Carbohydrates and carbohydrate conjugates	Disaccharides	Carbohydrates	Glycerolipids	Disaccharides	7138	8989	8603	8342	7262	6570	8856	9123	6427	7069	9597	10254	8438	7874	8670	8481
9459	1028.38	774.529		Organic compounds	Lipids and lipid-like molecules	Glycerolipids	Glycosylglycerols	Glycosyldiacylglycerols	Fatty acids	Glycerolipids	Glycosyldiacylglycerols	11402	11776	10568	10518	10396	10707	3902	11308	11315	11049	3369	11486	178	2639	2186	11556
5334	303.53	502.299		Organic compounds	Organic oxygen compounds	Organooxygen compounds	Ethers	Polyethylene glycols	Fatty acids	Glycerolipids	Monoacylglycerols	8728	8652	8725	8691	7762	7617	8795	7867	7823	8009	9097	8928	8875	9609	8609	9309
6760	877.32	330.277		Organic compounds	Lipids and lipid-like molecules	Glycerolipids	Monoradylglycerols	1-monoacylglycerols	Fatty acids	Glycerolipids	Monoacylglycerols	819	8737	23278	24915	1054	14133	7469	30816	1817	14353	8489	1109	301	639	930	1970
6779	878.15	531.341		Organic compounds	Organic acids and derivatives	Carboxylic acids and derivatives	Amino acids, peptides, and analogues	Alpha amino acids and derivatives	Fatty acids	Glycerolipids	N-acyl amines	6566	6428	13972	8854	15357	12502	3664	8698	6378	10167	10919	9324	11633	10863	10984	7151
5244	286.88	458.273		Organic compounds	Organic oxygen compounds	Organooxygen compounds	Ethers	Polyethylene glycols	Fatty acids	Glycerolipids	Monoacylglycerols	9167	10464	8965	8860	9399	10378	9688	9182	9997	8628	10012	9804	9918	10247	9858	10527
11075	821.97	676.368		Organic compounds	Lipids and lipid-like molecules	Glycerolipids	Glycosylglycerols	Glycosylglycerols	Fatty acids	Glycerolipids	Glycosylmonoacylglycerols	5267	5499	17345	8362	18820	13016	1875	8969	6245	7994	10609	11161	12109	9222	13041	5969
9895	1044.69	334.25		Organic compounds	Lipids and lipid-like molecules	Fatty Acyls	Lineolic acids and derivatives	Lineolic acids and derivatives	Fatty acids	Glycerolipids	Monoacylglycerols	13465	14090	12061	13704	12646	12865	1532	12441	14301	13668	1423	14567	0	2218	2011	15262
6607	859.24	516.33		Organic compounds	Lipids and lipid-like molecules	Glycerolipids	Glycosylglycerols	Glycosylglycerols	Fatty acids	Glycerolipids	Glycosylmonoacylglycerols	6260	4942	16284	8191	20865	15296	2745	7419	7944	11721	9571	10984	9223	7710	14530	8993
8742	1007.06	494.383		Organic compounds	Organic oxygen compounds	Organooxygen compounds	Ethers	Polyethylene glycols	Fatty acids	Glycerolipids	Triacylglycerols	9953	9855	10514	10619	8681	11337	8868	9324	11162	12882	9569	9737	10006	9912	9231	12225
10744	1073.02	478.387		Organic compounds	Lipids and lipid-like molecules	Fatty Acyls	NA	Fatty Acyls	Fatty acids	Glycerolipids	Monoacylglycerols	10275	10286	9966	9769	10025	11108	9767	10792	10646	10453	10664	10004	10458	9659	10888	10352
10528	1063.96	434.36		Organic compounds	Organic oxygen compounds	Organooxygen compounds	Ethers	Dialkyl ethers	Fatty acids	Glycerolipids	Monoacylglycerols	10520	10096	9938	10074	9908	10411	9954	10126	10662	10499	10860	10677	9873	10405	10722	10740
9231	1019.34	354.276		Organic compounds	Lipids and lipid-like molecules	Glycerolipids	Monoradylglycerols	1-monoacylglycerols	Fatty acids	Glycerolipids	Monoacylglycerols	16592	13788	7521	11743	19643	17816	6231	13166	6031	11482	11974	8291	7117	0	6215	12145
7032	905.42	330.277		Organic compounds	Lipids and lipid-like molecules	Glycerolipids	Monoradylglycerols	1-monoacylglycerols	Fatty acids	Glycerolipids	Monoacylglycerols	6148	9858	12300	16894	12790	16385	4604	10193	6002	15587	10317	12120	11773	13002	8829	10425
6437	834.82	676.368		Organic compounds	Lipids and lipid-like molecules	Glycerolipids	Glycosylglycerols	Glycosyldiacylglycerols	Fatty acids	Glycerolipids	Glycosyldiacylglycerols	7835	8118	18868	9983	16599	18152	3573	9617	6564	13165	10132	9741	11515	10047	11547	11987
9467	1028.19	756.521		Organic compounds	Lipids and lipid-like molecules	Fatty Acyls	Lineolic acids and derivatives	Lineolic acids and derivatives	Polyketides	Glycerolipids	Open-chain polyketides	15975	16052	13585	14519	14878	13848	0	14182	16910	15816	4387	15556	0	3667	3847	15730
10809	1074.54	434.361		Organic compounds	Lipids and lipid-like molecules	NA	NA	Lipids and lipid-like molecules	Fatty acids	Glycerolipids	Monoacylglycerols	12813	13379	12078	12826	13005	13120	11865	12961	13051	12959	13629	12795	12287	12428	13541	13106
6603	859.23	678.384		Organic compounds	Lipids and lipid-like molecules	Glycerolipids	Glycosylglycerols	Glycosylglycerols	Fatty acids	Glycerolipids	Glycosylmonoacylglycerols	7878	6396	21948	9900	29559	22661	3078	9998	8841	15406	11689	14876	10541	9621	20656	11030
11084	878.14	536.297		Organic compounds	Lipids and lipid-like molecules	Glycerolipids	Glycosylglycerols	Glycosylglycerols	Fatty acids	Glycerolipids	Glycosyldiacylglycerols	12023	9782	17815	10693	19251	16379	6078	9803	9325	13122	15919	14104	17485	16377	17737	12118
8819	1008.53	354.276		Organic compounds	Lipids and lipid-like molecules	Fatty Acyls	Lineolic acids and derivatives	Lineolic acids and derivatives	Fatty acids	Glycerolipids	Monoacylglycerols	23323	15204	15784	9230	17828	16573	11756	11993	12630	13998	11294	13735	10173	10196	8222	18088
8662	1002.87	586.46		Organic compounds	Lipids and lipid-like molecules	Fatty Acyls	Lineolic acids and derivatives	Lineolic acids and derivatives	Fatty acids	Glycerolipids	Diacylglycerols	19246	16302	22038	20743	18907	23883	1616	22721	16668	16067	1297	26708	1208	1642	1784	19162
4780	246.69	326.194		Organic compounds	Organic oxygen compounds	Organooxygen compounds	Ethers	Polyethylene glycols	Fatty acids	Glycerolipids	Monoacylglycerols	14183	14255	13344	14055	13992	14869	12837	14311	14608	14985	14091	16258	13110	15231	15239	15309
10807	1075.24	390.334		Organic compounds	Lipids and lipid-like molecules	Fatty Acyls	Fatty alcohol esters	Fatty alcohol esters	Fatty acids	Glycerolipids	Monoacylglycerols	15405	14425	14723	14293	14310	16027	14539	14358	14090	14798	14491	15396	14194	15132	16533	15109
9054	1012.87	274.25		Organic compounds	Organic oxygen compounds	Organooxygen compounds	Ethers	Dialkyl ethers	Fatty acids	Glycerolipids	Monoacylglycerols	14587	14200	15141	13971	12630	13509	15869	15069	15026	15170	14996	16021	15583	15312	15727	15833
9431	1028.82	420.345		Organic compounds	Lipids and lipid-like molecules	NA	NA	Lipids and lipid-like molecules	Fatty acids	Glycerolipids	Monoacylglycerols	16643	15848	16886	16442	15806	16269	17531	17079	17041	15842	17319	17143	17290	17827	18232	15904
7213	920.55	354.276		Organic compounds	Lipids and lipid-like molecules	Fatty Acyls	Lineolic acids and derivatives	Lineolic acids and derivatives	Fatty acids	Glycerolipids	Monoacylglycerols	12546	11415	24858	13238	29795	25053	7067	11742	13813	20169	16267	15972	17341	15309	22527	17399
6602	859.22	498.32		Organic compounds	Lipids and lipid-like molecules	Glycerolipids	Glycosylglycerols	Glycosylglycerols	Fatty acids	Glycerolipids	Glycosylmonoacylglycerols	11457	9903	29493	14040	37975	30934	5052	13575	15765	19696	17374	19875	17266	13491	25755	14146
8854	1008.93	450.355		Organic compounds	Organic oxygen compounds	Organooxygen compounds	Ethers	Polyethylene glycols	Fatty acids	Glycerolipids	Monoacylglycerols	17967	16712	20009	17258	18787	20398	14987	17672	18478	21275	18312	18369	18787	18902	17675	20716
9405	1027.82	464.371		Organic compounds	Organic oxygen compounds	Organooxygen compounds	Ethers	Polyethylene glycols	Fatty acids	Glycerolipids	Monoacylglycerols	19739	19914	20566	20214	21132	19745	15762	20653	20537	21045	16646	21893	15090	15494	15797	22129
6325	821.97	514.315		Organic compounds	Lipids and lipid-like molecules	Glycerolipids	Glycosylglycerols	Glycosylglycerols	Fatty acids	Glycerolipids	Glycosylmonoacylglycerols	13035	12084	32485	18026	35967	26680	4391	18510	14964	18110	23191	22820	23484	19663	25032	14235
8430	991.97	774.53		Organic compounds	Lipids and lipid-like molecules	Fatty Acyls	Lineolic acids and derivatives	Lineolic acids and derivatives	Polyketides	Glycerolipids	Open-chain polyketides	0	32609	0	29749	1932	25030	24379	23752	33760	31821	0	12709	22510	26488	32926	31689
7214	920.64	516.33		Organic compounds	Lipids and lipid-like molecules	Glycerolipids	Glycosylglycerols	Glycosylglycerols	Fatty acids	Glycerolipids	Glycosylmonoacylglycerols	15197	13458	33515	15757	39080	35348	7837	14294	16388	27967	18548	18706	21495	17811	27946	20515
9495	1031.61	552.424		Organic compounds	Organic oxygen compounds	Organooxygen compounds	Ethers	Polyethylene glycols	Fatty acids	Glycerolipids	Monoacylglycerols	27577	27095	26916	26321	26522	28119	14002	26505	28648	28471	15858	28422	11866	14176	13395	30418
9632	1033.36	508.398		Organic compounds	Organic oxygen compounds	Organooxygen compounds	Ethers	Polyethylene glycols	Fatty acids	Glycerolipids	Triacylglycerols	26505	23668	25392	25837	28122	28606	16948	27496	27226	29127	18125	29036	16623	17462	17715	30501
6436	834.84	352.261		Organic compounds	Lipids and lipid-like molecules	Fatty Acyls	Lineolic acids and derivatives	Lineolic acids and derivatives	Fatty acids	Glycerolipids	Monoacylglycerols	18492	18836	42363	22832	36776	37889	9053	21639	13646	28426	21510	21030	28550	22304	24787	25601
9712	1037.11	376.319		Organic compounds	Lipids and lipid-like molecules	Fatty Acyls	Fatty alcohols	Fatty alcohols	Fatty acids	Glycerolipids	Monoacylglycerols	25003	24686	24645	23512	23296	25215	26703	23581	24846	26434	24573	25788	25868	26970	29281	24708
9682	1034.94	464.371		Organic compounds	Organic oxygen compounds	Organooxygen compounds	Ethers	Polyethylene glycols	Fatty acids	Glycerolipids	Monoacylglycerols	25075	23702	25652	25246	27369	26884	22648	26300	27610	27888	24414	28393	22868	22701	23708	28373
9711	1036.31	420.345		Organic compounds	Organic oxygen compounds	Organooxygen compounds	Ethers	Dialkyl ethers	Fatty acids	Glycerolipids	Monoacylglycerols	26428	26897	25703	27096	28347	25940	27245	27215	27233	28238	27565	28439	27261	27343	26783	28358
8925	1010.21	406.329		Organic compounds	Lipids and lipid-like molecules	NA	NA	Lipids and lipid-like molecules	Fatty acids	Glycerolipids	Monoacylglycerols	27632	23962	29539	26265	28392	26068	24678	26898	29276	30636	28155	31717	28410	29331	28472	32417
6987	900.57	522.341		Organic compounds	Organic oxygen compounds	Organooxygen compounds	Ethers	Polyethylene glycols	Fatty acids	Glycerolipids	Triacylglycerols	30317	32268	26182	28429	28547	27666	27458	28112	27225	27905	28061	37994	30141	31047	29101	34270
6876	889.88	352.261		Organic compounds	Lipids and lipid-like molecules	Fatty Acyls	Lineolic acids and derivatives	Lineolic acids and derivatives	Fatty acids	Glycerolipids	Monoacylglycerols	29378	29111	51113	30462	43849	47571	20018	28095	16193	37730	30209	27792	37433	33307	30317	32214
6763	878.16	514.315		Organic compounds	Lipids and lipid-like molecules	Glycerolipids	Glycosylglycerols	Glycosylglycerols	Fatty acids	Glycerolipids	Glycosylmonoacylglycerols	20987	21475	53905	27182	53031	43573	11712	26884	19882	32339	34463	32773	44395	38066	43619	23718
6320	821.99	676.368		Organic compounds	Lipids and lipid-like molecules	Glycerolipids	Glycosylglycerols	Glycosylglycerols	Fatty acids	Glycerolipids	Glycosylmonoacylglycerols	18298	18207	64997	29428	73504	49193	5589	31281	22413	30739	41530	42191	42493	34379	47443	18969
6762	878.17	352.261		Organic compounds	Lipids and lipid-like molecules	Fatty Acyls	Lineolic acids and derivatives	Lineolic acids and derivatives	Fatty acids	Glycerolipids	Monoacylglycerols	23801	24587	58426	32069	55773	49551	14266	30147	23958	37855	41289	37732	47686	45577	45263	29974
6319	821.98	496.304		Organic compounds	Lipids and lipid-like molecules	Glycerolipids	Glycosylglycerols	Glycosylglycerols	Fatty acids	Glycerolipids	Glycosylmonoacylglycerols	23979	24515	66251	35656	72154	51639	8698	37875	27870	37217	44851	46983	47284	40534	51564	28976
9504	1028.86	238.141		Organic compounds	Organic oxygen compounds	Organooxygen compounds	Ethers	Polyethylene glycols	Fatty acids	Glycerolipids	Monoacylglycerols	43749	43158	47312	46320	47374	45445	37465	47811	47012	45388	41141	50875	36059	38742	38076	47964
8889	1011.31	362.303		Organic compounds	Lipids and lipid-like molecules	Fatty Acyls	NA	Fatty Acyls	Fatty acids	Glycerolipids	Monoacylglycerols	43872	40830	45704	42069	43475	41253	40270	42085	45870	46127	47403	49226	46107	46667	48341	50497
7917	967.83	352.261		Organic compounds	Lipids and lipid-like molecules	Fatty Acyls	Lineolic acids and derivatives	Lineolic acids and derivatives	Fatty acids	Glycerolipids	Monoacylglycerols	73007	57321	81227	31456	39689	40757	40352	46512	49442	39609	45894	59480	54394	44857	40729	71117
6318	821.88	352.261		Organic compounds	Lipids and lipid-like molecules	Fatty Acyls	Lineolic acids and derivatives	Lineolic acids and derivatives	Fatty acids	Glycerolipids	Monoacylglycerols	34904	36032	85473	49865	90820	70164	14515	51004	40945	51199	64193	63445	64921	55683	67149	40560
10382	1060.64	330.277		Organic compounds	Lipids and lipid-like molecules	Glycerolipids	Monoradylglycerols	Monoradylglycerols	Fatty acids	Glycerolipids	Monoacylglycerols	10804	10683	9796	10564	296825	278851	9672	10324	7543	285520	10349	11704	10259	9185	8551	9221
9460	1028.75	612.476		Organic compounds	Lipids and lipid-like molecules	Fatty Acyls	Lineolic acids and derivatives	Lineolic acids and derivatives	Fatty acids	Glycerolipids	Diacylglycerols	317174	319450	319840	306142	312691	312270	130920	312555	330900	326207	114399	325529	3296	93748	94982	321141
9884	1044.33	584.444		Organic compounds	Lipids and lipid-like molecules	Fatty Acyls	Lineolic acids and derivatives	Lineolic acids and derivatives	Fatty acids	Glycerolipids	Diacylglycerols	539569	540039	545350	516715	557145	541989	26129	465200	556678	551927	20446	600559	3238	43141	36872	580035
9005	1010.56	749.501		Organic compounds	Lipids and lipid-like molecules	Glycerophospholipids	Glycerophosphoethanolamines	Monomethylphosphatidylethanolamines	Fatty acids	Glycerophospholipids	Glycerophosphoethanolamines	476	537	550	600	1033	348	200	0	956	189	0	934	163	350	720	1228
8789	1007.59	408.266		Organic compounds	Lipids and lipid-like molecules	Glycerophospholipids	NA	Glycerophospholipids	Fatty acids	Glycerophospholipids	Glycerophosphates	578	540	615	443	548	487	646	560	587	491	622	644	643	645	584	652
9057	1012.01	694.457		Organic compounds	Lipids and lipid-like molecules	Glycerophospholipids	NA	Glycerophospholipids	Fatty acids	Glycerophospholipids	Glycerophosphates	546	632	686	564	387	785	574	725	419	495	615	1252	878	645	605	487
7607	949.13	596.299		Organic compounds	Lipids and lipid-like molecules	Glycerophospholipids	Glycerophosphoinositols	1-acyl-sn-glycerol-3-phosphoinositols	Fatty acids	Glycerophospholipids	Glycerophosphoinositols	1053	1007	1179	776	542	843	1176	544	415	890	672	612	698	560	795	727
9571	1030.68	739.512		Organic compounds	Lipids and lipid-like molecules	Glycerophospholipids	Glycerophosphoethanolamines	Phosphatidylethanolamines	Fatty acids	Glycerophospholipids	Glycerophosphoethanolamines	1079	1460	715	692	930	1271	575	1098	1158	904	409	687	805	759	1084	1328
8980	1010.87	692.443		Organic compounds	Lipids and lipid-like molecules	Glycerophospholipids	Glycerophosphates	1,2-diacylglycerol-3-phosphates	Fatty acids	Glycerophospholipids	Glycerophosphates	881	860	557	1017	1126	958	1018	807	904	1768	605	1816	752	492	1255	539
8374	990.68	739.514		Organic compounds	Lipids and lipid-like molecules	Glycerophospholipids	Glycerophosphoethanolamines	Phosphatidylethanolamines	Fatty acids	Glycerophospholipids	Glycerophosphoethanolamines	694	1354	293	1099	392	1172	943	1339	1291	1242	362	700	1126	1259	1375	1353
8474	992.24	757.562		Organic compounds	Lipids and lipid-like molecules	Glycerophospholipids	Glycerophosphocholines	Phosphatidylcholines	Fatty acids	Glycerophospholipids	Glycerophosphocholines	3822	0	6663	0	2175	0	0	0	0	0	6377	0	0	0	0	0
1940	955.19	509.349		Organic compounds	Lipids and lipid-like molecules	Glycerophospholipids	NA	Glycerophospholipids	Fatty acids	Glycerophospholipids	Glycerophosphocholines	950	957	1125	1408	1288	1730	1346	922	664	1358	1668	1626	793	808	1041	1511
8376	990.74	783.576		Organic compounds	Lipids and lipid-like molecules	Glycerophospholipids	Glycerophosphocholines	Phosphatidylcholines	Fatty acids	Glycerophospholipids	Glycerophosphocholines	1331	813	1143	1877	886	685	1916	594	1149	2019	1923	845	1131	826	1507	1598
6145	773.09	572.297		Organic compounds	Lipids and lipid-like molecules	Glycerophospholipids	Glycerophosphoinositols	1-acyl-sn-glycerol-3-phosphoinositols	Fatty acids	Glycerophospholipids	Glycerophosphoinositols	386	1460	2562	3110	328	1225	1618	2958	321	1458	1674	348	0	1934	781	402
10755	1072.18	739.514		Organic compounds	Lipids and lipid-like molecules	Glycerophospholipids	Glycerophosphoethanolamines	Phosphatidylethanolamines	Fatty acids	Glycerophospholipids	Glycerophosphoethanolamines	1747	2842	999	460	639	1093	1467	1654	1573	2370	499	0	529	2485	1048	1498
10736	1072.94	706.458		Organic compounds	Lipids and lipid-like molecules	Glycerophospholipids	NA	Glycerophospholipids	Fatty acids	Glycerophospholipids	Glycerophosphates	0	2557	1446	668	833	1572	0	384	2276	315	2343	1081	1240	2697	2599	1787
7983	971.17	492.33		Organic compounds	Organic acids and derivatives	Carboxylic acids and derivatives	Amino acids, peptides, and analogues	Amino acids and derivatives	Fatty acids	Glycerophospholipids	N-acyl amines	1404	900	2040	1139	2135	2358	632	998	820	2249	1060	1130	1415	1319	1453	1729
8881	1011.38	713.5		Organic compounds	Lipids and lipid-like molecules	Glycerophospholipids	Glycerophosphoethanolamines	Phosphatidylethanolamines	Fatty acids	Glycerophospholipids	Glycerophosphoethanolamines	1571	1010	0	682	991	3027	662	1808	1762	490	0	1599	3569	2005	3205	1114
8904	1010.83	742.48		Organic compounds	Lipids and lipid-like molecules	Glycerophospholipids	NA	Glycerophospholipids	Fatty acids	Glycerophospholipids	Glycerophosphoglycerols	1839	1916	1544	1810	2144	1927	2195	2233	1594	2031	520	2105	1408	1017	1076	1556
6099	758.1	508.281		Organic compounds	Lipids and lipid-like molecules	Glycerophospholipids	Glycerophosphoglycerols	Lysophosphatidylglycerols	Fatty acids	Glycerophospholipids	Glycerophosphoglycerols	1395	5210	2386	3631	1027	2273	362	2627	1110	2047	477	2583	0	526	180	1179
8880	1009.41	783.576		Organic compounds	Lipids and lipid-like molecules	Glycerophospholipids	Glycerophosphocholines	Phosphatidylcholines	Fatty acids	Glycerophospholipids	Glycerophosphocholines	1888	1525	1953	3445	1511	1527	3617	961	1569	3535	2486	1590	2756	1380	2264	2826
7095	912.56	479.302		Organic compounds	Organic acids and derivatives	Carboxylic acids and derivatives	Amino acids, peptides, and analogues	Amino acids and derivatives	Fatty acids	Glycerophospholipids	Glycerophosphoethanolamines	2299	3560	6265	1840	1358	1816	2069	2068	1626	1778	2789	3170	1969	1712	1662	2547
6638	862.96	594.281		Organic compounds	Lipids and lipid-like molecules	Glycerophospholipids	Glycerophosphoinositols	1-acyl-sn-glycerol-3-phosphoinositols	Fatty acids	Glycerophospholipids	Glycerophosphoinositols	2485	3030	5193	2632	1768	2151	2596	2096	1270	1780	3135	2564	2422	2007	2591	2553
2073	990.74	481.317		Organic compounds	Organic acids and derivatives	Carboxylic acids and derivatives	Amino acids, peptides, and analogues	Amino acids and derivatives	Fatty acids	Glycerophospholipids	Glycerophosphoethanolamines	3854	2704	4866	3329	3786	2570	3321	2314	1001	1825	5274	5288	1609	1280	1173	2272
9959	1045.48	708.472		Organic compounds	Lipids and lipid-like molecules	Glycerophospholipids	Glycerophosphates	Glycerophosphates	Fatty acids	Glycerophospholipids	Glycerophosphates	845	2299	3218	2386	4296	1856	2028	3393	8022	1851	1178	2635	1080	1082	4049	6283
7807	961.61	477.286		Organic compounds	Lipids and lipid-like molecules	Glycerophospholipids	Glycerophosphoethanolamines	Glycero-3-phospho-N-acyl-ethanolamines	Fatty acids	Glycerophospholipids	Glycerophosphoethanolamines	2943	3467	3587	4062	2935	3609	4736	2056	1655	3710	2787	4034	2443	2239	2820	3158
9457	1027.81	706.458		Organic compounds	Lipids and lipid-like molecules	Glycerophospholipids	Glycerophosphates	1,2-diacylglycerol-3-phosphates	Fatty acids	Glycerophospholipids	Glycerophosphates	931	5566	3250	1135	2390	3751	539	978	7426	995	4035	2658	1269	2543	4149	8637
9398	1028.34	708.473		Organic compounds	Lipids and lipid-like molecules	Glycerophospholipids	NA	Glycerophospholipids	Fatty acids	Glycerophospholipids	Glycerophosphates	982	2418	3679	2915	4625	2252	2147	4664	8709	2028	1189	2621	1084	1155	3905	6641
8475	994.04	781.562		Organic compounds	Lipids and lipid-like molecules	Glycerophospholipids	Glycerophosphocholines	Phosphatidylcholines	Fatty acids	Glycerophospholipids	Glycerophosphocholines	4708	0	2412	1679	1094	2796	7023	1986	5440	7424	3088	3631	3086	1327	5877	2671
8107	976.25	757.561		Organic compounds	Lipids and lipid-like molecules	Glycerophospholipids	Glycerophosphocholines	Phosphatidylcholines	Fatty acids	Glycerophospholipids	Glycerophosphocholines	0	1574	5944	4678	1538	1610	6147	2469	3169	7991	4765	2027	2863	2669	4761	5842
9858	1042.6	672.472		Organic compounds	Lipids and lipid-like molecules	Glycerophospholipids	Glycerophosphates	1,2-diacylglycerol-3-phosphates	Fatty acids	Glycerophospholipids	Glycerophosphates	3418	6149	5366	3734	5225	8390	1894	4996	1831	8710	3049	3825	1959	2405	2102	8062
9747	1037.65	737.5		Organic compounds	Lipids and lipid-like molecules	Glycerophospholipids	Glycerophosphoethanolamines	Phosphatidylethanolamines	Fatty acids	Glycerophospholipids	Glycerophosphoethanolamines	5003	10275	145	1373	3448	5455	3308	6439	7459	2367	1457	315	5508	3549	13675	7910
6838	886.69	594.28		Organic compounds	Lipids and lipid-like molecules	Glycerophospholipids	Glycerophosphoinositols	1-acyl-sn-glycerol-3-phosphoinositols	Fatty acids	Glycerophospholipids	Glycerophosphoinositols	6000	6679	7449	8224	4920	6518	5547	5570	2739	5687	5355	7826	4842	4079	3392	5526
8019	973.35	755.548		Organic compounds	Lipids and lipid-like molecules	Glycerophospholipids	Glycerophosphocholines	Phosphatidylcholines	Fatty acids	Glycerophospholipids	Glycerophosphocholines	3619	2907	7426	4431	1504	2255	18240	7359	8715	8029	0	10647	2423	2150	9926	2268
8937	1010	781.562		Organic compounds	Lipids and lipid-like molecules	Glycerophospholipids	Glycerophosphocholines	Phosphatidylcholines	Fatty acids	Glycerophospholipids	Glycerophosphocholines	9458	0	5872	2756	2204	6467	15588	5010	8687	16341	4884	6911	7240	0	8982	6297
10916	1079.17	735.485		Organic compounds	Lipids and lipid-like molecules	Glycerophospholipids	Glycerophosphoethanolamines	Phosphatidylethanolamines	Fatty acids	Glycerophospholipids	Glycerophosphoethanolamines	6788	2736	1444	1197	15553	2192	3015	855	12121	1640	2373	9512	598	11078	27747	20784
7812	961.44	493.317		Organic compounds	Organic acids and derivatives	Carboxylic acids and derivatives	Amino acids, peptides, and analogues	Amino acids and derivatives	Fatty acids	Glycerophospholipids	Glycerophosphoethanolamines	6828	5935	7207	8535	7896	9813	9607	5812	5243	8326	22250	17513	4077	3752	5250	6395
7341	932.36	432.228		Organic compounds	Lipids and lipid-like molecules	Glycerophospholipids	Glycerophosphates	1-acylglycerol-3-phosphates	Fatty acids	Glycerophospholipids	Glycerophosphates	8464	9079	17055	10367	5439	7266	10163	6993	4631	6635	10383	8166	8801	7818	8217	6984
9482	1028.57	779.547		Organic compounds	Lipids and lipid-like molecules	Glycerophospholipids	Glycerophosphocholines	Phosphatidylcholines	Fatty acids	Glycerophospholipids	Glycerophosphocholines	19835	40430	6880	3094	3402	10225	0	16207	26135	24165	1013	2396	2138	0	2689	12963
7639	954.13	432.228		Organic compounds	Lipids and lipid-like molecules	Glycerophospholipids	Glycerophosphates	1-acylglycerol-3-phosphates	Fatty acids	Glycerophospholipids	Glycerophosphates	14031	15902	16873	19659	10674	11778	17289	14413	5766	11919	10287	14508	9651	8903	5968	9429
9481	1029.33	755.549		Organic compounds	Lipids and lipid-like molecules	Glycerophospholipids	Glycerophosphoethanolamines	Phosphatidylethanolamines	Fatty acids	Glycerophospholipids	Glycerophosphoethanolamines	18197	43072	1017	2382	11089	30455	2505	17699	21306	5973	2060	1196	7807	2715	0	33688
7185	917.93	521.349		Organic compounds	Lipids and lipid-like molecules	Glycerophospholipids	Glycerophosphocholines	1-acyl-sn-glycero-3-phosphocholines	Fatty acids	Glycerophospholipids	Glycerophosphocholines	13080	21603	40467	13738	9486	11073	10373	8999	6867	9699	15703	13443	9883	6974	7560	12681
7273	924.95	479.301		Organic compounds	Organic acids and derivatives	Carboxylic acids and derivatives	Amino acids, peptides, and analogues	Amino acids and derivatives	Fatty acids	Glycerophospholipids	Glycerophosphoethanolamines	17340	21209	22961	16360	7086	13186	17997	21916	10148	12937	20884	39018	16567	15003	9085	13047
8918	1010.39	755.548		Organic compounds	Lipids and lipid-like molecules	Glycerophospholipids	Glycerophosphocholines	Phosphatidylcholines	Fatty acids	Glycerophospholipids	Glycerophosphocholines	21830	10784	16591	11089	4542	11401	38005	15540	17863	25890	21514	22000	19047	5655	28698	9786
8890	1010.76	757.563		Organic compounds	Lipids and lipid-like molecules	Glycerophospholipids	Glycerophosphocholines	Phosphatidylcholines	Fatty acids	Glycerophospholipids	Glycerophosphocholines	34564	92729	9978	3916	0	30913	28181	26304	40825	45524	1667	3079	8717	25239	0	23910
6764	878.27	477.286		Organic compounds	Organic acids and derivatives	Carboxylic acids and derivatives	Amino acids, peptides, and analogues	Amino acids and derivatives	Fatty acids	Glycerophospholipids	Glycerophosphoethanolamines	44263	54559	49214	59753	27644	43246	72221	26164	24789	43130	46760	55233	34322	28926	28533	40537
6664	865.98	477.286		Organic compounds	Organic acids and derivatives	Carboxylic acids and derivatives	Amino acids, peptides, and analogues	Amino acids and derivatives	Fatty acids	Glycerophospholipids	Glycerophosphoethanolamines	49117	55017	104846	50930	25950	34107	63169	24799	30345	31971	64449	47703	32184	28684	44203	48784
7087	910.47	453.286		Organic compounds	Organic acids and derivatives	Carboxylic acids and derivatives	Amino acids, peptides, and analogues	Amino acids and derivatives	Fatty acids	Glycerophospholipids	Glycerophosphoethanolamines	90068	102839	96731	133685	55732	87957	112749	72498	37813	82772	93280	138606	80753	65374	50708	72731
6512	842.41	517.317		Organic compounds	Lipids and lipid-like molecules	Glycerophospholipids	Glycerophosphocholines	1-acyl-sn-glycero-3-phosphocholines	Fatty acids	Glycerophospholipids	Glycerophosphocholines	100418	117601	165637	155450	72974	92553	114906	88069	53573	82707	127233	142082	108590	94426	75131	84439
7147	914.4	495.333		Organic compounds	Lipids and lipid-like molecules	Glycerophospholipids	Glycerophosphocholines	1-acyl-sn-glycero-3-phosphocholines	Fatty acids	Glycerophospholipids	Glycerophosphocholines	109874	114042	120438	162105	90871	137350	119271	93366	46058	133413	118789	150666	90629	85189	63686	88972
9677	1036.92	368.293		Organic compounds	Benzenoids	NA	NA	Benzenoids	Alkaloids	Guanidine alkaloids	Tricyclic guanidine alkaloids	1229	1414	1400	1318	1257	1222	1663	1222	1127	1297	1151	1658	1660	1595	1668	1126
9318	1022.45	613.478		Organic compounds	Organic acids and derivatives	Carboxylic acids and derivatives	Amino acids, peptides, and analogues	Amino acids and derivatives	Alkaloids	Guanidine alkaloids	Simple amide alkaloids	0	0	0	0	0	0	0	0	0	0	2124	0	21208	0	0	0
7111	912.71	765.54		Organic compounds	Organic acids and derivatives	Carboxylic acids and derivatives	Amino acids, peptides, and analogues	N-acyl-alpha amino acids and derivatives	Alkaloids	Guanidine alkaloids	Polyamines	0	2139	0	2051	0	1524	2806	2720	2485	3739	97	1016	1223	3093	3062	2250
9715	1036.37	395.359		Organic compounds	Organoheterocyclic compounds	Triazines	Aminotriazines	Aminotriazines	Alkaloids	Guanidine alkaloids	Tricyclic guanidine alkaloids	1227	1312	1318	983	1394	1030	3642	1253	1456	1894	2909	1258	1180	4002	2808	1554
10676	1068.77	462.371		Organic compounds	Organoheterocyclic compounds	Heteroaromatic compounds	NA	Heteroaromatic compounds	Alkaloids	Guanidine alkaloids	Acyclic guanidine alkaloids	903	1952	3011	2771	1357	5834	0	3222	2342	4920	335	1884	0	347	372	1648
9662	1035.91	442.328		Organic compounds	Lipids and lipid-like molecules	Fatty Acyls	Fatty acids and conjugates	Amino fatty acids	Fatty acids	Guanidine alkaloids	Imidazole alkaloids	9264	9771	10297	9282	9161	8989	11535	8853	8826	9313	10409	9656	12099	11560	11755	9269
6910	889.87	292.202		Organic compounds	Organoheterocyclic compounds	Azoles	NA	Azoles	Alkaloids	NA	NA	0	3137	1260	2813	11178	10951	862	2962	2439	11892	2798	3377	4632	4600	3391	2952
4831	251.54	326.115		Organic compounds	Organoheterocyclic compounds	Benzopyrans	1-benzopyrans	1-benzopyrans	Shikimates and Phenylpropanoids	Isoflavonoids	Rotenoids	9189	2127	8658	19102	5463	3980	13311	4740	4131	2309	14679	13194	17936	15254	4865	752
1183	551.1	340.131		Organic compounds	Benzenoids	Phenols	Methoxyphenols	Methoxyphenols	Shikimates and Phenylpropanoids	Lignans	Angucyclines	837	828	1385	1080	1494	1677	2319	1680	697	1351	1337	1214	1631	1692	1007	1086
5868	623.36	516.164		Organic compounds	Lignans, neolignans and related compounds	Lignan glycosides	NA	Lignan glycosides	Shikimates and Phenylpropanoids	Lignans	Neolignans	1567	2137	3366	923	918	1170	764	497	1338	1086	3097	2031	2166	2202	994	469
6915	892.34	372.157		Organic compounds	Benzenoids	Phenols	1-hydroxy-2-unsubstituted benzenoids	1-hydroxy-2-unsubstituted benzenoids	Shikimates and Phenylpropanoids	Lignans	Neolignans	1912	1728	1817	1839	1648	1523	1886	1611	1822	1939	2269	2029	1748	1920	2102	2068
5021	264.77	390.131		Organic compounds	Lignans, neolignans and related compounds	Lignan lactones	NA	Lignan lactones	Shikimates and Phenylpropanoids	Lignans	Neolignans	1629	1550	3727	2365	4509	2769	2232	2486	1857	1241	801	3783	0	3302	2248	3170
4915	255.45	520.195		Organic compounds	Lignans, neolignans and related compounds	Lignan glycosides	NA	Lignan glycosides	Shikimates and Phenylpropanoids	Lignans	Neolignans	3386	3637	1663	3200	1148	1863	5481	2618	1379	1954	1000	2149	6008	6589	1059	765
5017	262.84	358.141		Organic compounds	Lignans, neolignans and related compounds	NA	NA	Lignans, neolignans and related compounds	Shikimates and Phenylpropanoids	Lignans	Angucyclines	3271	2050	2116	3704	2008	1253	3620	2610	3904	1040	4334	3378	3044	2778	2827	2438
5515	344.35	472.174		Organic compounds	Organic oxygen compounds	Organooxygen compounds	Carbohydrates and carbohydrate conjugates	Hexoses	Shikimates and Phenylpropanoids	Lignans	Neolignans	3567	3614	2458	4050	1628	2788	3396	2724	2545	2713	2599	2828	5111	4169	2662	1415
1049	408.67	567.232		Organic compounds	Lipids and lipid-like molecules	Fatty Acyls	Fatty acyl glycosides	Alkyl glycosides	Alkaloids	Lignans	Isoquinoline alkaloids	7834	3976	2395	4430	1290	1033	4186	2413	2072	668	6586	4029	2639	2763	3103	4144
5492	339.9	372.12		Organic compounds	Organoheterocyclic compounds	Benzodioxoles	NA	Benzodioxoles	Shikimates and Phenylpropanoids	Lignans	Neolignans	5647	4443	3848	3415	1453	2678	3062	2712	2818	2533	2567	5216	3629	3203	3474	4472
5457	329.72	522.211		Organic compounds	Lignans, neolignans and related compounds	Lignan glycosides	NA	Lignan glycosides	Shikimates and Phenylpropanoids	Lignans	Arylnaphthalene and aryltetralin lignans	7662	1278	5705	4616	1445	2228	2952	5082	2249	1937	5663	5044	3926	3378	3245	2238
5669	410.51	356.126		Organic compounds	Lignans, neolignans and related compounds	Furanoid lignans	Tetrahydrofuran lignans	Dibenzylbutyrolactone lignans	Shikimates and Phenylpropanoids	Lignans	Dibenzylbutyrolactone lignans	5305	3349	5085	4753	5826	5589	2570	3555	2569	4719	4724	2981	5562	5718	2459	2118
5008	262.11	340.13		Organic compounds	Benzenoids	Phenols	Methoxyphenols	Methoxyphenols	Shikimates and Phenylpropanoids	Lignans	Neolignans	6709	3485	3889	6497	2512	2141	6733	4776	7206	1965	7268	6619	5482	4670	4529	5122
5623	386.38	358.141		Organic compounds	Lignans, neolignans and related compounds	Furanoid lignans	Furofuran lignans	Furofuran lignans	Shikimates and Phenylpropanoids	Lignans	Furofuranoid lignans	7175	5092	5843	5897	2553	2765	6250	4743	5268	2171	7165	6309	6409	6227	3108	5024
6349	821.97	729.28		Organic compounds	Benzenoids	Naphthalenes	Naphthalenecarboxylic acids and derivatives	Naphthalenecarboxylic acids and derivatives	Polyketides	Lignans	Isoquinoline alkaloids	3633	3554	7862	4867	7223	6601	1238	4782	4517	4754	6319	6208	6161	4654	6212	4070
5613	383.62	372.121		Organic compounds	Lignans, neolignans and related compounds	NA	NA	Lignans, neolignans and related compounds	Shikimates and Phenylpropanoids	Lignans	Dibenzylbutyrolactone lignans	8149	1449	8870	6139	8815	8065	8688	3575	5339	6455	10276	3873	8622	9234	13092	17020
4837	251.27	488.169		Organic compounds	Lignans, neolignans and related compounds	NA	NA	Lignans, neolignans and related compounds	Shikimates and Phenylpropanoids	Lignans	Neolignans	9939	1891	8111	19537	7615	4839	11430	3998	4857	2286	15729	15450	15744	13913	4175	557
5637	386.04	537.222		Organic compounds	Lignans, neolignans and related compounds	NA	NA	Lignans, neolignans and related compounds	Alkaloids	Lignans	Neolignans	39632	21263	27463	42250	12283	7022	34228	26467	28285	2452	40092	34106	28651	27707	10465	26200
5406	323.33	502.184		Organic compounds	Lignans, neolignans and related compounds	NA	NA	Lignans, neolignans and related compounds	Shikimates and Phenylpropanoids	Lignans	Neolignans	82647	65999	75335	92392	48531	64107	79667	73934	61098	61251	95580	93179	115676	106763	64480	52425
7962	968.78	617.419		Organic compounds	Lipids and lipid-like molecules	Steroids and steroid derivatives	NA	Steroids and steroid derivatives	Terpenoids	Linear polyketides	Open-chain polyketides	478	508	503	527	568	710	451	526	593	842	488	781	570	561	293	712
10331	1058.65	582.428		Organic compounds	Lipids and lipid-like molecules	Fatty Acyls	Lineolic acids and derivatives	Lineolic acids and derivatives	Polyketides	Linear polyketides	Open-chain polyketides	817	758	844	791	1035	970	455	780	836	1069	0	840	0	0	0	782
9386	1026.04	599.409		Organic compounds	Benzenoids	Benzene and substituted derivatives	NA	Benzene and substituted derivatives	Terpenoids	Linear polyketides	Open-chain polyketides	670	770	812	996	758	959	709	780	0	761	460	1046	616	631	584	1064
7830	963.16	599.41		Organic compounds	Lipids and lipid-like molecules	Fatty Acyls	Fatty amides	N-acyl amines	Polyketides	Linear polyketides	Open-chain polyketides	1098	614	1228	1200	1040	1268	0	1188	1168	1112	0	1272	0	0	0	1201
7719	955.08	571.433		Organic compounds	Organic acids and derivatives	Carboxylic acids and derivatives	Amino acids, peptides, and analogues	Amino acids and derivatives	Polyketides	Linear polyketides	Open-chain polyketides	1085	1100	1300	894	1940	1620	0	690	1753	1507	0	1962	0	0	0	1854
7071	907.61	598.46		Organic compounds	Lipids and lipid-like molecules	Fatty Acyls	Fatty acid esters	Fatty acid esters	Terpenoids	Linear polyketides	Open-chain polyketides	1094	1093	1448	1125	1852	1420	0	1282	1874	1805	0	1750	0	0	0	2249
10480	1061.6	611.467		Organic compounds	Organic acids and derivatives	Carboxylic acids and derivatives	Amino acids, peptides, and analogues	Alpha amino acids and derivatives	Polyketides	Linear polyketides	Open-chain polyketides	910	1015	1101	941	1441	1834	831	1044	955	1731	861	1312	838	1299	885	1007
1481	780.43	307.179		Organic compounds	Organoheterocyclic compounds	Pyrrolidines	Pyrrolidones	Pyrrolidones	Alkaloids	Linear polyketides	Piperidine alkaloids	1052	1294	1180	1019	1161	1267	1265	1319	1206	1299	1345	1207	1053	1259	1202	1188
7572	947.29	430.257		Organic compounds	Organic acids and derivatives	Carboxylic acids and derivatives	Tricarboxylic acids and derivatives	Tricarboxylic acids and derivatives	Fatty acids	Linear polyketides	Wax monoesters	1316	1318	1424	1319	1492	1166	1412	1099	1217	1084	1118	1052	1336	1116	1301	996
9830	1042.85	582.43		Organic compounds	Lipids and lipid-like molecules	Fatty Acyls	Fatty acid esters	Fatty acid esters	Polyketides	Linear polyketides	Open-chain polyketides	1672	1593	1414	1608	1688	1694	712	1318	1514	1581	838	1721	659	718	829	1494
5978	688.8	522.268		Organic compounds	Organic oxygen compounds	Organooxygen compounds	Carbohydrates and carbohydrate conjugates	O-glycosyl compounds	Polyketides	Linear polyketides	Fatty acyl glycosides of mono- and disaccharides	1202	1448	1489	1293	1468	1334	1270	1263	1451	1247	1220	1533	1432	1125	1376	1675
7025	903.06	422.266		Organic compounds	Lipids and lipid-like molecules	Fatty Acyls	Fatty alcohols	Fatty alcohols	Polyketides	Linear polyketides	Open-chain polyketides	1591	1289	2979	2305	2277	2012	983	1155	685	1688	1007	1106	1035	831	586	1684
10003	1047.12	598.496		Organic compounds	Lipids and lipid-like molecules	Prenol lipids	NA	Prenol lipids	Terpenoids	Linear polyketides	Diacylglycerols	1985	1728	1109	383	1229	807	940	938	2146	2477	1995	1175	2040	1217	1566	2078
10011	1047.41	551.421		Organic compounds	Lipids and lipid-like molecules	Steroids and steroid derivatives	Bile acids, alcohols and derivatives	Hydroxy bile acids, alcohols and derivatives	Polyketides	Linear polyketides	Open-chain polyketides	2375	1673	1926	2051	2662	2356	0	1642	2302	2646	0	2491	0	0	0	3108
10681	1069.07	466.368		Organic compounds	Lipids and lipid-like molecules	Prenol lipids	Sesterterpenoids	Sesterterpenoids	Terpenoids	Linear polyketides	Open-chain polyketides	1345	1821	1837	2013	2450	2113	1648	1863	1365	2091	1567	2152	2742	2874	2740	1842
7826	963.73	482.361		Organic compounds	Lipids and lipid-like molecules	Fatty Acyls	NA	Fatty Acyls	Fatty acids	Linear polyketides	Open-chain polyketides	1343	1131	1381	1798	10602	6116	1127	2235	1043	5673	1716	1659	1667	1681	1911	1874
6104	758.04	324.193		Organic compounds	Lipids and lipid-like molecules	NA	NA	Lipids and lipid-like molecules	Polyketides	Linear polyketides	Open-chain polyketides	1089	928	1159	1384	10582	9582	677	1645	862	8777	1111	1091	1167	1176	1655	1150
8817	1009.28	599.411		Organic compounds	Lipids and lipid-like molecules	Steroids and steroid derivatives	NA	Steroids and steroid derivatives	Terpenoids	Linear polyketides	Open-chain polyketides	3089	4542	2864	4282	2540	3841	5063	3282	2750	3273	2662	4857	3888	4207	4410	5571
7876	964.47	422.267		Organic compounds	Organic oxygen compounds	Organooxygen compounds	Carbohydrates and carbohydrate conjugates	Hexoses	Polyketides	Linear polyketides	Open-chain polyketides	827	7406	13168	17731	916	17803	334	19429	2091	11247	352	1664	244	344	337	1359
5666	407.7	264.099		Organic compounds	Benzenoids	Benzene and substituted derivatives	NA	Benzene and substituted derivatives	Polyketides	Linear polyketides	Open-chain polyketides	13497	7311	4820	10195	2929	2025	8113	5771	5225	1401	11025	8623	5217	5792	6743	7299
964	343.91	569.248		Organic compounds	Organic acids and derivatives	Carboxylic acids and derivatives	Amino acids, peptides, and analogues	Amino acids and derivatives	Alkaloids	Lysine alkaloids	Pyridine alkaloids	2210	581	820	1443	373	1014	606	1051	789	1181	1524	1060	1022	711	1197	572
10327	1057.36	354.189		Organic compounds	Organic acids and derivatives	Carboxylic acids and derivatives	Amino acids, peptides, and analogues	Amino acids and derivatives	Alkaloids	Lysine alkaloids	Piperidine alkaloids	2473	2495	2214	2736	2513	2576	1966	2409	2087	2412	2125	1535	1921	2185	2001	1998
10234	1054.08	266.164		Organic compounds	Organic acids and derivatives	Carboxylic acids and derivatives	Amino acids, peptides, and analogues	Amino acids and derivatives	Amino acids and Peptides	Lysine alkaloids	Dipeptides	3126	3228	2970	3273	3249	3432	3183	3129	3130	3104	3381	2849	3417	3188	3231	3416
1793	907.41	495.34		Organic compounds	Organic acids and derivatives	Carboxylic acids and derivatives	Amino acids, peptides, and analogues	Alpha amino acids and derivatives	Alkaloids	Lysine alkaloids	Piperidine alkaloids	4455	5204	4989	4816	4606	4957	5164	4623	4477	5293	5111	5982	4552	4621	4981	5604
1573	826.44	294.182		Organic compounds	Benzenoids	Phenol ethers	NA	Phenol ethers	Terpenoids	Meroterpenoids	Prenyl quinone meroterpenoids	901	845	707	900	1081	956	1003	1004	1023	977	927	915	967	1113	871	1033
9991	1046.45	428.365		Organic compounds	Lipids and lipid-like molecules	Prenol lipids	Quinone and hydroquinone lipids	Tocopherols	Terpenoids	Meroterpenoids	Prenyl quinone meroterpenoids	8491	4692	5747	4979	5052	6960	7447	5450	7689	9445	8889	7200	9558	1122	962	7445
10041	1047.82	438.313		Organic compounds	Benzenoids	Phenol ethers	NA	Phenol ethers	Terpenoids	Meroterpenoids	Catechols with side chains	39604	34756	44898	35636	890	34968	51271	46013	42424	48296	31359	37285	49416	38371	38981	41009
5902	641.92	212.105		Organic compounds	Organic acids and derivatives	Carboxylic acids and derivatives	Carboxylic acid derivatives	Carboxylic acid esters	Polyketides	Monoterpenoids	2-pyrone derivatives	762	689	854	664	737	763	1269	747	833	1211	846	800	807	824	634	815
5282	296.31	539.183		Organic compounds	Organic acids and derivatives	Carboxylic acids and derivatives	Amino acids, peptides, and analogues	Amino acids and derivatives	Terpenoids	Monoterpenoids	Iridoids monoterpenoids	359	585	2429	902	980	647	592	609	747	247	1380	785	1434	1255	531	809
1453	761.4	253.204		Organic compounds	Organic nitrogen compounds	Organonitrogen compounds	Amines	Aralkylamines	Alkaloids	Monoterpenoids	Phenylalanine-derived alkaloids	1233	1346	1236	1692	1609	0	1083	1174	1653	1145	1490	1213	1334	1784	1938	1469
5405	322.13	404.149		Organic compounds	Benzenoids	Benzene and substituted derivatives	Benzoic acids and derivatives	Benzoic acids and derivatives	Terpenoids	Monoterpenoids	Depsides	1690	2297	1041	2469	1699	2815	1306	1881	1148	2689	1662	1632	2733	2402	1882	3003
4940	259.05	552.185		Organic compounds	Phenylpropanoids and polyketides	Cinnamic acids and derivatives	Hydroxycinnamic acids and derivatives	Coumaric acids and derivatives	Shikimates and Phenylpropanoids	Monoterpenoids	Iridoids monoterpenoids	746	1540	2189	3769	2066	3438	1777	2349	1952	3697	3552	2723	1783	1991	1933	460
5313	305.21	536.19		Organic compounds	Lipids and lipid-like molecules	Prenol lipids	Terpene glycosides	Iridoid O-glycosides	Terpenoids	Monoterpenoids	Iridoids monoterpenoids	6413	979	845	4790	3734	2275	3399	777	497	465	4246	7367	1317	1723	2027	780
7349	932.76	194.094		Organic compounds	Benzenoids	Phenol ethers	Anisoles	Anisoles	Shikimates and Phenylpropanoids	Monoterpenoids	Cinnamic acids and derivatives	8998	10781	10096	10125	9734	10555	11903	9511	11388	9485	12336	9996	13211	12836	13393	11684
10007	1047.34	516.379		NA	NA	NA	NA	NA	NA	NA	NA	362	672	0	493	0	669	417	1200	1082	553	0	349	834	0	542	829
2385	1060	1264.89		NA	NA	NA	NA	NA	NA	NA	NA	666	737	925	0	0	0	0	762	759	959	604	0	824	0	900	869
7744	956.58	396.252		NA	NA	NA	NA	NA	NA	NA	NA	513	436	247	438	314	1016	334	197	624	779	368	351	529	592	564	703
10515	1062.78	532.411		NA	NA	NA	NA	NA	NA	NA	NA	491	612	479	565	889	792	242	542	462	724	239	496	219	226	351	677
4812	250.36	276.111		NA	NA	NA	NA	NA	NA	NA	NA	550	587	1197	171	756	832	285	279	149	147	275	389	439	679	117	1158
1460	765.11	287.282		NA	NA	NA	NA	NA	NA	NA	NA	529	452	470	626	514	544	429	555	480	507	504	441	471	489	510	501
1378	710.53	309.172		NA	NA	NA	NA	NA	NA	NA	NA	339	896	303	234	585	1868	282	201	154	1945	226	281	133	98	0	477
8928	1012.29	168.188		NA	NA	NA	NA	NA	NA	NA	NA	558	458	490	483	527	547	581	425	473	610	486	514	474	418	448	531
10361	1058.9	494.34		NA	NA	NA	NA	NA	NA	NA	NA	228	338	656	537	339	572	397	437	197	648	584	419	1208	800	380	283
2372	1056.59	674.525		NA	NA	NA	NA	NA	NA	NA	NA	709	1342	544	742	812	0	0	477	458	583	667	560	0	510	0	620
1883	935.81	119.05		NA	NA	NA	NA	NA	NA	NA	NA	725	482	588	534	536	737	439	630	585	657	320	492	245	303	390	368
1075	435.94	340.185		NA	NA	NA	NA	NA	NA	NA	NA	414	231	968	335	804	735	458	284	238	573	386	283	647	673	359	648
1303	656.01	394.117		NA	NA	NA	NA	NA	NA	NA	NA	442	340	982	208	0	428	404	332	267	703	489	543	877	895	663	464
245	62.29	188.079		NA	NA	NA	NA	NA	NA	NA	NA	421	605	483	529	593	490	508	412	206	430	319	501	638	647	651	610
5324	305.33	160.053		NA	NA	NA	NA	NA	NA	NA	NA	894	217	179	880	802	436	750	155	51	152	981	1402	241	338	437	137
8714	1004.08	608.289		NA	NA	NA	NA	NA	NA	NA	NA	934	733	549	746	316	424	194	754	717	851	0	765	146	265	213	450
6577	854.95	386.245		NA	NA	NA	NA	NA	NA	NA	NA	406	509	594	516	641	687	535	878	354	403	232	697	414	360	318	513
7318	928.95	840.505		NA	NA	NA	NA	NA	NA	NA	NA	149	1140	280	880	611	207	868	857	834	102	724	0	674	0	528	204
10078	1048.97	528.38		NA	NA	NA	NA	NA	NA	NA	NA	645	407	434	823	764	643	237	722	812	712	204	0	280	195	235	945
2600	50.68	166.006		NA	NA	NA	NA	NA	NA	NA	NA	409	536	445	425	398	487	469	514	383	499	524	629	633	574	551	590
9234	1018.58	606.485		NA	NA	NA	NA	NA	NA	NA	NA	916	882	685	528	602	676	142	703	507	599	224	668	0	146	285	504
10163	1052.23	583.428		NA	NA	NA	NA	NA	NA	NA	NA	915	639	666	681	603	0	495	0	901	734	686	760	0	533	457	0
2824	55.43	841.686		NA	NA	NA	NA	NA	NA	NA	NA	376	805	653	660	681	912	891	509	0	0	609	535	573	0	0	890
11055	184.65	257.066		NA	NA	NA	NA	NA	NA	NA	NA	374	414	663	497	422	702	403	506	205	656	301	383	614	499	686	772
4620	236.35	252.056		NA	NA	NA	NA	NA	NA	NA	NA	708	423	698	298	762	838	295	363	353	797	266	434	477	358	307	721
10000	1047.1	292.189		NA	NA	NA	NA	NA	NA	NA	NA	383	408	540	726	521	496	692	0	774	0	0	682	730	831	830	487
3763	62.25	171.09		NA	NA	NA	NA	NA	NA	NA	NA	491	513	520	521	645	580	409	506	239	693	466	268	631	643	410	565
7943	967.7	737.5		NA	NA	NA	NA	NA	NA	NA	NA	533	569	383	703	346	669	483	708	0	616	325	429	0	803	1071	462
6692	869.54	575.252		NA	NA	NA	NA	NA	NA	NA	NA	482	637	1095	639	292	629	530	346	381	334	685	472	390	280	411	513
6001	696.22	178.136		NA	NA	NA	NA	NA	NA	NA	NA	412	501	414	678	445	0	523	490	516	404	478	507	708	698	746	598
6499	837.98	337.263		NA	NA	NA	NA	NA	NA	NA	NA	635	544	677	619	997	1219	0	510	370	1043	0	403	523	0	0	580
10617	1067.7	241.168		NA	NA	NA	NA	NA	NA	NA	NA	1048	571	791	445	1002	866	0	466	572	576	316	228	234	370	338	308
10152	1051.02	786.653		NA	NA	NA	NA	NA	NA	NA	NA	738	0	0	0	837	0	0	0	1185	0	1053	957	1023	0	1183	1156
2508	44.72	256.24		NA	NA	NA	NA	NA	NA	NA	NA	589	517	608	542	654	0	512	513	696	433	502	515	454	436	691	479
265	62.54	448.133		NA	NA	NA	NA	NA	NA	NA	NA	512	775	596	476	0	0	570	565	343	0	472	499	713	917	571	1133
1656	859.22	1412.69		NA	NA	NA	NA	NA	NA	NA	NA	318	202	960	230	1718	1263	0	308	305	485	375	543	340	216	879	0
10538	1063.25	162.125		NA	NA	NA	NA	NA	NA	NA	NA	553	605	525	431	447	535	396	570	500	506	502	552	411	455	586	574
7628	951.62	571.434		NA	NA	NA	NA	NA	NA	NA	NA	1025	1293	0	932	0	0	0	575	1567	1292	0	0	0	0	0	1469
4440	224.54	310.138		NA	NA	NA	NA	NA	NA	NA	NA	0	0	566	583	173	149	550	362	614	234	440	489	1493	1398	744	358
4246	198.98	198.053		NA	NA	NA	NA	NA	NA	NA	NA	1070	194	404	388	300	349	590	686	317	283	526	406	854	740	716	330
2366	1054.66	442.38		NA	NA	NA	NA	NA	NA	NA	NA	287	298	345	461	762	542	518	591	0	247	508	554	518	559	775	1190
10116	1051.93	166.136		NA	NA	NA	NA	NA	NA	NA	NA	402	471	430	565	527	591	735	506	518	454	453	467	503	501	451	587
1957	959.83	569.416		NA	NA	NA	NA	NA	NA	NA	NA	0	0	0	0	0	0	1332	0	0	0	1717	0	1607	1693	1812	0
10989	1079.16	366.31		NA	NA	NA	NA	NA	NA	NA	NA	551	0	527	471	440	918	381	517	393	656	593	532	754	491	601	337
5137	271.51	501.148		NA	NA	NA	NA	NA	NA	NA	NA	600	427	901	0	274	425	252	572	293	481	421	886	1029	877	320	406
3707	61.23	329.112		NA	NA	NA	NA	NA	NA	NA	NA	494	469	531	640	622	488	669	0	496	172	495	727	551	500	847	466
4905	255.77	332.148		NA	NA	NA	NA	NA	NA	NA	NA	419	566	256	390	489	1412	418	216	215	1509	431	383	411	259	265	544
8393	991.34	174.14		NA	NA	NA	NA	NA	NA	NA	NA	494	558	379	680	605	464	482	562	365	627	482	417	409	484	532	646
3835	62.48	119.04		NA	NA	NA	NA	NA	NA	NA	NA	632	603	215	736	742	1297	642	351	0	1279	417	554	225	110	108	277
8975	1009.95	793.527		NA	NA	NA	NA	NA	NA	NA	NA	1031	454	286	241	1214	413	0	344	1410	0	0	1544	0	0	448	804
10976	1079.76	535.158		NA	NA	NA	NA	NA	NA	NA	NA	409	299	1122	143	406	751	1645	555	337	840	270	329	272	337	222	265
3349	57.87	155.02		NA	NA	NA	NA	NA	NA	NA	NA	501	519	572	441	493	653	465	711	222	480	529	394	357	514	765	590
6344	822.08	162.141		NA	NA	NA	NA	NA	NA	NA	NA	529	381	681	457	772	644	249	442	337	482	564	640	431	523	540	536
844	282.46	161.088		NA	NA	NA	NA	NA	NA	NA	NA	529	407	783	398	236	73	394	762	71	357	754	542	614	612	473	1207
1247	607.25	525.136		NA	NA	NA	NA	NA	NA	NA	NA	1419	531	988	313	0	295	449	166	218	287	299	489	749	798	335	877
8249	984.29	599.499		NA	NA	NA	NA	NA	NA	NA	NA	732	530	467	228	0	432	308	522	412	745	934	446	872	567	470	557
3857	62.59	122.004		NA	NA	NA	NA	NA	NA	NA	NA	439	371	551	492	989	988	412	415	331	778	484	259	437	418	312	549
5528	348.15	502.184		NA	NA	NA	NA	NA	NA	NA	NA	332	218	449	284	360	584	115	549	192	619	1458	101	1118	903	863	80
1502	787.55	641.279		NA	NA	NA	NA	NA	NA	NA	NA	526	728	525	513	0	524	548	680	623	478	381	523	593	469	483	632
7656	953.17	266.187		NA	NA	NA	NA	NA	NA	NA	NA	474	437	611	368	645	445	480	696	643	490	419	446	381	465	746	481
3831	62.32	148.037		NA	NA	NA	NA	NA	NA	NA	NA	384	409	563	572	376	547	610	532	326	515	606	472	497	491	645	686
414	209.7	192.006		NA	NA	NA	NA	NA	NA	NA	NA	319	136	785	715	727	404	392	0	77	291	517	564	1305	1106	694	201
3067	54.8	985.689		NA	NA	NA	NA	NA	NA	NA	NA	873	1017	0	715	0	1132	692	850	0	738	499	785	0	0	0	933
11078	854.74	510.281		NA	NA	NA	NA	NA	NA	NA	NA	427	435	519	508	688	560	412	464	459	655	627	565	457	458	631	373
3158	55.56	731.716		NA	NA	NA	NA	NA	NA	NA	NA	0	894	0	1150	1424	0	1089	1028	440	1196	0	0	0	0	0	1018
3868	62.83	404.002		NA	NA	NA	NA	NA	NA	NA	NA	619	588	471	633	453	531	642	524	531	507	516	549	586	0	521	570
5296	300.65	520.194		NA	NA	NA	NA	NA	NA	NA	NA	1160	208	904	799	0	303	390	359	256	206	755	793	678	604	273	553
9978	1045.99	311.225		NA	NA	NA	NA	NA	NA	NA	NA	726	730	336	386	271	0	525	626	0	329	807	324	1263	1026	520	374
1608	835.48	690.313		NA	NA	NA	NA	NA	NA	NA	NA	457	335	486	305	887	545	0	425	423	532	801	892	490	551	649	467
7158	914.99	218.203		NA	NA	NA	NA	NA	NA	NA	NA	447	445	557	393	622	556	341	516	558	529	544	619	332	522	656	609
5359	311.63	346.105		NA	NA	NA	NA	NA	NA	NA	NA	412	545	586	725	418	399	341	619	406	408	1444	494	590	518	58	285
3109	54.98	239.959		NA	NA	NA	NA	NA	NA	NA	NA	519	382	856	734	362	428	324	565	772	398	493	550	468	536	371	492
1244	604.45	189.025		NA	NA	NA	NA	NA	NA	NA	NA	774	473	1173	255	930	992	190	372	279	890	237	103	320	298	334	633
10425	1059.85	468.345		NA	NA	NA	NA	NA	NA	NA	NA	381	372	415	349	712	760	333	461	331	726	479	608	549	599	506	675
2143	1008.19	1156.69		NA	NA	NA	NA	NA	NA	NA	NA	529	671	984	594	440	782	234	722	450	534	395	390	462	393	303	381
2920	53.6	345.881		NA	NA	NA	NA	NA	NA	NA	NA	364	594	458	653	453	637	415	232	131	654	661	477	711	629	650	545
5703	436.54	371.1		NA	NA	NA	NA	NA	NA	NA	NA	357	242	1041	185	0	526	361	618	281	904	428	325	864	704	739	694
8701	1004.8	478.33		NA	NA	NA	NA	NA	NA	NA	NA	294	379	460	316	359	668	493	692	711	672	419	538	734	440	645	453
8836	1008.58	797.558		NA	NA	NA	NA	NA	NA	NA	NA	1113	1477	182	280	630	543	0	382	667	0	156	612	0	615	1085	532
11097	826.97	486.283		NA	NA	NA	NA	NA	NA	NA	NA	560	455	565	759	504	770	509	483	310	605	414	545	392	439	523	446
3498	58.89	416.153		NA	NA	NA	NA	NA	NA	NA	NA	419	341	483	433	552	592	272	355	459	657	688	354	610	583	685	798
2761	52.95	797.778		NA	NA	NA	NA	NA	NA	NA	NA	840	564	612	602	748	806	888	706	308	0	543	0	550	621	498	0
1162	506.76	393.105		NA	NA	NA	NA	NA	NA	NA	NA	734	887	663	271	202	289	168	661	155	339	629	321	626	721	1147	473
10154	1052.22	110.074		NA	NA	NA	NA	NA	NA	NA	NA	370	580	788	500	448	633	456	449	495	586	584	477	527	469	455	474
3910	70.02	554.896		NA	NA	NA	NA	NA	NA	NA	NA	765	850	706	655	359	424	840	644	108	341	443	504	450	474	247	483
3819	62.22	375.116		NA	NA	NA	NA	NA	NA	NA	NA	623	623	774	529	527	457	272	556	331	494	436	345	632	515	332	848
10722	1071.56	121.075		NA	NA	NA	NA	NA	NA	NA	NA	714	611	852	368	637	436	0	0	473	539	678	423	572	607	764	622
7074	907.94	334.21		NA	NA	NA	NA	NA	NA	NA	NA	171	412	465	305	658	900	252	392	340	1168	309	525	662	661	839	238
2694	52.71	685.81		NA	NA	NA	NA	NA	NA	NA	NA	358	640	611	675	557	551	531	591	292	212	627	535	573	449	753	343
10339	1058.09	608.288		NA	NA	NA	NA	NA	NA	NA	NA	802	725	653	689	358	530	275	805	842	757	136	702	190	166	214	458
4644	235.76	551.222		NA	NA	NA	NA	NA	NA	NA	NA	1280	500	172	632	93	0	984	0	171	214	1751	527	510	532	561	376
2429	1067.59	286.19		NA	NA	NA	NA	NA	NA	NA	NA	704	477	541	513	659	473	451	532	457	513	518	435	537	497	511	486
80	53.71	610.018		NA	NA	NA	NA	NA	NA	NA	NA	674	714	527	662	390	423	680	430	314	381	510	614	399	508	473	606
2586	50.3	173.018		NA	NA	NA	NA	NA	NA	NA	NA	466	577	458	475	515	567	546	393	255	482	562	612	779	631	509	486
2751	52.84	661.807		NA	NA	NA	NA	NA	NA	NA	NA	666	634	1106	762	648	809	0	0	542	689	719	770	969	0	0	0
789	265.01	220.031		NA	NA	NA	NA	NA	NA	NA	NA	301	868	257	393	269	562	200	773	179	619	563	367	859	908	532	664
7743	957.68	448.297		NA	NA	NA	NA	NA	NA	NA	NA	812	2217	0	376	0	0	881	0	0	0	792	1664	421	353	278	520
8172	980.36	687.493		NA	NA	NA	NA	NA	NA	NA	NA	324	0	798	577	0	741	681	414	636	541	521	464	637	918	616	447
8579	997.76	417.231		NA	NA	NA	NA	NA	NA	NA	NA	1770	894	937	0	750	0	836	0	0	0	488	834	0	994	0	812
5915	650.53	290.188		NA	NA	NA	NA	NA	NA	NA	NA	328	266	343	368	1673	1163	285	431	231	1185	283	303	414	312	510	225
2736	52.72	753.795		NA	NA	NA	NA	NA	NA	NA	NA	542	0	769	704	647	884	0	670	475	697	535	683	945	0	0	773
7661	954.33	457.298		NA	NA	NA	NA	NA	NA	NA	NA	352	786	298	199	666	2662	193	189	133	1501	439	216	0	206	193	294
3292	57.14	302.904		NA	NA	NA	NA	NA	NA	NA	NA	595	488	495	392	612	593	948	771	99	640	320	425	470	307	427	745
3999	87.14	493.083		NA	NA	NA	NA	NA	NA	NA	NA	660	809	478	538	443	506	562	686	72	458	519	542	546	640	376	493
913	318.59	544.157		NA	NA	NA	NA	NA	NA	NA	NA	321	649	321	299	537	872	236	287	0	829	1059	812	694	694	395	323
1660	859.36	799.458		NA	NA	NA	NA	NA	NA	NA	NA	331	231	909	359	1203	879	73	407	453	592	450	428	385	367	788	475
2908	53.82	423.836		NA	NA	NA	NA	NA	NA	NA	NA	440	760	414	644	517	641	630	342	134	563	519	434	482	528	518	769
4776	245.57	568.152		NA	NA	NA	NA	NA	NA	NA	NA	1306	1157	1314	753	128	452	440	151	197	469	268	324	372	380	143	483
8708	1005.16	408.284		NA	NA	NA	NA	NA	NA	NA	NA	622	0	451	463	689	710	692	570	608	533	750	691	619	542	0	403
7216	921.15	578.277		NA	NA	NA	NA	NA	NA	NA	NA	480	586	941	391	397	521	361	438	309	684	334	497	736	610	507	555
2238	1027.78	327.278		NA	NA	NA	NA	NA	NA	NA	NA	588	889	560	336	561	777	340	454	429	1119	498	461	385	319	372	264
8215	984.46	358.306		NA	NA	NA	NA	NA	NA	NA	NA	0	0	1879	0	2069	1391	0	0	0	0	1749	1265	0	0	0	0
7067	906.87	332.196		NA	NA	NA	NA	NA	NA	NA	NA	260	303	341	329	1455	1579	297	201	288	1470	285	335	297	213	381	320
1739	892.32	348.123		NA	NA	NA	NA	NA	NA	NA	NA	503	336	377	268	794	1361	303	290	324	1019	390	311	656	573	359	492
6323	821.98	838.421		NA	NA	NA	NA	NA	NA	NA	NA	175	246	1201	341	1531	911	0	473	303	311	541	526	579	436	784	0
1964	962.45	712.491		NA	NA	NA	NA	NA	NA	NA	NA	598	491	476	412	697	517	351	530	533	0	0	570	0	827	1705	659
3135	55.64	789.676		NA	NA	NA	NA	NA	NA	NA	NA	452	627	618	572	772	850	830	540	327	677	140	539	0	516	264	642
11047	217.55	169.053		NA	NA	NA	NA	NA	NA	NA	NA	366	468	442	610	361	353	444	438	350	394	457	423	823	726	986	729
4252	200.91	265.131		NA	NA	NA	NA	NA	NA	NA	NA	1157	679	531	472	393	413	412	412	249	358	564	355	657	883	0	840
4839	251.73	503.156		NA	NA	NA	NA	NA	NA	NA	NA	234	377	799	824	381	604	326	541	452	667	641	532	644	590	576	195
5207	281.07	342.11		NA	NA	NA	NA	NA	NA	NA	NA	284	632	213	409	1278	1306	1236	132	134	762	128	599	171	720	383	0
2324	1046.01	479.371		NA	NA	NA	NA	NA	NA	NA	NA	0	730	844	0	771	1328	0	497	1245	1042	0	1022	0	0	0	909
9041	1013.49	200.142		NA	NA	NA	NA	NA	NA	NA	NA	504	448	572	478	580	469	555	458	417	418	554	615	603	665	672	385
408	207.32	344.124		NA	NA	NA	NA	NA	NA	NA	NA	437	590	274	397	776	627	526	608	439	723	588	567	358	352	620	512
6806	881.78	464.165		NA	NA	NA	NA	NA	NA	NA	NA	0	538	750	578	535	536	587	528	596	562	522	436	265	680	730	555
3834	62.35	157.038		NA	NA	NA	NA	NA	NA	NA	NA	492	489	519	653	592	508	521	715	310	518	398	534	464	435	531	730
1257	614.98	543.08		NA	NA	NA	NA	NA	NA	NA	NA	424	306	766	598	666	888	552	0	183	756	476	1524	324	244	134	568
8080	977.83	760.449		NA	NA	NA	NA	NA	NA	NA	NA	0	0	1859	0	1187	1555	0	1127	0	1197	0	1484	0	0	0	0
9259	1021.5	972.534		NA	NA	NA	NA	NA	NA	NA	NA	1332	989	0	908	0	1135	0	0	830	0	0	682	759	845	0	931
9107	1014.28	338.224		NA	NA	NA	NA	NA	NA	NA	NA	481	487	632	734	481	555	442	628	439	561	421	570	452	504	528	498
7082	908.81	583.403		NA	NA	NA	NA	NA	NA	NA	NA	845	948	853	0	875	942	0	819	1109	0	0	920	0	0	0	1103
6667	866.65	488.299		NA	NA	NA	NA	NA	NA	NA	NA	503	619	570	511	652	699	566	540	398	634	589	523	407	330	405	470
4077	89.84	206.043		NA	NA	NA	NA	NA	NA	NA	NA	184	536	290	514	157	258	636	503	378	291	502	631	862	648	1110	920
7790	962.73	599.42		NA	NA	NA	NA	NA	NA	NA	NA	0	1286	0	0	1144	1224	1088	0	0	836	847	1272	0	0	726	0
6892	889.9	121.074		NA	NA	NA	NA	NA	NA	NA	NA	626	485	539	425	549	564	408	544	397	695	451	469	539	491	642	601
4581	234.63	179.041		NA	NA	NA	NA	NA	NA	NA	NA	512	638	638	359	568	693	343	482	400	550	400	464	462	434	487	996
4743	242.23	172.068		NA	NA	NA	NA	NA	NA	NA	NA	335	637	377	461	467	646	476	367	522	601	520	532	764	680	450	596
2755	52.88	281.897		NA	NA	NA	NA	NA	NA	NA	NA	474	494	430	553	404	305	516	624	472	493	552	623	491	678	605	717
10465	1061.2	488.35		NA	NA	NA	NA	NA	NA	NA	NA	626	451	530	432	624	697	247	621	366	752	451	514	519	602	475	534
6855	887.94	262.228		NA	NA	NA	NA	NA	NA	NA	NA	753	396	417	581	742	737	531	339	441	684	0	561	489	672	373	727
5936	665.52	384.121		NA	NA	NA	NA	NA	NA	NA	NA	259	388	388	554	898	572	1737	696	253	306	624	497	475	386	414	0
7474	940.21	476.358		NA	NA	NA	NA	NA	NA	NA	NA	585	612	704	628	805	877	111	701	826	900	0	837	0	0	0	877
89	54.7	213.832		NA	NA	NA	NA	NA	NA	NA	NA	145	581	637	820	1069	838	500	636	369	707	94	174	650	490	76	677
2907	53.81	857.752		NA	NA	NA	NA	NA	NA	NA	NA	0	901	652	0	689	902	909	701	0	654	447	668	564	392	231	753
3860	62.67	320.074		NA	NA	NA	NA	NA	NA	NA	NA	331	313	428	519	357	227	631	495	429	257	685	732	612	760	962	728
7757	958.35	582.421		NA	NA	NA	NA	NA	NA	NA	NA	1074	674	0	0	1245	724	0	0	1088	912	0	1392	0	166	0	1195
6420	830.78	408.335		NA	NA	NA	NA	NA	NA	NA	NA	513	464	253	676	1565	471	311	599	377	438	339	487	599	502	338	539
8696	1004.02	174.14		NA	NA	NA	NA	NA	NA	NA	NA	531	513	479	543	516	610	534	606	521	474	516	549	642	411	524	503
802	269.75	762.236		NA	NA	NA	NA	NA	NA	NA	NA	1555	576	433	677	863	596	389	171	246	406	1105	249	401	468	338	0
8986	1010.1	200.156		NA	NA	NA	NA	NA	NA	NA	NA	502	553	585	581	648	625	497	428	373	565	455	595	593	562	462	450
304	87.51	524.016		NA	NA	NA	NA	NA	NA	NA	NA	571	753	545	582	438	525	727	472	427	362	395	509	551	592	472	554
10120	1049.74	328.276		NA	NA	NA	NA	NA	NA	NA	NA	475	505	583	531	551	601	531	443	376	584	586	420	621	533	675	461
1067	422.11	351.095		NA	NA	NA	NA	NA	NA	NA	NA	152	715	0	212	0	391	229	653	0	772	558	374	1370	1735	636	679
9379	1025.49	594.515		NA	NA	NA	NA	NA	NA	NA	NA	953	611	0	629	0	668	260	0	863	0	899	634	943	802	515	700
8448	991.76	340.264		NA	NA	NA	NA	NA	NA	NA	NA	985	0	1205	0	1339	740	1045	914	0	0	1193	0	1069	0	0	0
4061	87.46	773.044		NA	NA	NA	NA	NA	NA	NA	NA	790	614	522	665	430	429	809	674	331	251	480	557	528	603	307	510
876	302.87	397.106		NA	NA	NA	NA	NA	NA	NA	NA	1507	471	1150	444	313	280	537	243	134	275	282	765	563	507	225	807
10663	1066.98	584.445		NA	NA	NA	NA	NA	NA	NA	NA	0	0	0	5214	0	0	0	3291	0	0	0	0	0	0	0	0
5864	623.44	748.235		NA	NA	NA	NA	NA	NA	NA	NA	478	776	1231	335	115	411	319	0	446	367	905	838	708	756	627	196
1395	729.98	356.126		NA	NA	NA	NA	NA	NA	NA	NA	371	563	291	667	1013	1412	377	427	239	1209	508	426	278	458	270	0
5356	308.76	439.093		NA	NA	NA	NA	NA	NA	NA	NA	493	500	377	354	375	235	295	455	182	123	489	285	1183	1003	1404	771
8534	996.33	584.424		NA	NA	NA	NA	NA	NA	NA	NA	557	867	484	852	596	994	0	624	719	1366	0	805	0	0	0	667
3867	62.77	103.046		NA	NA	NA	NA	NA	NA	NA	NA	555	545	684	621	367	397	739	546	357	248	441	711	626	858	450	391
6475	837.17	348.229		NA	NA	NA	NA	NA	NA	NA	NA	534	426	663	440	976	1086	230	424	320	1017	314	572	359	367	324	485
10450	1060.84	496.357		NA	NA	NA	NA	NA	NA	NA	NA	488	0	872	544	433	666	420	578	0	651	579	425	955	858	600	468
3774	62.51	313.043		NA	NA	NA	NA	NA	NA	NA	NA	585	548	502	421	0	378	649	537	422	357	576	396	555	814	802	996
2881	55.27	839.691		NA	NA	NA	NA	NA	NA	NA	NA	430	1145	907	776	0	1100	1342	0	0	927	0	0	516	0	436	962
1289	642.26	190.027		NA	NA	NA	NA	NA	NA	NA	NA	653	426	657	107	0	571	506	470	313	787	471	852	813	922	441	556
3690	61.69	231.114		NA	NA	NA	NA	NA	NA	NA	NA	700	789	0	0	822	813	590	735	293	684	407	656	811	751	504	0
8228	984.31	246.232		NA	NA	NA	NA	NA	NA	NA	NA	846	456	941	504	1074	793	476	0	0	561	779	0	681	411	607	426
1043	401.38	190.026		NA	NA	NA	NA	NA	NA	NA	NA	470	364	1446	312	119	577	436	589	409	710	322	640	502	514	561	594
1428	753.14	491.269		NA	NA	NA	NA	NA	NA	NA	NA	0	1356	1283	1178	189	180	499	848	393	753	467	0	258	316	383	463
4103	102.33	256.24		NA	NA	NA	NA	NA	NA	NA	NA	508	3398	846	480	490	0	398	464	1117	0	0	0	0	0	391	475
2482	4.92	256.24		NA	NA	NA	NA	NA	NA	NA	NA	760	797	658	594	578	526	463	420	738	495	525	0	471	510	569	472
4896	255.12	460.123		NA	NA	NA	NA	NA	NA	NA	NA	430	544	629	376	450	423	322	445	321	374	503	386	800	1123	750	700
7198	918.23	188.105		NA	NA	NA	NA	NA	NA	NA	NA	524	446	609	595	874	998	499	485	284	733	401	380	527	489	352	380
4544	232.65	498.135		NA	NA	NA	NA	NA	NA	NA	NA	354	1021	531	344	0	85	0	577	316	169	404	314	1901	1243	772	549
1533	802.9	382.235		NA	NA	NA	NA	NA	NA	NA	NA	475	440	408	410	481	495	510	571	466	665	537	498	663	635	623	708
1741	892.99	460.166		NA	NA	NA	NA	NA	NA	NA	NA	780	408	688	512	389	645	292	296	601	346	572	276	762	1009	440	572
8392	992.38	479.325		NA	NA	NA	NA	NA	NA	NA	NA	395	411	769	505	867	1072	0	334	377	1429	395	510	396	206	440	482
10962	1079.05	460.355		NA	NA	NA	NA	NA	NA	NA	NA	353	291	432	449	533	534	661	356	438	557	813	537	678	869	643	452
2903	53.81	607.785		NA	NA	NA	NA	NA	NA	NA	NA	538	753	497	607	420	609	1001	633	130	616	432	517	327	380	283	855
8688	1003.49	410.354		NA	NA	NA	NA	NA	NA	NA	NA	567	0	0	459	724	498	917	315	245	264	1398	635	424	1053	742	363
9671	1035.56	599.408		NA	NA	NA	NA	NA	NA	NA	NA	488	746	470	491	416	602	551	556	512	589	354	648	264	624	524	772
6279	818.32	108.094		NA	NA	NA	NA	NA	NA	NA	NA	465	506	905	627	399	380	354	674	444	383	706	658	757	481	420	455
5639	386.54	486.153		NA	NA	NA	NA	NA	NA	NA	NA	309	859	892	780	592	690	476	430	598	485	674	352	500	418	255	313
10954	1079.69	616.507		NA	NA	NA	NA	NA	NA	NA	NA	840	711	172	648	988	901	220	909	413	287	596	410	185	375	244	724
4125	131.94	145.053		NA	NA	NA	NA	NA	NA	NA	NA	532	744	632	461	411	702	493	590	378	576	230	371	706	813	0	987
10340	1058.21	128.12		NA	NA	NA	NA	NA	NA	NA	NA	414	390	486	445	956	958	439	557	396	1193	397	426	110	539	443	478
10606	1065.67	670.458		NA	NA	NA	NA	NA	NA	NA	NA	323	410	755	564	711	782	339	338	725	538	453	621	759	768	542	0
2509	46.49	228.987		NA	NA	NA	NA	NA	NA	NA	NA	620	483	678	437	491	416	532	562	690	449	520	534	621	488	443	666
2128	1004.12	131.095		NA	NA	NA	NA	NA	NA	NA	NA	472	531	554	549	797	863	421	559	435	628	235	492	501	465	523	605
2024	977.77	447.184		NA	NA	NA	NA	NA	NA	NA	NA	686	383	1021	442	725	650	440	647	197	570	525	701	475	434	321	419
9964	1045.7	242.202		NA	NA	NA	NA	NA	NA	NA	NA	652	575	497	522	429	480	584	535	454	445	748	413	708	727	445	425
7691	954.73	108.094		NA	NA	NA	NA	NA	NA	NA	NA	535	605	672	518	600	577	483	506	441	534	470	487	428	604	609	570
5911	648.48	317.141		NA	NA	NA	NA	NA	NA	NA	NA	1681	746	926	302	0	0	298	205	186	0	704	223	335	967	1069	998
2241	1028.09	565.456		NA	NA	NA	NA	NA	NA	NA	NA	441	382	452	453	442	503	779	364	408	405	680	428	790	793	948	380
3939	82.88	271.993		NA	NA	NA	NA	NA	NA	NA	NA	561	632	675	502	419	479	520	472	273	404	452	549	642	569	637	862
7525	943.89	437.349		NA	NA	NA	NA	NA	NA	NA	NA	605	535	341	686	994	649	0	673	328	345	597	722	560	563	363	691
3694	60.97	295.126		NA	NA	NA	NA	NA	NA	NA	NA	574	457	968	929	392	512	403	548	338	422	421	439	822	516	260	654
3536	61.89	318.057		NA	NA	NA	NA	NA	NA	NA	NA	0	235	546	601	985	775	0	374	706	754	562	474	612	603	702	732
7945	967.93	701.5		NA	NA	NA	NA	NA	NA	NA	NA	771	961	964	302	305	334	246	544	453	656	643	298	357	763	442	625
5488	337.04	367.099		NA	NA	NA	NA	NA	NA	NA	NA	803	458	285	665	313	451	650	725	268	334	438	858	454	570	741	651
1355	691.61	653.198		NA	NA	NA	NA	NA	NA	NA	NA	334	283	247	739	366	862	1003	350	232	664	469	1137	465	269	541	703
3332	57.48	174.112		NA	NA	NA	NA	NA	NA	NA	NA	483	0	523	494	0	0	640	0	0	0	540	0	1418	1087	2584	896
1621	839.92	488.338		NA	NA	NA	NA	NA	NA	NA	NA	515	743	590	501	600	923	631	486	329	1108	289	541	471	245	327	372
7233	920.79	611.253		NA	NA	NA	NA	NA	NA	NA	NA	609	422	804	417	915	653	240	501	376	609	557	414	463	536	618	540
1826	919.56	554.404		NA	NA	NA	NA	NA	NA	NA	NA	401	505	457	429	731	576	527	524	508	519	436	699	604	584	646	534
5668	410.14	340.131		NA	NA	NA	NA	NA	NA	NA	NA	648	320	506	688	404	424	573	552	436	401	875	531	527	538	625	645
3693	61.44	756.133		NA	NA	NA	NA	NA	NA	NA	NA	547	722	651	723	342	537	1096	632	239	314	348	602	557	622	114	647
3128	55.65	569.739		NA	NA	NA	NA	NA	NA	NA	NA	354	675	619	609	941	838	548	500	0	557	590	447	535	614	190	679
8848	1008.69	624.475		NA	NA	NA	NA	NA	NA	NA	NA	567	606	810	715	556	627	379	464	161	586	533	284	1026	901	0	482
3117	55.84	561.918		NA	NA	NA	NA	NA	NA	NA	NA	479	963	587	401	297	312	720	587	211	300	214	429	577	838	853	930
4795	247.79	268.052		NA	NA	NA	NA	NA	NA	NA	NA	725	530	684	297	1188	1310	182	371	331	1320	245	0	263	401	306	547
4022	87.46	1128.18		NA	NA	NA	NA	NA	NA	NA	NA	1166	858	702	761	228	126	1262	639	0	136	366	659	701	536	0	560
2465	1076.74	375.268		NA	NA	NA	NA	NA	NA	NA	NA	1553	0	1089	0	2002	1299	0	0	1377	0	0	0	0	0	0	1381
10545	1063.46	120.044		NA	NA	NA	NA	NA	NA	NA	NA	608	484	467	542	528	600	566	512	607	692	536	534	509	515	480	521
7469	938.37	840.505		NA	NA	NA	NA	NA	NA	NA	NA	137	1001	308	901	640	201	800	1108	805	0	753	363	645	262	599	197
2471	1078.15	757.215		NA	NA	NA	NA	NA	NA	NA	NA	985	867	466	80	505	377	463	418	286	427	942	943	144	142	918	761
10198	1052.19	180.151		NA	NA	NA	NA	NA	NA	NA	NA	623	488	549	600	449	749	733	496	0	682	604	596	538	692	472	456
9628	1032.77	176.156		NA	NA	NA	NA	NA	NA	NA	NA	531	621	565	602	713	559	504	532	733	525	553	633	522	0	564	581
2614	51.19	443.871		NA	NA	NA	NA	NA	NA	NA	NA	306	358	598	336	479	614	520	496	539	447	327	787	842	692	779	621
1340	684.17	195.009		NA	NA	NA	NA	NA	NA	NA	NA	635	641	608	435	892	1054	290	400	296	1091	366	306	370	415	401	543
3222	55.99	327.966		NA	NA	NA	NA	NA	NA	NA	NA	419	588	465	429	274	335	786	620	405	380	411	583	766	776	606	901
5049	264.62	204.036		NA	NA	NA	NA	NA	NA	NA	NA	274	773	251	567	321	516	398	696	149	708	946	490	702	691	521	741
2311	1044.4	514.475		NA	NA	NA	NA	NA	NA	NA	NA	1305	1217	688	0	423	0	1069	0	320	1929	0	328	0	697	0	775
7004	901.01	598.494		NA	NA	NA	NA	NA	NA	NA	NA	892	685	570	470	0	0	0	661	551	1012	1099	508	923	761	629	0
10142	1052.16	96.0578		NA	NA	NA	NA	NA	NA	NA	NA	568	483	866	403	738	598	608	502	437	576	410	572	511	475	515	499
2606	50.85	370.95		NA	NA	NA	NA	NA	NA	NA	NA	370	471	514	633	650	774	577	445	303	503	493	646	589	680	579	536
5369	313.73	535.242		NA	NA	NA	NA	NA	NA	NA	NA	267	1173	868	611	239	757	165	201	396	874	313	135	1130	1011	487	143
6380	825.74	414.205		NA	NA	NA	NA	NA	NA	NA	NA	445	310	379	378	1989	0	560	393	327	1184	430	498	504	384	480	521
7438	936.81	532.404		NA	NA	NA	NA	NA	NA	NA	NA	605	515	708	690	969	945	0	704	1037	730	0	774	0	0	0	1106
10408	1059.91	478.346		NA	NA	NA	NA	NA	NA	NA	NA	746	334	864	539	543	757	767	471	0	0	893	521	828	901	623	0
8654	1002.3	482.361		NA	NA	NA	NA	NA	NA	NA	NA	439	258	608	426	462	378	628	389	302	507	1143	517	441	1025	837	430
5912	649.5	424.127		NA	NA	NA	NA	NA	NA	NA	NA	468	907	528	622	0	90	559	433	235	0	581	545	930	846	1211	836
1945	955.96	497.422		NA	NA	NA	NA	NA	NA	NA	NA	413	1103	466	411	739	668	363	0	0	549	0	641	818	887	742	991
7290	927.17	292.167		NA	NA	NA	NA	NA	NA	NA	NA	299	362	331	298	1319	1397	313	393	358	1264	449	276	509	429	365	432
4195	183.62	426.2		NA	NA	NA	NA	NA	NA	NA	NA	752	654	435	554	316	511	661	285	207	535	1035	602	605	632	451	563
3078	54.5	123.031		NA	NA	NA	NA	NA	NA	NA	NA	506	482	660	467	461	444	470	354	525	388	529	530	830	1141	451	561
1413	739.28	298.054		NA	NA	NA	NA	NA	NA	NA	NA	514	595	570	520	481	466	700	573	520	507	544	605	593	453	578	580
8835	1008.92	208.073		NA	NA	NA	NA	NA	NA	NA	NA	195	525	2259	810	0	0	714	287	177	0	208	2123	300	262	139	802
10665	1067.25	112.053		NA	NA	NA	NA	NA	NA	NA	NA	595	537	597	492	767	522	515	544	522	526	416	506	510	636	469	652
9394	1026.57	389.305		NA	NA	NA	NA	NA	NA	NA	NA	590	474	585	536	623	653	408	592	517	651	551	523	520	484	554	545
3853	62.57	172.036		NA	NA	NA	NA	NA	NA	NA	NA	482	487	548	598	763	612	643	532	440	644	755	223	527	489	497	571
6312	819.76	292.24		NA	NA	NA	NA	NA	NA	NA	NA	500	444	200	250	330	1027	488	119	585	1201	290	213	900	715	1108	447
8489	993.61	584.432		NA	NA	NA	NA	NA	NA	NA	NA	687	765	673	837	835	787	0	985	551	1107	0	792	0	0	0	799
6243	809.67	232.146		NA	NA	NA	NA	NA	NA	NA	NA	470	295	352	347	1234	1367	355	425	321	1147	491	380	413	398	491	335
9840	1041.63	608.445		NA	NA	NA	NA	NA	NA	NA	NA	707	829	0	808	778	667	296	679	353	628	429	543	482	478	488	658
8135	978.42	92.0627		NA	NA	NA	NA	NA	NA	NA	NA	470	463	537	524	538	599	658	552	406	609	587	466	608	546	522	743
8517	995.8	713.544		NA	NA	NA	NA	NA	NA	NA	NA	1869	0	0	0	2352	0	0	0	0	0	3723	0	885	0	0	0
8240	983.91	232.182		NA	NA	NA	NA	NA	NA	NA	NA	1096	687	645	405	784	197	609	246	470	502	341	690	211	911	190	846
6011	702.48	324.193		NA	NA	NA	NA	NA	NA	NA	NA	288	258	330	345	2290	1259	187	438	200	1142	350	323	319	326	417	365
8372	990.4	120.094		NA	NA	NA	NA	NA	NA	NA	NA	449	567	383	603	421	643	512	513	617	729	477	403	620	588	620	694
7197	918.07	584.421		NA	NA	NA	NA	NA	NA	NA	NA	0	1071	964	796	1032	1024	0	921	1158	0	0	1042	0	0	0	835
7811	961.27	407.281		NA	NA	NA	NA	NA	NA	NA	NA	425	1225	536	560	679	1110	511	489	0	1071	562	449	322	207	337	361
8325	988.8	754.536		NA	NA	NA	NA	NA	NA	NA	NA	785	1293	502	322	177	487	465	1063	854	806	251	279	170	664	367	369
8079	977.52	649.397		NA	NA	NA	NA	NA	NA	NA	NA	392	408	535	408	672	818	379	784	234	950	510	757	512	491	606	405
6717	873.23	700.352		NA	NA	NA	NA	NA	NA	NA	NA	545	569	639	557	826	803	307	408	404	723	518	464	600	474	469	563
7589	947.28	190.136		NA	NA	NA	NA	NA	NA	NA	NA	498	619	639	570	597	497	544	610	497	486	538	461	646	599	578	496
9969	1045.81	104.063		NA	NA	NA	NA	NA	NA	NA	NA	781	1125	422	566	388	530	391	676	337	458	522	426	665	550	474	567
8074	975.75	585.427		NA	NA	NA	NA	NA	NA	NA	NA	645	640	623	692	665	883	0	527	654	1074	0	818	0	410	353	896
5085	267.88	524.153		NA	NA	NA	NA	NA	NA	NA	NA	364	539	729	603	919	642	713	345	296	439	584	499	810	696	224	478
9444	1029.06	459.282		NA	NA	NA	NA	NA	NA	NA	NA	1137	0	0	555	870	1088	497	1171	0	0	624	1167	321	649	0	801
3076	54.41	201.023		NA	NA	NA	NA	NA	NA	NA	NA	671	544	826	466	536	393	693	475	246	194	498	514	822	822	410	774
9067	1014.51	422.245		NA	NA	NA	NA	NA	NA	NA	NA	795	769	519	0	513	0	806	691	673	640	538	562	484	736	628	543
470	218.22	738.285		NA	NA	NA	NA	NA	NA	NA	NA	371	596	446	1013	302	555	791	334	0	317	383	461	955	878	829	667
3183	55.54	637.726		NA	NA	NA	NA	NA	NA	NA	NA	428	784	0	636	926	958	675	707	268	823	239	603	678	0	544	637
2765	53.4	785.754		NA	NA	NA	NA	NA	NA	NA	NA	0	1023	778	718	508	1022	664	511	0	1006	715	637	0	0	561	763
9902	1043.89	608.289		NA	NA	NA	NA	NA	NA	NA	NA	1101	820	0	821	408	550	227	1145	1061	903	0	1132	228	284	233	0
8596	998.74	394.323		NA	NA	NA	NA	NA	NA	NA	NA	0	0	374	480	376	495	354	711	798	0	876	1494	1155	1285	516	0
8266	985.89	466.365		NA	NA	NA	NA	NA	NA	NA	NA	468	314	462	374	513	325	947	337	326	345	1631	441	255	745	1127	307
10318	1056.93	399.353		NA	NA	NA	NA	NA	NA	NA	NA	234	331	308	350	389	0	1822	94	146	219	2728	270	0	999	781	249
10469	1061.38	392.308		NA	NA	NA	NA	NA	NA	NA	NA	421	525	603	685	407	911	512	699	403	516	984	0	530	490	647	590
9864	1042.25	382.323		NA	NA	NA	NA	NA	NA	NA	NA	551	508	487	758	476	607	507	656	594	478	575	571	452	719	552	440
5118	270.7	299.08		NA	NA	NA	NA	NA	NA	NA	NA	360	626	786	514	373	259	517	553	363	261	589	896	749	1017	575	496
9008	1010.59	134.094		NA	NA	NA	NA	NA	NA	NA	NA	523	553	473	555	381	825	575	545	411	764	620	493	532	458	473	757
4920	256.83	162.054		NA	NA	NA	NA	NA	NA	NA	NA	1351	233	215	1167	0	191	211	0	98	173	1250	207	1370	1176	1099	197
3234	56.55	347.927		NA	NA	NA	NA	NA	NA	NA	NA	434	890	427	494	342	523	914	509	144	386	0	537	695	720	825	1099
6476	836.83	408.335		NA	NA	NA	NA	NA	NA	NA	NA	632	472	255	729	1967	504	235	581	188	348	429	430	474	546	474	679
4558	232.32	384.106		NA	NA	NA	NA	NA	NA	NA	NA	417	469	673	480	445	674	612	370	320	630	739	640	729	452	730	569
10585	1065.07	148.11		NA	NA	NA	NA	NA	NA	NA	NA	554	611	672	716	668	735	0	582	0	740	766	640	824	0	752	695
10855	1075.39	472.317		NA	NA	NA	NA	NA	NA	NA	NA	594	686	650	565	452	0	587	799	637	663	659	635	0	730	545	754
8105	976.08	558.444		NA	NA	NA	NA	NA	NA	NA	NA	475	886	1085	864	323	535	281	770	386	510	199	0	1035	1168	0	440
3965	87.07	331.054		NA	NA	NA	NA	NA	NA	NA	NA	0	0	0	896	559	907	0	929	858	871	0	0	1675	0	0	2263
4374	217.96	226.072		NA	NA	NA	NA	NA	NA	NA	NA	324	617	550	592	539	356	593	424	545	476	512	652	542	532	972	736
7903	966.38	342.219		NA	NA	NA	NA	NA	NA	NA	NA	593	548	490	408	378	330	1146	505	541	603	504	479	658	750	528	504
6024	710.35	236.14		NA	NA	NA	NA	NA	NA	NA	NA	537	385	380	421	1471	1069	315	529	436	1026	377	395	356	383	482	403
8273	986.04	304.24		NA	NA	NA	NA	NA	NA	NA	NA	616	655	736	496	665	504	524	496	390	698	737	512	425	564	430	517
2805	53.74	377.831		NA	NA	NA	NA	NA	NA	NA	NA	478	855	586	538	498	708	695	390	130	757	595	538	511	602	423	677
2244	1029.1	698.482		NA	NA	NA	NA	NA	NA	NA	NA	782	660	665	657	604	606	350	708	623	763	327	631	313	311	300	683
600	235.21	828.232		NA	NA	NA	NA	NA	NA	NA	NA	0	811	652	634	461	504	516	0	562	429	694	782	798	722	623	796
2221	1023.07	539.446		NA	NA	NA	NA	NA	NA	NA	NA	1055	0	0	0	1135	562	1163	473	0	1036	1284	746	852	0	0	678
5604	376.87	250.178		NA	NA	NA	NA	NA	NA	NA	NA	600	584	571	557	645	547	541	456	526	477	547	654	518	705	523	535
2909	53.84	491.823		NA	NA	NA	NA	NA	NA	NA	NA	451	848	515	542	455	852	718	338	82	760	530	418	602	601	581	695
9551	1029.37	414.313		NA	NA	NA	NA	NA	NA	NA	NA	497	510	544	574	470	522	668	453	394	495	544	546	872	673	733	496
10498	1062.81	698.518		NA	NA	NA	NA	NA	NA	NA	NA	529	507	499	538	1002	899	503	439	541	849	526	473	235	436	557	459
6942	895.27	424.282		NA	NA	NA	NA	NA	NA	NA	NA	435	563	633	708	707	928	687	735	370	666	374	793	329	294	292	478
5293	299.15	295.055		NA	NA	NA	NA	NA	NA	NA	NA	459	580	277	804	843	1490	547	332	253	1161	530	470	376	278	185	407
3255	58.34	854.081		NA	NA	NA	NA	NA	NA	NA	NA	489	628	708	640	523	737	1286	559	209	491	477	627	557	374	0	687
1224	585.14	184.064		NA	NA	NA	NA	NA	NA	NA	NA	925	473	1036	572	479	595	430	102	116	564	445	1085	798	515	197	661
1110	454.38	402.132		NA	NA	NA	NA	NA	NA	NA	NA	494	402	770	354	456	419	409	506	376	433	590	380	740	715	584	1366
6406	827.15	504.247		NA	NA	NA	NA	NA	NA	NA	NA	0	1264	1196	1997	138	1507	0	1271	173	1050	0	114	0	0	149	135
1849	924.96	716.564		NA	NA	NA	NA	NA	NA	NA	NA	625	490	0	1197	755	331	321	246	570	715	901	447	556	492	588	763
8770	1006.93	712.495		NA	NA	NA	NA	NA	NA	NA	NA	877	589	606	581	781	711	0	675	554	491	611	0	686	415	652	773
3310	57.28	164.006		NA	NA	NA	NA	NA	NA	NA	NA	534	448	972	826	450	531	364	630	463	402	517	617	546	536	395	775
5148	272.3	353.093		NA	NA	NA	NA	NA	NA	NA	NA	429	590	462	261	372	412	289	551	273	0	1164	0	982	941	1630	654
1805	914.54	587.273		NA	NA	NA	NA	NA	NA	NA	NA	808	784	683	0	691	732	842	633	262	706	706	0	646	540	417	565
3735	62.37	233.126		NA	NA	NA	NA	NA	NA	NA	NA	819	676	927	732	500	486	385	700	261	510	357	366	444	427	313	1117
1998	971.96	325.262		NA	NA	NA	NA	NA	NA	NA	NA	402	348	483	366	1430	1503	0	471	0	1545	461	358	414	383	425	431
10487	1061.88	687.493		NA	NA	NA	NA	NA	NA	NA	NA	409	782	788	732	1067	1015	671	683	0	902	0	0	694	894	385	0
769	261.65	441.067		NA	NA	NA	NA	NA	NA	NA	NA	775	610	342	321	1213	1222	305	660	265	1338	250	284	320	426	296	398
6592	856.25	310.214		NA	NA	NA	NA	NA	NA	NA	NA	576	451	627	433	750	856	488	498	426	856	481	494	561	485	520	530
8845	1009.25	488.312		NA	NA	NA	NA	NA	NA	NA	NA	632	537	625	494	475	569	576	545	688	666	644	555	525	544	334	624
2499	30.31	256.24		NA	NA	NA	NA	NA	NA	NA	NA	580	581	532	470	666	0	632	1402	486	846	504	459	437	501	513	424
911	318.17	351.035		NA	NA	NA	NA	NA	NA	NA	NA	313	333	197	435	1047	2118	316	445	219	1828	400	441	102	128	359	355
1677	866.31	329.121		NA	NA	NA	NA	NA	NA	NA	NA	513	526	497	433	1082	1135	413	476	321	880	399	581	577	417	418	370
1600	834.55	425.254		NA	NA	NA	NA	NA	NA	NA	NA	593	625	784	1022	382	607	586	501	212	448	600	930	478	483	289	499
5728	449	188.105		NA	NA	NA	NA	NA	NA	NA	NA	567	386	372	369	1253	1244	354	355	369	1103	464	396	406	486	537	381
6598	856.67	330.181		NA	NA	NA	NA	NA	NA	NA	NA	289	398	532	385	999	1404	320	638	334	1213	338	483	380	355	564	411
510	223.85	347.151		NA	NA	NA	NA	NA	NA	NA	NA	745	854	578	1183	664	897	586	333	197	762	445	396	400	317	190	498
4926	257.63	409.101		NA	NA	NA	NA	NA	NA	NA	NA	661	458	806	541	510	509	215	258	313	486	803	341	1171	1239	262	473
3832	62.32	180.046		NA	NA	NA	NA	NA	NA	NA	NA	0	531	848	605	684	605	639	651	425	0	739	851	512	527	733	702
4159	172.23	284.271		NA	NA	NA	NA	NA	NA	NA	NA	1139	670	466	1144	520	913	427	405	422	1021	0	0	0	742	790	394
3986	87.09	499.094		NA	NA	NA	NA	NA	NA	NA	NA	552	558	442	510	383	525	556	375	467	613	570	486	581	662	901	873
4941	259.09	121.074		NA	NA	NA	NA	NA	NA	NA	NA	466	523	621	573	527	514	697	779	480	496	558	634	525	569	545	552
7281	924.47	834.535		NA	NA	NA	NA	NA	NA	NA	NA	0	0	708	949	965	555	633	753	778	697	561	718	790	603	0	352
1504	787.58	438.192		NA	NA	NA	NA	NA	NA	NA	NA	505	562	662	630	810	495	599	547	512	570	504	402	655	583	560	469
378	188.67	268.058		NA	NA	NA	NA	NA	NA	NA	NA	161	65	203	81	1741	496	0	0	397	76	133	0	2507	2177	597	432
7724	955.79	694.456		NA	NA	NA	NA	NA	NA	NA	NA	471	575	755	0	408	630	584	883	0	481	843	830	637	746	625	604
8035	975	176.048		NA	NA	NA	NA	NA	NA	NA	NA	600	589	634	766	657	603	618	446	354	523	503	708	506	751	471	349
3401	58.09	548.123		NA	NA	NA	NA	NA	NA	NA	NA	354	789	414	471	277	349	1150	392	159	299	192	583	740	838	1050	1024
9140	1015.47	400.277		NA	NA	NA	NA	NA	NA	NA	NA	596	605	730	698	577	594	482	506	543	530	504	677	511	518	479	532
6701	868.62	604.269		NA	NA	NA	NA	NA	NA	NA	NA	2746	964	761	1244	95	170	0	1284	193	859	0	556	0	0	0	211
5871	628.44	318.136		NA	NA	NA	NA	NA	NA	NA	NA	665	485	599	615	697	688	429	244	545	814	526	408	443	598	462	866
7372	934.51	211.157		NA	NA	NA	NA	NA	NA	NA	NA	433	545	781	503	697	740	533	408	325	585	564	516	736	555	540	624
9287	1020.47	670.461		NA	NA	NA	NA	NA	NA	NA	NA	487	625	532	621	624	400	421	314	674	657	559	633	533	722	655	631
6819	881.7	575.253		NA	NA	NA	NA	NA	NA	NA	NA	695	696	534	692	503	746	741	370	409	674	640	718	447	391	419	413
6198	787.56	585.216		NA	NA	NA	NA	NA	NA	NA	NA	594	633	459	537	1131	559	501	446	502	415	421	511	764	539	541	541
9963	1046.48	310.235		NA	NA	NA	NA	NA	NA	NA	NA	0	798	0	582	802	1030	732	520	496	532	0	657	1030	615	783	519
1175	531.86	173.048		NA	NA	NA	NA	NA	NA	NA	NA	542	598	595	439	1048	975	330	280	341	964	461	284	630	506	405	706
6510	842.23	571.236		NA	NA	NA	NA	NA	NA	NA	NA	638	644	692	763	493	446	581	602	328	469	622	668	555	695	463	445
1655	859.2	1394.72		NA	NA	NA	NA	NA	NA	NA	NA	244	214	0	296	1600	1593	0	234	363	742	607	643	430	219	1517	403
866	300.19	298.105		NA	NA	NA	NA	NA	NA	NA	NA	566	629	552	453	507	457	450	1235	213	323	1020	845	382	322	622	530
10623	1067.6	385.319		NA	NA	NA	NA	NA	NA	NA	NA	1379	550	1049	383	1550	930	0	629	531	463	359	182	0	560	193	349
4135	153.96	256.24		NA	NA	NA	NA	NA	NA	NA	NA	648	2582	450	701	0	572	409	965	0	422	471	428	436	588	0	441
4315	212.25	462.047		NA	NA	NA	NA	NA	NA	NA	NA	378	617	487	340	320	631	248	326	441	571	637	375	1498	1459	526	260
5084	267.14	462.067		NA	NA	NA	NA	NA	NA	NA	NA	351	384	516	340	338	341	296	415	170	232	743	313	1244	1314	1033	1093
8114	976.73	582.42		NA	NA	NA	NA	NA	NA	NA	NA	0	0	819	664	1244	938	0	650	1114	874	0	1440	0	0	0	1382
8099	975.88	694.456		NA	NA	NA	NA	NA	NA	NA	NA	544	550	691	396	368	616	609	825	337	603	768	873	698	693	0	567
7635	953.13	94.0786		NA	NA	NA	NA	NA	NA	NA	NA	655	569	586	480	750	633	618	545	465	771	455	513	488	623	484	511
10233	1053.65	698.518		NA	NA	NA	NA	NA	NA	NA	NA	551	684	500	731	678	637	499	553	651	672	485	582	417	518	382	607
9070	1012.52	422.341		NA	NA	NA	NA	NA	NA	NA	NA	424	1253	424	470	0	0	534	570	1229	647	486	464	779	0	918	951
7122	914.45	730.504		NA	NA	NA	NA	NA	NA	NA	NA	0	867	0	599	0	616	778	735	691	1124	0	562	493	900	945	842
7103	910.17	598.495		NA	NA	NA	NA	NA	NA	NA	NA	914	728	633	0	0	0	555	720	643	1101	1144	0	1232	760	722	0
1873	933.78	121.074		NA	NA	NA	NA	NA	NA	NA	NA	727	620	541	600	526	630	589	671	487	681	507	467	346	632	556	575
7649	953.54	349.261		NA	NA	NA	NA	NA	NA	NA	NA	740	2256	350	308	810	1510	211	274	169	1466	0	158	233	240	211	222
9479	1028.5	884.547		NA	NA	NA	NA	NA	NA	NA	NA	788	1788	840	1134	424	381	584	1083	769	200	0	266	294	0	225	383
5318	304.45	443.194		NA	NA	NA	NA	NA	NA	NA	NA	109	2413	712	1035	339	791	420	143	244	673	527	214	496	396	140	516
8121	978.86	274.193		NA	NA	NA	NA	NA	NA	NA	NA	574	541	766	378	681	752	431	512	503	625	622	467	658	550	516	602
8449	991.79	884.546		NA	NA	NA	NA	NA	NA	NA	NA	413	1435	476	755	489	347	607	702	892	210	557	360	431	517	269	724
5772	509.54	406.11		NA	NA	NA	NA	NA	NA	NA	NA	574	596	371	732	892	1234	433	522	356	834	514	676	307	280	337	530
147	59.32	1390.45		NA	NA	NA	NA	NA	NA	NA	NA	639	534	865	0	282	444	1393	1127	0	0	0	1322	1139	1059	393	0
2107	999.27	537.512		NA	NA	NA	NA	NA	NA	NA	NA	524	580	783	736	633	961	0	1115	405	390	1616	262	0	0	584	609
1056	410.72	540.162		NA	NA	NA	NA	NA	NA	NA	NA	645	409	661	678	808	778	329	489	362	601	580	364	780	937	403	381
2318	1045.21	584.88		NA	NA	NA	NA	NA	NA	NA	NA	817	830	813	720	957	896	0	583	921	826	0	985	0	0	0	866
381	190.4	448.217		NA	NA	NA	NA	NA	NA	NA	NA	133	862	607	750	172	292	722	490	327	192	1154	740	1111	721	691	258
4190	182.96	168.042		NA	NA	NA	NA	NA	NA	NA	NA	870	281	594	633	478	517	931	541	113	459	572	805	605	439	1057	334
3561	60.38	131.059		NA	NA	NA	NA	NA	NA	NA	NA	651	811	602	500	571	572	699	526	365	601	575	596	451	601	550	561
836	279.34	206.094		NA	NA	NA	NA	NA	NA	NA	NA	365	453	931	424	419	488	339	1206	324	313	825	320	568	557	409	1293
3859	64.26	251.965		NA	NA	NA	NA	NA	NA	NA	NA	552	623	86	453	846	632	437	435	835	686	555	521	432	673	877	596
1291	645.73	396.157		NA	NA	NA	NA	NA	NA	NA	NA	455	391	708	748	481	748	650	668	493	631	529	519	385	398	757	679
248	62.32	255.122		NA	NA	NA	NA	NA	NA	NA	NA	590	562	698	453	772	495	692	536	319	279	427	468	1036	761	574	580
4914	256.55	426.11		NA	NA	NA	NA	NA	NA	NA	NA	666	664	1211	495	166	493	844	437	404	449	661	605	775	518	352	505
5533	350.39	466.151		NA	NA	NA	NA	NA	NA	NA	NA	804	1024	483	509	306	483	834	382	355	496	626	454	637	534	474	845
3318	57.38	379.019		NA	NA	NA	NA	NA	NA	NA	NA	371	721	410	234	178	251	802	527	349	0	419	412	926	1159	1489	1000
2438	1067.98	740.519		NA	NA	NA	NA	NA	NA	NA	NA	803	1136	393	238	211	0	689	822	627	1174	274	274	232	1347	414	617
3845	62.49	103.993		NA	NA	NA	NA	NA	NA	NA	NA	498	547	520	559	888	945	503	443	330	1080	579	539	452	466	454	454
9346	1023.13	634.406		NA	NA	NA	NA	NA	NA	NA	NA	415	596	560	548	573	683	583	592	445	677	668	600	583	603	612	520
558	228.52	465.089		NA	NA	NA	NA	NA	NA	NA	NA	473	543	873	517	159	568	428	507	181	634	696	750	661	421	1097	752
10974	1079.23	92.0628		NA	NA	NA	NA	NA	NA	NA	NA	730	584	761	507	698	569	388	537	619	461	518	719	478	493	506	694
4700	239.67	295.069		NA	NA	NA	NA	NA	NA	NA	NA	516	561	1060	190	0	483	430	831	356	710	649	862	846	697	467	605
10667	1067.48	99.0688		NA	NA	NA	NA	NA	NA	NA	NA	660	651	624	574	898	651	506	492	579	501	461	463	501	599	469	636
6032	714.28	335.209		NA	NA	NA	NA	NA	NA	NA	NA	561	290	210	278	790	1686	211	266	267	1824	518	525	503	755	167	415
997	362.51	234.046		NA	NA	NA	NA	NA	NA	NA	NA	852	541	345	712	173	375	842	715	343	516	418	1027	636	663	466	644
8508	996.65	692.443		NA	NA	NA	NA	NA	NA	NA	NA	932	0	502	630	1061	629	580	542	506	844	710	1528	0	0	465	345
9803	1039.73	583.395		NA	NA	NA	NA	NA	NA	NA	NA	0	0	0	856	0	654	1138	698	0	784	759	772	991	997	1064	561
8739	1005.68	395.361		NA	NA	NA	NA	NA	NA	NA	NA	760	601	651	449	0	0	775	576	643	594	903	527	561	878	781	579
1023	385.68	377.018		NA	NA	NA	NA	NA	NA	NA	NA	1077	516	670	910	290	142	741	686	611	0	1029	751	605	556	216	484
3818	62.22	141.079		NA	NA	NA	NA	NA	NA	NA	NA	589	631	625	693	609	617	485	421	237	592	800	466	658	615	637	610
6679	865.59	786.462		NA	NA	NA	NA	NA	NA	NA	NA	145	543	75	727	0	521	858	765	612	828	365	673	510	853	983	831
5088	269.72	387.152		NA	NA	NA	NA	NA	NA	NA	NA	0	834	701	866	1150	774	570	423	418	627	880	378	591	563	153	362
3087	54.65	139.004		NA	NA	NA	NA	NA	NA	NA	NA	608	504	769	515	597	388	918	430	285	258	484	497	1006	847	315	869
6732	874.1	834.535		NA	NA	NA	NA	NA	NA	NA	NA	576	455	719	801	855	552	777	798	723	662	509	648	0	666	205	347
9899	1043.71	230.167		NA	NA	NA	NA	NA	NA	NA	NA	833	860	823	774	837	806	0	758	790	789	215	888	0	0	0	922
9129	1014.63	729.531		NA	NA	NA	NA	NA	NA	NA	NA	538	833	0	0	451	489	1037	508	417	793	531	1030	742	612	767	554
2490	18.35	256.24		NA	NA	NA	NA	NA	NA	NA	NA	702	1169	634	561	540	491	561	582	798	510	538	482	0	670	604	462
5283	295.67	353.093		NA	NA	NA	NA	NA	NA	NA	NA	670	632	322	440	301	347	197	557	248	146	973	253	1325	1092	1274	528
1843	923.12	716.396		NA	NA	NA	NA	NA	NA	NA	NA	567	703	542	497	557	776	590	618	601	513	539	694	556	416	581	559
7399	934.41	744.492		NA	NA	NA	NA	NA	NA	NA	NA	613	885	565	1092	0	909	596	0	780	782	709	766	0	364	503	746
3574	60.63	235.142		NA	NA	NA	NA	NA	NA	NA	NA	798	503	534	390	624	832	349	394	479	785	348	376	636	649	1113	500
5261	292.77	340.13		NA	NA	NA	NA	NA	NA	NA	NA	567	734	704	661	632	530	678	493	482	438	428	363	880	543	548	637
6652	864.34	392.233		NA	NA	NA	NA	NA	NA	NA	NA	299	304	281	1200	979	295	1422	437	0	546	1018	1565	395	400	0	178
6720	873.28	731.295		NA	NA	NA	NA	NA	NA	NA	NA	477	418	754	549	838	1125	259	523	443	787	633	497	522	374	493	628
6194	787.56	642.285		NA	NA	NA	NA	NA	NA	NA	NA	608	511	790	517	1268	597	440	592	366	407	665	504	508	542	505	500
2170	1009.97	560.481		NA	NA	NA	NA	NA	NA	NA	NA	1032	938	579	189	418	0	1105	148	382	1733	0	372	252	1031	145	997
4705	239.86	358.14		NA	NA	NA	NA	NA	NA	NA	NA	662	472	744	820	438	415	697	579	603	352	654	521	536	596	495	739
3430	58.5	105.025		NA	NA	NA	NA	NA	NA	NA	NA	417	655	914	523	454	457	593	734	393	384	809	488	881	619	486	518
10047	1047.87	566.367		NA	NA	NA	NA	NA	NA	NA	NA	0	871	974	907	1049	885	531	941	0	760	0	983	0	0	560	875
1616	838.73	610.209		NA	NA	NA	NA	NA	NA	NA	NA	0	939	1784	1930	0	1398	0	2015	159	952	0	0	0	0	0	163
7063	907.54	308.197		NA	NA	NA	NA	NA	NA	NA	NA	512	508	438	615	630	701	593	678	474	729	549	619	570	580	524	621
9163	1016.19	582.419		NA	NA	NA	NA	NA	NA	NA	NA	984	737	922	0	934	1001	0	816	921	1159	0	1097	0	0	777	0
3246	56.69	296.96		NA	NA	NA	NA	NA	NA	NA	NA	555	695	487	561	426	748	886	664	464	668	339	697	424	367	721	646
10449	1060.81	711.491		NA	NA	NA	NA	NA	NA	NA	NA	668	551	447	260	0	600	465	548	582	1171	706	351	937	632	774	668
9061	1012.13	500.371		NA	NA	NA	NA	NA	NA	NA	NA	359	343	193	590	1453	1024	376	577	334	1008	388	457	695	567	568	434
1427	753.03	345.111		NA	NA	NA	NA	NA	NA	NA	NA	459	674	429	609	968	1849	414	391	269	1355	412	305	302	302	135	493
10995	1078.69	121.075		NA	NA	NA	NA	NA	NA	NA	NA	759	477	869	443	498	539	508	517	590	440	508	467	570	901	685	613
2085	992.75	215.021		NA	NA	NA	NA	NA	NA	NA	NA	456	1020	183	832	354	524	596	691	730	690	390	359	508	575	727	751
2460	1076.03	632.538		NA	NA	NA	NA	NA	NA	NA	NA	0	792	1263	0	1548	1196	0	0	0	0	160	1213	0	1208	1354	653
5579	364.21	634.378		NA	NA	NA	NA	NA	NA	NA	NA	535	590	614	515	655	630	486	814	416	544	626	630	595	559	565	614
9128	1014.58	716.519		NA	NA	NA	NA	NA	NA	NA	NA	370	295	480	574	404	630	1085	683	705	1106	585	1155	153	185	796	189
3508	59.27	791.192		NA	NA	NA	NA	NA	NA	NA	NA	364	835	434	182	204	1209	244	581	409	1512	207	205	416	509	1117	969
325	106.46	186.047		NA	NA	NA	NA	NA	NA	NA	NA	904	696	877	569	765	1082	557	327	265	1054	363	228	599	560	177	383
3730	62.65	299.118		NA	NA	NA	NA	NA	NA	NA	NA	538	177	765	502	550	629	624	273	171	583	863	664	786	803	768	710
9936	1044.66	599.46		NA	NA	NA	NA	NA	NA	NA	NA	394	446	495	0	571	0	1070	511	426	454	1091	373	994	1071	1032	482
5450	326.44	208.073		NA	NA	NA	NA	NA	NA	NA	NA	857	375	236	1067	693	506	858	481	248	327	960	838	461	590	528	386
8440	991.78	121.074		NA	NA	NA	NA	NA	NA	NA	NA	835	468	791	419	897	587	636	454	452	405	808	593	583	583	433	469
8987	1010.1	751.516		NA	NA	NA	NA	NA	NA	NA	NA	616	1109	188	218	764	1267	298	986	636	287	278	329	470	341	801	826
6458	835.07	236.214		NA	NA	NA	NA	NA	NA	NA	NA	423	343	643	563	934	847	245	495	487	610	814	813	467	508	808	419
10977	1079.37	148.125		NA	NA	NA	NA	NA	NA	NA	NA	689	601	780	612	845	641	218	515	737	338	473	634	530	597	601	619
6769	878.22	609.238		NA	NA	NA	NA	NA	NA	NA	NA	449	403	946	0	932	781	280	0	427	624	746	644	939	740	923	606
7484	939.1	409.428		NA	NA	NA	NA	NA	NA	NA	NA	2664	729	1411	542	752	532	0	0	956	0	480	0	0	0	1375	0
1219	577.59	175.064		NA	NA	NA	NA	NA	NA	NA	NA	380	935	197	452	199	448	303	907	68	601	799	492	1216	1218	521	708
1165	508.61	579.196		NA	NA	NA	NA	NA	NA	NA	NA	709	293	1204	219	0	421	353	218	328	420	1258	1174	828	659	831	535
3828	63.44	234.038		NA	NA	NA	NA	NA	NA	NA	NA	524	637	601	680	347	474	458	463	501	319	689	572	803	677	812	894
10960	1079.13	120.094		NA	NA	NA	NA	NA	NA	NA	NA	631	694	799	588	696	681	0	478	818	566	514	535	473	617	547	817
7732	957.77	352.154		NA	NA	NA	NA	NA	NA	NA	NA	555	484	485	413	1153	1202	693	283	315	1331	435	194	346	381	529	657
10925	1078.78	241.168		NA	NA	NA	NA	NA	NA	NA	NA	791	685	774	696	762	778	369	550	580	478	588	402	483	638	427	456
5441	325.93	566.2		NA	NA	NA	NA	NA	NA	NA	NA	1360	248	56	1412	706	350	965	305	84	164	1321	1017	470	453	351	197
6563	848.96	786.461		NA	NA	NA	NA	NA	NA	NA	NA	0	625	192	699	171	531	1033	827	739	905	0	0	489	1207	1264	782
7027	903.11	386.246		NA	NA	NA	NA	NA	NA	NA	NA	613	518	1133	916	757	812	409	492	371	627	434	588	449	374	203	772
878	302.93	188.041		NA	NA	NA	NA	NA	NA	NA	NA	914	601	866	495	424	525	592	291	340	366	525	812	710	667	386	955
2458	1074.79	556.171		NA	NA	NA	NA	NA	NA	NA	NA	986	0	0	0	0	0	0	1139	0	957	1065	1053	1062	941	1094	1180
6153	776	582.248		NA	NA	NA	NA	NA	NA	NA	NA	518	769	708	705	342	460	593	392	268	302	529	768	729	683	711	1003
7766	959.81	260.887		NA	NA	NA	NA	NA	NA	NA	NA	787	650	582	0	726	560	750	453	664	468	600	556	702	599	679	708
5251	289.12	354.11		NA	NA	NA	NA	NA	NA	NA	NA	232	768	530	614	159	727	1033	786	366	941	271	408	702	489	419	1040
4128	139.93	302.1		NA	NA	NA	NA	NA	NA	NA	NA	401	552	819	432	611	538	551	1420	338	442	743	498	449	426	436	829
2548	50.92	311.913		NA	NA	NA	NA	NA	NA	NA	NA	551	604	587	539	634	608	546	550	84	420	534	652	815	730	772	864
8497	994.55	713.501		NA	NA	NA	NA	NA	NA	NA	NA	1180	0	0	554	969	0	0	1048	0	475	0	948	1523	991	1802	0
10437	1060.38	368.328		NA	NA	NA	NA	NA	NA	NA	NA	547	329	563	0	751	556	692	438	246	585	816	556	759	1186	877	593
10484	1061.78	715.52		NA	NA	NA	NA	NA	NA	NA	NA	1006	566	681	0	0	1100	1090	0	550	1308	424	1011	733	0	1027	0
67	52.78	761.812		NA	NA	NA	NA	NA	NA	NA	NA	560	510	670	762	854	274	114	624	344	652	635	666	930	195	875	832
8252	984.61	528.38		NA	NA	NA	NA	NA	NA	NA	NA	176	1108	0	727	0	747	699	691	1038	719	255	0	754	826	708	1054
8217	984.62	518.347		NA	NA	NA	NA	NA	NA	NA	NA	584	372	1349	475	955	766	293	511	397	882	606	532	479	440	309	552
5542	352.42	512.19		NA	NA	NA	NA	NA	NA	NA	NA	633	1051	600	448	317	370	358	389	150	293	1257	1279	924	734	383	318
7163	915.19	240.186		NA	NA	NA	NA	NA	NA	NA	NA	613	585	973	838	1247	1077	488	548	0	911	0	479	474	561	0	713
4130	139.92	284.271		NA	NA	NA	NA	NA	NA	NA	NA	761	601	481	731	470	458	612	511	1351	729	453	421	374	588	572	396
2826	53.78	581.793		NA	NA	NA	NA	NA	NA	NA	NA	712	841	599	609	499	804	800	400	0	628	388	515	555	704	532	926
3115	56.19	477.956		NA	NA	NA	NA	NA	NA	NA	NA	489	712	575	465	276	347	503	490	488	349	249	709	916	1015	1066	887
10552	1063.83	310.303		NA	NA	NA	NA	NA	NA	NA	NA	504	618	980	1070	652	807	0	1168	0	855	0	632	0	687	807	756
1366	701.59	191.058		NA	NA	NA	NA	NA	NA	NA	NA	250	1090	203	428	254	1227	212	516	164	1606	551	344	650	765	581	698
9078	1014.78	339.313		NA	NA	NA	NA	NA	NA	NA	NA	696	481	720	595	548	487	538	632	504	538	620	755	546	623	725	533
9322	1021.77	434.243		NA	NA	NA	NA	NA	NA	NA	NA	621	572	889	881	377	564	919	389	318	635	569	518	598	618	556	518
5375	315.33	489.237		NA	NA	NA	NA	NA	NA	NA	NA	257	1938	2120	66	406	198	0	1025	194	0	390	289	1176	1098	193	193
1662	862.04	306.146		NA	NA	NA	NA	NA	NA	NA	NA	342	111	604	785	595	1044	217	1059	653	1122	457	395	554	416	881	325
3089	54.7	793.801		NA	NA	NA	NA	NA	NA	NA	NA	653	0	750	770	125	672	137	0	0	783	852	806	1114	1029	1343	527
111	56.79	206.199		NA	NA	NA	NA	NA	NA	NA	NA	785	927	597	477	513	733	815	490	78	602	822	712	479	618	419	496
6535	845.48	348.229		NA	NA	NA	NA	NA	NA	NA	NA	441	464	385	435	1139	1658	256	619	301	1499	310	420	462	386	463	328
58	52.4	1473.63		NA	NA	NA	NA	NA	NA	NA	NA	621	208	599	758	636	599	739	633	310	721	0	788	778	729	752	696
1850	925.05	438.35		NA	NA	NA	NA	NA	NA	NA	NA	433	349	458	498	1272	702	670	441	355	628	455	373	870	776	823	472
6233	804.61	248.177		NA	NA	NA	NA	NA	NA	NA	NA	532	600	467	673	548	550	657	434	579	550	646	743	480	698	686	734
2543	49.94	113.98		NA	NA	NA	NA	NA	NA	NA	NA	474	627	534	561	737	727	576	553	258	444	528	724	830	599	746	664
2202	1014.46	399.226		NA	NA	NA	NA	NA	NA	NA	NA	634	726	851	639	355	504	680	583	652	577	610	487	522	712	608	446
7645	952.82	360.266		NA	NA	NA	NA	NA	NA	NA	NA	491	465	476	386	1076	992	417	1319	510	481	368	901	481	384	397	445
9658	1034.31	380.341		NA	NA	NA	NA	NA	NA	NA	NA	415	0	0	460	646	490	0	390	452	0	844	673	656	2559	2007	0
2610	51.77	313.948		NA	NA	NA	NA	NA	NA	NA	NA	482	638	557	567	765	658	642	491	286	530	535	642	746	631	549	875
2890	55.33	234.049		NA	NA	NA	NA	NA	NA	NA	NA	453	636	523	515	331	416	428	413	397	526	462	330	786	984	1586	812
61	52.64	783.81		NA	NA	NA	NA	NA	NA	NA	NA	659	638	835	697	731	834	611	138	540	612	0	0	917	801	887	701
4781	245.18	320.077		NA	NA	NA	NA	NA	NA	NA	NA	652	562	286	421	301	427	727	649	333	425	613	920	831	848	812	797
11020	1079.82	136.099		NA	NA	NA	NA	NA	NA	NA	NA	459	571	717	619	495	526	582	358	767	611	592	609	589	526	820	765
3901	67.44	538.921		NA	NA	NA	NA	NA	NA	NA	NA	903	786	673	712	427	420	722	709	450	466	513	600	667	530	438	592
7936	967.35	164.084		NA	NA	NA	NA	NA	NA	NA	NA	462	513	667	410	495	698	338	562	1275	1389	223	861	281	318	246	874
3987	87.17	129.079		NA	NA	NA	NA	NA	NA	NA	NA	1211	798	1130	465	330	308	468	628	198	294	394	328	1066	922	514	558
8684	1003.36	731.507		NA	NA	NA	NA	NA	NA	NA	NA	613	612	768	1020	843	1355	0	872	584	1066	0	985	0	0	0	898
5777	520.72	406.109		NA	NA	NA	NA	NA	NA	NA	NA	543	742	403	747	800	1216	515	493	372	1186	520	679	321	329	313	437
3395	59.81	201.045		NA	NA	NA	NA	NA	NA	NA	NA	495	1649	1238	654	711	1073	150	704	337	303	279	453	385	379	253	554
27	50.41	197.048		NA	NA	NA	NA	NA	NA	NA	NA	826	776	0	851	841	940	762	678	454	825	992	851	0	0	0	829
2322	1045.93	588.403		NA	NA	NA	NA	NA	NA	NA	NA	209	186	0	0	197	0	1572	206	0	257	989	0	2153	1855	2004	0
4702	240.55	224.032		NA	NA	NA	NA	NA	NA	NA	NA	423	502	352	512	371	451	303	727	363	467	254	537	1305	1244	756	1064
4029	87.19	228.012		NA	NA	NA	NA	NA	NA	NA	NA	394	552	357	585	1020	1495	399	477	316	1366	569	548	329	278	397	552
7365	934.34	306.255		NA	NA	NA	NA	NA	NA	NA	NA	479	721	656	624	477	0	711	572	684	850	401	771	797	343	883	669
10474	1061.44	516.378		NA	NA	NA	NA	NA	NA	NA	NA	0	890	0	422	404	1127	480	1124	1404	688	532	0	0	842	879	854
2353	1051.88	314.085		NA	NA	NA	NA	NA	NA	NA	NA	475	664	740	438	455	439	897	614	518	421	661	496	778	855	792	425
1251	612.31	324.005		NA	NA	NA	NA	NA	NA	NA	NA	654	321	279	1095	225	640	444	1003	803	588	290	678	207	172	1795	476
6192	787.48	389.129		NA	NA	NA	NA	NA	NA	NA	NA	491	550	593	1113	804	527	515	536	685	493	548	527	686	550	612	440
10477	1061.49	270.197		NA	NA	NA	NA	NA	NA	NA	NA	686	550	658	582	398	538	554	754	550	504	754	703	557	566	717	604
3970	87.19	162.053		NA	NA	NA	NA	NA	NA	NA	NA	504	666	470	728	675	1122	756	596	209	857	709	631	434	411	328	581
1819	917.75	804.434		NA	NA	NA	NA	NA	NA	NA	NA	0	857	0	646	0	550	830	787	799	1209	0	440	556	1075	1205	724
7808	963.31	647.426		NA	NA	NA	NA	NA	NA	NA	NA	566	763	590	560	679	773	650	546	519	592	570	618	500	592	614	546
8630	999.57	516.376		NA	NA	NA	NA	NA	NA	NA	NA	0	0	0	1237	0	963	790	1058	0	967	0	0	0	1161	2307	1195
6574	854.84	234.198		NA	NA	NA	NA	NA	NA	NA	NA	477	644	630	575	870	549	481	645	499	686	678	591	563	491	727	573
4062	87.47	752.122		NA	NA	NA	NA	NA	NA	NA	NA	931	1075	745	845	383	368	998	739	0	304	461	656	701	777	0	702
5578	363.32	208.073		NA	NA	NA	NA	NA	NA	NA	NA	425	672	759	472	712	487	550	495	324	449	856	460	1059	1010	396	560
1699	875.13	818.511		NA	NA	NA	NA	NA	NA	NA	NA	0	440	681	988	895	588	675	688	818	890	575	710	769	599	155	216
3837	62.33	441.13		NA	NA	NA	NA	NA	NA	NA	NA	770	613	745	792	788	795	675	640	448	929	520	437	477	257	204	600
7356	931.61	671.415		NA	NA	NA	NA	NA	NA	NA	NA	533	622	582	849	633	687	540	700	592	632	0	734	653	650	571	713
7960	969.16	289.18		NA	NA	NA	NA	NA	NA	NA	NA	428	535	363	511	2818	1487	235	458	327	0	503	446	467	407	427	282
6668	866.77	234.198		NA	NA	NA	NA	NA	NA	NA	NA	710	719	523	568	739	747	555	654	474	563	598	611	515	524	637	561
5577	362.49	290.105		NA	NA	NA	NA	NA	NA	NA	NA	918	673	373	673	202	315	776	922	402	264	399	1217	660	672	684	549
8958	1009.85	136.093		NA	NA	NA	NA	NA	NA	NA	NA	502	892	717	736	636	940	610	647	0	427	671	645	542	475	667	596
5352	307.91	424.043		NA	NA	NA	NA	NA	NA	NA	NA	943	2011	359	1049	272	759	509	357	219	923	485	395	369	364	192	498
7569	948.44	262.229		NA	NA	NA	NA	NA	NA	NA	NA	0	903	693	661	702	704	641	581	573	564	946	0	657	712	660	710
7655	953.06	276.208		NA	NA	NA	NA	NA	NA	NA	NA	501	590	693	601	661	655	643	564	752	673	496	563	629	539	574	576
2319	1045.24	508.304		NA	NA	NA	NA	NA	NA	NA	NA	652	813	726	720	0	750	0	685	857	663	774	627	767	899	778	0
3239	56.79	255.933		NA	NA	NA	NA	NA	NA	NA	NA	723	464	961	783	633	526	394	689	424	536	386	666	674	593	482	777
10046	1048.77	192.137		NA	NA	NA	NA	NA	NA	NA	NA	722	562	646	610	705	552	1009	446	508	468	719	449	512	708	492	612
10136	1052.17	194.167		NA	NA	NA	NA	NA	NA	NA	NA	838	639	706	702	692	931	482	696	673	704	0	886	0	494	487	791
2192	1012.21	372.178		NA	NA	NA	NA	NA	NA	NA	NA	401	334	613	694	1427	876	337	546	348	824	582	575	611	558	500	496
1178	544.84	160.04		NA	NA	NA	NA	NA	NA	NA	NA	639	573	696	475	1079	1225	440	370	403	1182	609	313	403	356	367	596
9812	1040.06	306.291		NA	NA	NA	NA	NA	NA	NA	NA	1222	466	302	0	556	425	827	515	661	792	1293	237	1026	249	294	876
5665	408.36	362.1		NA	NA	NA	NA	NA	NA	NA	NA	571	415	450	432	1193	775	433	708	143	318	628	548	1262	1355	91	422
3800	62.03	90.0319		NA	NA	NA	NA	NA	NA	NA	NA	550	748	979	725	446	573	614	775	100	594	588	667	547	543	650	646
6328	822.97	740.274		NA	NA	NA	NA	NA	NA	NA	NA	419	446	993	559	833	805	178	609	537	540	668	637	620	712	676	521
7754	957.99	780.55		NA	NA	NA	NA	NA	NA	NA	NA	954	0	985	905	994	985	0	1014	0	950	0	947	0	975	0	1046
5575	362.65	529.153		NA	NA	NA	NA	NA	NA	NA	NA	1013	552	310	715	213	260	738	721	306	268	559	1185	687	786	661	785
6106	759.4	270.161		NA	NA	NA	NA	NA	NA	NA	NA	0	358	335	396	2234	2251	0	489	295	2053	0	264	322	361	405	0
1431	754.48	711.176		NA	NA	NA	NA	NA	NA	NA	NA	648	517	666	570	506	484	745	521	676	532	651	849	665	498	647	592
7099	912.44	708.468		NA	NA	NA	NA	NA	NA	NA	NA	365	1087	1051	0	0	844	0	0	0	705	900	708	858	780	1389	1083
7168	915.38	818.508		NA	NA	NA	NA	NA	NA	NA	NA	573	297	836	1021	1039	632	799	932	0	796	0	895	1058	703	196	0
9392	1027.88	182.13		NA	NA	NA	NA	NA	NA	NA	NA	580	588	764	688	660	601	569	483	581	669	516	573	684	639	578	606
9683	1036.82	288.272		NA	NA	NA	NA	NA	NA	NA	NA	1157	0	0	634	1015	1004	1147	0	910	627	1032	0	1264	0	0	990
5634	387.4	502.128		NA	NA	NA	NA	NA	NA	NA	NA	633	858	608	549	350	575	469	290	469	504	745	631	1019	935	589	556
2214	1020.44	381.347		NA	NA	NA	NA	NA	NA	NA	NA	765	258	0	888	885	505	0	621	1123	0	762	748	713	898	1141	475
10688	1068.15	715.517		NA	NA	NA	NA	NA	NA	NA	NA	889	818	811	301	503	864	891	235	519	0	473	844	788	457	909	481
995	362.1	203.082		NA	NA	NA	NA	NA	NA	NA	NA	444	461	329	701	830	1242	499	429	394	1699	656	713	364	227	325	471
6086	750.75	272.176		NA	NA	NA	NA	NA	NA	NA	NA	433	365	488	420	1411	1733	351	385	297	1382	305	418	520	434	396	446
8597	998.76	794.573		NA	NA	NA	NA	NA	NA	NA	NA	2124	838	1187	0	1035	0	783	0	0	0	516	1049	249	1163	0	842
2373	1057.39	558.375		NA	NA	NA	NA	NA	NA	NA	NA	785	645	697	547	570	684	696	518	537	597	660	593	531	599	609	519
6900	889.76	635.389		NA	NA	NA	NA	NA	NA	NA	NA	675	553	887	652	686	761	444	524	361	633	584	637	615	506	605	667
8556	996.99	759.568		NA	NA	NA	NA	NA	NA	NA	NA	0	0	1202	840	509	0	0	574	803	1863	957	0	515	0	1014	1517
1672	865.15	271.193		NA	NA	NA	NA	NA	NA	NA	NA	950	801	797	763	724	859	647	739	509	538	526	432	393	443	360	318
8073	975.75	606.465		NA	NA	NA	NA	NA	NA	NA	NA	413	1090	1124	799	438	422	296	650	398	414	495	286	1106	1145	364	361
1939	955.05	749.51		NA	NA	NA	NA	NA	NA	NA	NA	567	789	689	732	1028	895	71	617	1059	735	218	1065	152	157	0	1031
10266	1054.29	430.344		NA	NA	NA	NA	NA	NA	NA	NA	785	819	672	279	642	420	896	249	447	782	597	672	520	770	472	788
3605	62.16	718.069		NA	NA	NA	NA	NA	NA	NA	NA	1190	1114	796	996	230	128	1508	818	195	0	344	645	603	413	0	832
8622	999.11	528.379		NA	NA	NA	NA	NA	NA	NA	NA	240	874	0	801	0	806	706	556	775	1119	0	578	695	781	1048	839
9266	1019.53	410.197		NA	NA	NA	NA	NA	NA	NA	NA	733	701	619	555	698	1045	472	601	290	902	462	510	727	541	339	628
10008	1047.84	350.318		NA	NA	NA	NA	NA	NA	NA	NA	435	526	424	537	603	600	941	477	837	507	554	488	793	780	806	520
8127	978.37	599.409		NA	NA	NA	NA	NA	NA	NA	NA	681	710	758	636	577	844	454	792	714	838	217	835	292	344	352	787
3575	61.62	241.063		NA	NA	NA	NA	NA	NA	NA	NA	805	0	808	799	1655	658	1017	683	483	0	1017	652	0	475	0	787
10799	1074.31	707.461		NA	NA	NA	NA	NA	NA	NA	NA	221	1086	697	0	0	671	126	193	1045	226	1098	617	652	1215	1010	985
5353	310.04	262.106		NA	NA	NA	NA	NA	NA	NA	NA	1528	0	861	0	0	256	0	711	1030	402	266	117	940	1089	648	1995
10707	1069.92	588.474		NA	NA	NA	NA	NA	NA	NA	NA	743	639	426	617	840	578	356	800	610	674	600	761	318	538	600	746
8785	1007.53	98.0733		NA	NA	NA	NA	NA	NA	NA	NA	538	638	687	502	940	758	595	604	469	941	421	425	693	440	726	469
3618	61.41	661.207		NA	NA	NA	NA	NA	NA	NA	NA	450	327	420	510	868	849	920	1134	330	689	528	535	506	466	795	525
9708	1036.3	396.373		NA	NA	NA	NA	NA	NA	NA	NA	431	592	0	693	0	449	897	339	563	607	917	589	959	1102	911	807
947	330.03	188.083		NA	NA	NA	NA	NA	NA	NA	NA	1089	234	1069	820	399	345	592	722	463	324	918	707	567	603	530	475
6580	854.88	619.358		NA	NA	NA	NA	NA	NA	NA	NA	384	443	627	788	991	978	850	957	291	721	384	889	435	337	330	455
5986	689.16	197.178		NA	NA	NA	NA	NA	NA	NA	NA	599	599	582	695	671	576	530	400	781	719	739	518	707	613	602	536
6120	763.54	266.261		NA	NA	NA	NA	NA	NA	NA	NA	0	927	838	1389	190	1072	1287	859	0	1598	1122	165	200	225	0	0
7240	922.18	364.261		NA	NA	NA	NA	NA	NA	NA	NA	774	694	619	624	575	919	632	509	551	700	432	563	493	361	814	616
2550	50.12	189.982		NA	NA	NA	NA	NA	NA	NA	NA	494	560	642	700	728	773	549	513	350	556	544	584	780	656	652	795
3256	58.42	875.251		NA	NA	NA	NA	NA	NA	NA	NA	181	644	500	154	585	698	161	898	257	644	471	833	744	1011	1298	798
8977	1009.98	118.079		NA	NA	NA	NA	NA	NA	NA	NA	521	577	567	678	575	1016	527	574	677	650	634	649	487	612	616	521
7921	967.16	372.215		NA	NA	NA	NA	NA	NA	NA	NA	948	995	562	408	398	780	559	0	451	871	431	324	774	927	698	757
5332	302.72	898.169		NA	NA	NA	NA	NA	NA	NA	NA	1621	442	1471	592	161	254	613	87	0	219	296	1208	1037	696	0	1186
10094	1051.66	308.272		NA	NA	NA	NA	NA	NA	NA	NA	526	572	611	578	655	554	692	640	551	589	719	623	620	704	609	642
9976	1045.92	245.178		NA	NA	NA	NA	NA	NA	NA	NA	920	844	420	413	375	491	708	523	230	271	934	416	1078	1345	488	429
5862	622.33	692.212		NA	NA	NA	NA	NA	NA	NA	NA	730	215	1542	169	0	533	598	407	0	490	926	1368	790	993	662	463
4134	150.27	284.271		NA	NA	NA	NA	NA	NA	NA	NA	515	2133	560	499	579	489	439	414	527	428	459	449	433	932	529	503
1620	839.78	612.212		NA	NA	NA	NA	NA	NA	NA	NA	256	1369	1240	1594	161	1584	0	1436	296	1556	0	151	0	0	0	245
2057	985.9	570.235		NA	NA	NA	NA	NA	NA	NA	NA	439	738	0	802	0	852	942	778	706	735	0	659	812	865	852	715
8554	996.92	798.527		NA	NA	NA	NA	NA	NA	NA	NA	1918	809	1113	0	735	433	1003	447	479	0	0	769	0	883	482	824
5169	275.76	264.136		NA	NA	NA	NA	NA	NA	NA	NA	630	164	605	468	523	426	1237	815	349	352	643	711	939	640	405	998
9942	1044.75	475.339		NA	NA	NA	NA	NA	NA	NA	NA	844	829	965	780	1053	848	0	817	929	921	0	932	0	196	0	795
774	262.95	803.322		NA	NA	NA	NA	NA	NA	NA	NA	829	634	304	972	275	272	732	670	637	0	1041	822	794	779	559	600
6880	890.31	570.235		NA	NA	NA	NA	NA	NA	NA	NA	0	1137	1394	864	1329	1359	723	0	577	0	953	822	0	0	763	0
3957	86.95	718.068		NA	NA	NA	NA	NA	NA	NA	NA	882	1011	791	918	0	313	1370	612	240	368	429	613	728	632	87	927
9678	1037.53	355.307		NA	NA	NA	NA	NA	NA	NA	NA	786	593	714	382	643	626	616	533	595	676	578	658	621	562	747	597
8456	993.03	442.31		NA	NA	NA	NA	NA	NA	NA	NA	465	0	1100	474	1615	645	0	593	484	580	633	524	958	801	635	421
5951	676.84	306.183		NA	NA	NA	NA	NA	NA	NA	NA	337	288	439	423	2225	1898	216	438	259	1734	187	400	209	356	391	128
2812	52.95	729.793		NA	NA	NA	NA	NA	NA	NA	NA	800	0	843	704	796	772	561	784	0	0	633	710	685	935	855	851
9574	1031.13	546.354		NA	NA	NA	NA	NA	NA	NA	NA	409	866	604	638	573	608	932	583	584	553	593	333	767	945	630	318
8695	1003.81	495.407		NA	NA	NA	NA	NA	NA	NA	NA	588	666	494	589	634	647	595	563	601	668	563	579	845	719	614	577
9280	1020.37	633.402		NA	NA	NA	NA	NA	NA	NA	NA	528	563	586	458	491	714	510	889	372	836	614	708	755	616	777	525
2619	51.62	413.867		NA	NA	NA	NA	NA	NA	NA	NA	713	623	475	739	418	756	505	258	745	704	561	602	1023	564	636	623
914	319.31	90.0473		NA	NA	NA	NA	NA	NA	NA	NA	667	692	529	439	433	863	496	507	341	687	656	514	861	671	573	1019
7069	906.65	380.344		NA	NA	NA	NA	NA	NA	NA	NA	562	738	632	429	331	109	1140	487	295	517	1057	313	0	1794	1125	421
1799	911.05	717.576		NA	NA	NA	NA	NA	NA	NA	NA	654	369	0	464	589	264	0	524	777	141	791	880	1504	1050	1352	594
7551	945.54	352.261		NA	NA	NA	NA	NA	NA	NA	NA	367	533	969	646	574	649	489	727	514	543	461	673	759	712	801	536
3806	62.12	189.064		NA	NA	NA	NA	NA	NA	NA	NA	618	518	786	587	662	836	854	535	326	767	435	533	669	519	790	522
6623	859.08	604.269		NA	NA	NA	NA	NA	NA	NA	NA	2523	1161	840	1462	208	182	0	1508	189	1054	0	628	0	50	0	153
7935	967.25	442.291		NA	NA	NA	NA	NA	NA	NA	NA	744	585	753	554	520	625	510	591	516	728	636	705	559	501	721	718
9989	1046.25	599.498		NA	NA	NA	NA	NA	NA	NA	NA	864	417	505	0	436	430	0	714	808	955	1098	480	1010	652	590	1012
6985	898.48	568.449		NA	NA	NA	NA	NA	NA	NA	NA	0	802	0	763	0	455	795	866	892	1229	105	438	595	930	1098	1004
10080	1050.93	162.141		NA	NA	NA	NA	NA	NA	NA	NA	710	0	675	547	676	825	904	492	683	741	649	658	571	589	632	621
3232	56.59	294.929		NA	NA	NA	NA	NA	NA	NA	NA	606	1147	785	498	384	454	746	935	0	548	725	687	577	546	472	867
6809	881.58	557.279		NA	NA	NA	NA	NA	NA	NA	NA	723	753	655	654	458	782	918	347	377	672	686	761	571	413	464	745
1978	967.01	554.112		NA	NA	NA	NA	NA	NA	NA	NA	1114	653	709	369	596	407	785	498	617	394	533	701	689	638	704	576
9881	1043.53	469.276		NA	NA	NA	NA	NA	NA	NA	NA	828	895	769	857	863	855	0	779	882	867	95	975	0	200	182	938
9290	1020.83	635.415		NA	NA	NA	NA	NA	NA	NA	NA	527	717	568	832	571	680	559	591	357	757	665	629	755	646	573	558
7093	910.25	386.245		NA	NA	NA	NA	NA	NA	NA	NA	853	545	1265	969	784	741	346	646	367	507	500	531	471	448	333	682
3212	55.9	595.743		NA	NA	NA	NA	NA	NA	NA	NA	0	760	824	824	1249	1085	0	884	0	1055	933	911	0	0	648	815
7237	921.88	314.245		NA	NA	NA	NA	NA	NA	NA	NA	484	1203	698	560	733	533	493	492	410	555	493	658	667	787	616	608
3904	67.11	500.023		NA	NA	NA	NA	NA	NA	NA	NA	758	763	0	725	834	724	1188	874	644	852	879	0	0	0	808	949
6501	839.13	609.204		NA	NA	NA	NA	NA	NA	NA	NA	0	1396	1800	2048	0	1726	0	1324	0	1508	0	203	0	0	0	0
8324	988.8	405.259		NA	NA	NA	NA	NA	NA	NA	NA	0	913	244	890	251	783	758	781	867	845	197	559	674	710	784	750
6729	873.56	426.35		NA	NA	NA	NA	NA	NA	NA	NA	1243	149	0	141	2044	104	274	104	117	89	4021	94	1146	231	251	0
3702	61.5	477.153		NA	NA	NA	NA	NA	NA	NA	NA	564	200	719	168	823	1150	894	666	383	1141	574	579	765	673	117	595
9654	1034.21	308.23		NA	NA	NA	NA	NA	NA	NA	NA	492	714	0	993	0	1146	0	647	1019	1019	0	0	1254	1243	1485	0
7796	960.12	369.323		NA	NA	NA	NA	NA	NA	NA	NA	529	642	657	606	521	578	614	519	589	695	605	692	695	702	761	612
3039	55.26	567.742		NA	NA	NA	NA	NA	NA	NA	NA	500	1011	623	705	904	941	1086	738	233	664	650	535	659	0	0	769
1666	862.78	396.157		NA	NA	NA	NA	NA	NA	NA	NA	744	612	833	615	525	941	547	527	806	667	595	618	519	543	541	391
3274	57.06	262.981		NA	NA	NA	NA	NA	NA	NA	NA	559	407	718	554	263	405	361	843	899	339	930	641	784	953	896	473
203	62.06	412.115		NA	NA	NA	NA	NA	NA	NA	NA	750	765	512	1013	704	1046	654	452	287	1196	492	327	442	376	402	608
4782	244.1	392.094		NA	NA	NA	NA	NA	NA	NA	NA	574	1315	505	389	358	350	512	398	225	403	1216	1079	961	882	430	430
10435	1060.33	599.498		NA	NA	NA	NA	NA	NA	NA	NA	705	752	479	0	586	543	0	551	626	1527	897	415	1053	563	760	579
10791	1073.93	450.303		NA	NA	NA	NA	NA	NA	NA	NA	0	0	1491	1383	0	1514	1348	0	0	0	1513	0	1510	0	0	1280
9972	1045.9	768.48		NA	NA	NA	NA	NA	NA	NA	NA	780	1078	758	710	799	1009	191	663	754	736	245	809	127	397	209	775
1022	385.63	1238.22		NA	NA	NA	NA	NA	NA	NA	NA	0	664	804	1290	439	223	858	815	1091	146	0	925	847	736	456	749
1783	905.5	324.106		NA	NA	NA	NA	NA	NA	NA	NA	345	427	634	448	1025	971	295	434	402	846	817	671	722	765	562	679
8657	1002.6	352.298		NA	NA	NA	NA	NA	NA	NA	NA	591	378	621	376	1328	744	396	500	492	649	989	726	601	692	537	427
8970	1009.88	759.537		NA	NA	NA	NA	NA	NA	NA	NA	0	1453	677	566	545	0	603	0	920	0	0	717	0	1812	565	2190
5487	336.81	396.099		NA	NA	NA	NA	NA	NA	NA	NA	892	543	385	709	391	513	701	801	348	446	516	1255	680	565	600	703
714	256.04	563.113		NA	NA	NA	NA	NA	NA	NA	NA	327	481	201	753	1136	1680	569	822	207	1356	499	806	316	179	285	431
9389	1026.29	495.411		NA	NA	NA	NA	NA	NA	NA	NA	560	588	683	533	530	0	1085	635	0	893	897	587	1157	847	1056	0
8663	1004.45	672.471		NA	NA	NA	NA	NA	NA	NA	NA	589	559	592	824	579	645	649	631	533	728	632	543	639	663	628	625
4399	218.49	472.031		NA	NA	NA	NA	NA	NA	NA	NA	405	504	897	548	385	614	317	522	598	507	622	489	1655	1204	482	311
6594	857.03	292.239		NA	NA	NA	NA	NA	NA	NA	NA	458	639	317	249	552	1144	502	243	460	1542	491	213	976	724	1015	540
123	58.41	1164.25		NA	NA	NA	NA	NA	NA	NA	NA	552	471	857	0	685	615	1168	0	145	437	958	1097	982	988	589	521
2584	50.05	673.86		NA	NA	NA	NA	NA	NA	NA	NA	605	685	603	587	783	819	673	454	336	547	773	635	681	680	609	596
6532	843.73	194.129		NA	NA	NA	NA	NA	NA	NA	NA	414	660	530	495	1084	1144	440	578	559	1030	541	576	592	485	397	544
4682	237.05	505.162		NA	NA	NA	NA	NA	NA	NA	NA	601	743	628	707	346	594	494	944	484	575	537	774	559	368	531	1184
8115	977.16	199.965		NA	NA	NA	NA	NA	NA	NA	NA	758	409	756	759	711	552	640	720	533	0	637	759	774	596	804	663
7	49.03	1085.81		NA	NA	NA	NA	NA	NA	NA	NA	579	742	785	637	671	715	678	483	422	687	492	506	757	693	588	638
10828	1076.96	496.378		NA	NA	NA	NA	NA	NA	NA	NA	543	597	613	704	546	664	605	692	589	592	627	695	522	606	881	598
4379	217.81	408.18		NA	NA	NA	NA	NA	NA	NA	NA	294	573	592	626	330	388	459	418	167	421	359	480	690	450	2643	1187
5211	281.69	352.136		NA	NA	NA	NA	NA	NA	NA	NA	439	770	479	535	628	768	714	256	235	788	964	594	537	545	985	841
839	280.15	521.154		NA	NA	NA	NA	NA	NA	NA	NA	1546	2727	1177	89	0	476	330	261	273	547	199	0	578	388	175	1320
3278	57.12	149.007		NA	NA	NA	NA	NA	NA	NA	NA	610	766	903	444	461	644	696	509	555	600	405	645	902	813	567	571
3037	56.06	593.751		NA	NA	NA	NA	NA	NA	NA	NA	676	969	0	0	1052	1462	986	0	377	0	1182	944	846	899	698	0
4529	230.04	358.126		NA	NA	NA	NA	NA	NA	NA	NA	555	570	507	1048	316	248	474	1262	620	209	1751	956	527	654	169	229
2017	975	235.983		NA	NA	NA	NA	NA	NA	NA	NA	1457	520	0	511	1446	432	332	484	535	491	1315	265	865	420	544	483
4472	225.29	177.079		NA	NA	NA	NA	NA	NA	NA	NA	383	1228	327	286	1237	567	89	775	307	214	540	889	972	854	618	815
1166	511.03	185.071		NA	NA	NA	NA	NA	NA	NA	NA	385	590	444	610	1071	1249	593	445	382	1227	666	555	467	451	333	637
3839	62.39	255.075		NA	NA	NA	NA	NA	NA	NA	NA	1028	1008	911	695	600	797	766	875	155	828	678	222	94	159	352	937
6798	881.72	619.259		NA	NA	NA	NA	NA	NA	NA	NA	798	823	681	789	569	760	964	398	316	635	575	772	516	556	446	516
3411	58.25	454.005		NA	NA	NA	NA	NA	NA	NA	NA	621	836	668	816	755	730	1017	706	180	520	440	590	514	445	392	884
3610	61.52	145.075		NA	NA	NA	NA	NA	NA	NA	NA	576	621	766	504	517	609	659	574	323	718	548	574	726	781	798	824
3906	67.39	179.059		NA	NA	NA	NA	NA	NA	NA	NA	861	905	1079	0	1315	0	557	0	810	956	0	967	1459	1211	0	0
8209	982.61	272.16		NA	NA	NA	NA	NA	NA	NA	NA	810	380	893	690	902	0	647	732	0	681	795	808	742	605	704	735
9514	1031.34	671.482		NA	NA	NA	NA	NA	NA	NA	NA	539	690	773	355	624	641	921	498	0	464	910	260	904	869	1117	568
5779	531.14	205.074		NA	NA	NA	NA	NA	NA	NA	NA	754	499	901	440	1024	1072	372	383	419	1133	553	302	484	491	487	823
3050	56.21	525.764		NA	NA	NA	NA	NA	NA	NA	NA	509	0	694	777	0	1046	977	684	205	984	918	564	771	665	588	755
9763	1037.94	412.367		NA	NA	NA	NA	NA	NA	NA	NA	473	306	490	556	734	970	712	669	461	413	1235	428	543	520	1077	557
5962	678.36	694.397		NA	NA	NA	NA	NA	NA	NA	NA	0	262	498	417	910	1645	114	114	274	1963	638	1120	669	1068	146	310
2579	49.89	411.914		NA	NA	NA	NA	NA	NA	NA	NA	481	575	624	607	713	851	595	441	294	629	664	615	889	739	671	761
3984	87.11	971.187		NA	NA	NA	NA	NA	NA	NA	NA	844	1128	945	1055	338	367	1578	762	262	217	305	595	513	508	305	427
1153	496.73	341.087		NA	NA	NA	NA	NA	NA	NA	NA	865	560	622	578	435	586	401	470	336	593	568	401	965	1201	804	765
3501	58.74	163.085		NA	NA	NA	NA	NA	NA	NA	NA	441	408	501	545	1974	1008	426	437	248	1050	417	329	355	425	693	893
8971	1009.89	158.11		NA	NA	NA	NA	NA	NA	NA	NA	514	709	667	612	838	834	587	643	403	775	511	763	579	618	521	582
6408	828.27	470.175		NA	NA	NA	NA	NA	NA	NA	NA	568	750	1441	628	394	397	619	600	433	355	849	683	541	506	691	705
10345	1059.36	456.357		NA	NA	NA	NA	NA	NA	NA	NA	0	0	525	532	2193	1600	0	0	440	1179	869	0	1110	1151	569	0
1993	971.05	566.268		NA	NA	NA	NA	NA	NA	NA	NA	614	527	711	570	689	791	580	588	575	658	687	642	567	704	658	615
7797	960.68	766.525		NA	NA	NA	NA	NA	NA	NA	NA	690	599	0	766	881	921	264	916	842	0	750	1033	604	778	617	526
5455	328.51	467.242		NA	NA	NA	NA	NA	NA	NA	NA	370	444	1686	580	1110	1250	586	374	0	842	516	419	810	744	0	457
8730	1005.16	462.335		NA	NA	NA	NA	NA	NA	NA	NA	337	407	531	413	690	570	1185	404	333	260	1576	295	488	1256	1013	433
7851	963.26	464.336		NA	NA	NA	NA	NA	NA	NA	NA	724	614	832	667	507	902	572	600	447	830	722	601	607	571	606	390
1172	520.53	329.116		NA	NA	NA	NA	NA	NA	NA	NA	604	763	431	681	902	1097	618	524	445	1116	590	771	440	316	335	560
9378	1025.47	658.357		NA	NA	NA	NA	NA	NA	NA	NA	798	873	951	693	747	883	520	736	704	742	142	719	0	464	450	780
5866	625.63	338.114		NA	NA	NA	NA	NA	NA	NA	NA	490	624	1128	492	461	243	1578	281	536	446	1050	762	675	748	479	210
6199	787.56	567.205		NA	NA	NA	NA	NA	NA	NA	NA	641	572	531	689	1430	626	593	524	537	607	716	463	591	575	599	510
9915	1044.02	502.365		NA	NA	NA	NA	NA	NA	NA	NA	774	782	923	874	888	939	396	725	955	930	0	920	0	0	236	863
1911	943.72	113.954		NA	NA	NA	NA	NA	NA	NA	NA	756	576	554	684	497	610	604	714	538	843	569	739	487	737	574	726
10548	1063.53	662.446		NA	NA	NA	NA	NA	NA	NA	NA	0	671	687	629	769	848	601	562	781	708	712	691	564	711	648	632
1264	621.31	310.12		NA	NA	NA	NA	NA	NA	NA	NA	508	664	874	438	502	550	879	418	642	527	767	1105	677	734	543	387
2297	1043.51	401.71		NA	NA	NA	NA	NA	NA	NA	NA	871	1156	1122	0	1047	774	285	711	636	1044	139	969	0	401	303	762
9312	1023.94	590.38		NA	NA	NA	NA	NA	NA	NA	NA	593	582	597	480	597	601	847	554	543	626	671	619	665	806	754	685
1836	921.43	510.377		NA	NA	NA	NA	NA	NA	NA	NA	559	517	769	610	583	601	639	605	635	544	631	763	686	645	625	818
1679	867.05	552.418		NA	NA	NA	NA	NA	NA	NA	NA	366	435	617	436	2375	2352	211	263	107	1356	264	334	341	224	258	297
10179	1051.75	182.071		NA	NA	NA	NA	NA	NA	NA	NA	567	610	613	687	586	586	667	626	732	559	710	661	632	643	650	708
5838	605.46	476.168		NA	NA	NA	NA	NA	NA	NA	NA	808	653	653	461	918	660	430	1044	509	400	512	614	259	289	901	1127
377	187.59	295.055		NA	NA	NA	NA	NA	NA	NA	NA	378	1175	313	1733	167	143	1773	364	247	106	700	1315	664	448	194	519
10440	1060.57	148.11		NA	NA	NA	NA	NA	NA	NA	NA	525	546	717	582	650	849	626	606	1106	701	599	550	0	588	826	769
2049	984.03	430.061		NA	NA	NA	NA	NA	NA	NA	NA	466	1028	1228	544	206	170	757	589	404	207	1080	1197	583	325	676	780
6258	815.36	236.104		NA	NA	NA	NA	NA	NA	NA	NA	910	630	602	720	748	925	552	709	619	578	627	578	581	510	493	462
8724	1004.3	340.262		NA	NA	NA	NA	NA	NA	NA	NA	892	926	0	961	824	845	0	811	0	721	981	878	975	634	799	0
1436	754.8	890.277		NA	NA	NA	NA	NA	NA	NA	NA	423	726	644	618	620	582	610	662	818	632	562	651	695	563	656	787
6419	830.22	539.286		NA	NA	NA	NA	NA	NA	NA	NA	0	0	1890	958	498	608	575	2375	711	445	640	576	504	476	0	0
2481	3.86	284.271		NA	NA	NA	NA	NA	NA	NA	NA	607	1465	482	440	537	455	443	467	465	819	365	781	1382	459	648	442
3959	87.28	220.058		NA	NA	NA	NA	NA	NA	NA	NA	361	523	343	583	209	269	680	533	491	295	647	864	884	724	1790	1067
6579	855.01	624.313		NA	NA	NA	NA	NA	NA	NA	NA	415	507	680	686	922	931	798	993	394	633	549	924	517	490	281	545
8141	977.68	162.141		NA	NA	NA	NA	NA	NA	NA	NA	658	543	708	647	813	688	669	618	463	881	612	605	669	540	504	649
3321	57.4	130.996		NA	NA	NA	NA	NA	NA	NA	NA	571	655	575	605	439	511	458	812	524	419	1137	646	829	833	579	678
3513	59.03	128.059		NA	NA	NA	NA	NA	NA	NA	NA	599	691	560	473	512	487	824	569	338	659	468	521	755	919	879	1025
6154	776.34	346.175		NA	NA	NA	NA	NA	NA	NA	NA	296	396	429	337	1657	1908	268	554	294	1772	251	435	334	351	567	431
7378	934.44	265.204		NA	NA	NA	NA	NA	NA	NA	NA	528	569	963	575	942	974	527	543	303	713	534	604	721	673	542	572
10092	1049.13	496.356		NA	NA	NA	NA	NA	NA	NA	NA	364	398	1132	563	454	0	1508	0	410	463	1763	0	516	1086	1219	408
4097	97.69	187.048		NA	NA	NA	NA	NA	NA	NA	NA	0	598	504	623	598	1070	666	568	355	1166	684	1009	485	442	946	574
3841	62.42	493.085		NA	NA	NA	NA	NA	NA	NA	NA	931	0	643	724	657	650	808	539	653	534	719	690	742	827	569	604
380	189.38	259.095		NA	NA	NA	NA	NA	NA	NA	NA	453	600	403	621	689	1095	535	824	309	864	1091	1053	424	539	317	475
4214	193.26	418.111		NA	NA	NA	NA	NA	NA	NA	NA	257	448	881	649	471	633	372	382	358	716	904	263	1596	1374	419	571
9865	1042.4	457.327		NA	NA	NA	NA	NA	NA	NA	NA	98	265	248	215	266	986	1475	150	111	1092	797	932	1073	1238	1146	202
11016	1078.54	422.267		NA	NA	NA	NA	NA	NA	NA	NA	383	725	1000	1368	452	1614	212	1570	591	841	262	483	404	0	0	392
351	168.28	400.094		NA	NA	NA	NA	NA	NA	NA	NA	674	609	535	681	403	466	680	685	386	447	631	1096	805	687	743	769
8029	973.62	174.14		NA	NA	NA	NA	NA	NA	NA	NA	815	575	608	529	894	629	358	631	675	707	670	798	613	498	696	606
9601	1034.7	426.239		NA	NA	NA	NA	NA	NA	NA	NA	572	530	504	387	450	489	744	414	567	544	649	524	1261	1078	1099	501
1517	794.77	195.072		NA	NA	NA	NA	NA	NA	NA	NA	436	452	604	466	383	1056	463	950	284	1446	1406	336	514	429	472	617
2061	988.13	521.33		NA	NA	NA	NA	NA	NA	NA	NA	757	458	496	263	288	888	300	289	602	1061	1207	327	702	891	1095	693
9033	1011.54	426.337		NA	NA	NA	NA	NA	NA	NA	NA	0	949	930	837	1366	1222	0	1080	578	822	0	875	820	0	0	838
1954	958.77	643.453		NA	NA	NA	NA	NA	NA	NA	NA	766	666	564	646	642	667	664	716	557	680	544	649	612	707	620	619
3373	57.88	448.06		NA	NA	NA	NA	NA	NA	NA	NA	574	615	731	568	392	488	1221	852	419	461	461	1033	517	635	737	615
8450	991.82	134.11		NA	NA	NA	NA	NA	NA	NA	NA	576	674	395	701	479	781	635	661	866	836	503	511	508	635	708	852
2159	1009.6	195.163		NA	NA	NA	NA	NA	NA	NA	NA	741	864	614	669	895	739	528	653	506	539	480	741	724	666	462	500
54	52.11	647.833		NA	NA	NA	NA	NA	NA	NA	NA	735	813	840	687	920	881	60	106	236	785	668	831	937	228	771	825
9714	1036.45	538.28		NA	NA	NA	NA	NA	NA	NA	NA	448	478	685	759	791	438	701	668	894	570	972	618	784	719	473	326
4076	91.2	332.11		NA	NA	NA	NA	NA	NA	NA	NA	0	417	328	272	335	360	244	535	500	280	629	372	2840	2304	604	304
1072	431.89	758.192		NA	NA	NA	NA	NA	NA	NA	NA	523	540	618	601	482	499	739	524	696	422	636	613	947	665	762	1058
4451	224.62	396.103		NA	NA	NA	NA	NA	NA	NA	NA	526	436	444	588	603	524	611	518	240	469	1110	522	1348	1245	569	572
11015	1078.52	198.162		NA	NA	NA	NA	NA	NA	NA	NA	648	657	661	611	721	678	595	761	556	759	628	545	715	583	658	550
3849	63.41	289.023		NA	NA	NA	NA	NA	NA	NA	NA	401	526	370	467	1554	764	238	721	784	539	747	544	704	784	684	502
697	253.01	344.081		NA	NA	NA	NA	NA	NA	NA	NA	427	559	470	806	768	1422	968	600	361	885	934	0	592	516	460	561
7658	953.39	578.282		NA	NA	NA	NA	NA	NA	NA	NA	800	695	1184	1043	353	228	199	1162	756	1256	163	1167	123	1102	0	101
5959	678.51	384.184		NA	NA	NA	NA	NA	NA	NA	NA	478	439	536	571	1015	980	424	305	489	1040	737	975	730	692	435	497
6633	860.88	495.356		NA	NA	NA	NA	NA	NA	NA	NA	601	364	1150	479	671	723	271	644	661	704	351	450	1039	1082	801	355
611	235.83	1510.54		NA	NA	NA	NA	NA	NA	NA	NA	1400	726	324	1116	0	246	1021	321	521	0	1270	889	0	865	1111	538
4002	87.04	225.064		NA	NA	NA	NA	NA	NA	NA	NA	945	852	1032	726	527	640	600	741	340	838	534	488	457	326	561	743
338	136.77	247.992		NA	NA	NA	NA	NA	NA	NA	NA	738	385	245	752	209	101	200	775	872	88	119	408	356	339	4358	407
8814	1008.4	240.188		NA	NA	NA	NA	NA	NA	NA	NA	804	0	4384	0	0	1114	0	0	682	1256	0	1158	0	958	0	0
8992	1010.18	838.49		NA	NA	NA	NA	NA	NA	NA	NA	267	740	198	483	372	1119	208	237	616	166	1237	214	310	222	1880	2097
10821	1076.2	440.365		NA	NA	NA	NA	NA	NA	NA	NA	840	431	698	601	388	543	694	813	140	462	1076	952	788	892	433	624
7107	910.31	272.16		NA	NA	NA	NA	NA	NA	NA	NA	589	765	648	606	610	593	622	618	670	580	687	586	791	676	667	668
6866	887.8	676.367		NA	NA	NA	NA	NA	NA	NA	NA	517	403	951	451	1160	1094	298	656	363	700	567	837	609	507	747	520
10647	1066.23	337.268		NA	NA	NA	NA	NA	NA	NA	NA	881	905	0	1089	1223	728	0	776	617	505	888	622	0	451	675	1032
4039	87.06	157.147		NA	NA	NA	NA	NA	NA	NA	NA	802	682	784	669	673	830	771	528	481	829	392	462	417	388	270	1416
9775	1038.65	304.24		NA	NA	NA	NA	NA	NA	NA	NA	484	359	572	788	946	684	1124	416	634	768	544	448	617	606	658	749
57	52.3	1293.66		NA	NA	NA	NA	NA	NA	NA	NA	567	657	691	690	558	624	578	737	482	643	772	822	792	286	852	672
4138	159.88	284.271		NA	NA	NA	NA	NA	NA	NA	NA	567	621	0	1938	783	1516	496	411	485	732	597	448	439	467	462	464
10859	1075.55	446.374		NA	NA	NA	NA	NA	NA	NA	NA	859	807	439	854	936	943	681	709	437	474	941	485	484	565	0	813
1802	913.67	703.51		NA	NA	NA	NA	NA	NA	NA	NA	466	780	734	658	568	657	630	507	581	782	616	779	714	621	672	665
1792	906.85	736.318		NA	NA	NA	NA	NA	NA	NA	NA	550	436	1426	834	2108	0	205	652	770	686	742	0	595	447	560	422
804	270.03	750.188		NA	NA	NA	NA	NA	NA	NA	NA	893	676	631	832	491	478	1112	790	429	478	941	0	0	0	1625	1060
7476	940.18	602.328		NA	NA	NA	NA	NA	NA	NA	NA	427	588	722	621	1033	866	839	1120	338	434	368	1187	574	327	339	664
9409	1027.26	424.334		NA	NA	NA	NA	NA	NA	NA	NA	512	403	0	547	1296	0	422	0	354	1220	1361	1029	1193	1365	750	0
6555	850.65	311.318		NA	NA	NA	NA	NA	NA	NA	NA	302	67	3331	108	176	158	86	169	595	60	2819	125	84	130	465	1779
2989	54.98	225.89		NA	NA	NA	NA	NA	NA	NA	NA	618	1057	574	683	595	791	948	736	355	601	559	566	509	503	557	804
10636	1066.43	141.116		NA	NA	NA	NA	NA	NA	NA	NA	715	629	635	598	1183	563	563	471	704	475	527	652	588	692	867	598
5990	690.92	306.182		NA	NA	NA	NA	NA	NA	NA	NA	389	312	313	315	2437	1812	234	591	259	1644	361	331	374	319	502	269
6899	889.79	567.227		NA	NA	NA	NA	NA	NA	NA	NA	584	665	981	585	690	864	544	519	277	835	746	511	847	559	598	662
3744	62.7	261.031		NA	NA	NA	NA	NA	NA	NA	NA	392	1101	682	514	687	1174	529	541	404	886	685	570	510	557	584	657
4292	209.51	506.033		NA	NA	NA	NA	NA	NA	NA	NA	687	536	617	757	610	676	732	460	263	490	1314	758	299	237	1044	994
3518	59.39	835.263		NA	NA	NA	NA	NA	NA	NA	NA	481	609	1076	756	0	466	1392	1138	139	102	669	809	863	910	389	678
9136	1014.8	705.46		NA	NA	NA	NA	NA	NA	NA	NA	266	439	408	456	1296	1271	493	590	205	1565	1009	616	425	473	436	532
548	227.05	243.11		NA	NA	NA	NA	NA	NA	NA	NA	477	1307	421	481	426	807	429	386	286	935	451	724	1238	951	390	777
8183	979.91	576.511		NA	NA	NA	NA	NA	NA	NA	NA	1027	784	1004	0	0	0	810	807	724	700	623	873	768	892	724	752
6504	842.61	639.225		NA	NA	NA	NA	NA	NA	NA	NA	785	772	781	772	497	470	697	611	404	618	829	726	764	534	627	603
5448	326.83	372.121		NA	NA	NA	NA	NA	NA	NA	NA	529	861	608	521	763	508	563	857	146	332	1046	497	788	856	654	962
10870	1075.99	500.356		NA	NA	NA	NA	NA	NA	NA	NA	0	2034	0	0	0	0	2198	2254	0	0	0	2062	0	0	0	1944
5458	330.51	305.09		NA	NA	NA	NA	NA	NA	NA	NA	754	444	535	355	193	671	273	311	159	664	689	426	698	1513	2080	728
10492	1063.16	253.204		NA	NA	NA	NA	NA	NA	NA	NA	1158	788	1329	484	1497	764	353	701	696	586	490	179	315	427	358	376
2690	53.05	683.8		NA	NA	NA	NA	NA	NA	NA	NA	639	1201	881	930	787	0	0	848	0	849	731	929	882	0	913	913
1401	732.87	361.142		NA	NA	NA	NA	NA	NA	NA	NA	581	572	459	627	427	941	543	451	802	791	574	476	846	763	589	1065
3933	74.9	173.879		NA	NA	NA	NA	NA	NA	NA	NA	637	746	660	768	583	858	663	609	414	698	629	712	530	609	544	847
7614	949.74	176.048		NA	NA	NA	NA	NA	NA	NA	NA	545	1024	1108	788	561	567	620	637	410	449	508	680	871	752	575	412
5736	461.8	362.097		NA	NA	NA	NA	NA	NA	NA	NA	793	859	475	955	977	1411	652	564	345	1064	527	445	304	323	149	664
2314	1044.84	804.418		NA	NA	NA	NA	NA	NA	NA	NA	945	813	1178	1109	1098	947	0	919	802	756	0	1016	0	0	296	635
9262	1019.25	332.218		NA	NA	NA	NA	NA	NA	NA	NA	379	711	565	561	755	765	881	458	599	613	626	673	1210	528	760	437
10626	1067.62	98.0734		NA	NA	NA	NA	NA	NA	NA	NA	873	597	868	560	944	746	675	544	621	700	596	499	528	718	516	539
3697	61.19	217.095		NA	NA	NA	NA	NA	NA	NA	NA	538	1363	838	529	524	665	690	659	349	658	654	559	562	597	484	860
7828	964.04	486.317		NA	NA	NA	NA	NA	NA	NA	NA	762	641	799	786	619	807	422	573	425	698	636	637	499	592	722	917
10772	1073.04	666.487		NA	NA	NA	NA	NA	NA	NA	NA	775	667	1643	1327	592	836	306	700	284	642	1214	331	350	0	299	572
3668	62.59	135.068		NA	NA	NA	NA	NA	NA	NA	NA	0	101	865	1584	0	0	913	0	346	0	0	0	1762	607	2528	1834
3869	62.91	286.061		NA	NA	NA	NA	NA	NA	NA	NA	342	787	536	574	581	846	535	444	535	1236	592	459	936	710	702	728
8261	985.09	714.509		NA	NA	NA	NA	NA	NA	NA	NA	801	652	0	590	375	1039	444	769	803	237	443	786	1035	812	1110	657
7097	910.31	512.297		NA	NA	NA	NA	NA	NA	NA	NA	819	505	966	349	773	1306	207	491	357	955	673	554	660	736	615	592
8974	1009.93	96.0578		NA	NA	NA	NA	NA	NA	NA	NA	607	692	686	817	726	733	621	646	549	700	680	655	542	556	564	799
4080	89.82	263.028		NA	NA	NA	NA	NA	NA	NA	NA	168	729	760	576	640	605	605	752	301	457	1031	532	813	785	733	1090
9578	1031.16	276.208		NA	NA	NA	NA	NA	NA	NA	NA	648	792	874	656	639	686	651	560	636	750	547	618	646	598	548	729
7767	959.23	744.493		NA	NA	NA	NA	NA	NA	NA	NA	0	900	574	1111	0	1030	697	0	1001	813	915	905	782	362	507	985
6776	878.26	121.074		NA	NA	NA	NA	NA	NA	NA	NA	722	666	996	622	791	641	450	696	494	603	694	522	788	688	769	441
3643	62.06	752.122		NA	NA	NA	NA	NA	NA	NA	NA	1072	1254	1104	1225	271	225	1748	882	109	0	0	617	611	609	182	674
5677	409.67	387.151		NA	NA	NA	NA	NA	NA	NA	NA	1125	1042	472	0	390	600	905	512	405	823	780	631	815	529	692	864
7834	964.45	582.411		NA	NA	NA	NA	NA	NA	NA	NA	942	806	820	906	1107	1111	0	828	977	993	0	951	0	0	0	1145
1901	940.17	597.374		NA	NA	NA	NA	NA	NA	NA	NA	399	555	666	700	1107	1042	750	1060	336	502	565	1101	504	408	349	546
616	236.11	814.086		NA	NA	NA	NA	NA	NA	NA	NA	1446	0	1446	0	1254	1302	0	0	0	1330	0	0	1450	0	1099	1263
7997	970.96	256.24		NA	NA	NA	NA	NA	NA	NA	NA	349	454	782	593	793	882	456	719	495	791	607	713	765	789	683	729
3553	60.06	372.065		NA	NA	NA	NA	NA	NA	NA	NA	496	508	461	407	968	1548	470	513	429	1589	560	381	463	512	631	666
3018	56.02	433.763		NA	NA	NA	NA	NA	NA	NA	NA	472	541	531	825	1006	934	585	649	347	907	887	587	729	666	170	768
11008	1078.82	282.142		NA	NA	NA	NA	NA	NA	NA	NA	1606	0	0	1636	1482	0	1570	0	1405	1432	0	0	0	1475	0	0
945	329.55	575.122		NA	NA	NA	NA	NA	NA	NA	NA	1313	92	952	1043	309	466	696	816	455	431	977	918	584	608	578	372
7948	968.26	320.234		NA	NA	NA	NA	NA	NA	NA	NA	735	793	874	352	658	623	386	641	593	714	515	793	754	791	656	737
10370	1060.59	300.282		NA	NA	NA	NA	NA	NA	NA	NA	771	606	676	582	671	661	703	644	703	590	596	625	660	670	857	601
6083	749.8	289.261		NA	NA	NA	NA	NA	NA	NA	NA	584	531	592	496	556	472	757	695	747	595	692	639	852	645	797	967
5820	585.33	543.168		NA	NA	NA	NA	NA	NA	NA	NA	791	763	449	741	548	547	480	569	571	531	602	910	788	830	710	787
2535	51.81	457.849		NA	NA	NA	NA	NA	NA	NA	NA	482	566	1063	618	528	570	481	707	547	442	598	983	844	721	680	789
6649	864.35	356.235		NA	NA	NA	NA	NA	NA	NA	NA	502	487	900	914	0	1233	596	1285	545	640	502	1163	505	327	472	548
53	52.04	109.064	L-Histidin, in-source fragment	NA	NA	NA	NA	NA	NA	NA	NA	445	818	1126	734	546	416	483	835	281	295	396	496	742	906	979	1123
1950	957.2	591.495		NA	NA	NA	NA	NA	NA	NA	NA	906	479	475	651	818	574	605	581	508	611	709	972	484	747	586	920
5078	265.54	202.074		NA	NA	NA	NA	NA	NA	NA	NA	457	540	564	544	1402	2065	319	418	315	1898	332	263	320	386	395	408
2245	1029.2	677.464		NA	NA	NA	NA	NA	NA	NA	NA	710	775	669	823	1000	986	426	820	358	1015	422	785	460	432	340	608
5286	296.8	362.1		NA	NA	NA	NA	NA	NA	NA	NA	563	893	948	767	835	609	493	694	276	473	523	694	922	799	644	500
3020	56.05	545.944		NA	NA	NA	NA	NA	NA	NA	NA	603	682	538	585	288	455	793	442	330	385	285	672	892	1214	1456	1014
2108	999.51	416.731		NA	NA	NA	NA	NA	NA	NA	NA	1622	1239	804	0	593	0	1242	0	0	1059	414	923	0	1315	0	1424
5595	371.52	171.066		NA	NA	NA	NA	NA	NA	NA	NA	371	539	362	852	678	1383	614	606	311	1302	675	671	475	346	730	722
3586	61.34	740.159		NA	NA	NA	NA	NA	NA	NA	NA	616	782	936	943	469	492	1007	720	356	342	558	640	872	867	398	645
9085	1012.98	426.297		NA	NA	NA	NA	NA	NA	NA	NA	953	708	1314	673	798	841	0	693	568	731	462	761	562	548	359	675
5050	264.7	396.099		NA	NA	NA	NA	NA	NA	NA	NA	512	1216	356	561	503	668	447	853	324	691	569	665	1045	883	584	770
7364	932.77	424.281		NA	NA	NA	NA	NA	NA	NA	NA	782	584	1039	592	876	831	706	532	466	776	631	490	579	444	456	866
7234	922.2	707.477		NA	NA	NA	NA	NA	NA	NA	NA	881	236	905	0	698	842	725	905	1059	879	0	1052	326	901	0	1243
9629	1032.9	330.278		NA	NA	NA	NA	NA	NA	NA	NA	755	486	464	808	955	683	0	653	744	0	1296	419	1008	1063	656	664
8982	1010.88	126.141		NA	NA	NA	NA	NA	NA	NA	NA	736	698	722	768	611	704	592	780	513	654	765	563	576	767	688	523
3414	58.27	542.125		NA	NA	NA	NA	NA	NA	NA	NA	611	619	579	831	811	988	820	678	303	733	787	610	720	533	548	489
4643	234.74	178.063		NA	NA	NA	NA	NA	NA	NA	NA	618	611	582	845	358	474	805	540	534	401	1115	1091	728	654	727	581
10782	1073.2	282.142		NA	NA	NA	NA	NA	NA	NA	NA	0	0	0	1428	0	1772	0	0	1616	0	1639	0	1551	0	1360	1300
5184	278.51	201.1		NA	NA	NA	NA	NA	NA	NA	NA	589	647	981	686	961	586	419	898	330	245	264	627	939	1088	636	775
2590	50.43	462.915		NA	NA	NA	NA	NA	NA	NA	NA	518	708	677	593	715	936	719	772	432	702	587	663	663	642	698	649
2911	53.83	611.824		NA	NA	NA	NA	NA	NA	NA	NA	566	1019	672	738	478	921	788	414	147	839	559	748	679	652	639	823
2392	1060.68	137.096		NA	NA	NA	NA	NA	NA	NA	NA	752	668	577	465	1010	1108	517	565	655	813	594	659	534	479	575	712
169	60.33	366.163		NA	NA	NA	NA	NA	NA	NA	NA	543	663	1145	839	669	797	438	765	456	515	596	605	531	382	531	1210
3945	85.39	232.035		NA	NA	NA	NA	NA	NA	NA	NA	793	646	697	467	427	996	499	840	255	1116	1115	682	517	499	452	689
1887	937.28	306.233		NA	NA	NA	NA	NA	NA	NA	NA	876	776	766	737	945	1171	0	724	1231	996	0	1162	0	0	0	1310
9730	1037.14	363.277		NA	NA	NA	NA	NA	NA	NA	NA	0	0	342	2120	1289	1910	546	338	602	2404	0	874	0	0	0	269
3022	56.07	555.854		NA	NA	NA	NA	NA	NA	NA	NA	657	461	821	916	0	861	573	869	2022	0	0	956	0	0	1660	899
9157	1015.72	340.293		NA	NA	NA	NA	NA	NA	NA	NA	1067	0	1287	0	0	1045	0	1467	978	1014	0	1024	0	917	972	924
5289	298.52	203.058		NA	NA	NA	NA	NA	NA	NA	NA	538	603	423	798	906	1212	706	446	503	1197	570	511	523	438	591	732
1182	548.21	197.142		NA	NA	NA	NA	NA	NA	NA	NA	576	554	656	655	1254	628	583	608	670	679	629	658	509	600	623	820
5516	345	413.132		NA	NA	NA	NA	NA	NA	NA	NA	790	659	769	843	301	735	422	674	345	623	621	481	601	336	1044	1459
4712	239.94	560.187		NA	NA	NA	NA	NA	NA	NA	NA	685	467	765	862	518	510	675	702	688	353	659	511	878	1126	487	821
6370	827.15	268.167		NA	NA	NA	NA	NA	NA	NA	NA	524	655	880	529	536	695	646	928	697	696	577	577	828	688	606	647
3757	62.28	100.016		NA	NA	NA	NA	NA	NA	NA	NA	696	580	714	732	527	79	692	610	382	510	704	696	737	686	1262	1103
259	62.43	340.118		NA	NA	NA	NA	NA	NA	NA	NA	475	490	513	557	606	677	178	581	509	679	579	467	1583	1470	799	551
3004	54.76	211.835		NA	NA	NA	NA	NA	NA	NA	NA	613	1006	474	555	1040	609	1156	500	310	627	852	590	620	484	539	741
39	50.87	282.933		NA	NA	NA	NA	NA	NA	NA	NA	531	550	634	667	1197	851	571	661	384	671	492	627	840	799	717	534
3201	55.78	799.705		NA	NA	NA	NA	NA	NA	NA	NA	0	924	905	876	0	1099	759	734	459	796	930	788	811	0	635	1022
5037	264.05	333.132		NA	NA	NA	NA	NA	NA	NA	NA	290	754	680	507	372	715	477	605	271	910	391	467	735	875	1724	972
2748	53.8	811.747		NA	NA	NA	NA	NA	NA	NA	NA	722	1016	777	722	800	787	1285	884	239	751	602	673	541	0	0	954
2569	49.78	543.904		NA	NA	NA	NA	NA	NA	NA	NA	614	709	582	694	947	959	718	566	340	948	687	567	0	844	780	804
3815	62.21	232.106		NA	NA	NA	NA	NA	NA	NA	NA	646	956	642	672	676	706	743	661	476	712	704	609	629	631	670	630
7885	965.14	386.245		NA	NA	NA	NA	NA	NA	NA	NA	146	792	1223	1752	237	1733	183	1767	425	1134	246	231	172	0	169	553
1613	837.25	266.115		NA	NA	NA	NA	NA	NA	NA	NA	1167	721	719	657	812	771	770	636	701	591	698	579	488	540	507	412
8735	1005.83	428.252		NA	NA	NA	NA	NA	NA	NA	NA	884	617	610	390	698	498	732	540	683	645	902	688	800	577	887	626
1768	902.22	334.144		NA	NA	NA	NA	NA	NA	NA	NA	648	579	535	463	1529	1472	611	477	434	1145	463	506	424	460	489	545
6974	897.27	834.535		NA	NA	NA	NA	NA	NA	NA	NA	581	470	735	962	1099	541	703	843	725	690	700	742	827	655	126	384
9562	1030.43	608.289		NA	NA	NA	NA	NA	NA	NA	NA	1208	1132	746	1022	535	695	233	1054	961	936	0	918	212	328	237	567
6952	894.63	371.339		NA	NA	NA	NA	NA	NA	NA	NA	755	637	790	672	677	585	634	696	648	651	632	642	694	603	705	764
9861	1042.73	382.287		NA	NA	NA	NA	NA	NA	NA	NA	723	441	1704	668	615	770	394	605	419	777	401	497	539	660	619	953
1817	917.32	450.065		NA	NA	NA	NA	NA	NA	NA	NA	780	621	820	772	1407	1213	425	488	441	726	433	388	641	470	444	719
5548	353.45	429.109		NA	NA	NA	NA	NA	NA	NA	NA	683	336	504	530	759	730	484	1277	261	524	715	243	697	498	938	1612
2399	1061.11	188.994		NA	NA	NA	NA	NA	NA	NA	NA	727	577	665	727	1117	1086	582	567	443	1056	587	557	554	547	458	542
9757	1038.45	349.317		NA	NA	NA	NA	NA	NA	NA	NA	710	909	600	535	399	513	953	822	487	630	683	516	825	788	933	496
1415	740.3	589.196		NA	NA	NA	NA	NA	NA	NA	NA	239	1058	852	1011	177	313	1066	698	499	191	676	1572	585	447	720	700
2370	1055.9	796.709		NA	NA	NA	NA	NA	NA	NA	NA	421	794	475	454	0	347	1354	611	442	633	1322	519	227	1670	1540	0
8446	991.71	328.261		NA	NA	NA	NA	NA	NA	NA	NA	1084	537	1043	472	639	570	512	659	640	610	730	790	586	675	562	702
6651	864.22	260.214		NA	NA	NA	NA	NA	NA	NA	NA	517	767	641	597	847	954	632	896	496	758	460	862	510	626	601	650
9890	1045.29	646.518		NA	NA	NA	NA	NA	NA	NA	NA	1226	569	206	926	533	350	391	366	2709	823	741	409	163	172	192	1039
9557	1029.79	528.379		NA	NA	NA	NA	NA	NA	NA	NA	914	795	688	681	929	732	383	829	826	1003	324	892	209	415	313	887
1536	804.13	486.323		NA	NA	NA	NA	NA	NA	NA	NA	586	582	1246	669	844	901	523	476	369	892	563	1028	643	550	400	551
10679	1067.68	121.074		NA	NA	NA	NA	NA	NA	NA	NA	931	875	1142	0	766	575	664	492	513	737	651	549	863	589	749	729
9281	1021.06	410.318		NA	NA	NA	NA	NA	NA	NA	NA	310	500	415	387	377	655	515	446	0	479	609	441	322	3498	1373	499
9462	1028	199.158		NA	NA	NA	NA	NA	NA	NA	NA	584	671	858	761	758	567	564	530	605	544	666	605	794	824	845	651
9774	1038.64	148.11		NA	NA	NA	NA	NA	NA	NA	NA	956	867	791	0	869	734	649	708	807	861	466	754	467	495	640	764
5032	263.95	516.164		NA	NA	NA	NA	NA	NA	NA	NA	336	1054	975	905	625	722	552	511	618	715	1344	610	531	521	436	375
2646	53.35	909.754		NA	NA	NA	NA	NA	NA	NA	NA	950	782	831	735	799	899	1003	816	0	660	671	0	635	624	569	860
2413	1064.92	228.137		NA	NA	NA	NA	NA	NA	NA	NA	883	898	0	923	1079	1040	1079	886	955	0	936	1078	0	0	1082	0
5547	352.83	244.146		NA	NA	NA	NA	NA	NA	NA	NA	475	296	1254	463	927	906	423	618	211	575	817	674	1114	1076	481	531
46	51.07	1121.77		NA	NA	NA	NA	NA	NA	NA	NA	620	807	589	637	667	793	615	566	327	720	631	678	976	777	619	820
8535	996.38	711.487		NA	NA	NA	NA	NA	NA	NA	NA	1373	648	300	234	0	560	494	638	761	1006	1041	477	981	692	890	748
6681	866.17	258.197		NA	NA	NA	NA	NA	NA	NA	NA	634	661	796	613	1199	1284	550	571	476	1068	603	422	474	505	483	506
1171	520.52	456.163		NA	NA	NA	NA	NA	NA	NA	NA	321	418	507	436	516	483	888	809	110	394	1586	872	1197	1105	562	645
2021	975.69	111.993		NA	NA	NA	NA	NA	NA	NA	NA	502	798	418	656	487	703	857	619	754	809	567	797	484	590	860	950
5298	300.07	252.099		NA	NA	NA	NA	NA	NA	NA	NA	662	868	860	331	715	578	536	1375	312	438	1208	936	384	256	697	698
8939	1010.47	723.485		NA	NA	NA	NA	NA	NA	NA	NA	0	837	556	0	425	540	0	278	896	127	1656	560	421	1089	1990	1481
7737	957.81	618.396		NA	NA	NA	NA	NA	NA	NA	NA	968	489	876	547	630	1071	429	707	433	1061	624	372	567	678	580	825
10512	1062.66	307.287		NA	NA	NA	NA	NA	NA	NA	NA	773	624	533	590	1126	704	522	438	588	685	645	621	792	1133	550	535
7779	959.69	685.477		NA	NA	NA	NA	NA	NA	NA	NA	1008	1282	855	616	0	582	444	695	596	953	766	0	550	889	807	824
8645	1002.82	412.28		NA	NA	NA	NA	NA	NA	NA	NA	831	574	1165	508	676	0	722	654	518	569	1002	904	769	700	720	556
2841	53.21	861.83		NA	NA	NA	NA	NA	NA	NA	NA	665	0	662	731	853	922	528	661	0	780	764	689	903	1092	894	724
9257	1021.55	728.526		NA	NA	NA	NA	NA	NA	NA	NA	691	1022	500	707	554	735	592	919	824	854	567	606	608	615	366	710
10968	1078.04	438.35		NA	NA	NA	NA	NA	NA	NA	NA	1086	556	1053	524	452	523	527	631	0	560	704	932	1190	1092	505	540
696	252.72	96.0212		NA	NA	NA	NA	NA	NA	NA	NA	680	586	752	622	467	634	586	845	546	539	551	717	784	683	900	984
8856	1008.98	150.116		NA	NA	NA	NA	NA	NA	NA	NA	735	608	817	691	456	580	551	610	666	865	473	471	565	870	844	1081
7996	970.91	329.256		NA	NA	NA	NA	NA	NA	NA	NA	618	627	904	714	714	185	709	787	680	669	736	723	694	782	751	593
10166	1051.11	424.334		NA	NA	NA	NA	NA	NA	NA	NA	445	481	658	582	1025	864	559	628	0	988	807	602	850	999	936	471
1648	857.11	345.324		NA	NA	NA	NA	NA	NA	NA	NA	498	680	1375	811	516	1107	799	756	537	638	458	513	560	617	544	492
6063	735.88	348.19		NA	NA	NA	NA	NA	NA	NA	NA	413	358	481	560	1752	1780	366	438	306	1723	583	383	464	437	485	372
8580	998.24	156.002		NA	NA	NA	NA	NA	NA	NA	NA	443	741	450	812	419	634	656	698	796	732	504	671	699	689	1189	770
10602	1066.97	169.147		NA	NA	NA	NA	NA	NA	NA	NA	759	559	820	650	1032	612	715	620	623	497	572	600	755	712	702	681
10985	1079.14	110.073		NA	NA	NA	NA	NA	NA	NA	NA	884	679	961	689	902	696	437	564	770	561	422	727	556	637	735	691
707	254.32	337.109		NA	NA	NA	NA	NA	NA	NA	NA	350	575	376	573	1347	1655	530	482	347	1490	956	463	585	439	278	468
2617	51.41	417.907		NA	NA	NA	NA	NA	NA	NA	NA	532	651	692	712	779	698	668	610	508	662	648	832	708	648	738	837
1337	679.1	234.162		NA	NA	NA	NA	NA	NA	NA	NA	332	364	633	609	1179	1209	452	308	389	1285	813	843	1017	687	347	456
1462	766.14	243.256		NA	NA	NA	NA	NA	NA	NA	NA	970	749	679	799	443	814	293	1122	347	511	670	726	856	409	691	855
7703	955.92	640.439		NA	NA	NA	NA	NA	NA	NA	NA	856	486	733	696	681	1176	447	506	470	1177	577	427	655	549	632	870
1970	963.99	481.362		NA	NA	NA	NA	NA	NA	NA	NA	0	0	0	1019	937	1243	804	836	803	1082	0	887	844	1247	1243	0
10151	1052.41	127.101		NA	NA	NA	NA	NA	NA	NA	NA	611	662	842	618	773	603	608	556	554	899	646	814	667	698	628	777
6626	860.28	311.318		NA	NA	NA	NA	NA	NA	NA	NA	384	118	3226	106	102	109	94	112	617	139	2970	94	107	132	636	2016
845	283.92	323.14		NA	NA	NA	NA	NA	NA	NA	NA	521	404	1031	682	328	126	481	958	260	486	999	863	999	624	868	1332
1617	839.07	594.242		NA	NA	NA	NA	NA	NA	NA	NA	125	1259	1752	1726	135	1358	0	2269	216	1497	0	401	0	0	0	232
1508	787.66	382.148		NA	NA	NA	NA	NA	NA	NA	NA	0	624	788	787	887	266	818	689	836	592	790	1006	985	0	950	955
10297	1055.98	685.481		NA	NA	NA	NA	NA	NA	NA	NA	1527	0	1164	633	0	749	0	0	975	1650	1269	0	953	0	999	1057
1842	922.99	340.086		NA	NA	NA	NA	NA	NA	NA	NA	598	633	733	688	564	654	768	643	568	696	678	1005	689	599	782	678
3985	87.04	187.085		NA	NA	NA	NA	NA	NA	NA	NA	465	720	744	580	652	853	634	561	477	939	719	616	772	1041	611	593
7849	963	244.219		NA	NA	NA	NA	NA	NA	NA	NA	620	569	655	686	506	493	1065	587	695	804	712	598	622	891	1046	430
7106	909.81	771.499		NA	NA	NA	NA	NA	NA	NA	NA	0	883	0	638	67	612	966	888	1096	1208	0	505	696	1037	1237	1153
1266	622.87	325.098		NA	NA	NA	NA	NA	NA	NA	NA	599	558	561	735	855	1433	453	371	466	1306	668	597	660	590	423	713
6825	883.42	306.217		NA	NA	NA	NA	NA	NA	NA	NA	594	0	615	725	1346	1080	548	718	589	679	573	617	546	621	629	1110
7397	933.36	310.249		NA	NA	NA	NA	NA	NA	NA	NA	571	683	538	535	772	672	794	604	684	623	664	855	693	863	627	819
1588	830.93	239.092		NA	NA	NA	NA	NA	NA	NA	NA	891	700	1173	733	445	570	733	449	415	368	1142	844	607	646	574	711
8985	1010.09	549.381		NA	NA	NA	NA	NA	NA	NA	NA	627	841	708	820	464	969	433	592	371	986	861	1105	739	577	368	540
3793	61.77	159.091		NA	NA	NA	NA	NA	NA	NA	NA	0	1359	1060	1064	1142	1320	0	0	0	0	0	1049	1229	1190	0	1589
3306	57.27	270.957		NA	NA	NA	NA	NA	NA	NA	NA	542	0	0	549	857	992	543	1058	570	986	568	655	680	1012	1396	599
7175	917.62	192.151		NA	NA	NA	NA	NA	NA	NA	NA	655	703	752	764	730	802	587	596	603	617	703	756	762	686	575	718
4628	235.89	142.053		NA	NA	NA	NA	NA	NA	NA	NA	926	683	376	1042	282	325	826	395	398	372	1612	829	1085	629	753	476
7129	913.03	686.485		NA	NA	NA	NA	NA	NA	NA	NA	465	876	945	795	522	743	504	560	585	784	657	695	736	832	613	701
2281	1041.47	479.359		NA	NA	NA	NA	NA	NA	NA	NA	911	1030	1016	876	993	1003	0	1008	797	903	0	1069	586	0	0	826
1919	947.72	782.662		NA	NA	NA	NA	NA	NA	NA	NA	756	914	871	715	697	687	617	592	602	508	623	633	718	703	689	693
8983	1010.02	870.567		NA	NA	NA	NA	NA	NA	NA	NA	82	1764	222	416	57	592	302	1127	674	2048	242	403	1034	1431	627	0
7291	927.59	580.359		NA	NA	NA	NA	NA	NA	NA	NA	617	700	617	760	558	671	739	614	801	628	740	839	875	183	848	834
8572	997.11	426.35		NA	NA	NA	NA	NA	NA	NA	NA	572	470	830	781	1041	702	730	443	417	822	1131	572	536	638	777	565
7638	952.7	745.515		NA	NA	NA	NA	NA	NA	NA	NA	1067	706	876	572	552	1090	484	439	509	1095	709	482	558	577	537	776
4040	86.7	381.016		NA	NA	NA	NA	NA	NA	NA	NA	745	694	612	695	696	836	715	661	701	535	617	723	692	793	599	719
343	151.59	246.122		NA	NA	NA	NA	NA	NA	NA	NA	624	894	659	594	434	626	728	760	317	676	458	430	864	772	631	1568
5929	658.9	396.099		NA	NA	NA	NA	NA	NA	NA	NA	1891	443	905	670	283	309	538	254	229	308	546	1305	934	1210	271	939
3509	58.85	515.12		NA	NA	NA	NA	NA	NA	NA	NA	821	762	938	717	485	315	741	707	0	475	1234	555	904	1004	598	783
7319	929.31	260.887		NA	NA	NA	NA	NA	NA	NA	NA	725	750	856	728	567	637	591	746	588	571	808	650	725	624	647	833
7077	909.06	295.251		NA	NA	NA	NA	NA	NA	NA	NA	617	600	629	404	1001	1022	407	848	467	710	721	608	733	759	765	756
5281	295.18	196.073		NA	NA	NA	NA	NA	NA	NA	NA	481	643	711	889	373	1170	971	382	563	1143	626	566	648	549	504	832
2352	1051.82	884.483		NA	NA	NA	NA	NA	NA	NA	NA	1237	0	1301	0	0	0	913	1147	1288	1294	0	0	1286	0	1072	1515
6211	795.97	208.146		NA	NA	NA	NA	NA	NA	NA	NA	693	663	724	594	637	653	812	576	582	766	652	622	1009	708	684	678
2816	53.84	675.773		NA	NA	NA	NA	NA	NA	NA	NA	584	1324	858	664	613	807	1022	829	242	517	501	732	412	514	387	1050
3771	62.39	296.103		NA	NA	NA	NA	NA	NA	NA	NA	1548	1590	939	0	0	1371	0	738	747	0	904	782	726	717	95	904
6423	831.25	571.235		NA	NA	NA	NA	NA	NA	NA	NA	802	658	1095	631	460	502	773	370	511	399	971	845	943	729	648	724
7226	922.58	466.353		NA	NA	NA	NA	NA	NA	NA	NA	565	632	606	533	642	561	788	798	773	728	609	743	667	853	773	792
2325	1046.08	273.209		NA	NA	NA	NA	NA	NA	NA	NA	871	1181	466	532	387	498	805	731	245	397	958	385	1125	1552	525	408
1695	873.47	771.499		NA	NA	NA	NA	NA	NA	NA	NA	0	907	0	812	80	604	1077	882	851	1252	0	581	643	1028	1349	1003
6595	856.43	274.193		NA	NA	NA	NA	NA	NA	NA	NA	669	827	793	622	969	1084	532	454	448	1118	606	738	632	551	461	568
2966	53.82	743.76		NA	NA	NA	NA	NA	NA	NA	NA	692	1057	808	685	786	966	1219	847	0	645	488	788	531	0	463	1097
7166	915.86	310.25		NA	NA	NA	NA	NA	NA	NA	NA	691	750	639	681	808	656	640	765	757	648	542	920	658	649	563	711
274	62.76	372.098		NA	NA	NA	NA	NA	NA	NA	NA	817	677	837	728	768	976	622	543	428	934	636	652	784	664	509	508
9594	1032.29	566.436		NA	NA	NA	NA	NA	NA	NA	NA	853	758	871	771	855	779	485	819	814	886	0	861	501	527	486	824
3740	62.16	341.078		NA	NA	NA	NA	NA	NA	NA	NA	722	704	691	672	633	620	779	805	283	778	1531	769	632	524	370	577
1372	706.54	172.089		NA	NA	NA	NA	NA	NA	NA	NA	543	499	588	626	702	518	711	762	774	700	776	615	782	845	799	851
8959	1009.86	599.497		NA	NA	NA	NA	NA	NA	NA	NA	864	685	555	0	517	508	0	649	623	1048	1427	627	1327	898	739	628
5796	566.99	159.069		NA	NA	NA	NA	NA	NA	NA	NA	1367	426	969	577	419	404	607	211	163	472	427	746	1043	1584	435	1247
22	50.05	1117.77		NA	NA	NA	NA	NA	NA	NA	NA	918	989	1104	0	0	1514	1049	942	638	1166	0	0	1371	1412	0	0
5927	657.98	218.167		NA	NA	NA	NA	NA	NA	NA	NA	448	1240	1135	630	290	521	733	969	558	438	834	920	589	284	643	875
11096	826.84	468.273		NA	NA	NA	NA	NA	NA	NA	NA	692	856	921	704	638	878	654	636	465	844	532	759	558	727	672	574
6250	812.21	270.182		NA	NA	NA	NA	NA	NA	NA	NA	715	786	632	828	689	583	691	641	607	724	701	832	608	651	704	719
429	212.8	406.148		NA	NA	NA	NA	NA	NA	NA	NA	531	613	764	699	816	1034	642	908	0	794	836	626	974	862	0	1012
374	181.6	428.125		NA	NA	NA	NA	NA	NA	NA	NA	560	1543	610	609	987	585	463	534	451	484	1012	508	823	802	513	630
6547	847.15	330.181		NA	NA	NA	NA	NA	NA	NA	NA	468	431	462	492	1717	1868	257	531	389	1522	498	505	446	385	635	518
4838	251.93	369.106		NA	NA	NA	NA	NA	NA	NA	NA	674	753	993	580	461	507	275	785	599	408	1477	362	1057	956	667	571
10973	1078.92	96.0578		NA	NA	NA	NA	NA	NA	NA	NA	680	600	1004	669	659	661	525	618	924	629	659	682	543	703	747	823
7513	942.1	480.363		NA	NA	NA	NA	NA	NA	NA	NA	523	550	513	519	525	546	856	316	482	501	1121	714	565	1518	1264	617
1445	756.52	218.167		NA	NA	NA	NA	NA	NA	NA	NA	1369	1292	1165	300	238	172	522	325	342	297	0	566	813	1437	1272	1021
2675	52.85	571.841		NA	NA	NA	NA	NA	NA	NA	NA	578	737	778	746	443	808	598	921	0	600	583	977	690	889	760	1025
3794	61.81	336.115		NA	NA	NA	NA	NA	NA	NA	NA	893	786	634	677	525	668	1062	612	0	777	525	959	770	717	660	871
2442	1068.77	463.375		NA	NA	NA	NA	NA	NA	NA	NA	0	819	1091	1210	602	2204	0	1053	1016	1577	0	819	0	0	0	751
9681	1034.84	414.349		NA	NA	NA	NA	NA	NA	NA	NA	958	515	480	849	1327	882	617	500	246	278	2388	238	650	0	593	621
8703	1005.22	584.434		NA	NA	NA	NA	NA	NA	NA	NA	800	899	1027	987	724	979	0	970	1097	1198	0	857	606	0	0	1009
1406	734.16	335.167		NA	NA	NA	NA	NA	NA	NA	NA	1835	636	344	106	211	382	193	267	160	517	442	104	685	2613	1096	1563
7813	961.32	475.302		NA	NA	NA	NA	NA	NA	NA	NA	750	574	649	719	592	672	811	519	556	695	1226	1017	532	580	640	624
2122	1003.23	323.317		NA	NA	NA	NA	NA	NA	NA	NA	697	584	784	985	554	533	579	823	455	651	861	533	484	583	541	1517
10132	1050.75	460.354		NA	NA	NA	NA	NA	NA	NA	NA	444	588	567	561	980	754	658	584	567	720	740	561	802	1020	1093	527
7494	941.33	318.277		NA	NA	NA	NA	NA	NA	NA	NA	627	585	797	551	588	589	743	789	618	763	861	717	271	919	959	794
7608	949.29	711.487		NA	NA	NA	NA	NA	NA	NA	NA	815	0	428	304	771	472	562	567	684	689	859	702	735	881	1835	869
4010	87.13	161.069		NA	NA	NA	NA	NA	NA	NA	NA	540	875	694	728	700	829	795	652	420	820	786	696	624	619	711	689
7803	961.24	530.344		NA	NA	NA	NA	NA	NA	NA	NA	1023	225	834	515	624	887	565	680	522	1067	725	579	662	590	775	907
3821	62.26	499.094		NA	NA	NA	NA	NA	NA	NA	NA	710	753	630	784	564	113	753	64	672	638	787	630	1000	904	1219	960
4657	237.61	408.104		NA	NA	NA	NA	NA	NA	NA	NA	1232	0	769	0	1471	1064	0	1281	1096	1065	0	0	1102	1100	0	1002
2503	38.07	193.111		NA	NA	NA	NA	NA	NA	NA	NA	664	675	729	665	928	621	687	625	646	742	763	679	712	760	649	640
2242	1028.61	592.27		NA	NA	NA	NA	NA	NA	NA	NA	575	880	1297	1539	473	623	441	1908	571	1051	201	627	301	150	239	312
8234	983.15	400.282		NA	NA	NA	NA	NA	NA	NA	NA	0	405	1979	856	1343	812	394	574	266	731	767	1051	556	528	290	636
3253	58.41	654.16		NA	NA	NA	NA	NA	NA	NA	NA	211	321	509	465	991	579	305	693	697	376	577	417	1409	1423	1507	710
1872	933.68	246.161		NA	NA	NA	NA	NA	NA	NA	NA	806	659	799	639	935	744	846	518	698	573	826	585	518	741	737	571
10168	1051.2	208.126		NA	NA	NA	NA	NA	NA	NA	NA	882	577	683	650	969	767	574	755	883	784	459	811	618	650	425	711
6503	842.37	599.232		NA	NA	NA	NA	NA	NA	NA	NA	762	827	1093	939	581	567	720	528	418	510	860	749	804	544	578	722
3092	54.72	877.765		NA	NA	NA	NA	NA	NA	NA	NA	922	488	859	800	951	884	0	1249	701	0	858	895	858	825	913	0
8066	975.52	246.232		NA	NA	NA	NA	NA	NA	NA	NA	0	727	846	800	812	905	483	805	0	786	856	528	933	903	943	885
6675	867.06	332.128		NA	NA	NA	NA	NA	NA	NA	NA	710	584	674	620	1521	1603	393	502	278	1243	499	576	605	499	466	444
9928	1044.27	206.152		NA	NA	NA	NA	NA	NA	NA	NA	572	635	749	609	613	635	851	654	597	604	812	540	919	722	1085	622
1290	642.62	322.008		NA	NA	NA	NA	NA	NA	NA	NA	576	814	576	243	1069	1972	255	551	315	2268	576	271	352	391	460	531
3136	55.58	553.764		NA	NA	NA	NA	NA	NA	NA	NA	693	850	711	689	968	981	1056	812	334	831	703	642	0	723	508	721
9206	1018.56	434.282		NA	NA	NA	NA	NA	NA	NA	NA	497	768	822	897	624	637	778	752	0	573	684	991	862	702	742	893
2611	51.06	365.944		NA	NA	NA	NA	NA	NA	NA	NA	716	677	666	722	737	1006	767	665	380	625	728	778	778	697	669	614
2431	1067.65	199.157		NA	NA	NA	NA	NA	NA	NA	NA	807	730	739	676	982	797	675	727	653	710	595	598	591	686	597	671
831	276.82	261.991		NA	NA	NA	NA	NA	NA	NA	NA	734	1287	409	1198	418	1132	974	619	394	1092	615	553	447	302	383	678
9268	1019.7	454.273		NA	NA	NA	NA	NA	NA	NA	NA	1067	349	859	865	628	671	746	428	428	892	717	548	559	682	949	848
2310	1044.38	625.47		NA	NA	NA	NA	NA	NA	NA	NA	1325	0	1316	1049	1268	1171	216	1061	1083	1093	0	0	126	258	206	1078
6326	821.85	460.282		NA	NA	NA	NA	NA	NA	NA	NA	414	542	886	645	1209	861	255	662	628	633	812	858	879	665	725	576
7587	947.87	400.274		NA	NA	NA	NA	NA	NA	NA	NA	735	837	732	547	287	646	702	919	762	1139	405	625	889	758	526	742
10473	1061.44	124.125		NA	NA	NA	NA	NA	NA	NA	NA	660	433	502	537	1651	1641	462	0	485	1810	448	580	498	517	566	467
8057	974.59	298.286		NA	NA	NA	NA	NA	NA	NA	NA	528	423	944	969	600	1097	461	853	588	502	991	478	537	462	1318	512
2032	980.72	642.523		NA	NA	NA	NA	NA	NA	NA	NA	1330	817	656	0	571	231	1445	0	300	1529	0	659	347	1526	232	1627
2172	1010.21	809.522		NA	NA	NA	NA	NA	NA	NA	NA	585	963	878	1053	451	640	703	894	421	580	691	736	735	690	692	562
7777	959.49	290.187		NA	NA	NA	NA	NA	NA	NA	NA	601	650	566	483	1930	1359	510	402	462	1268	493	469	528	555	535	473
1979	967.44	1154.68		NA	NA	NA	NA	NA	NA	NA	NA	362	1172	2243	1286	0	1947	0	1965	307	1241	0	408	0	0	0	353
3929	72.86	293.828		NA	NA	NA	NA	NA	NA	NA	NA	598	834	725	614	771	798	691	652	538	852	847	648	664	644	647	764
6422	831.44	639.224		NA	NA	NA	NA	NA	NA	NA	NA	689	748	1225	774	426	410	588	389	422	468	1269	912	752	732	763	721
10717	1072.95	174.14		NA	NA	NA	NA	NA	NA	NA	NA	704	775	767	682	900	824	534	603	749	513	700	919	664	717	564	674
6600	856.9	224.124		NA	NA	NA	NA	NA	NA	NA	NA	697	637	734	668	693	690	809	689	759	627	695	695	706	659	796	737
4176	181.44	198.053		NA	NA	NA	NA	NA	NA	NA	NA	416	393	729	670	786	760	456	536	412	440	1155	465	1234	1074	866	899
1048	408.49	588.152		NA	NA	NA	NA	NA	NA	NA	NA	1539	752	636	935	431	231	781	705	542	210	1385	847	484	554	566	705
4070	89.55	240.148		NA	NA	NA	NA	NA	NA	NA	NA	463	688	573	850	727	875	652	571	514	776	778	842	692	896	750	657
1365	700.97	219.089		NA	NA	NA	NA	NA	NA	NA	NA	435	1036	494	1072	318	664	1114	423	488	755	1074	1324	562	569	352	625
11067	831.08	499.306		NA	NA	NA	NA	NA	NA	NA	NA	606	775	1576	949	367	415	643	520	389	474	1341	818	714	526	619	577
4369	217.39	264.063		NA	NA	NA	NA	NA	NA	NA	NA	632	540	653	992	1011	686	646	876	436	497	1093	645	422	354	887	947
1549	815.1	459.165		NA	NA	NA	NA	NA	NA	NA	NA	1091	984	799	717	803	1008	791	695	684	633	676	499	680	518	134	606
2374	1057.75	655.495		NA	NA	NA	NA	NA	NA	NA	NA	671	769	694	715	1007	808	651	627	767	712	652	663	647	607	572	757
6035	715.71	334.2		NA	NA	NA	NA	NA	NA	NA	NA	574	675	711	589	721	627	521	584	677	924	716	704	872	664	855	906
7496	942.29	260.887		NA	NA	NA	NA	NA	NA	NA	NA	719	703	859	684	737	648	776	602	604	532	670	640	899	826	757	665
6756	876.15	299.282		NA	NA	NA	NA	NA	NA	NA	NA	810	790	894	691	1138	1103	472	859	419	900	442	659	413	522	513	700
2329	1047.02	751.538		NA	NA	NA	NA	NA	NA	NA	NA	1760	0	0	899	496	932	0	0	168	986	0	4182	0	0	1214	698
2873	55.19	797.702		NA	NA	NA	NA	NA	NA	NA	NA	0	1318	0	1215	1282	1481	1314	1139	217	1136	0	1050	0	0	0	1191
9611	1032.43	174.141		NA	NA	NA	NA	NA	NA	NA	NA	650	782	670	783	694	730	585	698	591	804	684	782	772	688	607	824
1443	755.77	533.312		NA	NA	NA	NA	NA	NA	NA	NA	710	615	1236	1450	547	634	852	641	422	631	731	556	519	616	630	555
8689	1003.59	284.289		NA	NA	NA	NA	NA	NA	NA	NA	609	661	685	680	878	794	709	701	724	629	736	861	753	679	684	564
3838	62.38	226.085		NA	NA	NA	NA	NA	NA	NA	NA	1155	719	551	749	1066	901	657	596	445	943	855	434	567	784	495	438
5129	270.5	214.118		NA	NA	NA	NA	NA	NA	NA	NA	666	711	773	631	761	634	605	700	719	692	859	701	806	775	675	649
1144	481.99	485.284		NA	NA	NA	NA	NA	NA	NA	NA	742	587	770	649	704	713	673	626	783	855	673	638	688	718	783	756
8053	974.27	250.18		NA	NA	NA	NA	NA	NA	NA	NA	792	840	718	732	723	723	723	789	539	767	0	746	927	686	849	806
7595	946.3	744.491		NA	NA	NA	NA	NA	NA	NA	NA	0	929	566	1170	674	1054	577	526	859	928	1011	699	611	378	528	851
6311	818.2	351.22		NA	NA	NA	NA	NA	NA	NA	NA	413	1382	545	417	1264	2927	384	310	119	1913	321	493	0	0	264	610
9066	1012.51	714.505		NA	NA	NA	NA	NA	NA	NA	NA	663	453	319	444	0	1316	266	1172	858	272	438	853	1198	906	1578	634
9783	1038.73	162.141		NA	NA	NA	NA	NA	NA	NA	NA	630	736	799	789	792	718	642	692	726	838	640	701	545	656	714	752
8500	995.05	749.495		NA	NA	NA	NA	NA	NA	NA	NA	866	794	816	644	871	695	647	731	664	562	640	887	608	589	689	682
3365	57.95	432.086		NA	NA	NA	NA	NA	NA	NA	NA	707	500	893	786	482	496	1169	775	725	440	650	898	818	772	756	520
9545	1029.26	705.459		NA	NA	NA	NA	NA	NA	NA	NA	425	716	375	600	2519	1463	319	890	179	1111	477	599	432	493	421	369
9540	1029.06	113.954		NA	NA	NA	NA	NA	NA	NA	NA	799	1023	764	698	672	752	588	929	823	811	630	781	408	491	461	759
10066	1048.72	164.12		NA	NA	NA	NA	NA	NA	NA	NA	625	659	643	673	811	1053	768	662	499	918	598	716	682	734	651	698
7035	904.39	160.098		NA	NA	NA	NA	NA	NA	NA	NA	769	695	775	723	0	955	811	677	700	720	0	934	831	842	893	1072
1464	769.07	442.225		NA	NA	NA	NA	NA	NA	NA	NA	685	498	613	662	808	916	487	503	544	783	793	697	923	932	495	1063
1627	841.26	437.254		NA	NA	NA	NA	NA	NA	NA	NA	598	536	502	842	689	759	1527	766	460	576	696	1353	519	395	533	652
9825	1041.06	136.125		NA	NA	NA	NA	NA	NA	NA	NA	738	1043	736	632	854	786	490	1087	844	974	425	700	492	426	409	770
3804	62.08	179.026		NA	NA	NA	NA	NA	NA	NA	NA	475	759	836	872	637	713	714	1081	467	600	744	622	667	591	533	1095
7353	932.24	488.147		NA	NA	NA	NA	NA	NA	NA	NA	773	829	1129	1036	412	466	864	493	475	609	859	714	673	724	700	653
20	49.92	857.855		NA	NA	NA	NA	NA	NA	NA	NA	684	905	780	940	1039	1174	966	775	417	0	814	767	1182	0	0	967
2479	1079.92	308.289		NA	NA	NA	NA	NA	NA	NA	NA	509	621	846	581	534	527	820	543	735	862	605	614	1503	740	871	504
3808	62.13	248.053		NA	NA	NA	NA	NA	NA	NA	NA	584	725	660	873	651	833	622	718	432	967	765	555	723	627	759	921
4031	87	735.096		NA	NA	NA	NA	NA	NA	NA	NA	1072	1062	1008	1056	375	396	1421	844	244	439	541	682	687	690	197	704
6332	821.54	479.3		NA	NA	NA	NA	NA	NA	NA	NA	827	658	1037	684	780	677	532	646	388	528	971	1006	733	556	815	582
4448	223.74	309.125		NA	NA	NA	NA	NA	NA	NA	NA	1031	1456	743	594	106	241	957	830	331	305	643	885	554	673	423	1653
8963	1009.88	178.172		NA	NA	NA	NA	NA	NA	NA	NA	769	742	896	623	756	862	636	737	576	847	563	665	749	528	726	752
2045	983.68	414.029		NA	NA	NA	NA	NA	NA	NA	NA	550	1226	1294	561	240	133	886	646	345	190	1426	1511	672	366	643	740
3393	58.17	519.118		NA	NA	NA	NA	NA	NA	NA	NA	573	605	552	493	492	642	846	861	444	668	434	852	976	910	1167	918
5827	594.26	159.069		NA	NA	NA	NA	NA	NA	NA	NA	1708	619	1392	740	394	388	689	220	0	0	611	1143	929	984	514	1102
3729	62.3	457.125		NA	NA	NA	NA	NA	NA	NA	NA	911	873	1293	969	683	690	435	718	625	783	634	385	785	657	0	993
5755	477.29	192.078		NA	NA	NA	NA	NA	NA	NA	NA	919	389	1721	1139	550	634	736	371	0	458	976	687	1298	882	487	189
6755	876.72	292.166		NA	NA	NA	NA	NA	NA	NA	NA	773	684	888	759	629	610	693	691	610	735	696	607	811	773	834	647
7843	962.34	424.282		NA	NA	NA	NA	NA	NA	NA	NA	1152	1416	1615	1593	725	0	620	0	494	1256	384	535	370	397	282	602
10161	1052.27	190.172		NA	NA	NA	NA	NA	NA	NA	NA	675	626	689	724	690	679	706	611	688	845	775	711	797	775	799	659
8482	992.97	613.271		NA	NA	NA	NA	NA	NA	NA	NA	0	1192	0	1104	0	798	823	703	1441	1210	0	211	657	871	1283	1164
3725	62.49	94.0672		NA	NA	NA	NA	NA	NA	NA	NA	850	609	598	754	867	808	977	672	408	763	665	735	728	654	644	726
5135	271.68	517.145		NA	NA	NA	NA	NA	NA	NA	NA	1226	354	1367	87	0	732	313	961	233	754	671	774	1327	1105	862	692
6783	878.24	1066.58		NA	NA	NA	NA	NA	NA	NA	NA	393	413	1214	311	1405	966	0	438	292	631	775	908	1105	862	1101	646
1157	501.65	455.089		NA	NA	NA	NA	NA	NA	NA	NA	867	315	857	607	427	361	177	953	259	239	637	373	864	817	2658	1054
1519	795.8	395.244		NA	NA	NA	NA	NA	NA	NA	NA	915	841	885	886	646	715	973	736	420	637	458	833	433	572	733	786
6703	870.41	497.252		NA	NA	NA	NA	NA	NA	NA	NA	597	710	934	933	708	755	650	605	403	519	822	815	913	764	629	714
3366	57.78	330.102		NA	NA	NA	NA	NA	NA	NA	NA	1352	997	934	757	429	703	393	838	391	625	438	524	691	497	518	1392
787	264.78	221.038		NA	NA	NA	NA	NA	NA	NA	NA	407	1417	213	573	230	731	349	1002	175	1011	744	497	1303	1257	728	843
10568	1066.77	492.368		NA	NA	NA	NA	NA	NA	NA	NA	735	742	723	759	789	915	548	626	666	815	747	826	685	599	584	724
8561	997.02	870.567		NA	NA	NA	NA	NA	NA	NA	NA	126	1879	81	421	71	0	393	1391	826	2393	301	349	1052	1477	665	61
9720	1036.74	597.48		NA	NA	NA	NA	NA	NA	NA	NA	0	912	0	0	1004	0	1145	1077	1643	0	697	1098	728	0	1889	1301
9616	1032.6	175.138		NA	NA	NA	NA	NA	NA	NA	NA	700	743	776	670	625	736	679	734	671	566	706	686	795	776	779	857
959	343	435.216		NA	NA	NA	NA	NA	NA	NA	NA	530	821	2602	754	602	1224	543	431	0	1252	573	537	622	613	0	397
1880	934.71	251.188		NA	NA	NA	NA	NA	NA	NA	NA	590	690	979	663	898	1131	609	448	432	633	697	609	996	709	725	702
6784	878.17	1084.55		NA	NA	NA	NA	NA	NA	NA	NA	400	454	1229	474	1508	1079	107	487	404	575	897	634	960	678	1179	449
10446	1060.7	150.117		NA	NA	NA	NA	NA	NA	NA	NA	602	770	784	588	1025	781	597	828	688	802	736	620	684	698	695	617
6353	821.97	224.124		NA	NA	NA	NA	NA	NA	NA	NA	1006	672	696	666	660	726	689	709	674	741	695	655	736	683	744	764
2441	1068.74	679.612		NA	NA	NA	NA	NA	NA	NA	NA	117	1383	168	266	188	168	167	134	228	1420	1354	2083	94	1467	588	1698
2874	55.27	729.715		NA	NA	NA	NA	NA	NA	NA	NA	0	1181	1115	1440	1324	1451	1377	1201	0	0	0	1111	0	0	0	1335
3485	58.71	278.112		NA	NA	NA	NA	NA	NA	NA	NA	864	618	935	879	718	861	759	421	383	737	516	624	672	737	661	1151
361	172.8	291.194		NA	NA	NA	NA	NA	NA	NA	NA	747	3164	877	803	812	629	389	638	0	414	651	520	817	647	0	433
936	323.76	638.252		NA	NA	NA	NA	NA	NA	NA	NA	849	384	539	934	238	529	696	733	521	436	1131	937	1467	1333	494	321
2457	1074.55	176.047		NA	NA	NA	NA	NA	NA	NA	NA	876	1087	1088	864	597	748	626	652	764	696	448	717	787	635	545	413
7127	912.89	256.204		NA	NA	NA	NA	NA	NA	NA	NA	635	724	573	608	1103	1100	724	677	564	1132	586	612	730	456	637	682
10004	1047.16	687.494		NA	NA	NA	NA	NA	NA	NA	NA	299	884	791	766	812	821	854	690	655	721	493	838	804	751	611	755
1809	915.48	659.483		NA	NA	NA	NA	NA	NA	NA	NA	706	725	643	606	859	656	757	593	710	664	653	890	607	796	917	766
4988	260.17	366.096		NA	NA	NA	NA	NA	NA	NA	NA	827	914	0	825	757	810	1012	913	107	968	769	555	1082	383	996	631
8866	1009.15	739.515		NA	NA	NA	NA	NA	NA	NA	NA	826	660	503	477	481	940	575	845	874	584	429	454	1074	850	1014	969
2555	50.46	558.885		NA	NA	NA	NA	NA	NA	NA	NA	1027	0	0	1238	1356	0	0	0	0	0	1192	1219	1480	1306	1501	1238
10451	1060.87	600.51		NA	NA	NA	NA	NA	NA	NA	NA	358	600	677	622	1364	1049	769	468	446	1011	542	813	756	693	641	750
10631	1067.48	120.094		NA	NA	NA	NA	NA	NA	NA	NA	815	611	963	732	1364	748	580	722	708	653	559	737	558	672	544	595
3972	87.06	293.093		NA	NA	NA	NA	NA	NA	NA	NA	816	933	1570	1191	530	529	576	835	316	679	507	614	552	604	432	877
1702	877.96	276.632		NA	NA	NA	NA	NA	NA	NA	NA	610	432	814	637	988	848	381	554	550	565	852	696	1116	854	924	741
6221	802.09	602.331		NA	NA	NA	NA	NA	NA	NA	NA	756	762	672	691	630	683	878	678	664	764	963	806	495	779	739	603
7782	959.86	277.24		NA	NA	NA	NA	NA	NA	NA	NA	677	536	774	638	1483	1159	468	689	527	1075	496	301	818	564	693	668
8102	977.51	369.288		NA	NA	NA	NA	NA	NA	NA	NA	781	620	955	492	885	796	555	619	527	745	769	1154	717	727	510	715
8682	1003.91	384.146		NA	NA	NA	NA	NA	NA	NA	NA	1055	664	777	479	789	735	682	598	564	713	912	888	813	569	636	695
7459	940.85	539.286		NA	NA	NA	NA	NA	NA	NA	NA	0	550	766	918	1015	728	750	832	986	739	1013	972	827	667	248	559
1696	873.95	104.027		NA	NA	NA	NA	NA	NA	NA	NA	630	626	811	747	784	717	734	649	755	674	696	826	694	807	748	675
7801	962.51	348.266		NA	NA	NA	NA	NA	NA	NA	NA	652	915	478	666	705	849	837	674	662	811	566	678	499	632	1234	716
9560	1029.94	124.125		NA	NA	NA	NA	NA	NA	NA	NA	903	784	778	877	881	771	559	759	752	926	482	758	491	549	468	842
6078	745.16	266.261		NA	NA	NA	NA	NA	NA	NA	NA	282	1250	1140	1104	0	1376	1598	1347	179	1331	1264	253	259	0	203	0
10616	1067.58	110.073		NA	NA	NA	NA	NA	NA	NA	NA	1101	657	912	768	1262	860	488	565	657	699	568	579	582	715	550	625
2494	20.8	157.954		NA	NA	NA	NA	NA	NA	NA	NA	644	743	715	824	788	718	720	759	594	658	687	750	794	738	727	729
9246	1019.32	410.196		NA	NA	NA	NA	NA	NA	NA	NA	903	754	904	708	893	981	711	706	386	1061	649	885	538	523	422	564
156	59.78	664.113		NA	NA	NA	NA	NA	NA	NA	NA	727	947	1087	784	571	688	756	569	608	908	698	841	413	648	625	728
2593	50.52	463.912		NA	NA	NA	NA	NA	NA	NA	NA	632	724	785	751	827	744	820	647	510	645	667	946	812	761	635	692
5642	391.85	398.136		NA	NA	NA	NA	NA	NA	NA	NA	521	1546	1567	851	747	865	337	255	396	747	660	287	1186	963	82	597
9454	1028.33	566.408		NA	NA	NA	NA	NA	NA	NA	NA	1087	1105	876	1119	980	1012	428	857	1033	1046	0	1042	0	0	0	1024
1457	763.81	411.226		NA	NA	NA	NA	NA	NA	NA	NA	389	971	579	946	376	571	861	627	429	303	641	1301	766	617	1095	1145
9391	1026.54	334.144		NA	NA	NA	NA	NA	NA	NA	NA	958	753	900	777	925	993	670	800	584	831	549	930	0	675	656	622
1403	733.24	488.26		NA	NA	NA	NA	NA	NA	NA	NA	592	704	689	717	609	707	732	636	658	842	679	800	659	652	933	1015
3748	62	224.053		NA	NA	NA	NA	NA	NA	NA	NA	366	795	567	854	381	583	811	707	555	565	854	768	1013	829	1132	854
1905	942.25	499.387		NA	NA	NA	NA	NA	NA	NA	NA	494	414	1418	481	350	494	264	637	498	592	658	610	1078	1005	1946	697
9161	1017.94	386.302		NA	NA	NA	NA	NA	NA	NA	NA	691	692	700	683	890	941	685	624	688	897	807	615	697	771	675	586
56	52.2	155.07	L-Histidine	NA	NA	NA	NA	NA	NA	NA	NA	640	582	1126	734	538	459	772	1007	370	396	487	557	1049	938	716	1274
1188	565.74	250.077		NA	NA	NA	NA	NA	NA	NA	NA	1016	578	807	541	352	384	473	582	342	364	986	465	886	1945	1117	809
3104	54.88	783.771		NA	NA	NA	NA	NA	NA	NA	NA	894	0	885	835	805	974	901	843	0	924	953	845	563	769	679	780
9051	1012.26	628.419		NA	NA	NA	NA	NA	NA	NA	NA	402	428	549	903	1527	1190	425	691	403	1082	594	564	711	630	895	657
5387	319.3	234.089		NA	NA	NA	NA	NA	NA	NA	NA	711	927	562	514	640	949	531	624	478	857	726	464	1104	891	683	995
8187	980.92	250.189		NA	NA	NA	NA	NA	NA	NA	NA	836	732	982	753	810	769	1012	856	742	936	0	908	838	683	800	0
3315	57.28	103.986		NA	NA	NA	NA	NA	NA	NA	NA	672	677	1074	1081	831	516	549	874	441	753	910	539	793	583	507	857
1335	678.54	345.251		NA	NA	NA	NA	NA	NA	NA	NA	557	556	581	618	0	1669	423	365	403	1732	881	1182	851	1019	281	539
140	59.07	315.044		NA	NA	NA	NA	NA	NA	NA	NA	603	719	813	769	942	1250	659	692	450	910	676	728	619	513	703	614
6641	863.13	352.26		NA	NA	NA	NA	NA	NA	NA	NA	793	648	697	527	1134	1427	516	568	541	1562	530	546	470	467	496	739
5517	344.24	507.21		NA	NA	NA	NA	NA	NA	NA	NA	795	1053	635	936	331	652	734	592	628	658	690	701	1265	968	649	379
6265	813.88	449.254		NA	NA	NA	NA	NA	NA	NA	NA	759	567	950	920	410	572	972	723	511	388	922	997	844	819	584	731
9808	1039.98	574.403		NA	NA	NA	NA	NA	NA	NA	NA	857	0	565	0	869	461	1055	989	850	493	974	920	1066	856	1111	604
34	50.63	1341.67		NA	NA	NA	NA	NA	NA	NA	NA	599	703	681	622	656	832	814	665	486	730	678	787	890	766	872	890
10482	1061.74	576.508		NA	NA	NA	NA	NA	NA	NA	NA	671	689	632	618	0	917	826	730	628	1001	615	925	838	950	875	758
5000	263.14	537.222		NA	NA	NA	NA	NA	NA	NA	NA	966	570	451	863	341	276	873	591	1158	186	1218	947	807	891	862	675
1367	701.66	386.198		NA	NA	NA	NA	NA	NA	NA	NA	668	528	434	525	1273	1436	452	300	429	1608	775	904	636	600	465	646
4291	209.29	448.031		NA	NA	NA	NA	NA	NA	NA	NA	862	616	651	839	748	549	808	628	342	542	1487	905	269	336	969	1132
2933	53.82	565.818		NA	NA	NA	NA	NA	NA	NA	NA	870	885	703	1094	634	1174	774	409	0	927	855	673	0	983	832	879
1411	737.99	210.125		NA	NA	NA	NA	NA	NA	NA	NA	389	400	637	595	1488	1822	516	493	426	1526	499	644	523	598	630	508
1982	967.67	455.413		NA	NA	NA	NA	NA	NA	NA	NA	519	889	678	555	546	826	417	549	465	683	455	1173	970	945	920	1105
3711	61.29	172.085		NA	NA	NA	NA	NA	NA	NA	NA	891	911	670	844	1003	1281	658	606	345	1187	592	521	601	579	436	572
3548	59.99	160.085		NA	NA	NA	NA	NA	NA	NA	NA	785	772	943	808	543	755	895	756	384	527	437	697	692	799	814	1093
7632	951.91	539.286		NA	NA	NA	NA	NA	NA	NA	NA	485	567	834	830	895	775	679	920	899	742	988	853	781	642	319	493
4253	200.98	283.142		NA	NA	NA	NA	NA	NA	NA	NA	1436	960	871	665	410	592	574	649	297	498	904	408	904	1212	368	961
4727	241.21	212.105		NA	NA	NA	NA	NA	NA	NA	NA	896	805	802	927	431	417	468	872	954	357	788	491	999	936	711	856
7153	915.81	412.248		NA	NA	NA	NA	NA	NA	NA	NA	721	830	713	673	732	664	628	702	808	719	733	741	719	809	837	683
7695	954.73	272.174		NA	NA	NA	NA	NA	NA	NA	NA	639	760	708	573	689	635	608	741	747	812	846	822	846	823	757	706
3993	87.19	228.147		NA	NA	NA	NA	NA	NA	NA	NA	406	521	675	677	764	1188	459	574	582	1175	840	912	800	778	618	748
4903	257.04	444.154		NA	NA	NA	NA	NA	NA	NA	NA	355	615	958	639	602	587	536	606	393	689	748	794	1297	1111	999	788
6981	898.1	507.336		NA	NA	NA	NA	NA	NA	NA	NA	600	771	733	686	884	800	513	687	534	714	888	1007	751	814	736	610
5848	611.66	338.115		NA	NA	NA	NA	NA	NA	NA	NA	268	300	555	783	1010	638	3074	1037	199	383	721	757	515	678	503	316
9939	1044.74	476.349		NA	NA	NA	NA	NA	NA	NA	NA	1177	957	804	1121	938	1073	0	811	1076	1271	0	1085	0	0	254	1175
3515	59.1	190.096		NA	NA	NA	NA	NA	NA	NA	NA	669	760	1216	712	662	1061	515	730	411	1094	651	403	550	568	886	861
2935	53.31	841.767		NA	NA	NA	NA	NA	NA	NA	NA	1032	1108	991	945	905	0	1171	1051	211	1030	863	1018	0	0	0	1424
7881	964.63	199.965		NA	NA	NA	NA	NA	NA	NA	NA	749	643	580	614	740	656	944	601	655	613	1040	785	733	770	815	823
8051	974.1	429.287		NA	NA	NA	NA	NA	NA	NA	NA	497	837	1477	617	902	701	741	888	550	943	448	584	907	570	466	633
4182	181.43	307.126		NA	NA	NA	NA	NA	NA	NA	NA	626	0	6410	0	0	0	0	0	487	0	1592	0	738	710	330	876
9169	1018.21	408.374		NA	NA	NA	NA	NA	NA	NA	NA	437	594	485	1328	358	524	1672	485	457	1928	354	2788	0	0	0	359
3354	58.4	312.044		NA	NA	NA	NA	NA	NA	NA	NA	292	370	634	491	764	644	252	758	837	390	546	533	1337	1619	1479	825
927	323.59	1598.53		NA	NA	NA	NA	NA	NA	NA	NA	803	343	536	1483	230	230	742	461	313	428	1327	892	2077	1647	266	0
1716	883.41	166.027		NA	NA	NA	NA	NA	NA	NA	NA	609	707	698	612	748	701	739	863	741	594	795	764	877	821	704	807
2020	975.66	411.386		NA	NA	NA	NA	NA	NA	NA	NA	484	680	694	559	586	681	550	551	583	726	588	640	1113	1040	1198	1108
8149	978.33	310.303		NA	NA	NA	NA	NA	NA	NA	NA	684	654	823	617	750	527	819	657	687	733	911	777	670	761	971	743
7985	971.26	540.328		NA	NA	NA	NA	NA	NA	NA	NA	487	427	1537	466	1465	991	147	676	553	764	779	789	784	659	694	567
170	60.39	216.044		NA	NA	NA	NA	NA	NA	NA	NA	1533	0	0	0	1482	0	2782	2222	0	0	0	2462	0	0	1306	0
10896	1076.8	376.275		NA	NA	NA	NA	NA	NA	NA	NA	1111	790	784	848	1714	1184	225	706	1101	725	0	1374	0	0	0	1231
8568	997.09	687.499		NA	NA	NA	NA	NA	NA	NA	NA	0	811	764	706	0	1118	1636	520	723	804	823	0	1267	1236	642	746
1804	914.29	456.271		NA	NA	NA	NA	NA	NA	NA	NA	826	785	680	667	728	582	651	729	700	761	683	728	782	740	894	861
2182	1010.84	140.084		NA	NA	NA	NA	NA	NA	NA	NA	709	888	660	984	686	717	767	578	554	884	676	698	881	747	679	690
10188	1051.94	247.136		NA	NA	NA	NA	NA	NA	NA	NA	762	699	594	718	864	720	817	715	656	779	718	750	732	782	733	761
6102	757.47	186.08		NA	NA	NA	NA	NA	NA	NA	NA	930	349	917	634	606	1116	480	0	259	882	664	879	1042	1887	366	795
6254	812.86	299.282		NA	NA	NA	NA	NA	NA	NA	NA	509	807	873	576	696	837	855	583	614	848	758	807	1039	1158	0	847
10760	1072.49	416.233		NA	NA	NA	NA	NA	NA	NA	NA	860	897	769	981	660	960	1214	723	436	910	572	754	613	502	348	610
1223	585.08	381.115		NA	NA	NA	NA	NA	NA	NA	NA	722	688	513	731	534	783	818	602	457	493	699	929	864	1008	896	1077
8957	1010.06	138.104		NA	NA	NA	NA	NA	NA	NA	NA	863	958	649	634	738	844	648	583	551	831	896	804	838	702	581	695
4398	218.82	278.079		NA	NA	NA	NA	NA	NA	NA	NA	370	613	834	623	497	747	381	510	525	874	682	453	1883	1519	742	563
2226	1023.84	361.207		NA	NA	NA	NA	NA	NA	NA	NA	0	775	828	902	745	682	902	749	860	690	900	827	1005	1046	909	0
1076	436.66	360.07		NA	NA	NA	NA	NA	NA	NA	NA	385	436	329	857	828	2331	500	538	337	2088	665	900	290	270	469	597
905	314.26	415.242		NA	NA	NA	NA	NA	NA	NA	NA	827	973	739	760	709	891	873	790	658	534	772	744	682	721	573	577
7205	919.58	352.26		NA	NA	NA	NA	NA	NA	NA	NA	893	679	798	722	1056	796	577	691	546	877	603	683	635	747	764	764
9319	1023.86	352.24		NA	NA	NA	NA	NA	NA	NA	NA	680	721	774	757	663	795	705	779	852	767	786	861	687	679	658	674
1505	787.59	424.178		NA	NA	NA	NA	NA	NA	NA	NA	638	741	809	645	964	627	831	654	646	657	693	840	768	727	706	895
7441	937.22	541.419		NA	NA	NA	NA	NA	NA	NA	NA	699	731	646	647	716	793	729	672	746	734	838	868	708	677	828	810
8515	995.48	421.298		NA	NA	NA	NA	NA	NA	NA	NA	549	1512	730	590	946	2119	549	487	311	1481	469	512	498	268	389	438
9933	1045.63	166.1		NA	NA	NA	NA	NA	NA	NA	NA	663	826	755	986	717	741	700	721	749	906	611	718	645	664	669	778
3356	57.92	537.975		NA	NA	NA	NA	NA	NA	NA	NA	511	397	673	910	832	686	678	652	712	766	912	913	950	1005	630	623
4762	243.22	382.067		NA	NA	NA	NA	NA	NA	NA	NA	923	643	724	1088	640	778	945	652	517	720	1040	553	826	655	585	573
861	294.73	472.252		NA	NA	NA	NA	NA	NA	NA	NA	675	708	777	807	744	745	657	739	685	856	744	766	685	704	891	692
10052	1047.96	138.104		NA	NA	NA	NA	NA	NA	NA	NA	1127	835	739	601	810	1030	493	528	558	1136	619	670	669	878	533	652
10438	1060.43	328.199		NA	NA	NA	NA	NA	NA	NA	NA	731	822	754	637	749	783	915	793	686	806	723	666	695	685	757	678
3880	66.39	484.048		NA	NA	NA	NA	NA	NA	NA	NA	632	469	734	685	714	733	765	700	631	812	917	974	779	1051	702	582
9586	1031.63	558.444		NA	NA	NA	NA	NA	NA	NA	NA	974	810	2234	1373	706	776	0	835	605	977	448	393	438	330	0	989
3093	54.73	1011.71		NA	NA	NA	NA	NA	NA	NA	NA	1100	1002	0	1002	855	1035	751	621	350	916	813	871	870	0	873	837
1018	383.8	548.044		NA	NA	NA	NA	NA	NA	NA	NA	786	241	832	626	746	886	899	315	447	507	1000	227	937	752	1144	1555
29	50.47	853.789		NA	NA	NA	NA	NA	NA	NA	NA	598	848	821	759	1002	0	726	746	555	865	779	1044	1218	0	930	1010
3893	65	256.02		NA	NA	NA	NA	NA	NA	NA	NA	529	576	634	684	630	562	590	447	891	672	1139	774	788	762	1320	906
6791	879.71	224.124		NA	NA	NA	NA	NA	NA	NA	NA	709	728	772	756	619	688	782	878	764	752	691	703	716	641	780	925
6464	834.38	479.299		NA	NA	NA	NA	NA	NA	NA	NA	567	744	871	906	739	826	843	707	475	816	923	925	543	812	616	602
1914	946.39	384.25		NA	NA	NA	NA	NA	NA	NA	NA	676	855	771	780	801	827	777	668	839	590	789	600	794	703	732	714
11005	1078.91	206.152		NA	NA	NA	NA	NA	NA	NA	NA	894	805	796	859	0	760	819	879	651	718	862	817	793	767	798	699
2450	1072.8	446.338		NA	NA	NA	NA	NA	NA	NA	NA	524	347	635	1219	678	1010	445	1765	428	409	1020	622	548	582	1038	648
1	5.13	193.11		NA	NA	NA	NA	NA	NA	NA	NA	685	671	827	669	860	802	807	727	729	707	752	722	675	812	752	722
2562	49.68	657.852		NA	NA	NA	NA	NA	NA	NA	NA	709	773	785	847	958	0	638	770	487	793	777	824	1042	867	813	837
3088	54.68	646.074		NA	NA	NA	NA	NA	NA	NA	NA	780	1095	0	979	700	801	988	708	441	613	800	863	787	857	651	860
8670	1004.46	198.048		NA	NA	NA	NA	NA	NA	NA	NA	764	827	808	721	650	761	706	642	604	773	671	1045	848	668	705	732
6874	889.32	281.271		NA	NA	NA	NA	NA	NA	NA	NA	746	779	783	736	672	613	658	775	829	723	692	669	918	826	757	752
7477	940.33	208.073		NA	NA	NA	NA	NA	NA	NA	NA	182	1185	2146	1225	82	71	1572	546	410	0	283	2040	450	330	252	1156
1559	820.81	473.167		NA	NA	NA	NA	NA	NA	NA	NA	875	852	720	858	917	838	850	713	835	629	680	686	640	558	643	637
9340	1022.73	428.325		NA	NA	NA	NA	NA	NA	NA	NA	0	727	707	0	1823	1753	1506	0	0	1602	0	0	1639	0	1615	561
5636	386.09	188.084		NA	NA	NA	NA	NA	NA	NA	NA	953	690	698	1009	655	451	818	774	832	179	1017	1013	903	738	402	806
3378	57.97	573.087		NA	NA	NA	NA	NA	NA	NA	NA	636	826	705	836	616	544	1086	1211	358	414	990	824	887	694	501	812
8978	1009.99	148.11		NA	NA	NA	NA	NA	NA	NA	NA	734	844	814	707	715	778	707	769	852	906	662	694	674	708	616	770
7688	954.55	488.148		NA	NA	NA	NA	NA	NA	NA	NA	1045	792	1071	876	748	785	1029	806	415	585	605	736	669	750	403	645
5963	678.42	678.428		NA	NA	NA	NA	NA	NA	NA	NA	159	210	0	369	1256	3121	114	0	0	2629	738	1651	805	696	0	212
4206	190.92	324.1		NA	NA	NA	NA	NA	NA	NA	NA	658	734	636	734	761	885	139	683	562	621	843	750	1118	1123	808	907
5857	617.81	290.105		NA	NA	NA	NA	NA	NA	NA	NA	1064	674	518	807	451	541	896	1142	436	520	672	1318	778	853	510	788
9111	1013.84	584.425		NA	NA	NA	NA	NA	NA	NA	NA	1012	1032	877	784	935	1182	0	824	1210	1684	0	1123	0	0	0	1307
5372	314.3	224.125		NA	NA	NA	NA	NA	NA	NA	NA	810	761	644	701	741	775	691	752	844	768	758	644	766	732	748	836
8199	982.17	334.144		NA	NA	NA	NA	NA	NA	NA	NA	579	883	456	1037	0	949	999	1026	839	782	312	774	852	769	883	831
7118	911.64	497.371		NA	NA	NA	NA	NA	NA	NA	NA	514	407	994	635	767	1529	467	872	873	1177	567	575	560	701	960	385
10175	1053.59	426.298		NA	NA	NA	NA	NA	NA	NA	NA	775	786	824	704	695	689	873	740	584	691	944	680	862	798	753	585
2759	53.11	727.853		NA	NA	NA	NA	NA	NA	NA	NA	774	621	606	684	1134	857	505	538	569	930	795	536	868	982	967	621
2501	36.47	157.954		NA	NA	NA	NA	NA	NA	NA	NA	880	1021	864	696	728	726	634	782	690	728	700	703	692	648	753	744
3817	62.22	371.106		NA	NA	NA	NA	NA	NA	NA	NA	1043	852	528	723	809	866	587	534	488	961	519	831	848	869	779	759
4863	253.04	90.0473		NA	NA	NA	NA	NA	NA	NA	NA	674	813	824	819	599	743	711	730	589	659	684	705	817	718	831	1082
1604	835.03	669.394		NA	NA	NA	NA	NA	NA	NA	NA	573	422	995	327	1318	994	108	785	537	840	951	1165	731	767	1056	435
8991	1010.12	741.53		NA	NA	NA	NA	NA	NA	NA	NA	978	637	472	435	422	1579	770	734	690	723	449	897	869	803	835	717
2186	1011.22	286.11		NA	NA	NA	NA	NA	NA	NA	NA	4219	0	929	258	94	0	130	0	0	0	220	385	1698	3472	105	501
10637	1067.66	96.0577		NA	NA	NA	NA	NA	NA	NA	NA	999	674	1175	688	1263	756	562	925	801	610	551	536	568	646	576	694
10673	1067.52	470.322		NA	NA	NA	NA	NA	NA	NA	NA	893	668	813	688	906	906	812	695	663	750	701	718	721	829	638	624
10305	1055.57	409.31		NA	NA	NA	NA	NA	NA	NA	NA	1582	943	1198	1378	1083	614	247	979	806	1149	0	640	0	360	0	1048
7293	927.14	539.286		NA	NA	NA	NA	NA	NA	NA	NA	552	535	850	931	807	847	795	833	932	789	963	919	873	654	267	481
9521	1030.96	654.457		NA	NA	NA	NA	NA	NA	NA	NA	1021	954	1034	946	857	949	396	932	990	958	493	865	315	0	402	917
3240	56.63	331.953		NA	NA	NA	NA	NA	NA	NA	NA	624	790	639	618	581	546	899	651	340	447	526	566	1298	1287	1263	955
10796	1075.61	298.054		NA	NA	NA	NA	NA	NA	NA	NA	685	729	713	795	677	762	757	783	494	915	859	719	964	711	723	749
4104	101.59	284.271		NA	NA	NA	NA	NA	NA	NA	NA	445	3690	409	833	718	487	681	456	510	493	381	422	518	403	860	730
1633	843.99	197.679		NA	NA	NA	NA	NA	NA	NA	NA	663	593	736	693	751	766	834	639	770	748	641	898	833	658	844	973
6470	835.89	253.24		NA	NA	NA	NA	NA	NA	NA	NA	736	829	678	697	770	724	743	748	779	687	832	619	825	684	742	948
5867	624.86	192.078		NA	NA	NA	NA	NA	NA	NA	NA	1025	851	990	554	427	557	639	389	572	399	817	657	1357	1211	613	984
2510	47	260.001		NA	NA	NA	NA	NA	NA	NA	NA	756	693	719	840	836	809	832	685	681	774	747	757	826	654	721	713
9882	1043.53	523.345		NA	NA	NA	NA	NA	NA	NA	NA	709	842	942	942	825	823	490	917	760	761	564	824	602	669	604	770
9080	1013.17	337.297		NA	NA	NA	NA	NA	NA	NA	NA	897	1261	563	379	403	912	451	355	596	1003	532	225	1288	1199	1366	614
9010	1010.88	884.546		NA	NA	NA	NA	NA	NA	NA	NA	691	1864	819	1269	613	338	933	1080	885	181	903	195	738	494	273	773
887	304.27	517.145		NA	NA	NA	NA	NA	NA	NA	NA	981	661	1217	198	0	960	653	526	429	1199	533	1205	860	878	990	761
3639	62.4	228.014		NA	NA	NA	NA	NA	NA	NA	NA	771	850	724	934	1139	1882	675	680	0	1884	884	860	0	0	0	771
2838	54.91	767.799		NA	NA	NA	NA	NA	NA	NA	NA	765	0	0	867	1065	871	387	1001	1024	817	963	1008	1084	927	1278	0
6524	842.99	493.338		NA	NA	NA	NA	NA	NA	NA	NA	955	0	0	442	1103	602	823	281	1292	0	0	0	3036	2976	549	0
6354	822.78	253.24		NA	NA	NA	NA	NA	NA	NA	NA	1098	787	738	667	633	679	652	677	934	690	665	802	741	820	739	739
7142	915.04	236.214		NA	NA	NA	NA	NA	NA	NA	NA	573	660	628	453	766	959	643	882	730	882	749	788	847	848	781	872
2149	1008.95	482.184		NA	NA	NA	NA	NA	NA	NA	NA	246	611	3334	1328	0	0	939	305	295	0	213	3109	410	257	0	1016
84	54.43	834.743		NA	NA	NA	NA	NA	NA	NA	NA	767	1002	903	695	819	1071	887	857	289	897	674	683	659	491	476	894
10901	1077.13	326.262		NA	NA	NA	NA	NA	NA	NA	NA	670	842	774	746	820	1016	1055	634	566	594	613	747	976	736	781	498
2133	1005.28	842.669		NA	NA	NA	NA	NA	NA	NA	NA	0	755	520	1022	805	1285	1377	627	676	612	559	351	1662	0	784	1034
9158	1015.72	514.353		NA	NA	NA	NA	NA	NA	NA	NA	504	558	878	523	1164	1188	505	666	502	1182	963	442	1016	694	531	756
10386	1061.04	666.425		NA	NA	NA	NA	NA	NA	NA	NA	505	691	737	563	2577	2259	124	652	758	1049	0	1035	0	185	159	779
1579	828.18	513.216		NA	NA	NA	NA	NA	NA	NA	NA	783	823	1362	777	385	579	1003	493	442	438	1081	861	759	620	690	979
8501	994.75	517.373		NA	NA	NA	NA	NA	NA	NA	NA	891	777	1006	1001	849	795	827	817	778	868	0	711	738	740	506	774
2321	1045.86	119.074		NA	NA	NA	NA	NA	NA	NA	NA	1145	1508	529	628	467	628	495	791	319	497	1049	514	911	1274	663	661
7731	958.26	651.411		NA	NA	NA	NA	NA	NA	NA	NA	459	517	463	725	1592	1698	613	591	385	1759	598	514	576	541	633	416
8447	991.77	428.233		NA	NA	NA	NA	NA	NA	NA	NA	1388	692	1332	568	1096	536	533	618	495	490	1290	739	527	627	565	585
4669	236.16	569.198		NA	NA	NA	NA	NA	NA	NA	NA	910	839	683	847	400	457	952	614	749	446	1083	800	877	702	962	764
3543	60.75	262.008		NA	NA	NA	NA	NA	NA	NA	NA	459	481	434	817	354	558	938	529	787	433	899	1117	683	628	1722	1250
9404	1027.14	478.386		NA	NA	NA	NA	NA	NA	NA	NA	889	758	780	741	866	792	422	1033	769	801	744	843	623	612	638	783
3176	56.22	389.784		NA	NA	NA	NA	NA	NA	NA	NA	618	843	1132	811	1083	907	932	705	0	972	752	654	711	599	449	927
7235	920.58	554.276		NA	NA	NA	NA	NA	NA	NA	NA	644	514	0	702	1296	0	489	794	655	1084	775	825	1140	1055	1139	984
1587	830.88	286.618		NA	NA	NA	NA	NA	NA	NA	NA	718	783	1284	677	557	546	757	489	696	376	1230	816	979	744	681	764
9402	1026.8	148.11		NA	NA	NA	NA	NA	NA	NA	NA	739	878	689	909	704	752	728	750	802	835	566	815	863	680	630	770
4015	87.05	348.079		NA	NA	NA	NA	NA	NA	NA	NA	668	852	891	566	305	514	650	544	603	478	1094	681	917	979	1326	1044
901	311.59	388.116		NA	NA	NA	NA	NA	NA	NA	NA	1260	247	241	1126	901	475	1226	253	234	306	1266	2208	347	406	1055	562
10181	1051.79	310.302		NA	NA	NA	NA	NA	NA	NA	NA	808	659	1166	1203	813	686	0	1459	885	927	0	738	654	668	745	706
3830	62.88	293.093		NA	NA	NA	NA	NA	NA	NA	NA	1084	857	1532	1185	703	634	787	1088	525	393	602	646	728	623	0	730
9527	1030.47	555.523		NA	NA	NA	NA	NA	NA	NA	NA	430	1586	862	0	1264	1214	0	0	715	471	266	2031	384	1068	1122	706
10061	1048.51	296.235		NA	NA	NA	NA	NA	NA	NA	NA	782	801	692	727	0	784	866	701	722	842	986	599	928	925	1062	706
3731	62.43	543.145		NA	NA	NA	NA	NA	NA	NA	NA	1224	1447	743	1067	892	1003	780	726	398	926	535	255	621	480	374	652
1681	869.2	183.066		NA	NA	NA	NA	NA	NA	NA	NA	723	894	1680	827	555	623	1004	446	585	689	979	686	510	482	616	830
4726	241.44	396.138		NA	NA	NA	NA	NA	NA	NA	NA	970	824	832	833	371	410	519	692	822	359	1147	678	1153	993	772	756
9027	1010.92	300.207		NA	NA	NA	NA	NA	NA	NA	NA	681	710	771	561	1073	1010	657	585	454	757	751	985	1126	662	793	556
7547	944.93	316.108		NA	NA	NA	NA	NA	NA	NA	NA	388	1501	694	486	558	713	1760	811	882	477	753	495	799	623	615	581
6052	729.46	218.152		NA	NA	NA	NA	NA	NA	NA	NA	761	749	904	486	404	692	1128	834	707	1011	582	641	993	837	755	652
10991	1079.53	414.348		NA	NA	NA	NA	NA	NA	NA	NA	0	0	241	376	0	513	2932	0	0	0	4079	287	1016	2692	0	0
2750	52.83	849.79		NA	NA	NA	NA	NA	NA	NA	NA	737	1090	0	794	1097	999	921	901	451	889	0	715	861	657	1064	962
6034	715.7	356.181		NA	NA	NA	NA	NA	NA	NA	NA	581	786	624	586	705	707	728	701	716	742	731	833	780	917	1006	1002
6451	834.66	698.337		NA	NA	NA	NA	NA	NA	NA	NA	0	673	1134	840	1502	1149	369	894	601	0	874	857	1330	0	863	1061
9870	1042.99	174.14		NA	NA	NA	NA	NA	NA	NA	NA	777	776	762	852	544	856	776	720	759	697	751	731	863	920	696	668
109	56.5	299.877		NA	NA	NA	NA	NA	NA	NA	NA	996	755	0	1060	1071	1008	627	1061	727	988	961	970	939	282	571	136
10034	1047.61	184.146		NA	NA	NA	NA	NA	NA	NA	NA	631	847	689	699	831	1036	906	576	651	739	820	638	878	842	690	680
2203	1015.11	246.089		NA	NA	NA	NA	NA	NA	NA	NA	668	639	802	771	774	760	888	660	673	797	692	802	878	772	662	917
4330	214.08	432.036		NA	NA	NA	NA	NA	NA	NA	NA	760	817	584	633	582	645	873	753	389	597	971	748	789	782	1158	1074
5484	334.63	166.063		NA	NA	NA	NA	NA	NA	NA	NA	743	658	620	797	475	528	715	797	613	652	1012	697	1185	1216	640	813
1437	754.82	347.602		NA	NA	NA	NA	NA	NA	NA	NA	952	976	855	833	877	1012	885	0	0	869	873	1118	1090	887	936	0
9667	1036.07	349.252		NA	NA	NA	NA	NA	NA	NA	NA	778	512	713	866	1849	996	203	688	1573	709	211	1693	207	0	129	1038
5270	292.85	509.172		NA	NA	NA	NA	NA	NA	NA	NA	415	597	1047	494	783	542	985	753	346	258	1401	985	1373	1056	509	630
6751	876.24	210.125		NA	NA	NA	NA	NA	NA	NA	NA	458	407	363	347	2102	2319	398	468	389	2385	453	441	277	402	560	407
8778	1008.53	386.245		NA	NA	NA	NA	NA	NA	NA	NA	186	607	1597	2371	230	1828	174	2061	300	1303	259	383	293	171	155	258
9796	1039.37	451.386		NA	NA	NA	NA	NA	NA	NA	NA	462	883	879	558	667	722	956	815	632	893	1000	0	891	1058	1021	744
6093	754.83	253.074		NA	NA	NA	NA	NA	NA	NA	NA	816	987	1031	732	839	624	994	895	908	874	848	0	828	881	925	0
8148	978.13	345.264		NA	NA	NA	NA	NA	NA	NA	NA	1053	738	1143	526	1114	1372	484	450	327	1117	504	723	617	611	685	724
3539	60.94	424.169		NA	NA	NA	NA	NA	NA	NA	NA	230	358	609	734	994	1010	420	497	556	900	771	1426	450	460	1949	826
6500	838.5	314.149		NA	NA	NA	NA	NA	NA	NA	NA	808	672	626	689	785	718	746	753	750	840	762	794	758	706	860	924
9252	1019.03	174.14		NA	NA	NA	NA	NA	NA	NA	NA	698	660	672	898	840	834	788	804	708	817	579	854	671	748	796	830
4099	96.81	131.095		NA	NA	NA	NA	NA	NA	NA	NA	0	828	992	779	644	617	736	916	385	362	558	800	1263	1078	697	1550
2120	1002.55	585.458		NA	NA	NA	NA	NA	NA	NA	NA	0	556	1057	771	1023	1166	603	894	0	797	933	1158	785	705	1149	608
10630	1065.92	134.11		NA	NA	NA	NA	NA	NA	NA	NA	920	660	850	635	1002	597	677	719	884	670	719	713	795	745	728	892
1753	898.18	464.198		NA	NA	NA	NA	NA	NA	NA	NA	1129	834	824	852	367	558	721	522	929	458	767	512	821	1157	738	1019
7540	944.79	473.371		NA	NA	NA	NA	NA	NA	NA	NA	690	419	759	650	613	1006	575	590	678	1042	593	478	1148	1330	1147	490
1658	859.31	732.302		NA	NA	NA	NA	NA	NA	NA	NA	626	570	1419	765	1132	0	251	642	814	824	915	962	745	749	1124	675
3550	60.21	260.029	D-Glucose 6-phosphate	NA	NA	NA	NA	NA	NA	NA	NA	1029	1160	839	1323	680	658	1305	696	447	710	706	912	334	462	359	595
2803	53.78	497.831		NA	NA	NA	NA	NA	NA	NA	NA	620	1030	869	806	825	801	982	499	174	820	690	809	910	745	885	761
1548	814.99	396.157		NA	NA	NA	NA	NA	NA	NA	NA	992	948	915	1161	963	818	635	698	698	665	796	789	567	637	449	496
2204	1015.54	441.311		NA	NA	NA	NA	NA	NA	NA	NA	816	949	830	829	729	783	826	711	651	683	780	682	712	797	770	680
1029	385.96	290.094		NA	NA	NA	NA	NA	NA	NA	NA	1088	667	843	1041	444	348	927	747	1051	249	1092	955	754	825	472	730
5024	264.7	494.06		NA	NA	NA	NA	NA	NA	NA	NA	451	1593	0	1005	0	734	419	1467	79	886	815	573	1272	1166	787	986
2623	51.69	598.838		NA	NA	NA	NA	NA	NA	NA	NA	0	0	865	0	0	1628	1266	1374	1030	0	697	1597	0	1267	1277	1239
7860	964.68	721.498		NA	NA	NA	NA	NA	NA	NA	NA	784	763	693	754	758	890	702	817	854	988	637	785	670	765	707	673
6301	815.85	524.231		NA	NA	NA	NA	NA	NA	NA	NA	779	728	956	888	924	898	922	805	725	975	832	1001	0	0	1029	785
376	183.01	383.107		NA	NA	NA	NA	NA	NA	NA	NA	612	882	1065	691	835	886	598	543	419	831	741	607	975	1112	807	646
7630	951.78	294.218		NA	NA	NA	NA	NA	NA	NA	NA	746	777	762	735	777	830	803	829	790	839	777	721	566	793	708	802
3717	61.4	745.115		NA	NA	NA	NA	NA	NA	NA	NA	1101	909	756	846	640	542	736	678	789	730	780	749	905	747	600	747
9347	1023.96	626.456		NA	NA	NA	NA	NA	NA	NA	NA	736	948	962	896	1095	779	545	862	687	1038	633	779	389	467	618	825
2852	53.07	833.816		NA	NA	NA	NA	NA	NA	NA	NA	773	819	679	1101	884	906	648	788	613	804	949	812	1096	1184	113	96
3727	62.39	147.093		NA	NA	NA	NA	NA	NA	NA	NA	665	883	728	856	841	1231	557	489	392	1385	577	631	753	668	734	876
37	50.8	250.153		NA	NA	NA	NA	NA	NA	NA	NA	956	1093	2844	1252	699	539	523	596	467	423	527	617	495	286	207	746
7324	929.75	473.372		NA	NA	NA	NA	NA	NA	NA	NA	1162	669	1625	569	420	587	638	547	434	617	1534	342	660	758	919	790
9363	1024.05	379.31		NA	NA	NA	NA	NA	NA	NA	NA	822	849	913	821	1686	1552	650	1022	0	1146	461	689	0	688	0	976
1334	678.54	680.411		NA	NA	NA	NA	NA	NA	NA	NA	144	180	331	406	1536	2460	174	0	243	2373	714	1882	793	859	0	190
10557	1064.67	164.104		NA	NA	NA	NA	NA	NA	NA	NA	974	798	709	769	764	728	792	748	622	724	787	708	792	746	829	796
1035	386.85	357.133		NA	NA	NA	NA	NA	NA	NA	NA	913	784	910	1066	561	425	811	772	853	238	1039	823	975	836	507	776
10271	1055.21	530.385		NA	NA	NA	NA	NA	NA	NA	NA	763	812	765	754	768	740	758	730	707	614	841	821	730	835	805	847
4916	256.65	482.104		NA	NA	NA	NA	NA	NA	NA	NA	637	446	1508	431	629	480	231	549	396	379	784	388	1708	1574	1242	908
3786	61.61	514.084		NA	NA	NA	NA	NA	NA	NA	NA	673	657	1151	802	763	585	882	1047	501	571	701	908	748	782	894	628
6094	754.96	448.147		NA	NA	NA	NA	NA	NA	NA	NA	1030	679	637	674	715	566	644	701	902	569	762	781	870	804	951	1012
1331	678.33	709.363		NA	NA	NA	NA	NA	NA	NA	NA	134	250	348	418	1603	2635	229	80	0	2212	701	1576	1221	890	0	0
373	181.56	179.08		NA	NA	NA	NA	NA	NA	NA	NA	644	507	759	720	769	913	664	600	442	763	862	647	1257	1123	610	1018
9883	1043.57	180.115		NA	NA	NA	NA	NA	NA	NA	NA	849	666	677	716	730	774	695	773	692	791	777	886	625	786	987	875
6731	873.78	430.248		NA	NA	NA	NA	NA	NA	NA	NA	2067	2217	559	1095	252	0	467	764	301	796	605	962	0	1011	891	317
6521	844.33	479.301		NA	NA	NA	NA	NA	NA	NA	NA	825	687	767	1030	1159	1050	1209	589	386	617	790	1061	392	463	635	648
10721	1071.25	226.162		NA	NA	NA	NA	NA	NA	NA	NA	829	0	1684	0	779	1983	941	828	0	1320	919	1372	912	0	749	0
6840	885.53	256.182		NA	NA	NA	NA	NA	NA	NA	NA	676	592	522	578	1915	1799	431	658	352	1660	439	443	595	595	659	414
858	292.46	371.216		NA	NA	NA	NA	NA	NA	NA	NA	798	940	878	798	890	742	812	716	771	725	719	776	687	746	639	692
4773	245.84	539.121		NA	NA	NA	NA	NA	NA	NA	NA	635	950	607	690	477	645	481	428	474	605	937	749	1236	1128	1227	1062
3083	55.46	635.729		NA	NA	NA	NA	NA	NA	NA	NA	678	1148	784	1063	917	1271	1103	810	353	1083	923	674	0	0	576	950
9496	1028.81	599.498		NA	NA	NA	NA	NA	NA	NA	NA	1159	853	715	0	725	538	0	972	1159	1542	949	727	1037	450	494	1017
277	63.05	334.97		NA	NA	NA	NA	NA	NA	NA	NA	739	996	757	674	927	760	838	624	572	734	739	581	741	802	1136	724
4349	216.26	156.042		NA	NA	NA	NA	NA	NA	NA	NA	683	557	866	1049	1054	1111	734	789	335	687	1031	594	446	367	1021	1020
4590	232.95	215.062		NA	NA	NA	NA	NA	NA	NA	NA	546	1265	777	777	888	749	709	461	308	773	814	532	845	1232	761	911
9580	1031.63	588.457		NA	NA	NA	NA	NA	NA	NA	NA	1246	0	2849	1949	949	1234	0	1280	0	1133	0	541	0	0	0	1167
9486	1028.69	306.248		NA	NA	NA	NA	NA	NA	NA	NA	873	803	820	857	763	1000	732	760	794	781	789	1023	797	796	0	763
10747	1073.28	548.44		NA	NA	NA	NA	NA	NA	NA	NA	766	729	728	725	818	656	794	722	694	727	693	940	765	858	877	859
1630	842.57	573.238		NA	NA	NA	NA	NA	NA	NA	NA	838	721	919	884	529	743	697	732	529	576	907	1215	968	674	630	801
10595	1066.91	192.136		NA	NA	NA	NA	NA	NA	NA	NA	549	786	669	783	688	706	760	865	684	644	636	797	926	952	887	1034
2902	55.94	300.954		NA	NA	NA	NA	NA	NA	NA	NA	836	1227	833	603	540	749	722	843	638	809	405	753	953	803	774	878
8967	1010.11	148.125		NA	NA	NA	NA	NA	NA	NA	NA	796	892	851	890	798	1179	566	773	578	921	632	778	599	684	655	782
2988	55.66	683.731		NA	NA	NA	NA	NA	NA	NA	NA	592	779	831	818	1195	1127	970	773	0	993	870	539	740	726	542	879
10070	1048.79	346.233		NA	NA	NA	NA	NA	NA	NA	NA	403	812	619	651	847	1030	1169	589	618	740	686	736	1331	690	1029	431
2505	39.19	284.271		NA	NA	NA	NA	NA	NA	NA	NA	565	660	653	760	506	543	609	1188	1183	584	591	957	1572	477	848	694
1495	785.74	452.361		NA	NA	NA	NA	NA	NA	NA	NA	640	546	809	1079	668	800	503	561	590	484	790	773	712	1150	1254	1035
9011	1010.67	628.47		NA	NA	NA	NA	NA	NA	NA	NA	1122	1133	1144	731	748	708	344	1160	805	913	460	1107	275	473	352	924
7451	937.97	818.51		NA	NA	NA	NA	NA	NA	NA	NA	596	573	886	1147	1172	673	771	978	1086	895	672	984	765	639	121	447
10699	1069.19	299.281		NA	NA	NA	NA	NA	NA	NA	NA	714	836	883	738	0	772	831	870	826	870	926	936	806	779	857	761
9541	1029.11	698.589		NA	NA	NA	NA	NA	NA	NA	NA	529	533	552	733	1453	3090	159	837	1016	877	0	922	240	393	147	925
10109	1049.39	242.188		NA	NA	NA	NA	NA	NA	NA	NA	643	842	732	782	788	742	859	682	551	782	1078	724	821	758	1016	615
5155	273.86	409.083		NA	NA	NA	NA	NA	NA	NA	NA	963	444	1139	648	863	209	229	441	212	133	1011	155	1988	1606	1445	929
4546	231.92	304.15		NA	NA	NA	NA	NA	NA	NA	NA	821	742	667	798	646	815	678	664	1048	790	576	931	719	600	983	940
9426	1028.76	382.287		NA	NA	NA	NA	NA	NA	NA	NA	485	550	1749	883	518	1128	422	952	1035	1263	487	802	387	259	586	913
2580	50	541.903		NA	NA	NA	NA	NA	NA	NA	NA	748	1023	569	744	886	743	890	657	484	758	742	713	1020	1010	645	802
2897	53.75	471.81		NA	NA	NA	NA	NA	NA	NA	NA	960	1198	861	718	910	822	1217	1026	262	707	516	692	576	588	406	976
8994	1010.19	682.458		NA	NA	NA	NA	NA	NA	NA	NA	449	495	738	635	1288	847	622	491	1307	690	487	987	623	456	1073	1250
1878	934.59	239.188		NA	NA	NA	NA	NA	NA	NA	NA	540	652	1095	739	920	985	498	712	431	931	772	594	1046	965	806	754
292	79.86	276.964		NA	NA	NA	NA	NA	NA	NA	NA	705	619	935	914	883	829	854	734	644	649	785	818	752	726	851	747
3527	59.33	314.086		NA	NA	NA	NA	NA	NA	NA	NA	687	915	1325	821	725	625	545	1048	509	648	979	565	781	751	501	1021
3603	62.1	735.093		NA	NA	NA	NA	NA	NA	NA	NA	1261	1505	1145	1270	315	271	1988	871	196	255	352	702	818	470	123	910
10823	1074.9	430.344		NA	NA	NA	NA	NA	NA	NA	NA	770	796	700	396	880	746	1228	435	593	1029	846	757	620	1158	725	774
6907	889.65	308.233		NA	NA	NA	NA	NA	NA	NA	NA	528	669	584	779	575	605	829	682	671	1003	530	552	1315	972	1346	818
4037	87.01	262.077		NA	NA	NA	NA	NA	NA	NA	NA	593	799	566	721	1022	647	838	652	524	0	72	794	1461	1365	1443	964
9476	1028.32	687.494		NA	NA	NA	NA	NA	NA	NA	NA	334	971	1079	853	827	1010	554	735	779	902	375	941	785	851	626	840
8235	983.17	731.543		NA	NA	NA	NA	NA	NA	NA	NA	660	677	715	798	665	834	954	676	780	821	757	748	774	766	817	1024
2053	984.63	222.198		NA	NA	NA	NA	NA	NA	NA	NA	786	713	919	757	895	722	844	745	678	725	918	769	692	809	790	705
10208	1052.4	430.379		NA	NA	NA	NA	NA	NA	NA	NA	1437	430	281	695	1514	956	762	809	0	0	3314	0	1139	425	706	0
3863	64.16	249.031		NA	NA	NA	NA	NA	NA	NA	NA	1177	883	672	877	857	824	1298	753	386	667	609	958	773	575	674	486
7135	914.48	190.078		NA	NA	NA	NA	NA	NA	NA	NA	704	847	673	800	837	781	829	756	750	680	821	851	804	735	774	828
9851	1042.22	424.334		NA	NA	NA	NA	NA	NA	NA	NA	381	580	1270	475	598	1129	613	922	636	1030	621	831	832	867	1024	662
921	321.32	205.074		NA	NA	NA	NA	NA	NA	NA	NA	584	740	896	588	974	866	962	709	595	814	730	674	849	808	922	763
10173	1051.59	564.284		NA	NA	NA	NA	NA	NA	NA	NA	0	1642	1749	0	0	0	0	1738	0	0	1727	1852	1949	1817	0	0
5485	335.03	224.124		NA	NA	NA	NA	NA	NA	NA	NA	914	677	707	758	740	764	837	716	698	801	755	755	886	820	783	866
176	61.12	405.136		NA	NA	NA	NA	NA	NA	NA	NA	1302	959	854	878	666	741	416	648	476	781	682	574	970	903	664	963
6983	898.29	218.203		NA	NA	NA	NA	NA	NA	NA	NA	882	628	726	696	820	873	756	851	742	853	733	800	735	785	871	733
6571	854.22	253.24		NA	NA	NA	NA	NA	NA	NA	NA	778	608	819	836	688	833	774	691	752	878	734	845	788	853	834	780
2674	53.13	713.828		NA	NA	NA	NA	NA	NA	NA	NA	0	0	967	0	0	2301	0	2591	1118	0	700	1014	0	1668	932	1206
6777	879.04	495.356		NA	NA	NA	NA	NA	NA	NA	NA	917	440	417	582	825	552	948	456	1513	501	0	543	1694	1868	1070	185
7190	917.34	598.459		NA	NA	NA	NA	NA	NA	NA	NA	625	1015	1019	856	1264	796	0	1151	1179	1441	0	1186	0	0	0	1980
8466	991.86	504.38		NA	NA	NA	NA	NA	NA	NA	NA	460	1074	245	1009	276	853	996	886	1013	926	252	647	902	1035	964	976
727	258.27	377.122		NA	NA	NA	NA	NA	NA	NA	NA	422	1450	440	553	534	579	322	828	553	782	1141	618	1256	1134	1059	846
2944	53.7	361.856		NA	NA	NA	NA	NA	NA	NA	NA	729	1098	624	1139	528	835	697	453	195	1027	601	804	870	988	1157	779
5323	303.46	386.136		NA	NA	NA	NA	NA	NA	NA	NA	1067	756	621	930	510	436	908	549	642	393	1110	609	748	802	1642	802
10354	1058.53	588.474		NA	NA	NA	NA	NA	NA	NA	NA	1111	854	644	660	1191	770	617	620	821	810	585	1070	234	644	774	1124
5425	323.48	472.173		NA	NA	NA	NA	NA	NA	NA	NA	798	651	825	938	561	625	824	785	678	689	1012	975	989	949	641	590
11105	905.41	654.384		NA	NA	NA	NA	NA	NA	NA	NA	369	460	689	654	1288	1489	308	507	471	1050	794	870	956	798	803	1024
8617	999.09	274.229		NA	NA	NA	NA	NA	NA	NA	NA	897	674	0	875	942	805	878	900	712	799	902	820	962	875	725	776
2315	1045.07	712.498		NA	NA	NA	NA	NA	NA	NA	NA	841	738	1106	912	1173	927	539	815	849	1083	475	1039	543	0	452	1052
2261	1033.9	578.45		NA	NA	NA	NA	NA	NA	NA	NA	706	899	797	702	681	757	793	669	695	764	860	715	860	1050	879	719
2947	53.53	835.746		NA	NA	NA	NA	NA	NA	NA	NA	0	0	907	428	306	1311	1487	1323	575	1293	978	996	870	756	765	553
17	49.74	424.947		NA	NA	NA	NA	NA	NA	NA	NA	708	745	849	817	916	793	780	691	582	769	787	770	779	801	949	814
10581	1064.91	247.136		NA	NA	NA	NA	NA	NA	NA	NA	717	660	875	745	826	721	725	776	857	725	780	890	856	705	808	890
10560	1064.27	136.102		NA	NA	NA	NA	NA	NA	NA	NA	739	772	647	722	1082	816	654	760	784	746	692	1001	717	625	839	960
1516	794.37	185.949		NA	NA	NA	NA	NA	NA	NA	NA	792	730	796	764	817	722	1061	702	921	716	732	694	848	826	696	743
3852	62.56	102.032		NA	NA	NA	NA	NA	NA	NA	NA	692	700	835	932	826	794	800	806	560	1067	1157	734	954	742	0	961
7727	956.37	292.2		NA	NA	NA	NA	NA	NA	NA	NA	758	667	728	689	949	956	713	701	769	1037	817	709	868	761	656	783
6057	734.57	185.949		NA	NA	NA	NA	NA	NA	NA	NA	813	777	670	1002	751	743	760	862	748	615	708	793	979	845	687	810
9275	1020.16	486.267		NA	NA	NA	NA	NA	NA	NA	NA	1099	1014	621	888	1624	0	628	999	865	492	984	676	566	606	591	920
1080	443.15	534.174		NA	NA	NA	NA	NA	NA	NA	NA	683	858	833	756	290	530	521	409	478	557	1309	1518	1529	1205	913	187
5386	317.66	503.295		NA	NA	NA	NA	NA	NA	NA	NA	878	761	689	777	744	891	880	681	698	782	800	958	732	729	721	856
6953	895.13	838.489		NA	NA	NA	NA	NA	NA	NA	NA	698	948	1070	1261	1276	771	793	818	897	774	0	729	807	982	205	550
7138	914.62	312.191		NA	NA	NA	NA	NA	NA	NA	NA	826	677	798	896	769	708	758	796	807	774	756	807	857	781	753	816
4082	91.3	511.191		NA	NA	NA	NA	NA	NA	NA	NA	0	420	313	415	372	330	207	537	579	362	945	494	3299	3161	832	314
7895	966.83	472.376		NA	NA	NA	NA	NA	NA	NA	NA	357	353	358	637	2840	1676	317	663	180	1565	555	535	578	698	569	703
5139	271.47	250.083		NA	NA	NA	NA	NA	NA	NA	NA	490	860	711	707	752	678	741	1120	390	577	1447	1010	655	729	717	1003
8661	1005.36	343.308		NA	NA	NA	NA	NA	NA	NA	NA	866	680	891	889	838	863	615	660	770	823	830	1000	747	720	709	687
5739	462.95	224.124		NA	NA	NA	NA	NA	NA	NA	NA	754	633	824	784	768	738	955	736	769	869	903	754	770	730	763	841
6505	842.4	555.263		NA	NA	NA	NA	NA	NA	NA	NA	0	2135	0	2051	1528	0	1981	0	1017	0	2408	0	0	0	0	1472
1641	853.98	365.235		NA	NA	NA	NA	NA	NA	NA	NA	419	911	522	341	1855	3703	338	280	118	2261	315	392	296	199	248	397
10940	1079.69	590.49		NA	NA	NA	NA	NA	NA	NA	NA	1572	768	0	1376	1668	556	349	1054	460	315	1478	410	700	545	399	946
10373	1060.33	174.14		NA	NA	NA	NA	NA	NA	NA	NA	549	715	1041	691	1082	1002	689	714	698	657	828	808	646	679	777	1021
8154	979.86	691.443		NA	NA	NA	NA	NA	NA	NA	NA	490	522	515	604	1359	1530	489	992	411	1797	715	894	653	526	624	476
1884	935.98	1164.82		NA	NA	NA	NA	NA	NA	NA	NA	1430	1181	0	0	0	2039	0	1250	1720	1752	0	1418	0	127	175	1506
1791	906.8	697.426		NA	NA	NA	NA	NA	NA	NA	NA	496	417	1349	597	1929	1310	169	597	589	878	820	1017	653	475	734	573
6081	747.59	185.949		NA	NA	NA	NA	NA	NA	NA	NA	795	774	730	783	853	808	709	695	882	706	701	799	849	800	891	829
8206	983.15	418.272		NA	NA	NA	NA	NA	NA	NA	NA	1303	554	1267	679	1499	972	678	568	552	722	928	724	576	592	512	478
4909	256.94	526.12		NA	NA	NA	NA	NA	NA	NA	NA	551	720	977	448	350	232	277	245	419	0	1033	114	2798	2387	1385	669
3303	57.38	363.045		NA	NA	NA	NA	NA	NA	NA	NA	450	729	390	441	232	339	984	678	776	337	834	552	1083	1394	2166	1222
3187	55.48	825.712		NA	NA	NA	NA	NA	NA	NA	NA	860	1159	950	896	1068	1282	929	861	411	1004	860	0	678	0	642	1010
3342	57.56	556.105		NA	NA	NA	NA	NA	NA	NA	NA	664	1072	948	790	617	834	756	772	351	694	840	850	896	864	709	959
1381	716.25	557.223		NA	NA	NA	NA	NA	NA	NA	NA	312	1193	634	1616	314	680	1556	1324	589	274	459	1577	584	369	697	446
1596	831.9	316.084		NA	NA	NA	NA	NA	NA	NA	NA	1017	782	529	837	715	741	795	670	749	873	739	861	806	737	962	812
162	59.99	758.156		NA	NA	NA	NA	NA	NA	NA	NA	713	649	920	1066	764	642	1031	993	483	360	817	889	962	827	720	792
9357	1023.2	443.344		NA	NA	NA	NA	NA	NA	NA	NA	597	0	699	745	896	1121	781	719	637	1235	747	642	1068	894	1263	593
4072	91.16	238.069		NA	NA	NA	NA	NA	NA	NA	NA	342	555	455	775	323	397	847	791	552	505	1055	940	1100	868	2051	1085
3982	87.33	438.047		NA	NA	NA	NA	NA	NA	NA	NA	551	747	656	624	384	627	685	741	506	753	1204	583	1112	933	1068	1468
9554	1029.54	516.379		NA	NA	NA	NA	NA	NA	NA	NA	1035	1027	1041	883	776	964	584	1258	1024	1031	603	1003	355	0	0	1062
9247	1021.55	684.482		NA	NA	NA	NA	NA	NA	NA	NA	3290	0	0	1639	0	0	1510	0	1660	0	2049	0	0	0	0	2501
4775	245.57	722.21		NA	NA	NA	NA	NA	NA	NA	NA	1963	403	0	1229	529	670	1144	1198	0	710	1283	866	965	0	1117	572
1469	771.39	385.246		NA	NA	NA	NA	NA	NA	NA	NA	663	812	770	729	800	761	801	877	816	1083	797	768	724	683	765	803
10857	1075.48	715.518		NA	NA	NA	NA	NA	NA	NA	NA	1107	973	805	317	538	985	1115	254	507	1206	448	1059	1028	595	1282	437
3445	58.72	842.14		NA	NA	NA	NA	NA	NA	NA	NA	864	1103	786	1226	856	1011	1170	596	418	1013	558	717	483	586	559	714
10211	1052.49	338.205		NA	NA	NA	NA	NA	NA	NA	NA	790	720	760	763	741	810	765	867	774	761	794	836	821	759	876	824
9990	1046.39	164.104		NA	NA	NA	NA	NA	NA	NA	NA	646	709	919	1013	788	782	939	676	864	691	701	626	763	1022	832	692
10886	1076.51	292.19		NA	NA	NA	NA	NA	NA	NA	NA	854	712	797	802	785	809	906	767	688	750	772	786	766	906	814	750
7601	947.25	218.202		NA	NA	NA	NA	NA	NA	NA	NA	703	753	805	660	888	705	913	709	770	817	914	758	808	869	733	869
5132	271.45	178.063		NA	NA	NA	NA	NA	NA	NA	NA	471	914	1044	665	757	551	856	799	430	296	1334	1272	1041	943	531	770
8592	998.72	635.416		NA	NA	NA	NA	NA	NA	NA	NA	435	563	558	922	1261	1450	662	924	397	1463	748	327	711	618	967	672
9737	1037.26	452.353		NA	NA	NA	NA	NA	NA	NA	NA	713	703	797	877	682	681	956	727	718	827	1075	607	760	904	902	755
10544	1063.43	514.349		NA	NA	NA	NA	NA	NA	NA	NA	1033	1006	943	791	899	925	593	785	664	824	630	574	875	771	700	675
8951	1009.7	166.049		NA	NA	NA	NA	NA	NA	NA	NA	849	817	785	832	778	1089	708	881	616	872	834	817	800	726	847	441
11022	87.05	261.066		NA	NA	NA	NA	NA	NA	NA	NA	1290	1179	928	0	552	426	1524	949	556	496	593	823	1078	918	503	877
10304	1055.57	713.5		NA	NA	NA	NA	NA	NA	NA	NA	916	719	453	541	611	1024	0	993	821	411	446	769	1098	1194	1976	726
10069	1048.79	206.166		NA	NA	NA	NA	NA	NA	NA	NA	806	801	823	709	969	1052	894	643	583	836	735	771	785	875	744	674
9000	1010.43	754.536		NA	NA	NA	NA	NA	NA	NA	NA	1218	2014	695	404	0	0	978	1949	1129	1432	297	417	385	1092	691	0
7964	971.11	300.208		NA	NA	NA	NA	NA	NA	NA	NA	947	611	990	742	971	850	808	696	649	742	649	813	927	811	821	678
1222	582.35	192.078		NA	NA	NA	NA	NA	NA	NA	NA	1479	572	633	717	537	428	578	382	445	307	1788	2064	666	714	1158	240
2177	1010.42	795.578		NA	NA	NA	NA	NA	NA	NA	NA	378	429	414	813	680	679	1062	0	1271	834	480	549	1056	1178	908	1978
6542	847.46	278.09		NA	NA	NA	NA	NA	NA	NA	NA	1068	780	824	863	606	520	961	754	614	566	1212	1069	0	984	1146	749
9689	1035.33	404.314		NA	NA	NA	NA	NA	NA	NA	NA	775	880	789	778	751	875	770	781	770	754	699	722	910	834	807	822
2932	53.79	429.843		NA	NA	NA	NA	NA	NA	NA	NA	717	1297	649	908	697	755	916	349	239	1071	703	786	908	993	793	936
5725	446.92	324.099		NA	NA	NA	NA	NA	NA	NA	NA	58	144	289	349	1739	2671	919	775	1080	2526	278	136	431	271	282	771
10800	1074.36	418.307		NA	NA	NA	NA	NA	NA	NA	NA	716	647	724	737	677	716	1401	774	660	662	1207	686	662	774	1026	650
2536	51.92	493.87		NA	NA	NA	NA	NA	NA	NA	NA	912	825	413	948	0	242	1032	932	618	1194	997	792	875	960	962	1017
1470	773.37	373.204		NA	NA	NA	NA	NA	NA	NA	NA	1629	567	730	187	303	664	375	244	205	1309	562	353	469	1358	2612	1154
748	259.4	1011.12		NA	NA	NA	NA	NA	NA	NA	NA	0	801	1004	827	825	803	742	759	785	777	885	771	882	1168	856	837
3236	56.7	308.987		NA	NA	NA	NA	NA	NA	NA	NA	584	672	674	594	392	547	601	959	1142	481	1331	671	1189	1153	1149	584
10050	1047.93	148.11		NA	NA	NA	NA	NA	NA	NA	NA	826	921	793	1096	840	913	602	657	778	1223	553	843	677	581	652	773
87	54.6	1073.74		NA	NA	NA	NA	NA	NA	NA	NA	891	517	721	885	866	675	579	1011	1086	721	751	848	755	926	879	624
6698	869.27	557.279		NA	NA	NA	NA	NA	NA	NA	NA	1214	1121	1871	0	535	677	0	500	465	775	1300	958	837	620	873	992
4772	245.81	338.111		NA	NA	NA	NA	NA	NA	NA	NA	570	621	236	852	264	275	915	829	226	259	647	1679	1400	1454	1586	934
7705	955.96	278.26		NA	NA	NA	NA	NA	NA	NA	NA	429	324	661	424	1097	1488	372	554	398	1570	1722	910	707	736	643	719
10603	1066.5	183.163		NA	NA	NA	NA	NA	NA	NA	NA	712	647	725	969	980	697	793	656	641	571	743	841	921	1023	916	926
4154	168.8	238.041		NA	NA	NA	NA	NA	NA	NA	NA	860	954	692	800	543	500	879	877	521	530	793	1093	1118	803	843	955
2507	41.22	180.943		NA	NA	NA	NA	NA	NA	NA	NA	791	956	876	725	908	767	746	730	850	697	823	825	800	790	693	787
8480	992.89	234.198		NA	NA	NA	NA	NA	NA	NA	NA	878	538	1233	743	1701	1245	705	850	513	716	0	771	866	698	658	651
2936	53.31	961.768		NA	NA	NA	NA	NA	NA	NA	NA	870	719	876	785	839	963	745	870	538	681	703	801	915	723	899	847
4670	236.33	377.017		NA	NA	NA	NA	NA	NA	NA	NA	1006	748	837	895	686	626	998	742	839	545	874	841	787	812	878	661
2757	54.69	851.76		NA	NA	NA	NA	NA	NA	NA	NA	777	0	805	829	1050	1052	615	1158	569	915	909	844	858	740	836	819
2341	1049.45	408.326		NA	NA	NA	NA	NA	NA	NA	NA	1350	0	0	1345	0	0	1988	1425	0	1317	1889	0	1715	1750	0	0
10622	1067.71	244.168		NA	NA	NA	NA	NA	NA	NA	NA	1528	863	1606	777	1824	1330	315	844	720	765	417	343	233	494	265	459
2449	1072.7	537.403		NA	NA	NA	NA	NA	NA	NA	NA	640	719	1103	644	837	999	819	559	648	1012	593	605	840	826	834	1109
2123	1003.3	618.42		NA	NA	NA	NA	NA	NA	NA	NA	1049	925	857	859	852	959	785	731	785	639	666	738	703	769	732	740
6782	878.19	635.389		NA	NA	NA	NA	NA	NA	NA	NA	761	589	1047	625	1173	1035	450	683	547	845	934	771	906	866	896	662
1311	661.49	606.208		NA	NA	NA	NA	NA	NA	NA	NA	572	619	942	889	1134	738	1753	857	469	431	690	630	884	681	777	724
6133	766.78	248.198		NA	NA	NA	NA	NA	NA	NA	NA	749	839	870	973	711	825	749	753	650	822	953	731	805	782	774	809
3261	56.84	278.955		NA	NA	NA	NA	NA	NA	NA	NA	843	1060	1032	720	712	588	817	834	573	495	1025	682	928	821	674	993
3602	62.5	154.073		NA	NA	NA	NA	NA	NA	NA	NA	509	981	992	534	1553	1739	650	579	217	1398	627	504	694	591	524	716
10321	1056.98	707.461		NA	NA	NA	NA	NA	NA	NA	NA	264	1195	865	302	886	699	260	156	1231	156	1521	705	650	1463	1408	1055
9414	1027.51	592.457		NA	NA	NA	NA	NA	NA	NA	NA	761	997	1012	1164	825	794	767	897	891	966	467	824	451	586	527	893
10593	1065.83	155.131		NA	NA	NA	NA	NA	NA	NA	NA	945	852	798	905	920	714	821	645	788	623	649	719	1090	869	828	656
7050	905.34	256.24		NA	NA	NA	NA	NA	NA	NA	NA	564	566	725	671	945	1135	587	562	578	1000	797	942	1187	1007	731	829
3826	62.35	210.073		NA	NA	NA	NA	NA	NA	NA	NA	856	788	1453	764	1173	838	579	774	507	1132	726	391	754	818	466	808
9368	1024.29	597.478		NA	NA	NA	NA	NA	NA	NA	NA	0	0	1259	0	0	0	1359	1269	2554	0	739	738	628	730	2192	1367
10242	1053.42	334.282		NA	NA	NA	NA	NA	NA	NA	NA	814	841	906	600	674	889	845	855	731	862	773	678	930	923	857	660
7700	957.69	308.234		NA	NA	NA	NA	NA	NA	NA	NA	667	779	1222	629	581	698	787	814	637	547	1534	752	0	1053	1080	1063
6928	892.11	545.321		NA	NA	NA	NA	NA	NA	NA	NA	469	530	1366	581	1269	1132	393	981	484	839	572	604	943	1024	1019	642
965	344.17	574.204		NA	NA	NA	NA	NA	NA	NA	NA	1742	453	594	1093	301	772	454	722	461	1142	1116	1013	819	622	1085	460
10251	1053.72	597.481		NA	NA	NA	NA	NA	NA	NA	NA	0	528	791	608	1219	0	1142	820	1542	566	660	671	667	632	1655	1350
1895	938.9	497.393		NA	NA	NA	NA	NA	NA	NA	NA	768	877	800	750	801	854	726	677	844	705	860	939	756	741	923	830
1846	924.09	422.323		NA	NA	NA	NA	NA	NA	NA	NA	687	739	769	714	613	712	637	803	786	845	978	1165	909	716	970	811
3492	58.59	262.067		NA	NA	NA	NA	NA	NA	NA	NA	755	633	666	794	760	820	550	769	796	1011	989	897	839	896	813	868
5683	420	370.126		NA	NA	NA	NA	NA	NA	NA	NA	865	1017	862	364	1223	953	353	493	472	1107	681	579	626	617	786	1859
2951	53.6	967.787		NA	NA	NA	NA	NA	NA	NA	NA	947	0	800	978	1004	872	587	0	1067	1059	1100	1041	1315	1002	1090	0
4651	235.93	587.107		NA	NA	NA	NA	NA	NA	NA	NA	1125	774	633	1183	523	626	970	551	778	624	1002	872	925	806	867	603
7621	950.95	290.224		NA	NA	NA	NA	NA	NA	NA	NA	951	980	810	689	1002	885	771	817	763	749	847	717	1007	0	889	989
10712	1071.64	408.339		NA	NA	NA	NA	NA	NA	NA	NA	563	960	943	778	1037	1213	505	763	503	761	682	693	544	833	1345	745
7800	961.13	269.239		NA	NA	NA	NA	NA	NA	NA	NA	1003	699	742	780	827	783	886	696	760	730	845	919	882	900	686	734
9530	1029.05	528.399		NA	NA	NA	NA	NA	NA	NA	NA	0	1268	1121	1018	1106	1019	791	1280	0	848	727	0	903	733	1117	943
2469	1077.51	187.121		NA	NA	NA	NA	NA	NA	NA	NA	729	706	749	833	777	819	818	936	843	775	806	722	848	748	979	788
8436	993.28	841.666		NA	NA	NA	NA	NA	NA	NA	NA	0	890	844	1113	1512	1553	1555	694	0	0	994	517	1578	0	627	999
2984	55.9	447.818		NA	NA	NA	NA	NA	NA	NA	NA	750	1116	793	1014	933	1020	1002	766	228	973	922	722	495	559	439	1147
5018	264.01	186.071		NA	NA	NA	NA	NA	NA	NA	NA	1068	533	630	934	525	504	1048	852	1037	398	1397	736	958	852	600	808
6100	758.98	472.259		NA	NA	NA	NA	NA	NA	NA	NA	648	2396	1137	1631	552	1018	320	1434	591	1007	194	1291	0	216	0	445
5012	262.46	323.082		NA	NA	NA	NA	NA	NA	NA	NA	670	658	1116	754	262	369	363	332	255	412	770	232	2423	2307	1339	622
9925	1044.05	232.182		NA	NA	NA	NA	NA	NA	NA	NA	1051	1254	1065	1220	1266	1268	230	931	1254	1000	0	0	427	326	306	1288
8686	1003.46	272.16		NA	NA	NA	NA	NA	NA	NA	NA	859	776	818	596	1002	722	929	684	861	720	989	856	1010	782	639	643
1013	380.03	487.221		NA	NA	NA	NA	NA	NA	NA	NA	422	1207	2186	1153	912	1201	370	221	340	1224	756	112	1267	1096	137	282
788	264.99	546.979		NA	NA	NA	NA	NA	NA	NA	NA	508	1670	292	729	271	0	357	1537	174	1129	1124	0	1428	1464	1031	1173
9376	1026.36	542.396		NA	NA	NA	NA	NA	NA	NA	NA	1159	1047	1089	1008	966	1068	256	941	1152	1013	420	1069	0	380	402	919
3428	58.49	895.201		NA	NA	NA	NA	NA	NA	NA	NA	828	1105	929	778	461	591	1238	1227	142	515	1069	716	900	968	564	859
6224	802.28	264.172		NA	NA	NA	NA	NA	NA	NA	NA	604	719	683	654	1043	965	891	848	837	1184	918	643	740	781	656	726
10910	1077.45	458.341		NA	NA	NA	NA	NA	NA	NA	NA	0	0	0	0	301	0	3322	304	299	393	3330	0	0	2723	2223	0
9478	1028.4	663.453		NA	NA	NA	NA	NA	NA	NA	NA	778	720	816	872	835	951	700	905	792	1110	469	1042	761	598	759	792
5632	385.7	136.053		NA	NA	NA	NA	NA	NA	NA	NA	1146	436	858	1069	450	243	1142	616	643	153	1793	1055	1148	883	483	784
7793	960.11	318.217		NA	NA	NA	NA	NA	NA	NA	NA	463	943	611	529	1377	854	1056	498	668	781	765	733	941	781	955	948
9686	1035.24	567.421		NA	NA	NA	NA	NA	NA	NA	NA	1390	969	984	887	1245	1281	0	1034	1157	1327	0	1396	0	0	0	1238
9239	1019.99	540.376		NA	NA	NA	NA	NA	NA	NA	NA	957	1094	0	0	945	882	1059	0	936	1051	901	922	978	976	1146	1075
10604	1066.45	182.071		NA	NA	NA	NA	NA	NA	NA	NA	845	889	744	814	903	704	729	774	893	762	742	936	712	693	1018	766
6559	849.64	328.261		NA	NA	NA	NA	NA	NA	NA	NA	800	509	992	573	1046	1494	294	672	463	1184	884	851	913	769	731	750
9200	1018.92	180.115		NA	NA	NA	NA	NA	NA	NA	NA	761	711	917	1022	897	710	762	861	754	696	730	818	754	781	871	883
5764	491.01	178.099		NA	NA	NA	NA	NA	NA	NA	NA	888	754	747	956	799	976	698	784	818	706	730	659	862	816	876	862
6196	787.65	393.101		NA	NA	NA	NA	NA	NA	NA	NA	886	714	948	721	970	815	947	772	655	683	871	796	879	782	825	668
7230	920.33	306.217		NA	NA	NA	NA	NA	NA	NA	NA	524	782	588	734	478	811	1090	777	778	1121	540	631	776	1229	1182	893
6597	856.63	308.197		NA	NA	NA	NA	NA	NA	NA	NA	863	623	703	587	1273	1782	592	707	472	1500	541	671	720	615	617	672
4653	236.08	798.206		NA	NA	NA	NA	NA	NA	NA	NA	1139	850	734	833	666	841	967	831	904	721	972	791	982	940	0	770
6738	875.11	316.201		NA	NA	NA	NA	NA	NA	NA	NA	536	1097	1414	140	1413	1494	737	301	549	1745	601	848	224	895	182	765
8373	990.53	759.571		NA	NA	NA	NA	NA	NA	NA	NA	0	752	1073	977	631	499	963	653	670	1541	1066	390	556	736	1237	1205
1531	802.86	173.985		NA	NA	NA	NA	NA	NA	NA	NA	665	774	772	709	757	893	774	803	856	661	721	631	921	904	1192	918
8018	974.25	759.574		NA	NA	NA	NA	NA	NA	NA	NA	675	756	928	976	599	753	1103	911	0	1264	819	467	537	870	1076	1218
2578	49.84	526.895		NA	NA	NA	NA	NA	NA	NA	NA	655	815	718	855	946	979	718	696	439	784	709	676	1052	1053	963	895
6471	836.34	448.259		NA	NA	NA	NA	NA	NA	NA	NA	305	314	0	425	160	0	895	0	0	0	949	245	0	3301	6360	0
9636	1033.49	496.381		NA	NA	NA	NA	NA	NA	NA	NA	768	830	803	604	744	703	1003	921	691	723	956	716	880	907	930	776
104	56.24	459.766		NA	NA	NA	NA	NA	NA	NA	NA	673	844	866	840	1490	1195	1058	926	234	1063	894	739	728	0	0	1407
3899	67.38	396.99		NA	NA	NA	NA	NA	NA	NA	NA	1235	1320	1005	1021	562	548	1639	954	420	583	589	710	544	551	309	970
2567	50.06	354.972		NA	NA	NA	NA	NA	NA	NA	NA	715	840	745	826	961	935	790	593	476	731	714	929	887	963	1060	804
3073	54.35	231.899		NA	NA	NA	NA	NA	NA	NA	NA	0	1668	1437	1776	1169	1657	0	0	0	1869	1458	0	0	1936	0	0
[truncated: 3,920 more rows]

## Sheet: Table S4
PERMANOVA results
Df Sum Of Sqs R2 F Pr(>F)
treatment 3 245.03 0.3267 1.9409 0.004 **
Residual 12 504.97 0.6733
Total 15 750.00 1.0000
	Df SumOfSqs R2 F Pr(>F)
Amino acid glycosides	3, 12	8.2546 0.55031 4.8949 0.031 *
Aminosugars and aminoglycosides	3, 12	5.1174 0.34116 2.0713 0.182
Anthranilic acid alkaloids	3, 12	6.7841 0.45227 3.3029 0.05 *
Apocarotenoids	3, 12	2.3466 0.15644 0.7418 0.557
Aromatic polyketides	3, 12	10.4789 0.69859 9.2711 0.002 **
Carotenoids	3, 12	4.1903 0.27935 1.5506 0.192
Chromanes	3, 12	3.0293 0.20196 1.0122 0.442
Coumarins	3, 12	5.6016 0.37344 2.384 0.128
Cyclic polyketides	3, 12	2.1174 0.14116 0.6574 0.578
Diterpenoids	3, 12	4.6712 0.31141 1.809 0.198
Eicosanoids	3, 12	2.2068 0.14712 0.69 0.59
Fatty Acids and Conjugates	3, 12	6.07 0.40467 2.7189 0.078 .
Fatty acyl glycosides	3, 12	10.2569 0.68379 8.6499 0.003 **
Fatty acyls	3, 12	5.1097 0.34065 2.0666 0.136
Fatty amides	3, 12	1.2851 0.08567 0.3748 0.76
Fatty esters	3, 12	0.554 0.03693 0.1534 0.929
Flavonoids	3, 12	1.5004 0.10003 0.4446 0.72
Glycerolipids	3, 12	6.2478 0.41652 2.8554 0.08 .
Glycerophospholipids	3, 12	4.6682 0.31121 1.8073 0.187
Guanidine alkaloids	3, 12	2.1199 0.14133 0.6584 0.662
Isoflavonoids	3, 12	4.5201 0.30134 1.7253 0.204
Lignans	3, 12	9.03 0.602 6.0503 0.007 **
Linear polyketides	3, 12	8.0657 0.53771 4.6526 0.024 *
Lysine alkaloids	3, 12	1.6841 0.11227 0.5059 0.653
Meroterpenoids	3, 12	3.5224 0.23482 1.2276 0.339
Monoterpenoids	3, 12	4.4152 0.29435 1.6685 0.226
Naphthalenes	3, 12	4.8233 0.32155 1.8958 0.194
Nicotinic acid alkaloids	3, 12	1.7564 0.1171 0.5305 0.679
Nucleosides	3, 12	7.1132 0.47421 3.6076 0.05 *
Octadecanoids	3, 12	14.1432 0.94288 66.028 0.004 **
Oligopeptides	3, 12	1.7794 0.11863 0.5384 0.687
Ornithine alkaloids	3, 12	0.3084 0.02056 0.084 0.968
Peptide alkaloids	3, 12	11.136 0.7424 11.528 0.001 ***
Phenolic acids	3, 12	2.7629 0.18419 0.9031 0.452
Phenylpropanoids	3, 12	8.6957 0.57972 5.5174 0.01 **
Phloroglucinols	3, 12	6.4879 0.43253 3.0488 0.051 .
Polycyclic aromatic polyketides	3, 12	8.1278 0.54185 4.7308 0.028 *
Polyethers	3, 12	5.2008 0.34672 2.1229 0.146
Polyols	3, 12	3.2332 0.21554 1.0991 0.394
Pseudoalkaloids	3, 12	8.9185 0.59457 5.866 0.01 **
Pseudoalkaloids (transamidation)	3, 12	2.8145 0.18763 0.9239 0.427
Saccharides	3, 12	2.4069 0.16046 0.7645 0.556
Sesquiterpenoids	3, 12	8.6481 0.57654 5.446 0.021 *
Small peptides	3, 12	2.2726 0.15151 0.7142 0.577
Sphingolipids	3, 12	1.495 0.09967 0.4428 0.742
Steroids	3, 12	1.8191 0.12127 0.552 0.686
Triterpenoids	3, 12	2.4095 0.16064 0.7655 0.542
Tryptophan alkaloids	3, 12	4.0595 0.27063 1.4842 0.283
Tyrosine alkaloids	3, 12	8.5258 0.56839 5.2676 0.023 *
unclassified	3, 12	2.2425 0.1495 0.7031 0.609

## Sheet: Table S5
Glucosinolates
GSL Name	Abbreviation	Type	Percentage of Total GSLs (%)
Gluconasturtiin	2PE	Benzenic	45.5
Sinigrin	-	Aliphatic	39.4
Neoglucobrassicin	NEO	Indole	<1.0
4-Methoxyglucobrassicin	4-MEOH	Indole	<1.0
4-Hydroxyglucobrassicin	4-OH	Indole	<1.0
Glucosinolate Breakdown Products
Breakdown Product	Abbreviation	Origin GSL	Percentage of Total Breakdown Products (%)
2-Phenylethyl ITC	-	Gluconasturtiin	55.3
3-Phenylpropionitrile Cyanide	2-Phenylethyl CN	Gluconasturtiin	4.9
Allyl ITC	-	Sinigrin	20
Allyl CN	-	Sinigrin	14.6
1-Cyano-2,3-epithiopropane	CETP	Sinigrin	3
1-Methoxyindole-3-acetonitrile	1-Methoxyindole-3-ACN	Indole GSLs	<1.0
4-Methoxyindole-3-acetonitrile	4-Methoxyindole-3-ACN	Indole GSLs	<1.0

## Sheet: Figure S1
Figure S1. Photos confirming nematode-infection. Brassica nigra roots infected with (a) M. incognita only, (b) M. incognita + P. penetrans, and (c) P. penetrans only. Red arrows are pointed to root galls, black arrows point to root lesions—indicating M. incognita and P. penetrans infections, respectively. These pictures are of plants treated with nematodes, at the same time as the experimental pl…

## Sheet: Figure S2
		Figure. S2. Boxplots of differentially abundant (DA) features in the roots of nematode-infected (Mi, MP, Pp) plants versus uninfected control plants. Points represent the number of biological replicates per treatment (n Mi and Control = 5; n MP and Pp = 3). Abbreviations: Mi= Meloidogyne incognita, Pp= Pratylenchus penetrans, MP= M. incognita + P. penetrans.

[truncated: 2 more sheets: Figure S3, Method S1]
